# Supplementary material
Source: Research Square preprint supplement (doi:10.21203/rs.3.rs-8819144/v1)
Supplement: Supplementary file 1 [file 85c9bf25eced145a82fee48a.docx]

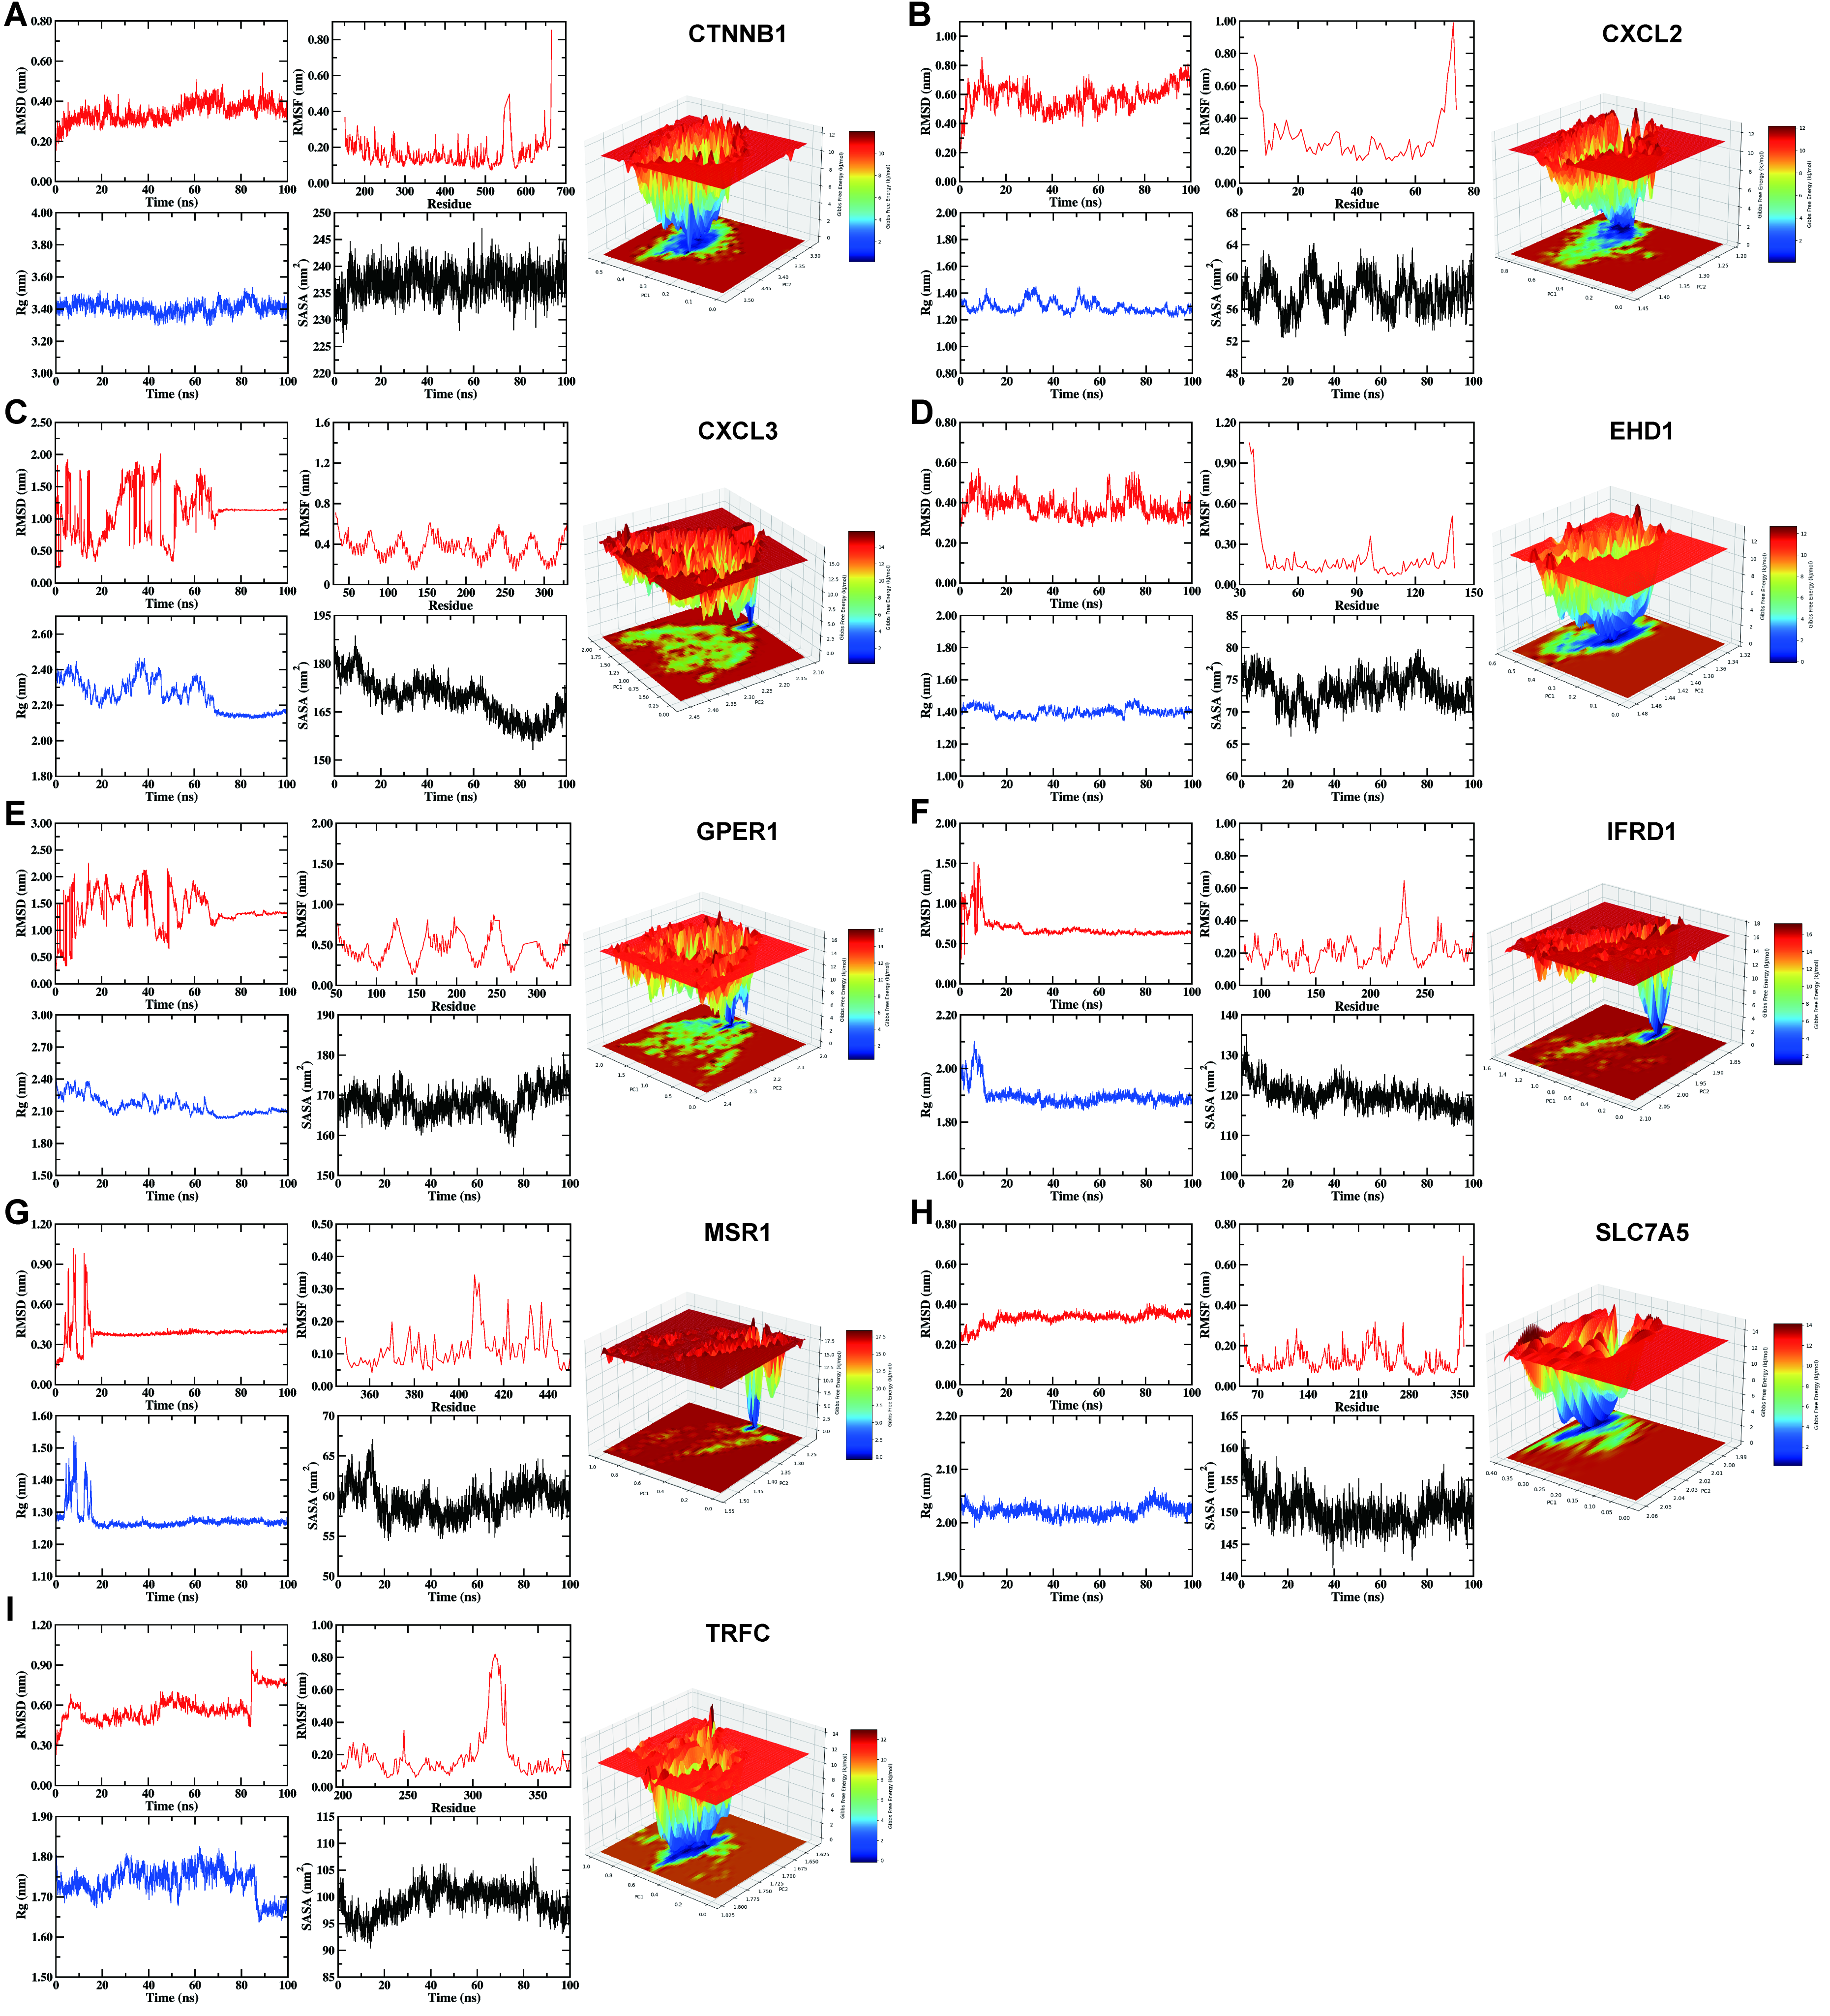


**Figure S1. Molecular dynamics simulations of asthma core targets were conducted.** Plots of RMSD, RMSF, Rg, SASA, hydrogen bond counts, and Gibbs free energy landscapes for protein-ligand complexes involving 1-NP with CTNNB1, CXCL2, CXCL3, EHD1, GPER1, IFRD1, MSR1, SLC7A5, and TFRC were presented over time.

**
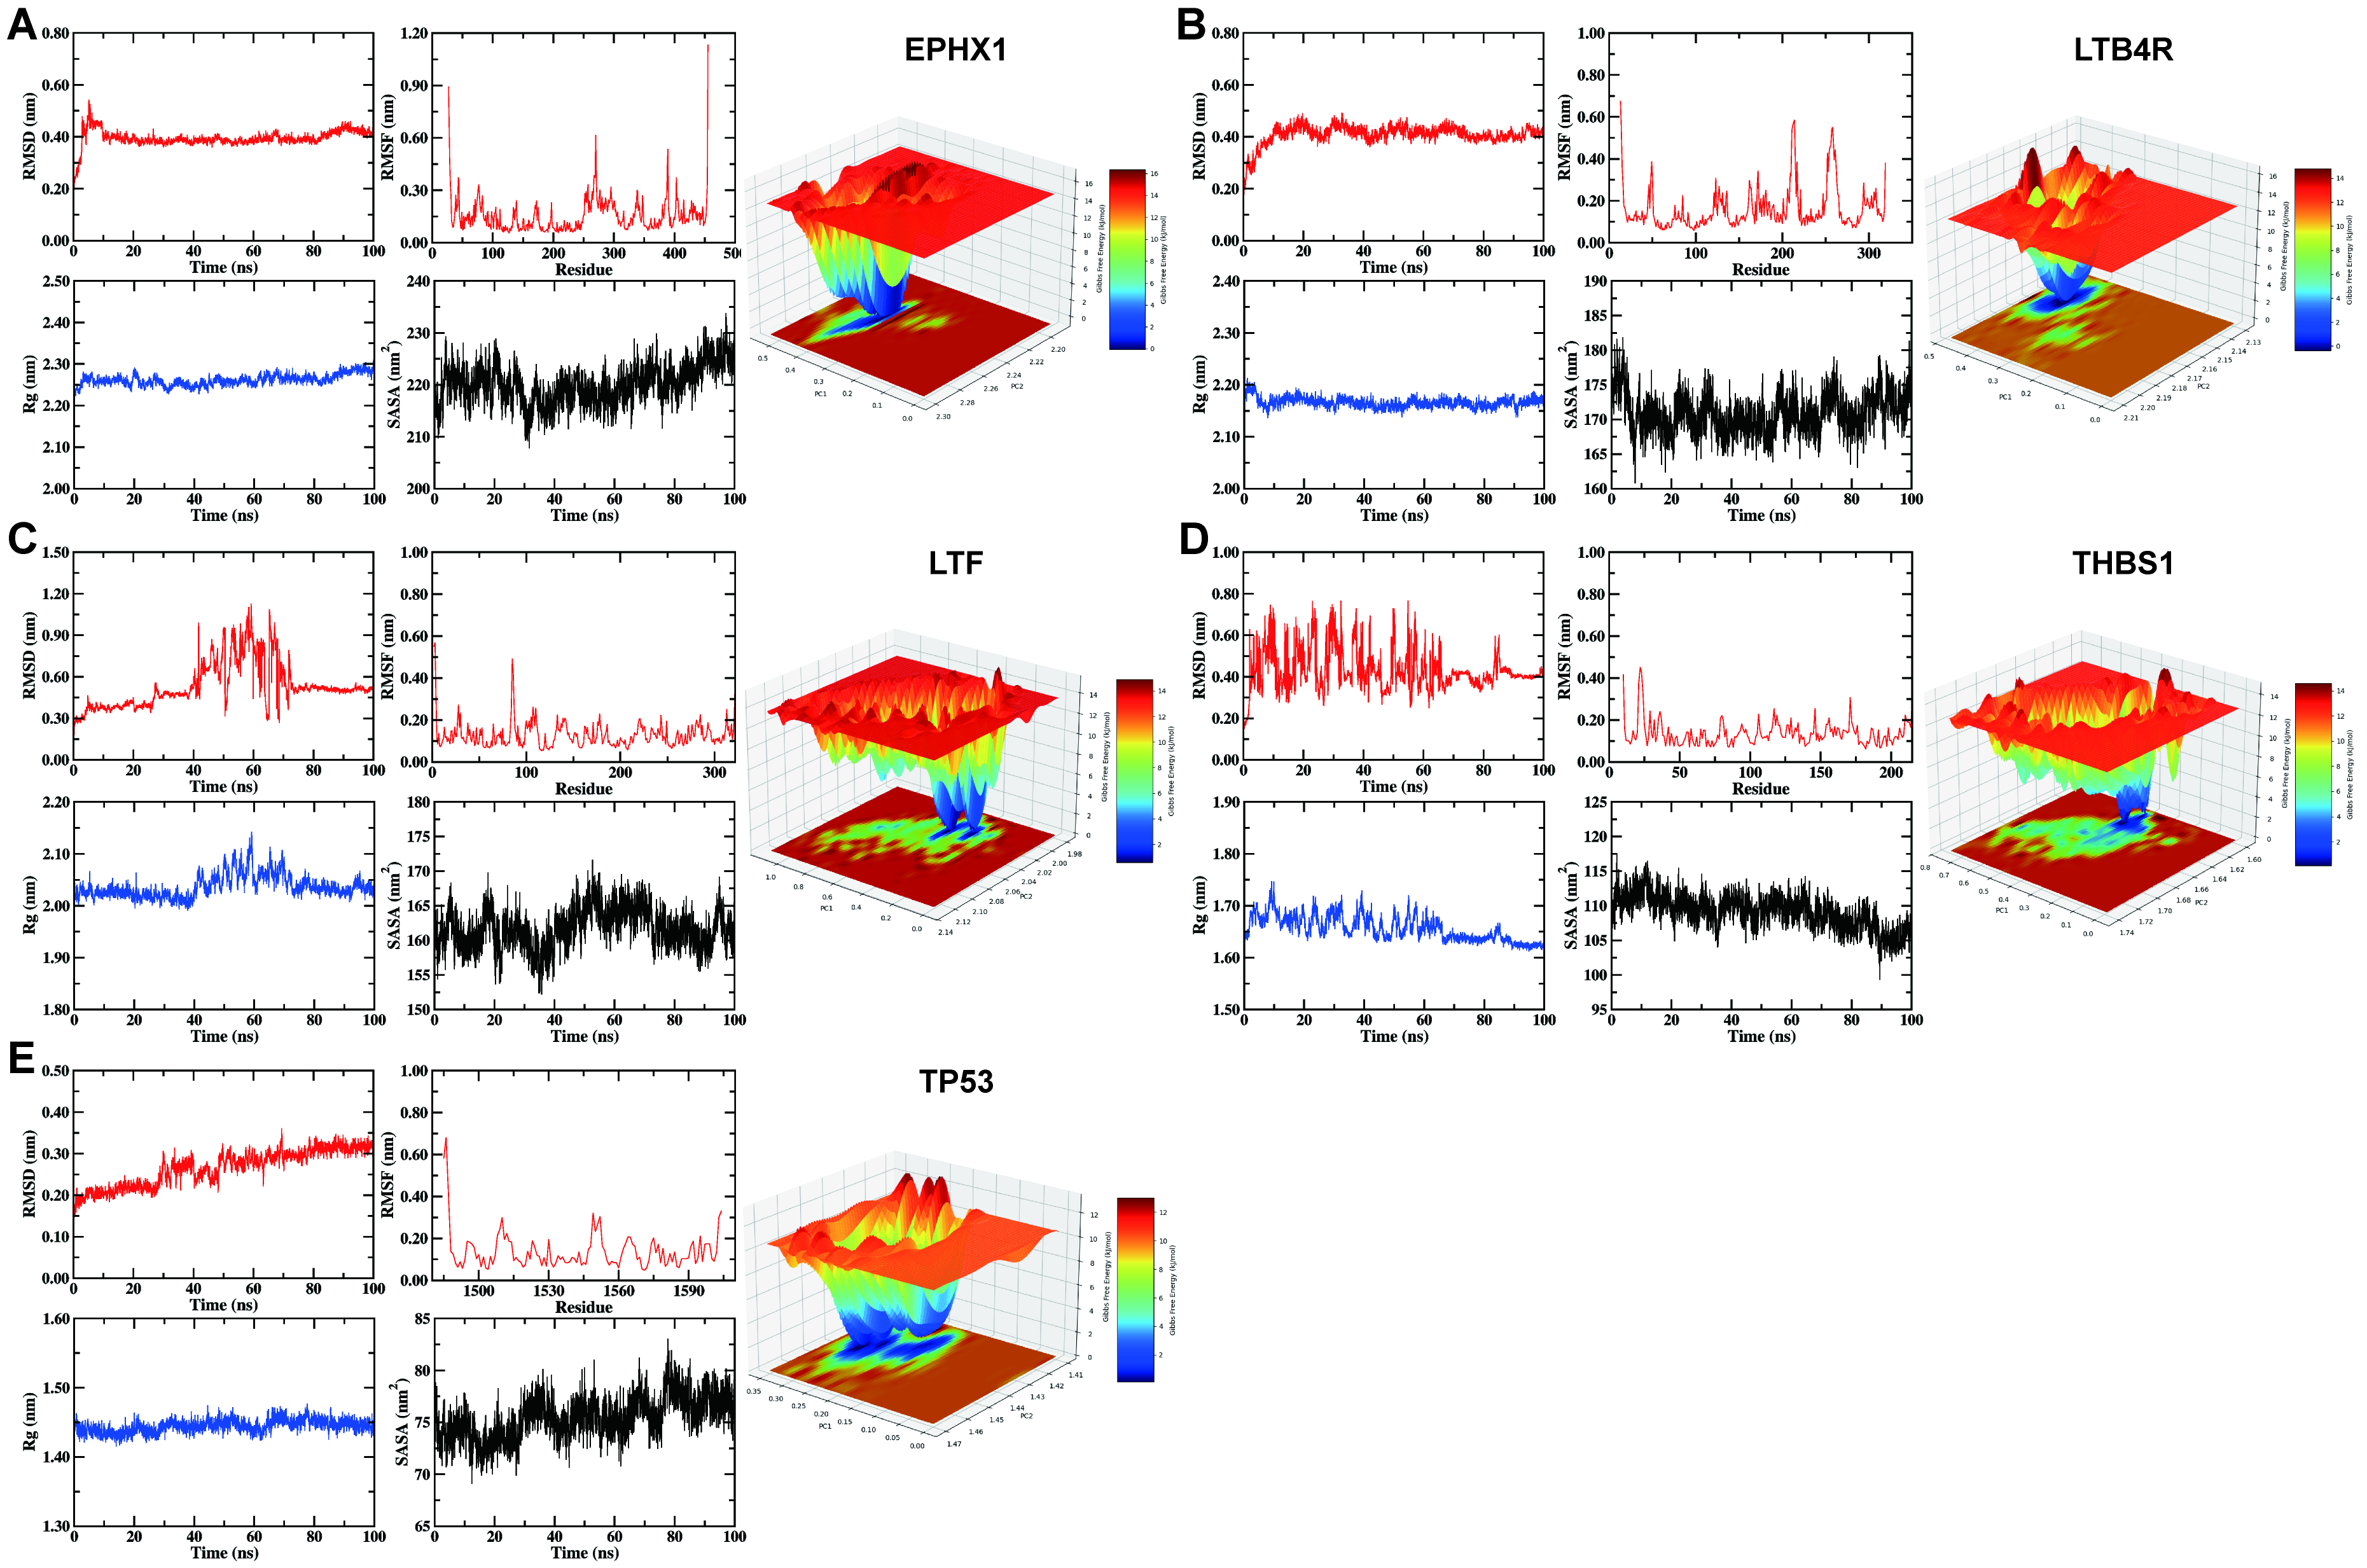
**

**Figure S2. Molecular dynamics simulations of COPD core targets were conducted.** Plots of RMSD, RMSF, Rg, SASA, hydrogen bond counts, and Gibbs free energy landscapes for protein-ligand complexes involving 1-NP with EPHX1, LTB4R, LTF, THBS1 and TP53 were presented over time.
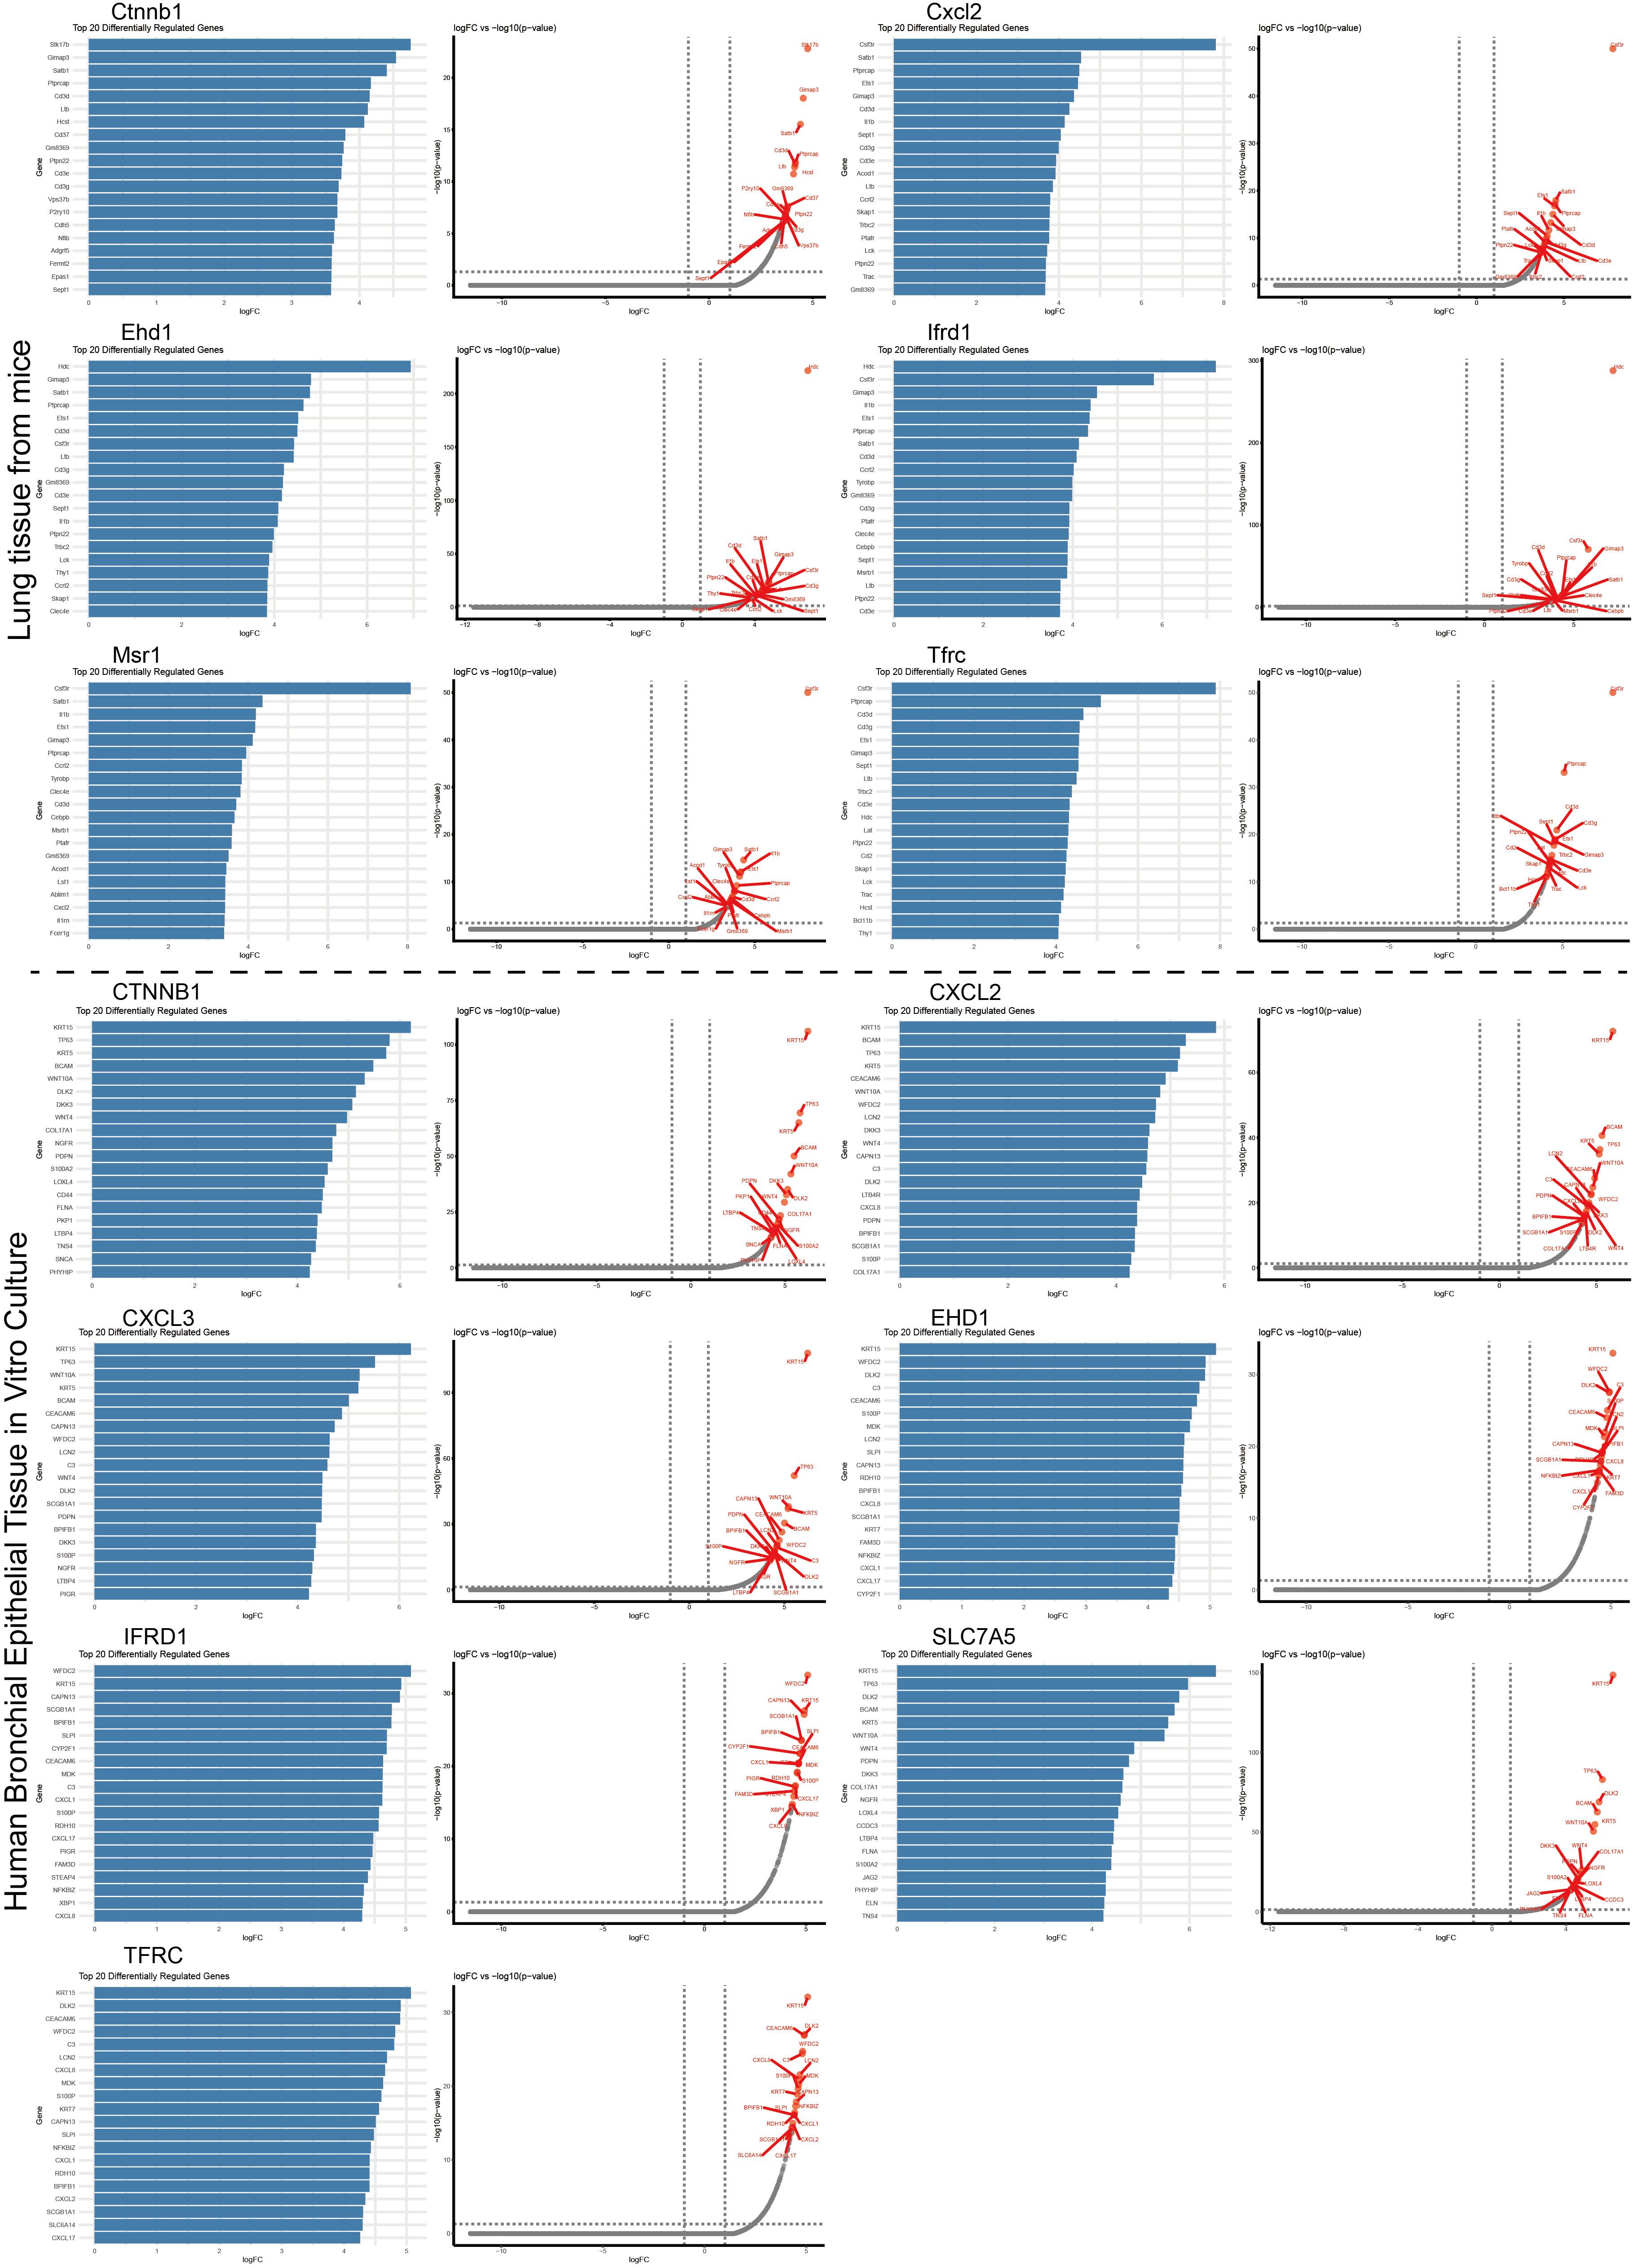


**Figure S3. Single-cell virtual knockout analysis of key core genes in asthma exacerbation.** The upper panel displays the top 30 disrupted genes following virtual cell knockout analysis of six core genes in non-lung tissues from severe asthma mice. The lower panel displays the top 30 disrupted genes per core gene following knockout in human bronchial tissue cultured ex vivo.


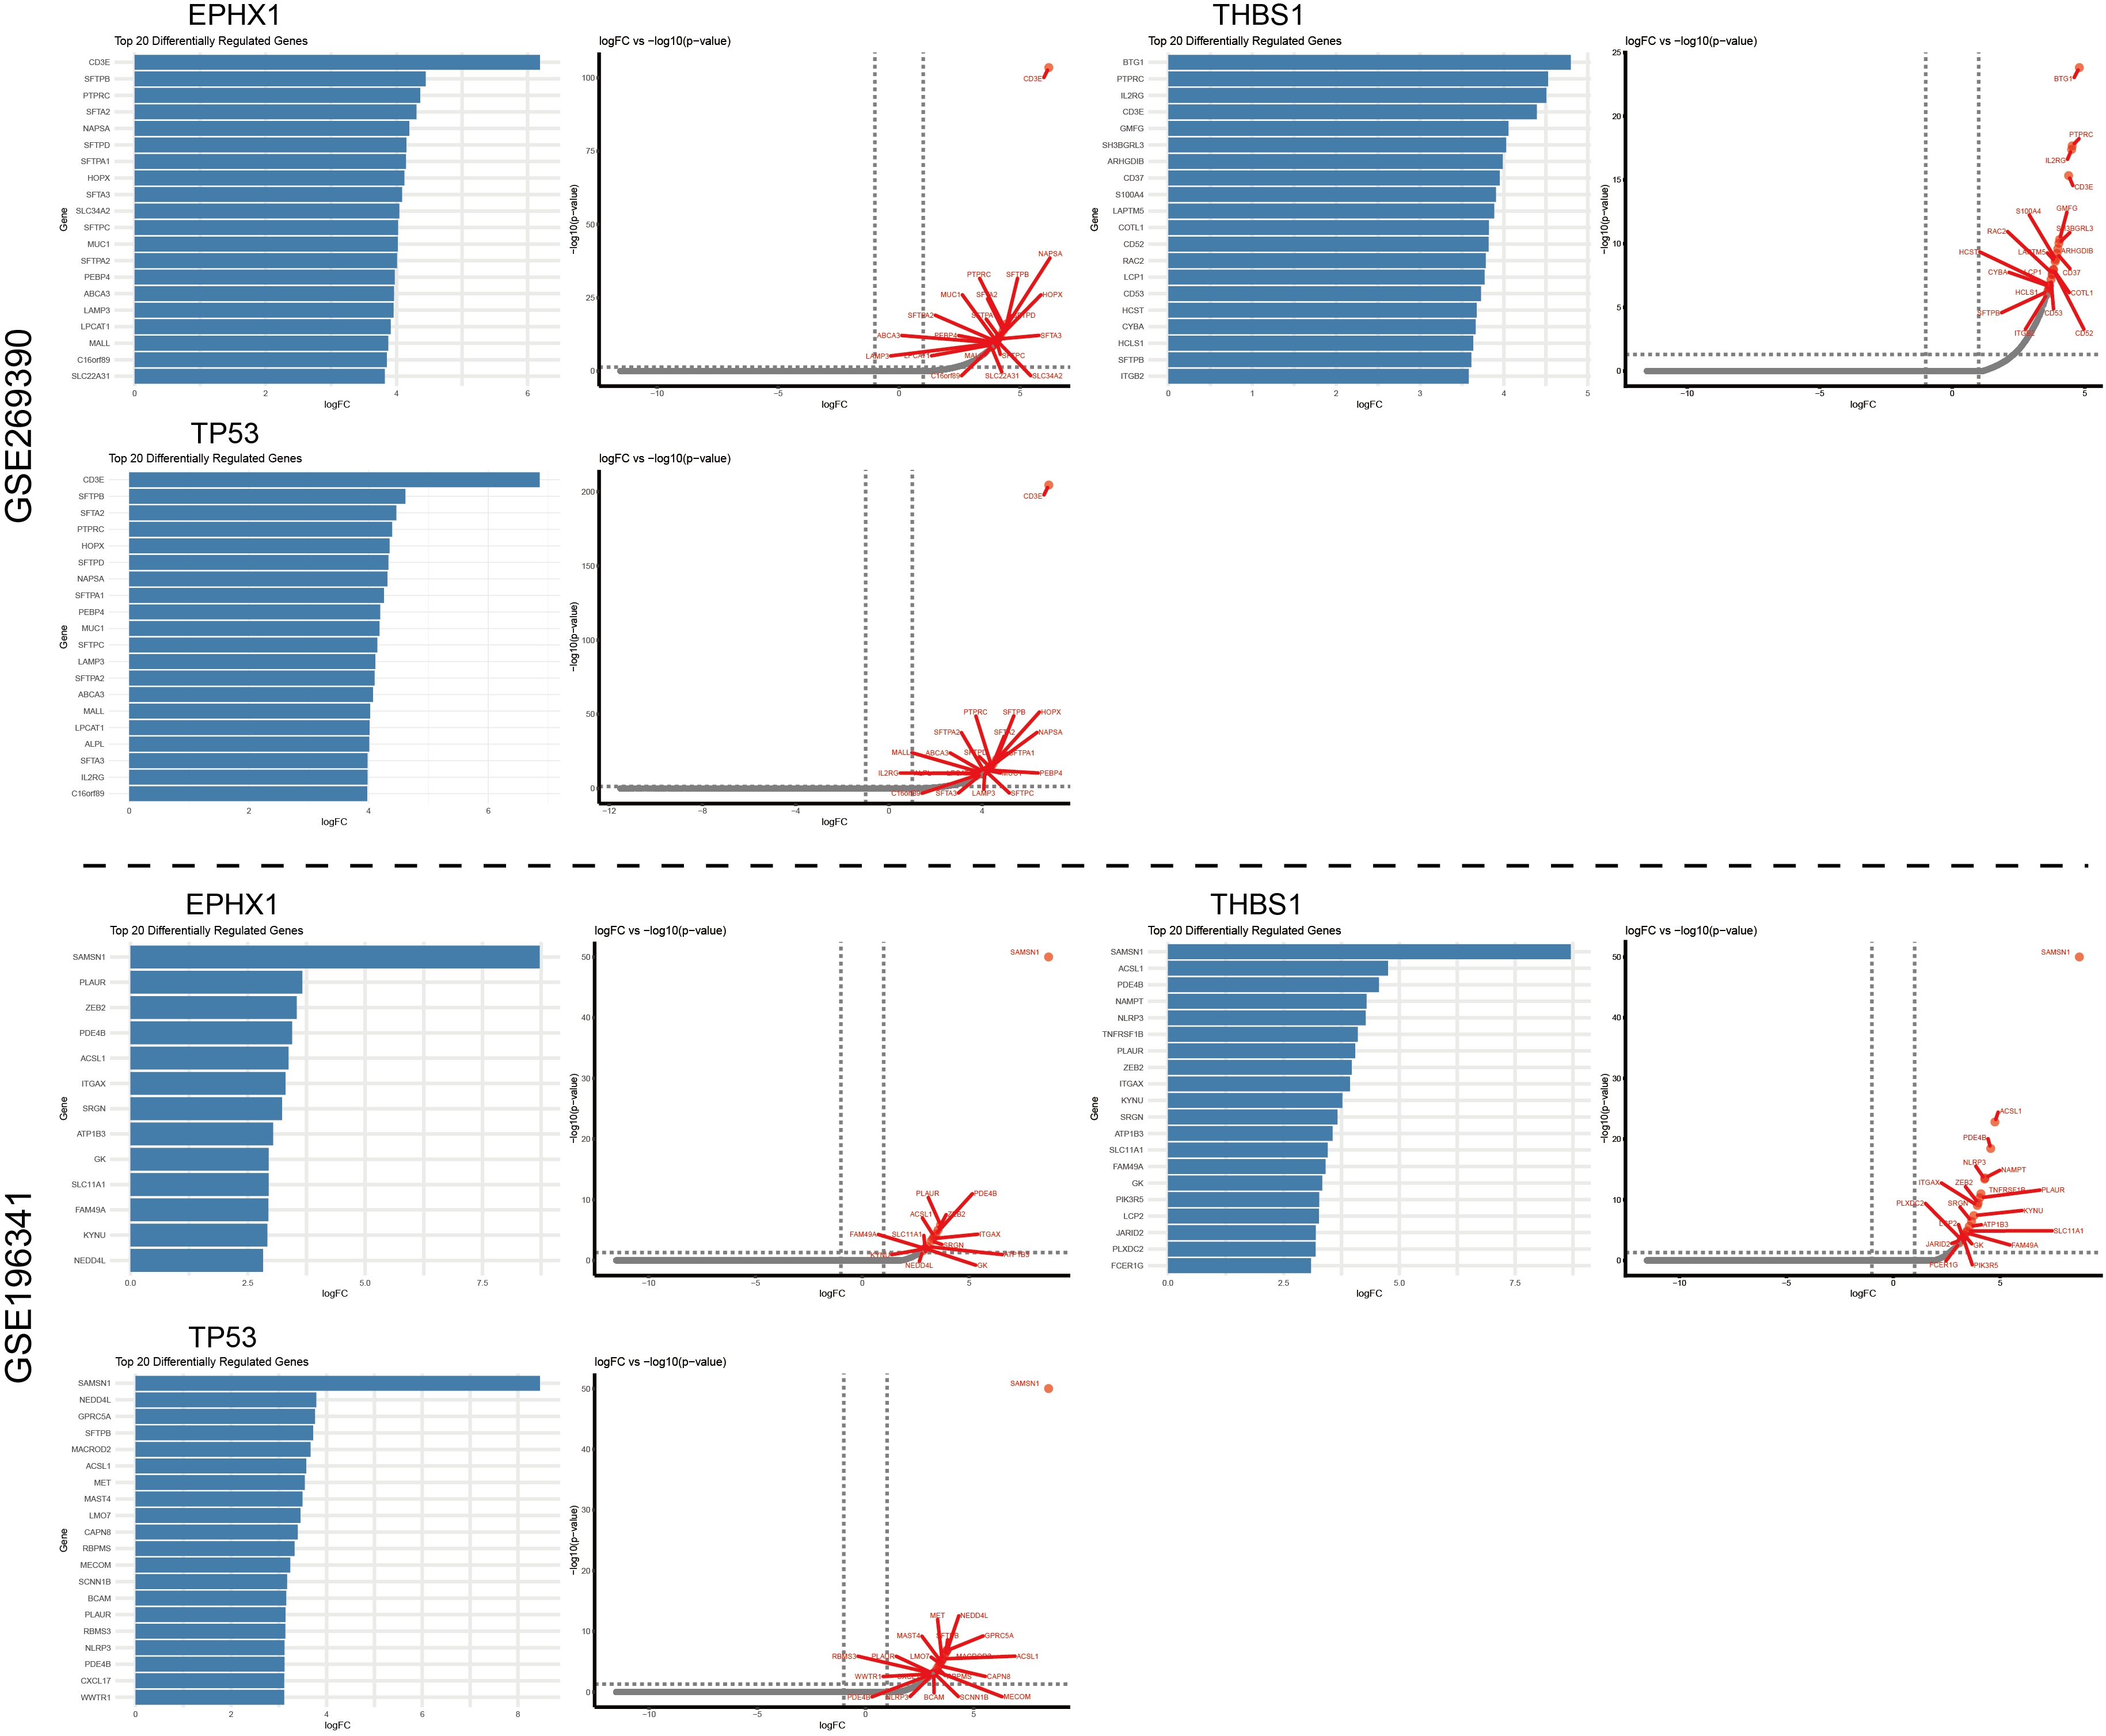


**Figure S4. Single-cell virtual knockout analysis of key core genes in severe COPD.** The two datasets show the top 30 genes disrupted following single-cell virtual knockout analysis of three key genes.
