# Supplementary material
Source: Research Square preprint supplement (doi:10.21203/rs.3.rs-8819144/v1)
Supplement: Supplementary file 2 [file d2da55a675779a9435a1e216.xlsx]

## Sheet: Contents
Contents
Supplementary Table 1	GO Analysis of Genes at the Intersection of 1-NP and Asthma.
Supplementary Table 2	KEGG Analysis of Genes at the Intersection of 1-NP and Asthma.
Supplementary Table 3	DO Analysis of Genes at the Intersection of 1-NP and Asthma.
Supplementary Table 4	GSE74986 identifies potential targets for asthma exacerbation.
Supplementary Table 5	CIBERSORT deconvolution algorithm evaluates moderate and severe immune cell scores.
Supplementary Table 6	Analysis of the Relationship Between Genes and Immune Cell Infiltration (Asthma).
Supplementary Table 7	GO Analysis of Genes at the Intersection of 1-NP and COPD.
Supplementary Table 8	KEGG Analysis of Genes at the Intersection of 1-NP and COPD.
Supplementary Table 9	DO Analysis of Genes at the Intersection of 1-NP and COPD.
Supplementary Table 10	GSE22148 identifies potential targets for COPD exacerbation.
Supplementary Table 11	CIBERSORT deconvolution algorithm evaluates GOLD I-II and GOLD III-IV immune cell scores.
Supplementary Table 12	Analysis of the Relationship Between Genes and Immune Cell Infiltration (COPD).
Supplementary Table 13	Molecular docking details of 1-NP with core targets associated with asthma and COPD exacerbations.
Supplementary Table 14	Binding Free Energies Values of 14 Protein-Ligand Complexes from MMPBSA Analysis
Supplementary Table 15	Functional enrichment analysis of disrupted genes following core gene knockout in whole mouse lung tissue (screening for entries potentially associated with asthma).
Supplementary Table 16	Functional enrichment analysis of genes affected by core gene knockout in human bronchiolar tissue in vitro culture (items potentially associated with asthma).
Supplementary Table 17	Gene functional enrichment analysis of core gene knockout effects in distal lung tissue during advanced COPD (items potentially associated with COPD).
Supplementary Table 18	Asthma_stressor_event_links
Supplementary Table 19	Asthma_event_event_links
Supplementary Table 20	COPD_stressor_event_links
Supplementary Table 21	COPD_event_event_links

## Sheet: Supplementary Table 1
Supplementary Table 1. Genome Ontology Analysis of Genes at the Intersection of 1-NP and Asthma.
ID	Description	GeneRatio	BgRatio	pvalue	p.adjust	qvalue	geneID	Count	ONTOLOGY
GO:0032496	response to lipopolysaccharide	129/1159	339/18903	7.79651e-69	4.76e-65	1.68897e-65	TNF/IL12B/IRAK3/CXCL8/TGFB1/CCL5/CD14/TLR4/IL6/GSTP1/IL1B/TLR2/IL18/CSF2/LTA/NOS2/VCAM1/CCL2/PTGS2/NOD2/TLR9/CCR5/IL1A/NOS3/SERPINE1/NOS1/NLRP3/CD86/ARG1/CXCL10/MIF/CSF1/CD80/CX3CR1/SELE/SLC11A1/HMGB1/NFKBIA/LYN/TNFSF4/HDAC2/CASP8/NFKB1/LTF/PRKCA/CXCL1/MAPK14/IDO1/BTK/CCR7/RHOA/MAPK3/F2R/CXCL5/CASP3/IRAK1/OPRM1/CEBPB/PDE4B/FOS/SRC/CASP1/SOD2/BMP6/MAPK1/CX3CL1/JAK2/THBD/CYP27B1/ADAM17/PLCG2/CYP1A1…	129	BP
GO:0002237	response to molecule of bacterial origin	131/1159	360/18903	4.00104e-67	1.22e-63	4.33376e-64	TNF/IL12B/IRAK3/CXCL8/TGFB1/CCL5/CD14/TLR4/IL6/GSTP1/IL1B/TLR2/IL18/CSF2/LTA/NOS2/VCAM1/CCL2/PTGS2/NOD2/TLR9/CCR5/IL1A/NOS3/SERPINE1/NOS1/NLRP3/CD86/ARG1/CXCL10/MIF/C5AR1/TLR1/CSF1/CD80/CX3CR1/SELE/SLC11A1/HMGB1/NFKBIA/LYN/TNFSF4/HDAC2/CASP8/NFKB1/LTF/PRKCA/CXCL1/MAPK14/IDO1/BTK/CCR7/RHOA/MAPK3/F2R/CXCL5/CASP3/IRAK1/OPRM1/CEBPB/PDE4B/FOS/SRC/CASP1/SOD2/BMP6/MAPK1/CX3CL1/JAK2/THBD/CYP27B1/ADAM17/P…	131	BP
GO:0019221	cytokine-mediated signaling pathway	147/1159	496/18903	7.97292e-62	1.62e-58	5.75729e-59	TNF/IL12B/IL4R/IRAK3/CXCL8/CCL5/IL6/IL33/GSTP1/IL1B/IL18/CSF2/CCL2/CCL17/JAK1/CCL24/CCL26/IL6R/IL1RN/CCR5/IL1A/IL17F/IL1R1/IRF1/CCL22/ARG1/CCR4/CXCL10/CSF1/IL12RB1/PPARG/CX3CR1/IFNGR2/F2RL1/STAT1/NFKBIA/LYN/CXCR1/CASP8/CCR2/CXCR2/ANGPT1/CXCL12/CXCL1/CCR6/CXCR4/CCR8/CCR7/TNFRSF4/MAPK3/CXCL5/TNFSF13B/CCR1/CHUK/IRAK1/SRC/CCL19/CASP1/TNFRSF1A/FAS/CX3CL1/JAK2/CCL20/ADAM17/MAVS/FOXO3/JAK3/IKBKB/TRAF6/A…	147	BP
GO:0032103	positive regulation of response to external stimulus	136/1159	464/18903	1.78019e-56	2.72e-53	9.64115e-54	TNF/IL12B/IL4/PLA2G7/CXCL8/TGFB1/CCL5/CD14/TLR4/IL6/IL33/IL1B/TLR2/IL18/LTA/PTGS2/CCL24/NOD2/SMAD3/CCL26/IL6R/TLR9/MBL2/IL17F/NOD1/SERPINE1/NLRP3/ARG1/CCR4/CXCL10/MIF/C5AR1/C3/CSF1/CX3CR1/TLR3/CREBBP/F2RL1/HMGB1/NFKBIA/LYN/TNFSF4/CCR2/CXCR2/CXCL12/PRKCA/CCR6/CXCR4/IDO1/BTK/CCR7/MMP8/MAPK3/PLA2G2A/VEGFA/HSP90AA1/CCR1/FYN/OPRM1/CLEC7A/CEBPB/SRC/CCL19/CASP1/BMP6/TNFRSF1A/MAPK1/CX3CL1/JAK2/FGFR1/THBD…	136	BP
GO:0001819	positive regulation of cytokine production	137/1159	486/18903	1.27429e-54	1.56e-51	5.52101e-52	TNF/IL12B/IL4R/IL4/IRAK3/TGFB1/CD14/TLR4/IL6/IL33/IL1B/TLR2/IL18/CSF2/LTA/NOS2/PTGS2/NOD2/SMAD3/IL6R/TLR9/IL1A/IL17F/NOD1/SERPINE1/IL1R1/IRF1/HMOX1/NLRP3/CD86/MIF/C5AR1/C3/TLR1/IL12RB1/CD80/PDE4D/TLR3/F2RL1/STAT1/SLC11A1/HMGB1/TNFSF4/HDAC2/CASP8/CCR2/MAPK14/IDO1/TLR5/BTK/CCR7/TNFRSF8/MMP8/F2R/HSP90AA1/CHUK/IRAK1/CLEC7A/CEBPB/PDE4B/SRC/CCL19/CASP1/SOD1/RORA/CX3CL1/JAK2/ADAM17/PLCG2/CYBB/MAVS/ABCC8…	137	BP
GO:0009410	response to xenobiotic stimulus	127/1159	432/18903	7.29786e-53	7.42e-50	2.63491e-50	TNF/GSTM1/GSTP1/IL1B/LTA/NOS2/PTGS2/NOS1/HMOX1/TRPA1/ARG1/NFE2L2/JUN/EPHX1/NQO1/TLR3/ITGB3/STAT1/LYN/HDAC2/CREB1/MMP2/ABCB1/CDH1/CYP3A4/CXCR4/AHR/CYP1A2/RHOA/LCK/HSP90AA1/CD38/CASP3/PDE4B/FOS/SRC/HSD11B2/SOD2/SOD1/KCNJ11/PTCH1/RORA/CTNNB1/ADAM17/CYBB/CYP1A1/GSTA1/ABCC8/FOXO3/RORC/ABCC1/CCND1/TFRC/TP53/GPX1/NAT1/GSTO1/COL1A1/PRKAA2/SULT1A1/ADCYAP1R1/CYP1B1/MYC/CYP2C9/TGFA/BECN1/UGT1A6/ABL1/CYP26A1…	127	BP
GO:0043410	positive regulation of MAPK cascade	136/1159	496/18903	1.23084e-52	1.07e-49	3.80913e-50	ADRB2/TNF/TGFB1/CCL5/TLR4/IL6/IL1B/ICAM1/CCL2/CCL17/CCL24/NOD2/CCL26/TLR9/IL1A/NOD1/ALOX15/CCL22/MIF/C5AR1/JUN/TLR3/F2RL1/ITGB3/HMGB1/EGFR/ANGPT1/PRKCA/XDH/ADORA1/CCR7/FLT1/CCN2/MMP8/MAPK3/PLA2G2A/F2R/VEGFA/CCR1/IRAK1/OPRM1/AR/SRC/CCL19/TGFBR1/SOD1/CX3CL1/JAK2/FGFR1/CTNNB1/CCL20/PLCG2/TRAF6/PTEN/CASR/ERBB2/NOTCH1/ERBB4/BMP2/FPR2/KDR/CD44/NRG1/CCL21/XIAP/RIPK2/TGFA/FGG/ARRB1/MAP3K5/CSF1R/DKK1/PTPR…	136	BP
GO:0071216	cellular response to biotic stimulus	96/1159	261/18903	1.20366e-49	9.18e-47	3.25939e-47	TNF/IL12B/CXCL8/TGFB1/CCL5/CD14/TLR4/IL6/GSTP1/IL1B/TLR2/IL18/CSF2/NOS2/CCL2/NOD2/TLR9/CCR5/IL1A/NOS3/SERPINE1/NLRP3/CD86/ARG1/CXCL10/MIF/TLR1/CD80/CX3CR1/HMGB1/NFKBIA/LYN/TNFSF4/NFKB1/LTF/PRKCA/CXCL1/MAPK14/BTK/RHOA/MAPK3/CXCL5/IRAK1/CLEC7A/CEBPB/PDE4B/SRC/CASP1/BMP6/MAPK1/CX3CL1/JAK2/PLCG2/TRAF6/TP53/IL37/NOTCH1/DDIT3/ABCA1/MAPK8/NR1D1/EDNRB/MALT1/RIPK2/AKT1/MRC1/CD274/IL36RN/CXCL13/RELA/LY96/C…	96	BP
GO:0060326	cell chemotaxis	105/1159	319/18903	6.64413e-49	4.51e-46	1.59925e-46	ALOX5/IL4/PLA2G7/CXCL8/CCL5/IL6/IL1B/VCAM1/CCL2/CCL17/CCL24/NOD2/CCL26/IL6R/CCR5/SERPINE1/ITGB2/CCL22/CCR4/CXCL10/MIF/C5AR1/CSF1/CX3CR1/F2RL1/HMGB1/LYN/CXCR1/CCR2/CXCR2/MMP2/CXCL12/DPP4/CXCL1/CCR6/CXCR4/DUSP1/CCR8/CCR7/FLT1/MAPK3/CXCL5/VEGFA/CCR1/PDE4B/CCL19/MAPK1/CX3CL1/FGFR1/CALCA/CCL20/ADAM17/ABCC1/TREM1/RAC2/NOTCH1/FPR2/GAB1/HSPB1/CXCR5/KDR/EDNRB/CCL21/PRKCQ/AGTR1/S1PR1/CXCL13/CSF1R/KIT/CCL15…	105	BP
GO:0050900	leukocyte migration	117/1159	398/18903	1.11455e-48	6.8e-46	2.41447e-46	TNF/ALOX5/IL4/PLA2G7/CXCL8/CCL5/IL6/IL33/IL1B/ICAM1/VCAM1/CCL2/CCL17/CCL24/NOD2/CCL26/IL6R/CCR5/IL1A/SERPINE1/IL1R1/HMOX1/ITGB2/CCL22/CXCL10/MIF/C5AR1/ITGAL/CSF1/CX3CR1/F2RL1/ITGB3/SELE/SELL/HMGB1/LYN/CXCR1/CCR2/TACR1/CXCR2/MMP2/CXCL12/DPP4/CXCL1/ADORA1/CCR6/CXCR4/DUSP1/ITGB1/CCR7/FLT1/RHOA/MAPK3/SELPLG/CXCL5/VEGFA/LCK/CCR1/FYN/PDE4B/SRC/CCL19/MAPK1/CX3CL1/CALCA/CCL20/ADAM17/TREM1/RAC2/FPR2/CXCR5…	117	BP
GO:0071222	cellular response to lipopolysaccharide	86/1159	222/18903	1.18434e-46	6.57e-44	2.33242e-44	TNF/IL12B/CXCL8/TGFB1/CCL5/CD14/TLR4/IL6/GSTP1/IL1B/TLR2/IL18/CSF2/NOS2/CCL2/NOD2/TLR9/CCR5/IL1A/NOS3/SERPINE1/NLRP3/CD86/ARG1/CXCL10/MIF/CD80/CX3CR1/HMGB1/NFKBIA/LYN/TNFSF4/NFKB1/LTF/PRKCA/CXCL1/MAPK14/RHOA/MAPK3/CXCL5/IRAK1/CEBPB/PDE4B/SRC/CASP1/BMP6/MAPK1/CX3CL1/JAK2/PLCG2/TRAF6/IL37/ABCA1/MAPK8/NR1D1/EDNRB/MALT1/RIPK2/AKT1/MRC1/CD274/IL36RN/CXCL13/RELA/LY96/CXCL2/ABL1/PDCD1LG2/CXCL3/CXCL11/CX…	86	BP
GO:0071219	cellular response to molecule of bacterial origin	87/1159	234/18903	1.76165e-45	8.5e-43	3.0155e-43	TNF/IL12B/CXCL8/TGFB1/CCL5/CD14/TLR4/IL6/GSTP1/IL1B/TLR2/IL18/CSF2/NOS2/CCL2/NOD2/TLR9/CCR5/IL1A/NOS3/SERPINE1/NLRP3/CD86/ARG1/CXCL10/MIF/TLR1/CD80/CX3CR1/HMGB1/NFKBIA/LYN/TNFSF4/NFKB1/LTF/PRKCA/CXCL1/MAPK14/RHOA/MAPK3/CXCL5/IRAK1/CEBPB/PDE4B/SRC/CASP1/BMP6/MAPK1/CX3CL1/JAK2/PLCG2/TRAF6/IL37/ABCA1/MAPK8/NR1D1/EDNRB/MALT1/RIPK2/AKT1/MRC1/CD274/IL36RN/CXCL13/RELA/LY96/CXCL2/ABL1/PDCD1LG2/CXCL3/CXCL…	87	BP
GO:0070482	response to oxygen levels	104/1159	337/18903	1.80959e-45	8.5e-43	3.0155e-43	TNF/TLR2/LTA/NOS2/VCAM1/PTGS2/SMAD3/IL1A/NOS1/HMOX1/EDNRA/NFE2L2/PPARG/CREBBP/HDAC2/MMP2/CXCL12/DPP4/ADORA1/CXCR4/CCN2/RHOA/VEGFA/CD38/CASP3/IRAK1/FOS/SRC/HSD11B2/SOD2/RORA/FAS/MTOR/ADAM17/CYBB/CYP1A1/FOXO3/PTEN/TFRC/TP53/CAV1/CASR/ACVRL1/NOTCH1/EP300/BMP2/HIF1A/ENO1/COL1A1/SIRT1/KCNMB1/MYC/AKT1/PIN1/CBS/ITPR1/BECN1/ITPR2/ATP7A/MDM2/CFLAR/EGR1/STUB1/SLC2A1/MMP14/ATM/PPARA/AQP1/ANG/ATG7/NOX1/PGK1/…	104	BP
GO:0033674	positive regulation of kinase activity	124/1159	496/18903	2.80181e-43	1.22e-40	4.33544e-41	ADRB2/TNF/IL12B/IL4/TGFB1/CCL5/TLR4/IL1B/IL18/NOD2/IL6R/TLR9/CD86/MIF/CSF1/TLR3/ITGB3/SLC11A1/LYN/EGFR/ANGPT1/LTF/ADORA1/CCR7/FLT1/RHOA/VEGFA/HSP90AA1/IRAK1/SRC/CCL19/JAK2/FGFR1/CALCA/MTOR/ADAM17/TRAF6/CCND1/ERBB2/ERBB4/BMP2/KDR/CLU/NRG1/HMGA2/CCL21/P2RY12/SIRT1/LAT/MALT1/TGFA/AKT1/TNFRSF10A/F2/PDPK1/MAP3K5/CSF1R/DKK1/AGT/PTPRC/KIT/NOX4/ABL1/ADRA2A/PRKCD/IGF1R/MAP3K7/PHB1/EGR1/PKD1/TEK/ANG/DDR1/N…	124	BP
GO:0045785	positive regulation of cell adhesion	122/1159	484/18903	5.56398e-43	2.26e-40	8.03556e-41	TNF/ALOX5/IL12B/IL4R/IL4/CCL5/IL6/IL1B/IL18/VCAM1/CCL2/JAK1/NOD2/SMAD3/IL1A/ALOX15/HLA-DQA1/ITGB2/NLRP3/CD86/CSF1/IL12RB1/CD80/ITGB3/SELE/HMGB1/LYN/TNFSF4/CCR2/ANGPT1/CXCL12/DPP4/PRKCA/CCR7/RHOA/VEGFA/LCK/TNFSF13B/FYN/IRAK1/SRC/CCL19/CX3CL1/JAK2/SHH/FOXO3/JAK3/TRAF6/RUNX1/TFRC/CAV1/APOA1/ERBB2/CD209/ICOSLG/KDR/HSPD1/CD44/CCL21/VSIR/PRKCQ/P2RY12/MALT1/RIPK2/AKT1/FGG/LGALS1/HYAL1/TJP1/CD274/CXCL13/…	122	BP
GO:0062197	cellular response to chemical stress	102/1159	345/18903	1.04593e-42	3.99e-40	1.41613e-40	TNF/ALOX5/TLR4/IL6/PTGS2/NOS3/HMOX1/NLRP3/TRPA1/ARG1/EDNRA/NFE2L2/JUN/NQO1/HDAC2/EGFR/MMP2/BTK/PARP1/MAPK3/MMP3/CHUK/FYN/CASP3/FOS/SRC/CASP1/ATP2A2/SOD2/SOD1/FAS/MAPK1/JAK2/CTNNB1/MTOR/G6PD/FOXO3/ABCC1/AKR1C3/TP53/CAV1/GPX1/DDIT3/HSPB1/HIF1A/MAPK8/HSPA1A/PRKAA2/CYP1B1/SIRT1/ETV5/AKT1/AKR1B1/MAP3K5/BECN1/RELA/ATP7A/ABL1/PRKCD/PRDX5/SLC2A1/ATM/AQP1/ATG7/VNN1/NOX1/OXSR1/NCF1/PLEC/TRPM2/PPARGC1A/FABP…	102	BP
GO:0001666	response to hypoxia	94/1159	296/18903	2.56473e-42	9.21e-40	3.26825e-40	TNF/TLR2/LTA/NOS2/VCAM1/PTGS2/SMAD3/IL1A/NOS1/HMOX1/EDNRA/NFE2L2/PPARG/CREBBP/MMP2/CXCL12/DPP4/ADORA1/CXCR4/RHOA/VEGFA/CD38/CASP3/IRAK1/FOS/SRC/HSD11B2/SOD2/RORA/MTOR/ADAM17/CYBB/CYP1A1/FOXO3/PTEN/TFRC/TP53/CAV1/CASR/ACVRL1/NOTCH1/EP300/BMP2/HIF1A/ENO1/SIRT1/KCNMB1/MYC/PIN1/CBS/ITPR1/BECN1/ITPR2/ATP7A/MDM2/CFLAR/EGR1/STUB1/SLC2A1/MMP14/ATM/PPARA/AQP1/ANG/PGK1/HYOU1/THBS1/HSP90B1/SFRP1/FABP1/PLOD1…	94	BP
GO:0036293	response to decreased oxygen levels	96/1159	309/18903	2.7866e-42	9.45e-40	3.3537e-40	TNF/TLR2/LTA/NOS2/VCAM1/PTGS2/SMAD3/IL1A/NOS1/HMOX1/EDNRA/NFE2L2/PPARG/CREBBP/MMP2/CXCL12/DPP4/ADORA1/CXCR4/CCN2/RHOA/VEGFA/CD38/CASP3/IRAK1/FOS/SRC/HSD11B2/SOD2/RORA/MTOR/ADAM17/CYBB/CYP1A1/FOXO3/PTEN/TFRC/TP53/CAV1/CASR/ACVRL1/NOTCH1/EP300/BMP2/HIF1A/ENO1/SIRT1/KCNMB1/MYC/AKT1/PIN1/CBS/ITPR1/BECN1/ITPR2/ATP7A/MDM2/CFLAR/EGR1/STUB1/SLC2A1/MMP14/ATM/PPARA/AQP1/ANG/PGK1/HYOU1/THBS1/HSP90B1/SFRP1/F…	96	BP
GO:0022407	regulation of cell-cell adhesion	120/1159	490/18903	6.7563e-41	2.17e-38	7.70331e-39	TNF/ALOX5/IL12B/IL4R/IL4/TGFB1/CCL5/IL6/IL1B/IL18/VCAM1/CCL2/JAK1/NOD2/IL1RN/IL1A/IRF1/HLA-DQA1/ITGB2/NLRP3/CD86/ARG1/IL12RB1/CD80/SELE/HMGB1/LYN/TNFSF4/CCR2/CXCL12/CDH1/DPP4/PRKCA/MAPK14/IDO1/CCR7/RHOA/VEGFA/LCK/TNFSF13B/FYN/CASP3/IRAK1/CEBPB/SRC/CCL19/PRKG1/BMP6/CX3CL1/JAK2/SHH/FOXO3/JAK3/TRAF6/PTEN/RUNX1/TFRC/CAV1/APOA1/ERBB2/NOTCH1/BMP2/CD209/ICOSLG/HSPD1/CD44/CCL21/VSIR/PRKCQ/MALT1/RIPK2/AKT…	120	BP
GO:0006979	response to oxidative stress	112/1159	434/18903	1.597e-40	4.87e-38	1.7298e-38	TNF/ALOX5/TLR4/IL6/GSTP1/PTGS2/MBL2/IL1A/NOS3/HMOX1/TRPA1/PTGS1/ARG1/EDNRA/NFE2L2/JUN/NQO1/STAT1/HDAC2/EGFR/TACR1/MMP2/BTK/PARP1/MAPK3/MMP3/CD38/CHUK/FYN/CASP3/FOS/SRC/ATP2A2/SOD2/SOD1/MAPK1/JAK2/CTNNB1/G6PD/FOXO3/ABCC1/AKR1C3/TP53/GPX1/HSPB1/HIF1A/MAPK8/COL1A1/GPX4/HSPA1A/PRKAA2/CYP1B1/SIRT1/ETV5/AKT1/HYAL1/MAP3K5/BECN1/PRDX6/RELA/ATP7A/ABL1/PRKCD/PRDX5/MMP14/NEIL1/AQP1/VNN1/NOX1/OXSR1/DUOX1/NCF…	112	BP
GO:0042060	wound healing	113/1159	442/18903	1.86545e-40	5.42e-38	1.92435e-38	TNF/ALOX5/TGFB1/TLR4/IL6/IL33/SMAD3/IL1A/NOS3/SERPINE1/SMAD2/ALOX15/HMOX1/NFE2L2/PPARG/F2RL1/ITGB3/SLC11A1/LYN/PRKCA/MAPK14/CXCR4/ITGB1/RHOA/F2R/VEGFA/LCK/CASP3/OPRM1/CLEC7A/SRC/TGFBR1/PRKG1/CX3CL1/JAK2/SHH/THBD/MTOR/ADAM17/PLCG2/ABCC8/PTEN/CAV1/GPX1/ERBB2/ACVRL1/HSPB1/HIF1A/KDR/COL1A1/CD44/NRG1/PRKCQ/P2RY12/ANXA2/F3/F10/TGFA/FGG/F2/MAP3K5/ADRA2A/PRKCD/CFLAR/FLNA/RAF1/PPARA/AQP1/DDR1/DUOX1/PLEC/H…	113	BP
GO:0070371	ERK1 and ERK2 cascade	98/1159	340/18903	5.49036e-40	1.52e-37	5.4063e-38	TNF/TGFB1/CCL5/TLR4/GSTP1/IL1B/ICAM1/CCL2/CCL17/CCL24/NOD2/CCL26/TLR9/IL1A/NOD1/ALOX15/CCL22/MIF/C5AR1/JUN/F2RL1/ITGB3/HMGB1/LYN/EGFR/ANGPT1/PRKCA/CCR7/CCN2/ACE2/MAPK3/PLA2G2A/F2R/CCR1/OPRM1/SRC/CCL19/MAPK1/CX3CL1/CCL20/PTEN/CASR/ERBB2/NOTCH1/ERBB4/TF/BMP2/FPR2/KDR/CD44/NRG1/CCL21/MYC/RIPK2/FGG/PIN1/ARRB1/CSF1R/AGT/PTPRC/DUSP10/NOX4/CCL15/ABL1/CFLAR/PHB1/TEK/NTRK1/MAP2K1/BMPER/PDGFA/P2RY1/YWHAZ/G…	98	BP
GO:0030595	leukocyte chemotaxis	82/1159	240/18903	1.09214e-39	2.9e-37	1.02866e-37	ALOX5/IL4/PLA2G7/CXCL8/CCL5/IL6/IL1B/CCL2/CCL17/CCL24/NOD2/CCL26/IL6R/CCR5/SERPINE1/ITGB2/CCL22/CXCL10/MIF/C5AR1/CSF1/CX3CR1/F2RL1/HMGB1/LYN/CXCR1/CCR2/CXCR2/MMP2/CXCL12/DPP4/CXCL1/CCR6/CXCR4/DUSP1/CCR7/FLT1/MAPK3/CXCL5/VEGFA/CCR1/PDE4B/CCL19/MAPK1/CX3CL1/CALCA/CCL20/ADAM17/TREM1/RAC2/FPR2/CXCR5/EDNRB/CCL21/S1PR1/CXCL13/CSF1R/KIT/CCL15/CXCL2/CXCL3/CNR2/RAC1/CXCL11/CXCL6/OXSR1/PLEC/THBS1/TRPM2/SLC…	82	BP
GO:0050727	regulation of inflammatory response	108/1159	414/18903	1.4755e-39	3.75e-37	1.33183e-37	TNF/ALOX5/IL12B/IL4/PLA2G7/CCL5/TLR4/IL6/IL33/GSTP1/IL1B/TLR2/IL18/LTA/PTGS2/CCL24/NOD2/SMAD3/TLR9/SERPINE1/IL1R1/ALOX15/NLRP3/C3/PPARG/TLR3/SELE/NFKBIA/LYN/TNFSF4/CCR2/NFKB1/ADORA1/MAPK14/IDO1/BTK/CCR7/ACE2/MMP8/PLA2G2A/MMP3/FYN/CEBPB/SRC/CASP1/SOD1/TNFRSF1A/RORA/GGT1/CX3CL1/JAK2/ESR1/PLCG2/ABCC1/CTSC/IL37/APOA1/GPX1/FPR2/PTGES/NR1D1/GPX4/BIRC3/EDNRB/XIAP/AGTR1/CEBPA/LGALS1/NLRP1/BCL6/AGT/PTPRC/…	108	BP
GO:0007159	leukocyte cell-cell adhesion	107/1159	414/18903	8.62779e-39	2.11e-36	7.47621e-37	TNF/ALOX5/IL12B/IL4R/IL4/CCL5/IL6/IL1B/IL18/ICAM1/VCAM1/CCL2/NOD2/IL1A/IRF1/HLA-DQA1/ITGB2/NLRP3/CD86/ARG1/ITGAL/IL12RB1/CD80/CX3CR1/SELE/SELL/HMGB1/LYN/TNFSF4/CCR2/CXCL12/DPP4/IDO1/ITGB1/CCR7/RHOA/SELPLG/LCK/TNFSF13B/FYN/CASP3/IRAK1/CEBPB/SRC/CCL19/JAK2/SHH/FOXO3/JAK3/TRAF6/PTEN/RUNX1/TFRC/RAC2/CAV1/ERBB2/CD209/ICOSLG/HSPD1/CD44/CCL21/VSIR/PRKCQ/MALT1/RIPK2/AKT1/LGALS1/CD274/BCL6/PTPRC/DUSP10/RE…	107	BP
GO:0070374	positive regulation of ERK1 and ERK2 cascade	78/1159	223/18903	1.25301e-38	2.94e-36	1.044e-36	TNF/TGFB1/CCL5/TLR4/ICAM1/CCL2/CCL17/CCL24/NOD2/CCL26/IL1A/NOD1/ALOX15/CCL22/MIF/C5AR1/JUN/F2RL1/ITGB3/HMGB1/EGFR/ANGPT1/PRKCA/CCR7/CCN2/MAPK3/PLA2G2A/F2R/CCR1/OPRM1/SRC/CCL19/CX3CL1/CCL20/PTEN/CASR/NOTCH1/ERBB4/BMP2/FPR2/KDR/CD44/NRG1/CCL21/RIPK2/FGG/ARRB1/CSF1R/PTPRC/NOX4/CCL15/ABL1/CFLAR/PHB1/TEK/NTRK1/MAP2K1/BMPER/PDGFA/P2RY1/GCG/PDGFRB/RASGRP1/DRD2/ADRA1A/SHC1/FGF4/PTK2B/TPBG/FGF1/GPER1/FFAR…	78	BP
GO:0045860	positive regulation of protein kinase activity	107/1159	420/18903	3.60244e-38	8.14e-36	2.89038e-36	ADRB2/TNF/IL12B/IL4/TGFB1/CCL5/TLR4/IL1B/IL18/NOD2/IL6R/TLR9/CD86/MIF/CSF1/TLR3/ITGB3/SLC11A1/EGFR/ANGPT1/LTF/ADORA1/CCR7/FLT1/RHOA/VEGFA/HSP90AA1/IRAK1/SRC/CCL19/JAK2/FGFR1/CALCA/MTOR/ADAM17/TRAF6/CCND1/ERBB2/ERBB4/BMP2/CLU/NRG1/HMGA2/CCL21/SIRT1/LAT/MALT1/TGFA/AKT1/TNFRSF10A/PDPK1/MAP3K5/CSF1R/DKK1/AGT/PTPRC/KIT/NOX4/ABL1/ADRA2A/PRKCD/MAP3K7/PHB1/EGR1/PKD1/ANG/NCF1/HBEGF/THBS1/CDKN1A/MAP2K1/DAG…	107	BP
GO:0070372	regulation of ERK1 and ERK2 cascade	92/1159	315/18903	4.35425e-38	9.49e-36	3.36882e-36	TNF/TGFB1/CCL5/TLR4/GSTP1/IL1B/ICAM1/CCL2/CCL17/CCL24/NOD2/CCL26/TLR9/IL1A/NOD1/ALOX15/CCL22/MIF/C5AR1/JUN/F2RL1/ITGB3/HMGB1/LYN/EGFR/ANGPT1/PRKCA/CCR7/CCN2/ACE2/MAPK3/PLA2G2A/F2R/CCR1/OPRM1/SRC/CCL19/CX3CL1/CCL20/PTEN/CASR/ERBB2/NOTCH1/ERBB4/BMP2/FPR2/KDR/CD44/NRG1/CCL21/RIPK2/FGG/PIN1/ARRB1/CSF1R/PTPRC/DUSP10/NOX4/CCL15/ABL1/CFLAR/PHB1/TEK/NTRK1/MAP2K1/BMPER/PDGFA/P2RY1/YWHAZ/GCG/PTPN6/PDGFRB/R…	92	BP
GO:0097305	response to alcohol	81/1159	253/18903	7.54433e-37	1.59e-34	5.63566e-35	TNF/TGFB1/CD14/VCAM1/CCR5/SMAD2/NQO1/CRHR1/TNFSF4/HDAC2/CASP8/TACR1/CREB1/CDH1/AHR/CCR7/PARP1/RHOA/FYN/OPRM1/FOS/CCL19/TGFBR1/SOD2/SOD1/PTCH1/CTNNB1/CYBB/G6PD/FOXO3/GNB1/AKR1C3/CCND1/SCNN1A/PRKAA2/CCL21/ADCYAP1R1/CYP1B1/KCNMB1/AKT1/GLB1/ITPR2/CTNNA1/IGF1R/MAOB/PPARA/SCNN1G/OPRK1/HSD3B1/CNR1/DAG1/CTSK/TBXAS1/SFRP1/FOSB/SCNN1B/SGK1/RARA/BCL2L1/CDK4/DRD2/BRCA1/PSMD14/SPHK2/GNAI1/BAK1/RPS6KB1/ST6GAL1…	81	BP
GO:0050673	epithelial cell proliferation	113/1159	481/18903	1.11564e-36	2.27e-34	8.0561e-35	TNF/ALOX5/IL12B/TGFB1/IL6/CCL2/CCL24/NOD2/SMAD3/CCL26/HMOX1/ARG1/C5AR1/JUN/PPARG/ITGB3/STAT1/HMGB1/EGFR/TACR1/CXCL12/PRKCA/XDH/BTK/FLT1/VDR/VEGFA/CEBPB/AR/TGFBR1/BMP6/PTCH1/MAPK1/FGFR1/SHH/TGM1/CTNNB1/ESR1/ADAM17/PTEN/CCND1/CAV1/FUT2/APOA1/GPX1/ERBB2/ACVRL1/NOTCH1/BMP2/BAX/HIF1A/KDR/NR1D1/EDNRB/SIRT1/AGTR1/MYC/F3/TGFA/AKT1/HYAL1/PDPK1/AIMP1/DUSP10/KIT/RPS6KA1/SIX1/ATP7A/CFLAR/PRKDC/MMP14/TEK/NR4A…	113	BP
GO:0043434	response to peptide hormone	105/1159	421/18903	1.42992e-36	2.82e-34	9.99243e-35	IL1B/TLR2/PTGS2/JAK1/LTA4H/ARG1/EDNRA/NFE2L2/PPARG/ITGB3/TRPV1/STAT1/CRHR1/LYN/NFKB1/CREB1/CXCL12/MAPK14/CCN2/PARP1/FOS/SRC/GPT/HSD11B2/ENPP1/JAK2/MTOR/CYBB/ABCC8/JAK3/CAV1/MC4R/GAB1/SCNN1A/COL1A1/NCOA1/PKM/EDNRB/CYP1B1/PRKCQ/SIRT1/AGTR1/AKT1/PDPK1/CRY1/CRY2/AGT/GLP1R/PIK3C2A/RELA/PLCB1/PRKCD/IGF1R/CFLAR/EGR1/PRKDC/KCNQ1/APC/SLC2A1/PPARA/SCNN1G/NR4A1/OPRK1/ALPL/DAG1/CTSK/MEN1/GSK3B/SLC34A1/PTK2/I…	105	BP
GO:0019932	second-messenger-mediated signaling	90/1159	314/18903	1.48101e-36	2.83e-34	1.00261e-34	TNF/CXCL8/NOS2/VCAM1/CCR5/NOS3/NOS1/CCR4/CX3CR1/PDE4D/CHRM3/SELE/CXCR1/CCR2/EGFR/CXCR2/CREB1/CCR6/CXCR4/CCR8/BTK/AHR/CCR7/VEGFA/CCR1/CLEC7A/ATP2A2/PRKG1/NPPA/CCL20/MTOR/PLCG2/FPR2/GSTO1/CXCR5/KDR/RAPGEF3/NRG1/EDNRB/ADCYAP1R1/P2RY12/LAT/AGTR1/CACNA1C/CBS/ITPR1/PDPK1/ITPR2/NMUR2/AGT/PTPRC/NFATC1/GLP1R/ZMPSTE24/NMUR1/PTBP1/AQP1/CDH13/THBS1/TRPM2/BST1/FPR1/GSK3B/SLC8A1/IRGM/GRM5/PDE7A/HINT1/PDE5A/JPT…	90	BP
GO:0070661	leukocyte proliferation	94/1159	348/18903	7.92533e-36	1.47e-33	5.20266e-34	IL12B/IL4/CCL5/TLR4/IL6/IL33/GSTP1/IL1B/IL18/CSF2/VCAM1/TLR9/IL1A/IRF1/CD86/ARG1/MIF/CSF1/IL12RB1/CD80/F2RL1/SLC11A1/HMGB1/LYN/TNFSF4/CCR2/TACR1/IDO1/BTK/AHR/TNFRSF4/MAPK3/TNFSF13B/CD38/FYN/CASP3/CEBPB/CCL19/MAPK1/CX3CL1/JAK2/SHH/CTNNB1/JAK3/TRAF6/PTEN/TFRC/TP53/RAC2/ERBB2/CD209/BAX/ICOSLG/HSPD1/CLU/VSIR/PRKCQ/MS4A1/MALT1/RIPK2/CD274/BCL6/CSF1R/PTPRC/GBA1/KIT/ABL1/CR1/PRKCD/PDCD1LG2/ATM/IFNA2/CDK…	94	BP
GO:0022409	positive regulation of cell-cell adhesion	90/1159	322/18903	1.32246e-35	2.37e-33	8.42609e-34	TNF/ALOX5/IL12B/IL4R/IL4/CCL5/IL6/IL1B/IL18/VCAM1/CCL2/JAK1/NOD2/IL1A/HLA-DQA1/ITGB2/NLRP3/CD86/IL12RB1/CD80/SELE/HMGB1/LYN/TNFSF4/CCR2/DPP4/CCR7/RHOA/LCK/TNFSF13B/FYN/IRAK1/SRC/CCL19/CX3CL1/JAK2/SHH/FOXO3/JAK3/TRAF6/RUNX1/TFRC/CAV1/CD209/ICOSLG/HSPD1/CD44/CCL21/VSIR/PRKCQ/MALT1/RIPK2/AKT1/FGG/LGALS1/TJP1/CD274/CXCL13/BCL6/PTPRC/DUSP10/RELA/ABL1/CR1/PDCD1LG2/VNN1/SMARCA4/IL1RL2/ACTB/SMARCD2/BRD7/…	90	BP
GO:0048545	response to steroid hormone	92/1159	339/18903	2.95086e-35	5.15e-33	1.82643e-33	TNF/TGFB1/IL6/TLR2/NR3C1/PTGS2/IL1RN/ARG1/TACR1/CCN2/PARP1/RHOA/HDAC1/CD38/CASP3/AR/FOS/SRC/HSD11B2/BMP6/JAK2/CPN1/ESR1/CYBB/SPP1/FOXO3/AKR1C3/CCND1/CAV1/NOTCH1/EP300/NR3C2/SCNN1A/NR1D1/COL1A1/HSPA1A/CYP1B1/SIRT1/GLB1/CRY1/CRY2/GBA1/ACVR1/IGF1R/CFLAR/PHB1/MAOB/PPARA/SMYD3/SCNN1G/AQP1/HSPA8/SKP2/SMARCA4/ALPL/EIF4E/HSD3B1/THBS1/RXRB/SFRP1/FOSB/SDC1/PARK7/CASP9/SCNN1B/PCSK1/SGK1/HDAC6/ATP1A1/BCL2L11…	92	BP
GO:0009612	response to mechanical stimulus	72/1159	211/18903	6.52643e-35	1.11e-32	3.92731e-33	TNF/TLR4/IL33/IL1B/PTGS2/IRF1/TRPA1/CXCL10/CSF1/JUN/TLR3/ITGB3/STAT1/NFKBIA/CASP8/NFKB1/TACR1/MMP2/CXCL12/MAPK14/CXCR4/TLR5/TNFRSF8/RHOA/MAPK3/FYN/FOS/SRC/CASP1/BMP6/TNFRSF1A/PTCH1/FAS/NPPA/CTNNB1/MAPK8/COL1A1/BDKRB1/TNFRSF10A/AGT/KIT/RELA/IGF1R/MAP3K1/RAF1/KCNQ1/PKD1/SLC2A1/MMP14/CHEK1/AQP1/PLEC/NTRK1/THBS1/DAG1/BAG3/PTK2/FOSB/SLC8A1/P2RY1/DRD2/CAPN2/ASIC3/PIK3CA/BAK1/RPS6KB1/KCNA1/PTK2B/PIEZO1/…	72	BP
GO:0034599	cellular response to oxidative stress	84/1159	288/18903	8.68044e-35	1.43e-32	5.08232e-33	TNF/ALOX5/TLR4/IL6/NOS3/HMOX1/TRPA1/ARG1/EDNRA/NFE2L2/JUN/NQO1/HDAC2/EGFR/MMP2/BTK/PARP1/MAPK3/MMP3/CHUK/FYN/FOS/SRC/ATP2A2/SOD2/SOD1/MAPK1/JAK2/CTNNB1/G6PD/FOXO3/ABCC1/AKR1C3/TP53/GPX1/HSPB1/HIF1A/MAPK8/HSPA1A/PRKAA2/CYP1B1/SIRT1/ETV5/AKT1/MAP3K5/BECN1/RELA/ATP7A/ABL1/PRKCD/PRDX5/AQP1/VNN1/NOX1/NCF1/TRPM2/PPARGC1A/FABP1/PARK7/PRDX1/APEX1/MGST1/ARNT/PRDX2/HDAC6/RIPK1/TPM1/LRRK2/SLC7A11/EPAS1/SIGM…	84	BP
GO:0006816	calcium ion transport	105/1159	440/18903	9.56813e-35	1.54e-32	5.45463e-33	CYSLTR1/CCL5/CCL2/PTGS2/TLR9/CCR5/NOS3/NOS1/TRPA1/CXCL10/EDNRA/PDE4D/ITGB3/TRPV1/CRHR1/LYN/CXCL12/CXCR4/CCR7/CCN2/VDR/RHOA/F2R/LCK/CCR1/FYN/OPRM1/PDE4B/CCL19/ATP2A2/NPPA/CX3CL1/CTNNB1/CYP27B1/PLCG2/G6PD/JAK3/CAV1/CASR/ORAI1/DDIT3/BAX/GSTO1/FBXO11/EDNRB/CCL21/ADCYAP1R1/ANXA2/MS4A1/BDKRB1/CACNA1C/F2/ITPR1/PDPK1/ITPR2/NMUR2/ATP2A3/AGT/PTPRC/RAMP1/ABL1/ZMPSTE24/ADRA2A/NMUR1/FLNA/VDAC1/PKD1/CXCL11/TRP…	105	BP
GO:1901653	cellular response to peptide	96/1159	373/18903	1.09331e-34	1.71e-32	6.07293e-33	ADRB2/TNF/TLR4/IL1B/ICAM1/VCAM1/JAK1/NOD2/NOD1/ARG1/EDNRA/NFE2L2/PPARG/ITGB3/STAT1/CRHR1/LYN/NFKB1/PARP1/FYN/FOS/SRC/GPT/ENPP1/JAK2/FOXO3/ABCC1/JAK3/TP53/CAV1/CASR/FPR2/ANO1/GAB1/SCNN1A/LRP1/NCOA1/PKM/CYP1B1/PRKCQ/SIRT1/AGTR1/RIPK2/AKT1/PDPK1/GJA1/AGT/GLP1R/PIK3C2A/RELA/MDM2/PLCB1/PRKCD/IGF1R/CFLAR/PRKDC/APC/SCNN1G/NR4A1/CASP4/MEN1/GSK3B/PTK2/INSR/GRM5/SCNN1B/APEX1/PIK3R1/CCNA2/CDK4/CACNA2D1/BCL2…	96	BP
GO:1903037	regulation of leukocyte cell-cell adhesion	96/1159	377/18903	2.8207e-34	4.3e-32	1.52763e-32	TNF/ALOX5/IL12B/IL4R/IL4/CCL5/IL6/IL1B/IL18/VCAM1/CCL2/NOD2/IL1A/IRF1/HLA-DQA1/ITGB2/NLRP3/CD86/ARG1/IL12RB1/CD80/SELE/HMGB1/LYN/TNFSF4/CCR2/CXCL12/DPP4/IDO1/CCR7/RHOA/LCK/TNFSF13B/FYN/CASP3/IRAK1/CEBPB/SRC/CCL19/JAK2/SHH/FOXO3/JAK3/TRAF6/PTEN/RUNX1/TFRC/CAV1/ERBB2/CD209/ICOSLG/HSPD1/CD44/CCL21/VSIR/PRKCQ/MALT1/RIPK2/AKT1/LGALS1/CD274/BCL6/PTPRC/DUSP10/RELA/ABL1/CR1/PDCD1LG2/PPARA/IFNA2/VNN1/SMAR…	96	BP
GO:0033002	muscle cell proliferation	77/1159	247/18903	3.61187e-34	5.38e-32	1.9084e-32	TNF/IL12B/TGFB1/CCL5/TLR4/IL6/IL18/PTGS2/IL6R/NOS3/HMOX1/JUN/PPARG/ITGB3/STAT1/TACR1/MMP2/ANGPT1/MAPK14/ACE2/RHOA/HDAC1/IRAK1/FOS/SRC/TGFBR1/SOD2/PRKG1/CX3CL1/JAK2/SHH/CTNNB1/PTEN/RUNX1/NOTCH1/ERBB4/DDIT3/BMP2/IRAK4/AKT1/S1PR1/MAP3K5/GJA1/AGT/SIX1/ABL1/IGF1R/CFLAR/PHB1/PRKDC/ADAMTS1/ANG/CDH13/NOX1/HBEGF/THBS1/CDKN1A/PPARGC1A/RBP4/PDGFRB/DNMT1/FOXC2/TPM1/PIK3CA/RPS6KB1/NR4A3/EPHB1/TCF7L2/EREG/HPGD…	77	BP
GO:0000302	response to reactive oxygen species	70/1159	204/18903	3.80244e-34	5.47e-32	1.94201e-32	IL6/GSTP1/IL1A/NOS3/HMOX1/TRPA1/ARG1/NFE2L2/JUN/NQO1/STAT1/HDAC2/EGFR/TACR1/MMP2/BTK/MAPK3/CHUK/FYN/CASP3/FOS/SRC/SOD2/SOD1/MAPK1/FOXO3/AKR1C3/GPX1/HIF1A/MAPK8/COL1A1/CYP1B1/SIRT1/AKT1/HYAL1/MAP3K5/BECN1/RELA/ATP7A/ABL1/PRKCD/PRDX5/AQP1/NCF1/TRPM2/FABP1/SLC8A1/SDC1/PARK7/PRDX1/APEX1/PDGFRB/PRDX2/HDAC6/RIPK1/TPM1/CAPN2/LRRK2/BAK1/SIGMAR1/PYCR1/PTK2B/NR4A3/MAPT/PRKAA1/TRAP1/SPHK1/MAP1LC3A/CDK1/GPR37	70	BP
GO:0071214	cellular response to abiotic stimulus	90/1159	335/18903	3.94441e-34	5.47e-32	1.94201e-32	TLR4/IL33/IL1B/PTGS2/IRF1/NLRP3/TLR3/CREBBP/ITGB3/TRPV1/MMP1/CASP8/NFKB1/MMP2/MAPK14/TLR5/MME/TNFRSF8/PARP1/MAPK3/MMP3/CASP3/CASP1/BMP6/TNFRSF1A/FAS/LIG4/MTOR/PTEN/TP53/EP300/BAX/MAPK8/SCNN1A/COL1A1/SIRT1/MYC/HYAL1/AKR1B1/TNFRSF10A/CRY1/CRY2/AGT/ZMPSTE24/MC1R/MDM2/PRKCD/IGF1R/EGR1/MAP3K1/GRM1/SLC2A1/ATM/CHEK1/SCNN1G/AQP1/NOX1/OXSR1/PLEC/CDKN1A/DAG1/BAG3/SFRP1/EEF1D/ASIC1/CASP9/SCNN1B/ERCC1/BCL2L1…	90	BP
GO:0104004	cellular response to environmental stimulus	90/1159	335/18903	3.94441e-34	5.47e-32	1.94201e-32	TLR4/IL33/IL1B/PTGS2/IRF1/NLRP3/TLR3/CREBBP/ITGB3/TRPV1/MMP1/CASP8/NFKB1/MMP2/MAPK14/TLR5/MME/TNFRSF8/PARP1/MAPK3/MMP3/CASP3/CASP1/BMP6/TNFRSF1A/FAS/LIG4/MTOR/PTEN/TP53/EP300/BAX/MAPK8/SCNN1A/COL1A1/SIRT1/MYC/HYAL1/AKR1B1/TNFRSF10A/CRY1/CRY2/AGT/ZMPSTE24/MC1R/MDM2/PRKCD/IGF1R/EGR1/MAP3K1/GRM1/SLC2A1/ATM/CHEK1/SCNN1G/AQP1/NOX1/OXSR1/PLEC/CDKN1A/DAG1/BAG3/SFRP1/EEF1D/ASIC1/CASP9/SCNN1B/ERCC1/BCL2L1…	90	BP
GO:1903039	positive regulation of leukocyte cell-cell adhesion	81/1159	275/18903	6.50258e-34	8.82e-32	3.13037e-32	TNF/ALOX5/IL12B/IL4R/IL4/CCL5/IL6/IL1B/IL18/VCAM1/CCL2/NOD2/IL1A/HLA-DQA1/ITGB2/NLRP3/CD86/IL12RB1/CD80/SELE/HMGB1/LYN/TNFSF4/CCR2/DPP4/CCR7/RHOA/LCK/TNFSF13B/FYN/IRAK1/SRC/CCL19/JAK2/SHH/FOXO3/JAK3/TRAF6/RUNX1/TFRC/CAV1/CD209/ICOSLG/HSPD1/CD44/CCL21/VSIR/PRKCQ/MALT1/RIPK2/AKT1/LGALS1/CD274/BCL6/PTPRC/DUSP10/RELA/ABL1/CR1/PDCD1LG2/VNN1/SMARCA4/IL1RL2/ACTB/SMARCD2/BRD7/PTPN6/RARA/CD81/RASGRP1/LEF1…	81	BP
GO:0003018	vascular process in circulatory system	80/1159	270/18903	1.04402e-33	1.39e-31	4.91667e-32	ADRB2/TNF/CYSLTR1/TGFB1/PTGS2/NOS3/NOS1/EDNRA/CHRM3/F2RL1/TACR1/CXCR2/MMP2/ANGPT1/ABCB1/ADORA1/ACE2/RHOA/F2R/VEGFA/CD38/SRC/SOD2/SOD1/PRKG1/BMP6/NPPA/CALCA/ABCC8/ABCC1/TFRC/CAV1/CASR/GPX1/LRP1/ADRB1/EDNRB/AGTR1/KCNMB1/FGG/TJP1/P2RY2/CBS/ATP2A3/AGT/PIK3C2A/ABL1/ADRA2A/SLC2A1/ECE1/TEK/SLC1A5/PLEC/SLC5A1/SLC12A2/TBXAS1/P2RX1/INSR/SLC8A1/P2RY1/SCNN1B/ABCG2/KCNMA1/FOXC2/SLC16A1/SLC22A1/ADRA1A/AVPR2/RO…	80	BP
GO:0070997	neuron death	94/1159	368/18903	1.08217e-33	1.41e-31	4.98793e-32	TNF/CCL5/TLR4/NR3C1/CCL2/HMOX1/ITGB2/CSF1/JUN/CX3CR1/NQO1/ITGAM/CASP8/ANGPT1/ADORA1/PARP1/RHOA/F2R/FYN/CASP3/CEBPB/FOS/SOD2/SOD1/FAS/CX3CL1/JAK2/LIG4/CTNNB1/G6PD/FOXO3/CCND1/TP53/GPX1/DDIT3/BAX/HIF1A/KDR/CLU/XIAP/SIRT1/AKT1/NLRP1/MAP3K5/DKK1/GBA1/SIX1/ABL1/IKBKG/EGR1/ATM/PPARA/HYOU1/NTRK1/TRPM2/PPARGC1A/BID/GSK3B/THRB/PARK7/CASP9/BCL2L1/BCL2L11/HSPA5/CAPN2/PIK3CA/LRRK2/SLC7A11/KRAS/DHCR24/TBK1/NM…	94	BP
GO:0050863	regulation of T cell activation	95/1159	376/18903	1.25371e-33	1.59e-31	5.6582e-32	IL12B/IL4R/IL4/CCL5/IL6/IL1B/IL18/VCAM1/CCL2/NOD2/IL1A/IRF1/HLA-DQA1/NLRP3/CD86/ARG1/IL12RB1/CD80/HMGB1/LYN/TNFSF4/CCR2/DPP4/IDO1/CCR7/RHOA/LCK/TNFSF13B/FYN/CASP3/CEBPB/SRC/CCL19/SOD1/JAK2/SHH/CTNNB1/FOXO3/JAK3/TRAF6/PTEN/RUNX1/TFRC/RAC2/CAV1/ERBB2/CD209/ICOSLG/HSPD1/CCL21/VSIR/PRKCQ/LAT/MALT1/RIPK2/AKT1/LGALS1/CD274/BCL6/PTPRC/DUSP10/ABL1/CR1/PDCD1LG2/IFNA2/VNN1/SMARCA4/IL1RL2/BID/ACTB/SMARCD2/B…	95	BP
GO:0072593	reactive oxygen species metabolic process	74/1159	235/18903	3.36405e-33	4.13e-31	1.4669e-31	TNF/ALOX5/TGFB1/TLR4/GSTP1/NOS2/NOS3/ITGB2/NFE2L2/NQO1/F2RL1/ITGAM/XDH/MAPK14/CYP1A2/CCN2/ACE2/RHOA/MMP8/MMP3/FYN/CLEC7A/SOD2/SOD1/PLCG2/CYBB/CYP1A1/G6PD/FOXO3/AKR1C3/TP53/RAC2/GPX1/FPR2/HIF1A/CYP1B1/AGTR1/F2/CBS/BECN1/AGT/NOX4/ATP7A/PRKCD/CFLAR/VDAC1/PRDX5/RAC1/MAOB/PPARA/NOX1/DUOX1/NCF1/THBS1/CDKN1A/BST1/PARK7/PRDX1/PDGFRB/PRDX2/HDAC6/RIPK1/BRCA1/CBR1/SPHK2/LRRK2/BIRC2/PTK2B/MAPT/PIKFYVE/TRAP1/…	74	BP
GO:1903131	mononuclear cell differentiation	107/1159	473/18903	3.3857e-33	4.13e-31	1.4669e-31	IL12B/IL4R/IL4/IL6/IL1B/IL18/CSF2/VCAM1/IL6R/TLR9/IL1A/IRF1/NLRP3/CD86/CSF1/IL12RB1/CD80/JUN/PPARG/F2RL1/HMGB1/LYN/TNFSF4/CCR2/CCR6/ITGB1/BTK/CCR7/RHOA/VEGFA/LCK/TNFSF13B/CEBPB/FOS/CCL19/SOD1/RORA/SHH/LIG4/CTNNB1/MTOR/ADAM17/PLCG2/FOXO3/RORC/JAK3/TRAF6/RUNX1/TP53/ERBB2/EP300/BAX/VSIR/MS4A1/MALT1/MYC/RIPK2/LGALS1/BCL6/CSF1R/PTPRC/GBA1/DUSP10/KIT/NFATC1/ATP7A/ABL1/CR1/FNIP1/EGR1/PRKDC/IKZF1/MMP14/A…	107	BP
GO:0097529	myeloid leukocyte migration	75/1159	242/18903	4.10742e-33	4.92e-31	1.7447e-31	IL4/PLA2G7/CXCL8/CCL5/IL6/IL1B/CCL2/CCL17/CCL24/NOD2/CCL26/IL6R/IL1A/SERPINE1/IL1R1/ITGB2/CCL22/CXCL10/MIF/C5AR1/CSF1/CX3CR1/HMGB1/LYN/CXCR1/CCR2/CXCR2/MMP2/CXCL12/DPP4/CXCL1/DUSP1/CCR7/FLT1/MAPK3/CXCL5/VEGFA/CCR1/PDE4B/CCL19/MAPK1/CX3CL1/CALCA/CCL20/TREM1/RAC2/FPR2/IRAK4/EDNRB/CCL21/P2RY12/CXCL13/CSF1R/KIT/CCL15/CXCL2/PLCB1/CXCL3/RAC1/MMP14/CXCL11/CXCL6/THBS1/BST1/PTK2/PIK3R1/CD81/PTK2B/PIKFYVE/…	75	BP
GO:0010038	response to metal ion	92/1159	360/18903	5.24327e-33	6.15e-31	2.18434e-31	CD14/VCAM1/PTGS2/TLR9/IL1A/ALOX15/HMOX1/LTA4H/ARG1/NFE2L2/JUN/NQO1/CASP8/EGFR/CREB1/CDH1/AOC1/CYP1A2/PARP1/MAPK3/CHUK/CASP3/FOS/SOD2/SOD1/BMP6/MAPK1/SHH/LIG4/PLCG2/CYBB/CYP1A1/G6PD/ABCC8/AKR1C3/CCND1/TFRC/CAV1/CASR/TF/HIF1A/MAPK8/PRKAA2/KCNMB1/AKT1/CEBPA/FGG/BECN1/KIT/ATP7A/MAOB/PPP5C/AQP1/NCF1/FABP4/THBS1/TRPM2/SLC12A2/SLC34A1/FOSB/SDC1/PARK7/CASP9/RYR1/PCSK1/KMT2A/ERCC1/KCNMA1/KCNK3/PEF1/DRD2/H…	92	BP
GO:0050878	regulation of body fluid levels	96/1159	390/18903	5.56424e-33	6.41e-31	2.27432e-31	TLR4/IL6/IL18/NOS3/SERPINE1/NFE2L2/CHRM3/F2RL1/ITGB3/LYN/TACR1/CREB1/PRKCA/XDH/ADORA1/MAPK14/CHRM1/VDR/F2R/VEGFA/LCK/SRC/HSD11B2/PRKG1/JAK2/SHH/THBD/PLCG2/CCND1/CAV1/ERBB4/ANO1/HSPB1/HIF1A/SCNN1A/EDNRB/PRKCQ/P2RY12/ANXA2/F3/F10/FGG/AKR1B1/F2/P2RY2/GBA1/NR1H2/ATP7A/ADRA2A/PRKCD/FLNA/SCNN1G/AQP1/DDR1/OPRK1/PLEC/THBS1/ACTB/P2RX1/ENTPD1/PDGFA/P2RY1/LMAN1/PTPN6/SCNN1B/CYP4F2/ELOVL1/PRDX2/WNK1/TRAF3IP2…	96	BP
GO:0031098	stress-activated protein kinase signaling cascade	75/1159	246/18903	1.40506e-32	1.59e-30	5.63667e-31	TNF/TLR4/GSTP1/IL1B/NOD2/SMAD3/TLR9/IL1A/NOD1/TLR3/F2RL1/HMGB1/LYN/NFKB1/EGFR/XDH/MAPK14/DUSP1/CCR7/CCN2/RHOA/MMP8/MAPK3/VEGFA/IRAK1/CCL19/FAS/NPPA/MAPK1/IKBKB/TRAF6/CASR/BMP2/MAPK8/IRAK4/CCL21/XIAP/MYC/RIPK2/MAP3K5/AGT/DUSP10/ZMPSTE24/PLCB1/IGF1R/MAP3K7/PRMT1/HDAC3/NOX1/OPRK1/NCF1/MAPK10/MAP2K1/MEN1/SFRP1/ITCH/PRDX1/RASGRP1/PHLPP1/RIPK1/DNAJA1/AXIN1/LRRK2/ZMYND11/PTK2B/MAP2K4/EPHB1/MECOM/DUSP22/…	75	BP
GO:0034612	response to tumor necrosis factor	76/1159	254/18903	2.18955e-32	2.43e-30	8.6241e-31	TNF/CXCL8/CCL5/CD14/GSTP1/VCAM1/CCL2/PTGS2/CCL17/CCL24/CCL26/CCL22/NFE2L2/F2RL1/TRPV1/STAT1/SELE/NFKBIA/CASP8/NFKB1/MAPK14/TNFRSF4/MAPK3/TNFSF13B/CHUK/CASP3/FOS/CCL19/CASP1/TNFRSF1A/RORA/FAS/MAPK1/CX3CL1/JAK2/CALCA/CCL20/ADAM17/FOXO3/IKBKB/TRAF6/TP53/APOA1/NR1D1/COL1A1/HSPA1A/BIRC3/CCL21/CYP1B1/XIAP/SIRT1/AKT1/CEBPA/HYAL1/MAP3K5/GBA1/NFATC1/CCL15/RELA/CASP4/FABP4/THBS1/CTSK/SFRP1/TRAF3IP2/HES1/RI…	76	BP
GO:0050867	positive regulation of cell activation	105/1159	467/18903	2.42633e-32	2.64e-30	9.38607e-31	TNF/IL12B/IL4R/IL4/TGFB1/CCL5/TLR4/IL6/IL33/IL1B/IL18/VCAM1/CCL2/NOD2/TLR9/IL1A/HLA-DQA1/ITGB2/NLRP3/CD86/MIF/IL12RB1/CD80/F2RL1/ITGAM/HMGB1/LYN/TNFSF4/CCR2/TACR1/DPP4/BTK/CCR7/TNFRSF4/CCN2/RHOA/MMP8/LCK/TNFSF13B/CD38/FYN/CLEC7A/SRC/CCL19/JAK2/SHH/FOXO3/JAK3/TRAF6/RUNX1/CTSC/TFRC/CAV1/CD209/ICOSLG/HSPD1/CCL21/VSIR/PRKCQ/MALT1/RIPK2/AKT1/CEBPA/LGALS1/CD274/BCL6/PTPRC/DUSP10/RPS6KA1/ABL1/CR1/PDCD1L…	105	BP
GO:0050678	regulation of epithelial cell proliferation	98/1159	414/18903	3.721e-32	3.98e-30	1.41419e-30	TNF/ALOX5/IL12B/TGFB1/CCL2/CCL24/NOD2/SMAD3/CCL26/HMOX1/ARG1/C5AR1/JUN/PPARG/ITGB3/STAT1/HMGB1/EGFR/TACR1/CXCL12/PRKCA/XDH/BTK/FLT1/VDR/VEGFA/AR/TGFBR1/BMP6/PTCH1/FGFR1/SHH/TGM1/CTNNB1/ADAM17/PTEN/CCND1/CAV1/FUT2/GPX1/ERBB2/ACVRL1/NOTCH1/BMP2/BAX/HIF1A/KDR/NR1D1/EDNRB/SIRT1/AGTR1/MYC/F3/TGFA/AKT1/HYAL1/PDPK1/AIMP1/DUSP10/SIX1/ATP7A/CFLAR/PRKDC/TEK/NR4A1/ANG/CDH13/THBS1/BID/MEN1/SFRP1/ALDH1A2/ARNT…	98	BP
GO:0018105	peptidyl-serine phosphorylation	84/1159	313/18903	7.19724e-32	7.57e-30	2.68819e-30	TNF/TGFB1/IL6/PTGS2/NOS1/MIF/PDE4D/EGFR/ANGPT1/PRKCA/MAPK14/VEGFA/HSP90AA1/CHUK/SRC/TGFBR1/MAPK1/MTOR/IKBKB/PTEN/TFRC/CAV1/BAX/CDK2/MAPK8/RPS6KA3/RAPGEF3/CD44/PRKCQ/RIPK2/NSD1/AKT1/PDPK1/DCLK1/HAX1/TNKS/DKK1/RPS6KA1/PRKCD/FNIP1/PRKDC/RAF1/PKD1/ATM/SMYD3/IFNA2/MKNK1/GSK3B/PLK1/IRGM/PARK7/GCG/SGK1/HDAC6/WNK1/RIPK1/PIK3CA/AXIN1/IFNA6/LRRK2/BAK1/RPS6KB1/STK4/ROCK2/PRKACA/AURKA/TBK1/TSSK1B/GRK2/ARAF/P…	84	BP
GO:0007249	I-kappaB kinase/NF-kappaB signaling	80/1159	288/18903	1.57177e-31	1.63e-29	5.7711e-30	TNF/TLR4/GSTP1/IL1B/TLR2/NOD2/TLR9/IL1A/NOD1/HMOX1/EDNRA/CX3CR1/TLR3/F2RL1/STAT1/NFKBIA/CASP8/ANGPT1/LTF/BTK/CCR7/RHOA/F2R/HDAC1/CHUK/FYN/IRAK1/CLEC7A/CCL19/CASP1/TNFRSF1A/RORA/CX3CL1/CTNNB1/ESR1/PLCG2/MAVS/IKBKB/TRAF6/TFRC/HSPB1/NR1D1/BIRC3/IRAK4/EDNRB/CCL21/SIRT1/MALT1/RIPK2/AKT1/LGALS1/PDPK1/GJA1/DDX1/RELA/ABL1/IKBKG/MAP3K7/CFLAR/FLNA/PPP5C/CTH/BRD4/EEF1D/TBKBP1/TRAF3IP2/RIPK1/SPHK2/BIRC2/AVPR…	80	BP
GO:0048732	gland development	100/1159	441/18903	3.77653e-31	3.84e-29	1.36352e-29	TNF/TGFB1/IL6/NR3C1/SMAD3/SMAD2/HMOX1/ARG1/EDNRA/CSF1/JUN/CRHR1/NFKB1/EGFR/CREB1/MMP2/CDH1/XDH/VDR/MAPK3/VEGFA/CEBPB/AR/SRC/TGFBR1/SOD2/SOD1/PTCH1/MAPK1/JAK2/SHH/CTNNB1/ESR1/CYP1A1/PTEN/CCND1/CAV1/ORAI1/APOA1/GPX1/NOTCH1/ERBB4/BMP2/BAX/HIF1A/NRG1/CYP1B1/TGFA/AKT1/CEBPA/PSAP/CSF1R/UGT1A6/RPS6KA1/SIX1/RELA/ATP7A/ABL1/ZMPSTE24/CFLAR/RAF1/PKD1/ATM/DDR1/MAP2K1/DAG1/LAMA1/SFRP1/INSR/ALDH1A2/PDGFA/PCSK1…	100	BP
GO:0002696	positive regulation of leukocyte activation	101/1159	450/18903	4.61516e-31	4.62e-29	1.639e-29	TNF/IL12B/IL4R/IL4/TGFB1/CCL5/TLR4/IL6/IL33/IL1B/IL18/VCAM1/CCL2/NOD2/TLR9/IL1A/HLA-DQA1/ITGB2/NLRP3/CD86/MIF/IL12RB1/CD80/F2RL1/ITGAM/HMGB1/LYN/TNFSF4/CCR2/TACR1/DPP4/BTK/CCR7/TNFRSF4/RHOA/MMP8/LCK/TNFSF13B/CD38/FYN/CLEC7A/SRC/CCL19/JAK2/SHH/FOXO3/JAK3/TRAF6/RUNX1/CTSC/TFRC/CAV1/CD209/ICOSLG/HSPD1/CCL21/VSIR/PRKCQ/MALT1/RIPK2/AKT1/CEBPA/LGALS1/CD274/BCL6/PTPRC/DUSP10/ABL1/CR1/PDCD1LG2/PRKDC/MMP1…	101	BP
GO:0018108	peptidyl-tyrosine phosphorylation	92/1159	380/18903	4.91677e-31	4.84e-29	1.71795e-29	TNF/IL12B/IL4/TGFB1/CCL5/IL6/IL18/CSF2/JAK1/NOD2/IL6R/ITGB2/MIF/CD80/ITGB3/LYN/HDAC2/EGFR/ANGPT1/ADORA1/BTK/FLT1/MAPK3/VEGFA/LCK/FYN/SRC/BMP6/TNFRSF1A/JAK2/FGFR1/MTOR/ADAM17/PLCG2/JAK3/TP53/CAV1/ERBB2/ERBB4/KDR/CD44/NRG1/PKM/RIPK2/TGFA/HAX1/CSF1R/AGT/PTPRC/ACVR1/KIT/NOX4/ABL1/ADRA2A/PRKCD/IGF1R/TEK/IFNA2/DDR1/NCF1/HBEGF/NTRK1/MAP2K1/BST1/SFRP1/PTK2/INSR/PDGFA/GRM5/PTPN6/LTK/PDGFRB/CD81/HES1/ADRA1…	92	BP
GO:0051403	stress-activated MAPK cascade	72/1159	239/18903	6.07537e-31	5.89e-29	2.08907e-29	TNF/TLR4/GSTP1/IL1B/NOD2/SMAD3/TLR9/IL1A/NOD1/TLR3/F2RL1/HMGB1/NFKB1/EGFR/XDH/MAPK14/DUSP1/CCR7/CCN2/MMP8/MAPK3/VEGFA/IRAK1/CCL19/FAS/NPPA/MAPK1/IKBKB/TRAF6/CASR/BMP2/MAPK8/IRAK4/CCL21/XIAP/MYC/RIPK2/MAP3K5/AGT/DUSP10/PLCB1/IGF1R/MAP3K7/PRMT1/HDAC3/NOX1/OPRK1/NCF1/MAPK10/MAP2K1/MEN1/SFRP1/ITCH/PRDX1/RASGRP1/PHLPP1/RIPK1/DNAJA1/AXIN1/LRRK2/ZMYND11/PTK2B/MAP2K4/EPHB1/MECOM/DUSP22/PPIA/SPHK1/MAPKAPK…	72	BP
GO:0018212	peptidyl-tyrosine modification	92/1159	382/18903	7.59537e-31	7.24e-29	2.57093e-29	TNF/IL12B/IL4/TGFB1/CCL5/IL6/IL18/CSF2/JAK1/NOD2/IL6R/ITGB2/MIF/CD80/ITGB3/LYN/HDAC2/EGFR/ANGPT1/ADORA1/BTK/FLT1/MAPK3/VEGFA/LCK/FYN/SRC/BMP6/TNFRSF1A/JAK2/FGFR1/MTOR/ADAM17/PLCG2/JAK3/TP53/CAV1/ERBB2/ERBB4/KDR/CD44/NRG1/PKM/RIPK2/TGFA/HAX1/CSF1R/AGT/PTPRC/ACVR1/KIT/NOX4/ABL1/ADRA2A/PRKCD/IGF1R/TEK/IFNA2/DDR1/NCF1/HBEGF/NTRK1/MAP2K1/BST1/SFRP1/PTK2/INSR/PDGFA/GRM5/PTPN6/LTK/PDGFRB/CD81/HES1/ADRA1…	92	BP
GO:0071356	cellular response to tumor necrosis factor	71/1159	234/18903	9.55827e-31	8.98e-29	3.18557e-29	TNF/CXCL8/CCL5/GSTP1/VCAM1/CCL2/CCL17/CCL24/CCL26/CCL22/NFE2L2/F2RL1/TRPV1/STAT1/NFKBIA/CASP8/NFKB1/MAPK14/TNFRSF4/MAPK3/TNFSF13B/CHUK/FOS/CCL19/CASP1/TNFRSF1A/RORA/FAS/MAPK1/CX3CL1/JAK2/CALCA/CCL20/ADAM17/FOXO3/IKBKB/TRAF6/TP53/APOA1/NR1D1/COL1A1/HSPA1A/BIRC3/CCL21/CYP1B1/XIAP/SIRT1/AKT1/CEBPA/HYAL1/MAP3K5/GBA1/NFATC1/CCL15/RELA/CASP4/FABP4/THBS1/CTSK/SFRP1/TRAF3IP2/HES1/RIPK1/BRCA1/BIRC2/PTK2B/…	71	BP
GO:1901214	regulation of neuron death	84/1159	325/18903	1.38426e-30	1.28e-28	4.54354e-29	TNF/CCL5/TLR4/NR3C1/CCL2/HMOX1/ITGB2/CSF1/JUN/CX3CR1/NQO1/ITGAM/CASP8/ANGPT1/ADORA1/PARP1/RHOA/F2R/FYN/CASP3/CEBPB/FOS/SOD2/SOD1/CX3CL1/JAK2/LIG4/CTNNB1/G6PD/FOXO3/CCND1/TP53/DDIT3/BAX/HIF1A/KDR/CLU/SIRT1/AKT1/MAP3K5/DKK1/GBA1/SIX1/ABL1/IKBKG/EGR1/ATM/PPARA/HYOU1/NTRK1/TRPM2/PPARGC1A/GSK3B/PARK7/CASP9/BCL2L1/BCL2L11/CAPN2/PIK3CA/LRRK2/SLC7A11/KRAS/DHCR24/TBK1/NMNAT1/PPT1/SERPINF1/SIGMAR1/PTK2B/NR…	84	BP
GO:0032943	mononuclear cell proliferation	82/1159	312/18903	1.97036e-30	1.8e-28	6.37078e-29	IL12B/IL4/CCL5/TLR4/IL6/IL1B/IL18/VCAM1/TLR9/IL1A/IRF1/CD86/ARG1/MIF/CSF1/IL12RB1/CD80/SLC11A1/HMGB1/LYN/TNFSF4/CCR2/TACR1/IDO1/BTK/AHR/TNFRSF4/TNFSF13B/CD38/FYN/CASP3/CEBPB/CCL19/JAK2/SHH/CTNNB1/JAK3/TRAF6/PTEN/TFRC/TP53/RAC2/ERBB2/CD209/BAX/ICOSLG/HSPD1/VSIR/PRKCQ/MS4A1/MALT1/RIPK2/CD274/BCL6/PTPRC/ABL1/CR1/PRKCD/PDCD1LG2/ATM/IFNA2/CDKN1A/BST1/BID/ITCH/PTPN6/SOS1/BCL2L1/HPRT1/PRDX2/CD81/RASGRP1…	82	BP
GO:0031667	response to nutrient levels	103/1159	474/18903	2.0494e-30	1.84e-28	6.5289e-29	ADRB2/TNF/LTA/VCAM1/PTGS2/NOD2/IL1A/HMOX1/ALB/ARG1/CXCL10/NFE2L2/PPARG/NQO1/TRPV1/STAT1/PON1/AOC1/MAPK14/VDR/MAPK3/OPRM1/FOS/SRC/GPT/HSD11B2/SOD2/SOD1/FAS/MAPK1/MTOR/CYP27B1/CYBB/CYP1A1/G6PD/SPP1/FOXO3/AKR1C3/CCND1/TFRC/TP53/CASR/GPX1/DDIT3/BAX/MC4R/MAPK8/COL1A1/PRKAA2/NCOA1/ADRB1/CYP1B1/SIRT1/AKT1/CBS/MAP3K5/BECN1/NMUR2/GBA1/NR1H2/IGF1R/FNIP1/CYP26A1/SLC2A1/PPARA/HSPA8/ATG7/ALPL/PLEC/NTRK1/CNR1/…	103	BP
GO:1901654	response to ketone	66/1159	205/18903	2.29846e-30	2.03e-28	7.2162e-29	TGFB1/TLR2/NR3C1/ARG1/NQO1/TNFSF4/TACR1/CREB1/AHR/CCR7/PARP1/CD38/AR/FOS/SRC/CCL19/JAK2/CYBB/SPP1/FOXO3/GNB1/AKR1C3/CCND1/CAV1/SCNN1A/PRKAA2/CCL21/CYP1B1/SIRT1/AKT1/GLB1/GBA1/IGF1R/CFLAR/MAOB/SMYD3/SCNN1G/AQP1/NCF1/EIF4E/HSD3B1/THBS1/SFRP1/FOSB/PARK7/CASP9/SCNN1B/SGK1/BCL2L1/CDK4/PIK3CA/SPHK2/GNAI1/RPS6KB1/ROCK2/SERPINF1/ADCY1/ACACA/FBP1/MTAP/PRKAA1/BMI1/ELK1/YAP1/NR1H3/SRD5A1	66	BP
GO:0002685	regulation of leukocyte migration	70/1159	231/18903	2.74008e-30	2.39e-28	8.47982e-29	TNF/IL4/PLA2G7/CXCL8/CCL5/IL6/IL33/ICAM1/CCL2/CCL24/NOD2/IL6R/IL1A/SERPINE1/IL1R1/HMOX1/CXCL10/MIF/C5AR1/CSF1/CX3CR1/F2RL1/ITGB3/SELE/HMGB1/LYN/CCR2/TACR1/CXCR2/CXCL12/DPP4/ADORA1/CCR6/DUSP1/CCR7/RHOA/MAPK3/VEGFA/CCR1/CCL19/MAPK1/CX3CL1/CCL20/ADAM17/RAC2/FPR2/CCL21/P2RY12/BDKRB1/AKT1/CXCL13/CSF1R/ABL1/PLCB1/RAC1/MMP14/OXSR1/THBS1/BST1/PTK2/PIK3R1/WNK1/CD81/PTK2B/KLRK1/MADCAM1/CMKLR1/DNM1L/CD74/PGF	70	BP
GO:0050870	positive regulation of T cell activation	73/1159	251/18903	2.91769e-30	2.51e-28	8.90231e-29	IL12B/IL4R/IL4/CCL5/IL6/IL1B/IL18/VCAM1/CCL2/NOD2/IL1A/HLA-DQA1/NLRP3/CD86/IL12RB1/CD80/HMGB1/LYN/TNFSF4/CCR2/DPP4/CCR7/RHOA/LCK/TNFSF13B/FYN/SRC/CCL19/JAK2/SHH/FOXO3/JAK3/TRAF6/RUNX1/TFRC/CAV1/CD209/ICOSLG/HSPD1/CCL21/VSIR/PRKCQ/MALT1/RIPK2/AKT1/LGALS1/CD274/BCL6/PTPRC/DUSP10/ABL1/CR1/PDCD1LG2/VNN1/SMARCA4/IL1RL2/ACTB/SMARCD2/BRD7/PTPN6/RARA/CD81/RASGRP1/LEF1/HES1/KAT5/HSPH1/PIK3CA/XBP1/KLRK1/HL…	73	BP
GO:0031349	positive regulation of defense response	81/1159	307/18903	3.36615e-30	2.85e-28	1.0128e-28	TNF/IL12B/PLA2G7/CCL5/TLR4/IL6/IL33/IL1B/TLR2/IL18/LTA/PTGS2/CCL24/NOD2/TLR9/MBL2/IL17F/NOD1/SERPINE1/NLRP3/ARG1/C3/TLR3/CREBBP/F2RL1/HMGB1/NFKBIA/LYN/TNFSF4/CCR2/IDO1/BTK/CCR7/MMP8/MAPK3/PLA2G2A/HSP90AA1/FYN/CLEC7A/CEBPB/SRC/CASP1/TNFRSF1A/CX3CL1/JAK2/PLCG2/MAVS/ABCC1/IKBKB/TRAF6/CTSC/EP300/FPR2/AGTR1/RIPK2/CEBPA/LGALS1/NLRP1/AGT/MAP3K7/PRKDC/CASP4/FABP4/CNR1/IRGM/PARK7/CD81/RASGRP1/RIPK1/LRRK2/…	81	BP
GO:2001233	regulation of apoptotic signaling pathway	90/1159	374/18903	3.6614e-30	3.06e-28	1.08654e-28	TNF/IL4/GSTP1/IL1B/CSF2/ICAM1/PTGS2/IL1A/NOS3/SERPINE1/HMOX1/MIF/NFE2L2/CX3CR1/CXCL12/PARP1/LCK/HDAC1/AR/SRC/TGFBR1/SOD2/SOD1/FAS/CX3CL1/JAK2/FGFR1/CTNNB1/PTEN/CTSC/MUC1/TP53/CAV1/GPX1/DDIT3/BAX/HSPB1/HIF1A/ENO1/CLU/HSPA1A/CD44/COL2A1/SIRT1/MYC/AKT1/FGG/BECN1/CTNNA1/AGT/PTPRC/ACVR1/RELA/MDM2/PRKCD/CFLAR/RAF1/CTH/VNN1/NOX1/HYOU1/THBS1/BID/GSK3B/SFRP1/PARK7/BCL2L1/PRDX2/BCL2L11/RIPK1/BRCA1/DNAJA1/L…	90	BP
GO:0030522	intracellular receptor signaling pathway	75/1159	266/18903	4.38741e-30	3.62e-28	1.28439e-28	TLR4/NR3C1/NOD2/ALOX15/PPARG/NFKBIA/AHR/PARP1/VDR/RHOA/HDAC1/AR/SRC/RORA/JAK2/ESR1/CYP27B1/RORC/TRAF6/IFIH1/AKR1C3/EP300/BMP2/NR3C2/NR1D1/HSPA1A/NCOA1/BIRC3/XIAP/SIRT1/RIPK2/CRY1/CRY2/NR1H2/RELA/MAP3K7/PHB1/CYP26A1/NR1I2/PPARA/NR4A1/SKP2/SMARCA4/USP15/NR6A1/RXRB/SFRP1/THRB/ITCH/ALDH1A2/IRGM/PARK7/RARA/THRA/ARNT/HDAC6/KDM4C/ESR2/BRCA1/DNAJA1/RARB/BIRC2/HNF4A/NR4A3/HNF4G/EGLN2/PIM1/YAP1/NR1H3/PPARD…	75	BP
GO:2000377	regulation of reactive oxygen species metabolic process	56/1159	149/18903	6.64065e-30	5.4e-28	1.9181e-28	TNF/ALOX5/TGFB1/TLR4/GSTP1/ITGB2/NFE2L2/F2RL1/ITGAM/XDH/MAPK14/ACE2/RHOA/MMP8/MMP3/FYN/CLEC7A/SOD2/SOD1/PLCG2/G6PD/FOXO3/AKR1C3/TP53/RAC2/FPR2/HIF1A/CYP1B1/AGTR1/F2/BECN1/AGT/PRKCD/CFLAR/VDAC1/RAC1/PPARA/THBS1/CDKN1A/BST1/PARK7/PDGFRB/PRDX2/HDAC6/RIPK1/BRCA1/CBR1/SPHK2/BIRC2/PTK2B/MAPT/PIKFYVE/TRAP1/GRB2/SNCA/AKR1C1	56	BP
GO:0018209	peptidyl-serine modification	84/1159	332/18903	7.22637e-30	5.8e-28	2.05982e-28	TNF/TGFB1/IL6/PTGS2/NOS1/MIF/PDE4D/EGFR/ANGPT1/PRKCA/MAPK14/VEGFA/HSP90AA1/CHUK/SRC/TGFBR1/MAPK1/MTOR/IKBKB/PTEN/TFRC/CAV1/BAX/CDK2/MAPK8/RPS6KA3/RAPGEF3/CD44/PRKCQ/RIPK2/NSD1/AKT1/PDPK1/DCLK1/HAX1/TNKS/DKK1/RPS6KA1/PRKCD/FNIP1/PRKDC/RAF1/PKD1/ATM/SMYD3/IFNA2/MKNK1/GSK3B/PLK1/IRGM/PARK7/GCG/SGK1/HDAC6/WNK1/RIPK1/PIK3CA/AXIN1/IFNA6/LRRK2/BAK1/RPS6KB1/STK4/ROCK2/PRKACA/AURKA/TBK1/TSSK1B/GRK2/ARAF/P…	84	BP
GO:0050921	positive regulation of chemotaxis	55/1159	144/18903	8.19885e-30	6.5e-28	2.30666e-28	IL4/PLA2G7/CXCL8/TGFB1/CCL5/IL6/SMAD3/CCL26/IL6R/SERPINE1/CCR4/CXCL10/C5AR1/CSF1/CX3CR1/F2RL1/HMGB1/CCR2/CXCR2/CXCL12/CCR6/CXCR4/CCR7/MAPK3/VEGFA/CCR1/CCL19/MAPK1/FGFR1/ADAM17/RAC2/CASR/FPR2/HSPB1/KDR/CCL21/P2RY12/F3/S1PR1/CXCL13/CSF1R/RAC1/CDH13/OXSR1/THBS1/PTK2/PDGFRB/WNK1/PTK2B/TPBG/CMKLR1/SUCNR1/DNM1L/CD74/PGF	55	BP
GO:0097193	intrinsic apoptotic signaling pathway	79/1159	298/18903	1.25228e-29	9.8e-28	3.47798e-28	TNF/PTGS2/HMOX1/MIF/NFE2L2/CXCL12/PARP1/LCK/HDAC1/CASP3/CEBPB/SRC/SOD2/SOD1/TNFRSF1A/JAK2/MUC1/TP53/CAV1/GPX1/EP300/DDIT3/BAX/HSPB1/HIF1A/ENO1/CLU/HSPA1A/CD44/CYP1B1/SIRT1/MYC/AKT1/ITPR1/MAP3K5/BECN1/ATP2A3/BCL2A1/ABL1/MDM2/PRKCD/PRKDC/ATM/CASP4/VNN1/NOX1/HYOU1/NBN/CDKN1A/BID/PARK7/CASP9/BCL2L1/PIK3R1/BCL2L11/HINT1/BRCA1/ATP2A1/SFN/DNAJA1/LRRK2/XBP1/BAK1/EPHA2/E2F1/IKBKE/OPA1/TRAP1/PPP1R15A/PPIA/…	79	BP
GO:0007204	positive regulation of cytosolic calcium ion concentration	65/1159	205/18903	1.74971e-29	1.35e-27	4.798e-28	CYSLTR1/CCR5/NOS1/CCR4/EDNRA/C5AR1/CX3CR1/F2RL1/TRPV1/HMGB1/CXCR1/CCR2/TACR1/CXCR2/CCR6/CXCR4/CCR8/CCR7/F2R/CCR1/CD38/JAK2/CALCA/ESR1/JAK3/HRH4/CAV1/FPR2/BAX/CXCR5/EDNRB/ADCYAP1R1/BDKRB1/AGTR1/CACNA1C/S1PR1/CXCL13/NMUR2/AGT/GLP1R/ABL1/GRM1/PKD1/CNR1/FPR1/SLC8A1/P2RY1/S1PR3/MCHR1/CACNA2D1/DRD2/GALR1/ADRA1A/BAK1/DRD1/PTK2B/DRD3/CD52/CMKLR1/GPER1/FFAR4/CCKBR/ACKR3/TRPC5/FFAR1	65	BP
GO:0051090	regulation of DNA-binding transcription factor activity	99/1159	454/18903	2.18989e-29	1.67e-27	5.93e-28	TNF/IRAK3/TLR4/IL6/IL1B/TLR2/IL18/NOD2/SMAD3/TLR9/NOD1/HMOX1/NLRP3/PPARG/CX3CR1/TLR3/NFKBIA/TNFSF4/HDAC2/LTF/BTK/TNFRSF4/MAPK3/ADORA3/VEGFA/CHUK/IRAK1/CLEC7A/AR/PTCH1/ENPP1/CX3CL1/JAK2/SHH/CTNNB1/ESR1/PLCG2/MAVS/IKBKB/TRAF6/PTEN/TFRC/CAV1/EP300/DDIT3/BMP2/IL18RAP/IL1RAP/MAPK8/CLU/HSPA1A/CYP1B1/PRKCQ/SIRT1/MALT1/RIPK2/AKT1/CDKN2A/ARRB1/AGT/KIT/RELA/IKBKG/MAP3K7/CFLAR/TAX1BP1/FLNA/PKD1/CTH/SMARCA4/…	99	BP
GO:0019216	regulation of lipid metabolic process	85/1159	347/18903	4.00709e-29	3.02e-27	1.07168e-27	TNF/TGFB1/IL1B/NR3C1/PTGS2/NOD2/IL1A/C3/PPARG/LYN/NFKB1/CREB1/ADORA1/CCR7/FLT1/SERPINA3/SRC/CCL19/SOD1/BMP6/RORA/MTOR/CYP27B1/PLCG2/RORC/AKR1C3/CAV1/APOA1/BMP2/ABHD5/NR1D1/CCL21/P2RY12/SIRT1/EPHX2/AKT1/F2/PSAP/KIT/NR1H2/ZMPSTE24/ADRA2A/PRKCD/IGF1R/EGR1/STUB1/PPARA/TEK/CNR1/PPARGC1A/FABP1/PTK2/PDGFA/THRA/PDGFRB/CD81/CDK4/KAT5/ATP1A1/BRCA1/CAPN2/LPCAT1/SPHK2/ADIPOR1/HNF4A/CDC42/CES1/UGT1A1/PTK2B/NR…	85	BP
GO:0002687	positive regulation of leukocyte migration	55/1159	148/18903	4.24892e-29	3.16e-27	1.1225e-27	TNF/IL4/PLA2G7/CXCL8/CCL5/IL6/ICAM1/CCL24/IL6R/IL1A/SERPINE1/IL1R1/CXCL10/C5AR1/CSF1/CX3CR1/F2RL1/ITGB3/HMGB1/CCR2/TACR1/CXCR2/CXCL12/CCR6/CCR7/RHOA/MAPK3/VEGFA/CCR1/CCL19/MAPK1/CX3CL1/CCL20/ADAM17/RAC2/FPR2/CCL21/P2RY12/BDKRB1/CXCL13/CSF1R/ABL1/RAC1/MMP14/OXSR1/THBS1/PTK2/PIK3R1/WNK1/PTK2B/MADCAM1/CMKLR1/DNM1L/CD74/PGF	55	BP
GO:0048659	smooth muscle cell proliferation	60/1159	179/18903	8.72194e-29	6.41e-27	2.27644e-27	TNF/IL12B/TGFB1/CCL5/TLR4/IL6/IL18/PTGS2/IL6R/NOS3/HMOX1/JUN/PPARG/ITGB3/STAT1/TACR1/MMP2/ACE2/RHOA/HDAC1/IRAK1/SRC/SOD2/PRKG1/CX3CL1/JAK2/CTNNB1/PTEN/DDIT3/BMP2/IRAK4/AKT1/S1PR1/MAP3K5/GJA1/AGT/IGF1R/PHB1/PRKDC/ADAMTS1/ANG/CDH13/NOX1/HBEGF/THBS1/CDKN1A/PPARGC1A/PDGFRB/DNMT1/TPM1/PIK3CA/RPS6KB1/NR4A3/TCF7L2/EREG/HPGD/S1PR2/PPARD/GPER1/NPR1	60	BP
GO:1990868	response to chemokine	45/1159	98/18903	9.58355e-29	6.88e-27	2.44247e-27	CXCL8/CCL5/CCL2/CCL17/CCL24/CCL26/CCR5/CCL22/CCR4/CXCL10/CX3CR1/LYN/CXCR1/CCR2/CXCR2/CXCL12/CXCL1/CCR6/CXCR4/DUSP1/CCR8/CCR7/RHOA/CXCL5/CCR1/CCL19/CX3CL1/CCL20/ACKR1/HIF1A/CXCR5/CCL21/CXCL13/CCL15/CXCL2/CXCL3/CXCL11/CXCL6/OXSR1/SLC12A2/WNK1/PTK2B/CMKLR1/CIB1/ACKR3	45	BP
GO:1990869	cellular response to chemokine	45/1159	98/18903	9.58355e-29	6.88e-27	2.44247e-27	CXCL8/CCL5/CCL2/CCL17/CCL24/CCL26/CCR5/CCL22/CCR4/CXCL10/CX3CR1/LYN/CXCR1/CCR2/CXCR2/CXCL12/CXCL1/CCR6/CXCR4/DUSP1/CCR8/CCR7/RHOA/CXCL5/CCR1/CCL19/CX3CL1/CCL20/ACKR1/HIF1A/CXCR5/CCL21/CXCL13/CCL15/CXCL2/CXCL3/CXCL11/CXCL6/OXSR1/SLC12A2/WNK1/PTK2B/CMKLR1/CIB1/ACKR3	45	BP
GO:0050920	regulation of chemotaxis	68/1159	230/18903	9.8236e-29	6.97e-27	2.47454e-27	IL4/PLA2G7/CXCL8/TGFB1/CCL5/IL6/CCL2/NOD2/SMAD3/CCL26/IL6R/SERPINE1/CCR4/CXCL10/MIF/C5AR1/CSF1/CX3CR1/F2RL1/HMGB1/LYN/CCR2/CXCR2/CXCL12/DPP4/CCR6/CXCR4/DUSP1/CCR7/MAPK3/VEGFA/CCR1/CCL19/MAPK1/FGFR1/ADAM17/RAC2/CASR/NOTCH1/FPR2/HSPB1/KDR/CCL21/P2RY12/F3/S1PR1/CXCL13/YTHDF1/CSF1R/RAC1/CDH13/OXSR1/THBS1/BST1/PTK2/PDGFRB/WNK1/ST6GAL1/FGF4/PTK2B/KLRK1/TPBG/CMKLR1/FGF1/SUCNR1/DNM1L/CD74/PGF	68	BP
GO:0048660	regulation of smooth muscle cell proliferation	59/1159	175/18903	1.76614e-28	1.23e-26	4.38021e-27	TNF/IL12B/TGFB1/CCL5/TLR4/IL6/IL18/PTGS2/IL6R/NOS3/HMOX1/JUN/PPARG/ITGB3/STAT1/TACR1/MMP2/ACE2/RHOA/HDAC1/IRAK1/SRC/SOD2/PRKG1/CX3CL1/JAK2/CTNNB1/PTEN/BMP2/IRAK4/AKT1/S1PR1/MAP3K5/GJA1/AGT/IGF1R/PHB1/PRKDC/ADAMTS1/ANG/CDH13/NOX1/HBEGF/THBS1/CDKN1A/PPARGC1A/PDGFRB/DNMT1/TPM1/PIK3CA/RPS6KB1/NR4A3/TCF7L2/EREG/HPGD/S1PR2/PPARD/GPER1/NPR1	59	BP
GO:0071674	mononuclear cell migration	64/1159	206/18903	1.77933e-28	1.23e-26	4.38021e-27	TNF/ALOX5/IL4/PLA2G7/CCL5/IL6/ICAM1/CCL2/CCL17/CCL24/CCL26/IL6R/CCR5/SERPINE1/CCL22/CXCL10/C5AR1/ITGAL/CSF1/CX3CR1/ITGB3/HMGB1/LYN/CXCR1/CCR2/CXCR2/CXCL12/CCR6/CXCR4/DUSP1/CCR7/FLT1/RHOA/MAPK3/CCR1/CCL19/MAPK1/CX3CL1/CALCA/CCL20/ADAM17/FPR2/CCL21/AKT1/S1PR1/CXCL13/CSF1R/GBA1/CCL15/ABL1/PLCB1/CXCL11/OXSR1/PLEC/THBS1/TRPM2/SLC12A2/PTK2/WNK1/CDC42/PTK2B/KLRK1/MADCAM1/CMKLR1	64	BP
GO:0043270	positive regulation of ion transport	76/1159	289/18903	2.72455e-28	1.87e-26	6.63172e-27	ADRB2/CCL5/IL1B/CCL2/IL1A/NOS1/CXCL10/MIF/EDNRA/IFNGR2/CCR2/ABCB1/CXCL12/ADORA1/ITGB1/CHRM1/ACE2/F2R/CCR1/CEBPB/NPPA/CX3CL1/PLCG2/G6PD/ABCC8/JAK3/CAV1/CASR/ORAI1/BAX/GSTO1/PTGES/CTSS/ADCYAP1R1/P2RY12/MS4A1/BDKRB1/KCNMB1/AKT1/F2/PDPK1/AGT/ABL1/ADRA2A/FLNA/KCNQ1/CXCL11/TRPV2/OPRK1/PRSS8/SLC12A2/ACTB/P2RX1/SLC34A1/P2RY1/GCG/CYP4F2/PDGFRB/MCHR1/WNK1/KCNK3/CACNA2D1/DRD2/ATP2A1/SPHK2/BAK1/KCNA1/KIF5B/D…	76	BP
GO:0071900	regulation of protein serine/threonine kinase activity	90/1159	395/18903	2.87284e-28	1.95e-26	6.91498e-27	ADRB2/TNF/IRAK3/TGFB1/TLR4/GSTP1/IL1B/NOD2/TLR9/MIF/PPARG/LYN/EGFR/LTF/DUSP1/FLT1/RHOA/VEGFA/CASP3/IRAK1/SRC/CCL19/NPPA/FGFR1/ADAM17/TRAF6/PTEN/CCND1/CAV1/ERBB2/BMP2/HMGA2/SIRT1/TGFA/AKT1/CDKN2A/CEBPA/CBS/MAP3K5/CSF1R/DKK1/AGT/PTPRC/GBA1/DUSP10/KIT/NOX4/ABL1/ADRA2A/PRKCD/MAP3K7/APC/PKD1/THBS1/CDKN1A/MAP2K1/MEN1/PLK1/HMGCR/ACTB/SFRP1/INSR/SLC8A1/IRGM/PDGFA/PTPN6/CCNT1/SOS1/PDGFRB/CCNA2/RASGRP1/PDE…	90	BP
GO:0070663	regulation of leukocyte proliferation	73/1159	269/18903	3.76359e-28	2.52e-26	8.95948e-27	IL12B/IL4/CCL5/TLR4/IL6/IL33/GSTP1/IL1B/IL18/CSF2/VCAM1/TLR9/IL1A/IRF1/CD86/ARG1/MIF/CSF1/IL12RB1/CD80/HMGB1/LYN/TNFSF4/CCR2/TACR1/IDO1/BTK/AHR/TNFRSF4/MAPK3/TNFSF13B/CD38/CASP3/CEBPB/CCL19/MAPK1/JAK2/SHH/CTNNB1/JAK3/TRAF6/PTEN/TFRC/RAC2/ERBB2/CD209/ICOSLG/VSIR/PRKCQ/RIPK2/CD274/BCL6/CSF1R/PTPRC/KIT/CR1/PDCD1LG2/ATM/CDKN1A/BST1/BID/PTK2/ITCH/PTPN6/SOS1/BCL2L1/CD81/HES1/PDE5A/ST6GAL1/INPP5D/BMI1/C…	73	BP
GO:0046651	lymphocyte proliferation	78/1159	305/18903	3.92271e-28	2.6e-26	9.23677e-27	IL12B/IL4/CCL5/TLR4/IL6/IL1B/IL18/VCAM1/TLR9/IL1A/IRF1/CD86/ARG1/MIF/IL12RB1/CD80/SLC11A1/HMGB1/LYN/TNFSF4/CCR2/TACR1/IDO1/BTK/AHR/TNFRSF4/TNFSF13B/CD38/FYN/CASP3/CEBPB/CCL19/JAK2/SHH/CTNNB1/JAK3/TRAF6/PTEN/TFRC/TP53/RAC2/ERBB2/CD209/BAX/ICOSLG/HSPD1/VSIR/PRKCQ/MS4A1/MALT1/RIPK2/CD274/BCL6/PTPRC/ABL1/CR1/PRKCD/PDCD1LG2/ATM/IFNA2/CDKN1A/BST1/BID/ITCH/PTPN6/SOS1/HPRT1/PRDX2/CD81/RASGRP1/LEF1/HES1/P…	78	BP
GO:0002274	myeloid leukocyte activation	68/1159	237/18903	7.18293e-28	4.71e-26	1.67317e-26	TNF/IL4R/IL4/CXCL8/CCL5/TLR4/IL6/IL33/TLR2/IL18/CSF2/TLR9/HMOX1/ITGB2/MIF/C5AR1/TLR1/CSF1/JUN/CX3CR1/TLR3/IFNGR2/F2RL1/TRPV1/ITGAM/SLC11A1/HMGB1/LYN/CCR2/CXCR2/BTK/MMP8/PLA2G2A/RORA/CX3CL1/JAK2/PLCG2/TRAF6/CTSC/RAC2/NR1D1/HSPD1/CLU/LAT/CEBPA/PDPK1/PTPRC/KIT/PRKCD/CNR2/ATM/CXCL6/CNR1/THBS1/DNASE1/PTPN6/SCNN1B/RASGRP1/TRAF3IP2/SPHK2/LRRK2/NR4A3/MAPT/SPHK1/SUCNR1/NR1H3/SNCA/CD74	68	BP
GO:0034614	cellular response to reactive oxygen species	54/1159	150/18903	8.67103e-28	5.63e-26	1.99832e-26	IL6/NOS3/TRPA1/ARG1/NFE2L2/JUN/NQO1/HDAC2/EGFR/MMP2/BTK/MAPK3/CHUK/FYN/FOS/SRC/SOD2/SOD1/MAPK1/FOXO3/AKR1C3/MAPK8/CYP1B1/SIRT1/AKT1/MAP3K5/BECN1/RELA/ATP7A/ABL1/PRKCD/PRDX5/AQP1/NCF1/TRPM2/FABP1/PARK7/PRDX1/APEX1/PRDX2/HDAC6/RIPK1/TPM1/LRRK2/SIGMAR1/PYCR1/NR4A3/MAPT/PRKAA1/TRAP1/SPHK1/MAP1LC3A/CDK1/GPR37	54	BP
GO:2001234	negative regulation of apoptotic signaling pathway	67/1159	233/18903	1.54155e-27	9.9e-26	3.51525e-26	TNF/IL4/GSTP1/IL1B/CSF2/ICAM1/PTGS2/IL1A/NOS3/SERPINE1/HMOX1/MIF/NFE2L2/CX3CR1/CXCL12/HDAC1/AR/SRC/TGFBR1/SOD2/CX3CL1/CTNNB1/MUC1/GPX1/BAX/HSPB1/HIF1A/ENO1/CLU/HSPA1A/CD44/COL2A1/SIRT1/AKT1/FGG/CTNNA1/ACVR1/RELA/MDM2/CFLAR/RAF1/CTH/HYOU1/THBS1/BID/GSK3B/PARK7/BCL2L1/PRDX2/RIPK1/BRCA1/DNAJA1/LRRK2/XBP1/BAK1/RPS6KB1/ZMYND11/TCF7L2/OPA1/TRAP1/PPIA/BMI1/PTPN1/MCL1/YAP1/CD74/ACKR3	67	BP
GO:0051235	maintenance of location	82/1159	342/18903	1.93473e-27	1.23e-25	4.36587e-26	TNF/IL6/IL1B/CCR5/NOS1/ALB/TRPA1/CXCL10/C3/PPARG/PDE4D/ITGB3/TRPV1/NFKBIA/LYN/NFKB1/LCN2/CCR7/F2R/LCK/CCL19/ENPP1/CX3CL1/PLCG2/CAV1/APOA1/DDIT3/BAX/ABHD5/GSTO1/ABCA1/CCL21/BDKRB1/SIRT1/CACNA1C/AKT1/F2/ITPR1/PDPK1/ITPR2/CRY1/CRY2/PTPRC/GBA1/SOAT1/NR1H2/ABL1/FLNA/PKD1/PPARA/CXCL11/HEXB/TRPM2/HSP90B1/SLC8A1/PARK7/LMAN1/RYR1/PTPN6/EHD1/YWHAB/DRD2/ATP2A1/HSPA5/HK1/DGAT1/PRKACA/CES1/DIAPH1/DRD1/PTK2B/S…	82	BP
GO:0035296	regulation of tube diameter	53/1159	147/18903	2.47142e-27	1.54e-25	5.46314e-26	ADRB2/TNF/CYSLTR1/PTGS2/NOS3/NOS1/EDNRA/CHRM3/F2RL1/TACR1/MMP2/ADORA1/ACE2/RHOA/F2R/CD38/SOD2/SOD1/PRKG1/NPPA/CALCA/CAV1/CASR/GPX1/ADRB1/EDNRB/AGTR1/KCNMB1/FGG/P2RY2/CBS/AGT/PIK3C2A/ABL1/ADRA2A/ECE1/TBXAS1/P2RX1/SLC8A1/P2RY1/SCNN1B/KCNMA1/FOXC2/ADRA1A/AVPR2/ROCK2/DRD1/ROCK1/ITGA1/PPARD/GPER1/ADRA2C/NPR1	53	BP
GO:0097746	blood vessel diameter maintenance	53/1159	147/18903	2.47142e-27	1.54e-25	5.46314e-26	ADRB2/TNF/CYSLTR1/PTGS2/NOS3/NOS1/EDNRA/CHRM3/F2RL1/TACR1/MMP2/ADORA1/ACE2/RHOA/F2R/CD38/SOD2/SOD1/PRKG1/NPPA/CALCA/CAV1/CASR/GPX1/ADRB1/EDNRB/AGTR1/KCNMB1/FGG/P2RY2/CBS/AGT/PIK3C2A/ABL1/ADRA2A/ECE1/TBXAS1/P2RX1/SLC8A1/P2RY1/SCNN1B/KCNMA1/FOXC2/ADRA1A/AVPR2/ROCK2/DRD1/ROCK1/ITGA1/PPARD/GPER1/ADRA2C/NPR1	53	BP
GO:0070098	chemokine-mediated signaling pathway	42/1159	90/18903	2.87183e-27	1.77e-25	6.28413e-26	CXCL8/CCL5/CCL2/CCL17/CCL24/CCL26/CCR5/CCL22/CCR4/CXCL10/CX3CR1/LYN/CXCR1/CCR2/CXCR2/CXCL12/CXCL1/CCR6/CXCR4/CCR8/CCR7/CXCL5/CCR1/CCL19/CX3CL1/CCL20/ACKR1/HIF1A/CXCR5/CCL21/CXCL13/CCL15/CXCL2/CXCL3/CXCL11/CXCL6/OXSR1/WNK1/PTK2B/CMKLR1/CIB1/ACKR3	42	BP
GO:0035150	regulation of tube size	53/1159	148/18903	3.62789e-27	2.21e-25	7.83938e-26	ADRB2/TNF/CYSLTR1/PTGS2/NOS3/NOS1/EDNRA/CHRM3/F2RL1/TACR1/MMP2/ADORA1/ACE2/RHOA/F2R/CD38/SOD2/SOD1/PRKG1/NPPA/CALCA/CAV1/CASR/GPX1/ADRB1/EDNRB/AGTR1/KCNMB1/FGG/P2RY2/CBS/AGT/PIK3C2A/ABL1/ADRA2A/ECE1/TBXAS1/P2RX1/SLC8A1/P2RY1/SCNN1B/KCNMA1/FOXC2/ADRA1A/AVPR2/ROCK2/DRD1/ROCK1/ITGA1/PPARD/GPER1/ADRA2C/NPR1	53	BP
GO:0051251	positive regulation of lymphocyte activation	89/1159	400/18903	3.65495e-27	2.21e-25	7.83938e-26	IL12B/IL4R/IL4/TGFB1/CCL5/TLR4/IL6/IL1B/IL18/VCAM1/CCL2/NOD2/TLR9/IL1A/HLA-DQA1/NLRP3/CD86/MIF/IL12RB1/CD80/HMGB1/LYN/TNFSF4/CCR2/TACR1/DPP4/BTK/CCR7/TNFRSF4/RHOA/LCK/TNFSF13B/CD38/FYN/CLEC7A/SRC/CCL19/JAK2/SHH/FOXO3/JAK3/TRAF6/RUNX1/TFRC/CAV1/CD209/ICOSLG/HSPD1/CCL21/VSIR/PRKCQ/MALT1/RIPK2/AKT1/LGALS1/CD274/BCL6/PTPRC/DUSP10/ABL1/CR1/PDCD1LG2/PRKDC/MMP14/VNN1/SMARCA4/IL1RL2/CDKN1A/BST1/ACTB/SMAR…	89	BP
GO:0008217	regulation of blood pressure	60/1159	191/18903	4.66515e-27	2.79e-25	9.90803e-26	ADRB2/TNF/NOS2/PTGS2/SMAD3/NOS3/NOS1/HMOX1/PTGS1/EDNRA/PPARG/PDE4D/F2RL1/TRPV1/TACR1/ADORA1/ACE2/RHOA/F2R/AR/HSD11B2/SOD2/SOD1/NPPA/CALCA/ADH5/ACVRL1/SCNN1A/ADRB1/EDNRB/BDKRB1/AGTR1/PLCB3/COL1A2/AGT/GLP1R/ANPEP/KCNQ1/PPARA/ECE1/SCNN1G/REN/NOX1/CNR1/P2RX1/SCNN1B/SGK1/CYP4F2/WNK1/ATP1A1/KLK1/DRD2/TPM1/ADRA1A/AVPR2/DRD3/SUCNR1/ERAP1/DDAH1/NPR1	60	BP
GO:0097191	extrinsic apoptotic signaling pathway	65/1159	224/18903	5.34207e-27	3.17e-25	1.12355e-25	TNF/IL4/TGFB1/IL33/GSTP1/IL1B/CSF2/ICAM1/SMAD3/IL6R/IL1A/NOS3/SERPINE1/HMOX1/TLR3/CASP8/AR/SRC/TGFBR1/TNFRSF1A/FAS/CX3CL1/JAK2/FGFR1/FOXO3/PTEN/CAV1/GPX1/BAX/HSPA1A/COL2A1/AKT1/FGG/TNFRSF10A/PDPK1/CTNNA1/AGT/PTPRC/ACVR1/BCL2A1/RELA/CFLAR/RAF1/THBS1/BID/GSK3B/BAG3/SFRP1/PARK7/BCL2L1/PIK3R1/PRDX2/BCL2L11/RIPK1/BRCA1/BAK1/RPS6KB1/STK4/ZMYND11/SORT1/TCF7L2/MCL1/YAP1/GPER1/CIB1	65	BP
GO:0070302	regulation of stress-activated protein kinase signaling cascade	61/1159	198/18903	5.68417e-27	3.34e-25	1.18401e-25	TNF/TLR4/GSTP1/IL1B/NOD2/TLR9/IL1A/NOD1/TLR3/F2RL1/HMGB1/LYN/EGFR/XDH/DUSP1/CCR7/CCN2/MMP8/MAPK3/VEGFA/CCL19/FAS/NPPA/MAPK1/TRAF6/BMP2/CCL21/XIAP/MYC/RIPK2/MAP3K5/DUSP10/ZMPSTE24/PLCB1/IGF1R/PRMT1/HDAC3/NOX1/OPRK1/NCF1/MAP2K1/MEN1/SFRP1/ITCH/PRDX1/RASGRP1/PHLPP1/RIPK1/DNAJA1/AXIN1/ZMYND11/PTK2B/MAP2K4/EPHB1/MECOM/DUSP22/PPIA/SPHK1/MAP2K2/HRAS/TAOK1	61	BP
GO:0030098	lymphocyte differentiation	91/1159	419/18903	6.21406e-27	3.61e-25	1.28206e-25	IL12B/IL4R/IL4/IL6/IL1B/IL18/VCAM1/IL6R/TLR9/IL1A/IRF1/NLRP3/CD86/IL12RB1/CD80/HMGB1/TNFSF4/CCR2/CCR6/ITGB1/BTK/CCR7/RHOA/LCK/TNFSF13B/CCL19/SOD1/RORA/SHH/LIG4/CTNNB1/MTOR/ADAM17/PLCG2/FOXO3/RORC/JAK3/RUNX1/TP53/ERBB2/EP300/BAX/VSIR/MS4A1/MALT1/RIPK2/LGALS1/BCL6/PTPRC/GBA1/DUSP10/KIT/ATP7A/ABL1/CR1/FNIP1/EGR1/PRKDC/IKZF1/MMP14/ATM/IFNA2/VNN1/SMARCA4/IL1RL2/NTRK1/ACTB/SFRP1/SMARCD2/BRD7/PRDM1/PTPN…	91	BP
GO:0002697	regulation of immune effector process	86/1159	379/18903	6.48844e-27	3.74e-25	1.32604e-25	TNF/IL12B/IL4R/IL4/IRAK3/TGFB1/TLR4/IL6/IL33/IL1B/IL18/ICAM1/LTA/NOS2/NOD2/TLR9/MBL2/IL17F/NOD1/IL1R1/HMOX1/ITGB2/NLRP3/CD86/ARG1/MIF/C3/IL12RB1/CD80/CX3CR1/TLR3/F2RL1/ITGAM/HMGB1/LYN/TNFSF4/CCR2/ANGPT1/BTK/AHR/TNFRSF4/CLEC7A/CCL19/CFH/PLCG2/MAVS/JAK3/TRAF6/TFRC/RAC2/APOA1/HSPD1/SIRT1/MALT1/RIPK2/PDPK1/BCL6/DDX1/PTPRC/DUSP10/KIT/CR1/MAP3K7/PHB1/CXCL6/IFNA2/NCF1/DNASE1/RBP4/PTPN6/RARA/TP53BP1/CD81…	86	BP
GO:0006875	cellular metal ion homeostasis	91/1159	420/18903	7.48092e-27	4.27e-25	1.51458e-25	CCL5/CCR5/IL1A/NOS1/HMOX1/TRPA1/CXCL10/EDNRA/PDE4D/ITGB3/TRPV1/SLC11A1/LYN/CCR2/CXCL12/LCN2/ADORA1/CCR7/VDR/F2R/LCK/CCR1/CCL19/ATP2A2/SOD1/BMP6/CX3CL1/CALCA/PLCG2/TFRC/ATP4A/CAV1/CASR/DDIT3/TF/BAX/GSTO1/HIF1A/SCNN1A/CCL21/BDKRB1/MYC/CACNA1C/F2/ITPR1/PDPK1/ITPR2/ATP2A3/AGT/PTPRC/CCL15/ATP7A/ABL1/FLNA/GRM1/CXCL11/SCNN1G/HEXB/TRPM2/SLC12A2/HSP90B1/P2RX1/SLC8A1/P2RY1/GRM5/RYR1/PTPN6/SCNN1B/KCNMA1/ATP…	91	BP
GO:0019722	calcium-mediated signaling	62/1159	208/18903	1.63394e-26	9.23e-25	3.27743e-25	TNF/CXCL8/VCAM1/CCR5/CCR4/CX3CR1/CHRM3/SELE/CXCR1/CCR2/CXCR2/CCR6/CXCR4/CCR8/BTK/CCR7/CCR1/CLEC7A/ATP2A2/CCL20/MTOR/PLCG2/FPR2/GSTO1/CXCR5/KDR/NRG1/EDNRB/P2RY12/LAT/AGTR1/CACNA1C/ITPR1/PDPK1/NMUR2/PTPRC/NFATC1/ZMPSTE24/NMUR1/PTBP1/CDH13/TRPM2/BST1/GSK3B/SLC8A1/IRGM/GRM5/HINT1/JPT2/LRRK2/PRKACA/GPR143/PTK2B/GRIN2A/MAPT/PRKAA1/SPHK1/CMKLR1/PLCG1/CALM1/CIB1/ACKR3	62	BP
GO:0051091	positive regulation of DNA-binding transcription factor activity	70/1159	266/18903	3.69917e-26	2.07e-24	7.35189e-25	TNF/IRAK3/TLR4/IL6/IL1B/TLR2/IL18/NOD2/SMAD3/TLR9/NOD1/NLRP3/PPARG/CX3CR1/TLR3/LTF/BTK/VEGFA/CHUK/IRAK1/CLEC7A/AR/CX3CL1/JAK2/SHH/CTNNB1/ESR1/PLCG2/MAVS/IKBKB/TRAF6/PTEN/TFRC/CAV1/EP300/DDIT3/BMP2/IL18RAP/IL1RAP/CLU/HSPA1A/PRKCQ/MALT1/RIPK2/AKT1/AGT/KIT/RELA/IKBKG/MAP3K7/CFLAR/CTH/SMARCA4/NTRK1/PPARGC1A/PARK7/TP53BP1/RIPK1/ESR2/RNF31/DVL2/FLOT1/ADCY1/PRKCH/IKBKE/RPS6KA5/PPIA/SPHK1/IRAK2/CIB1	70	BP
GO:0003012	muscle system process	94/1159	455/18903	4.53811e-26	2.52e-24	8.93726e-25	ADRB2/TNF/IL1B/PTGS2/SMAD3/NOS3/NOS1/HMOX1/EDNRA/PPARG/PDE4D/CHRM3/TRPV1/HDAC2/TACR1/PRKCA/LTB4R/ADORA1/CXCR4/CCN2/PARP1/ACE2/RHOA/F2R/HSP90AA1/CD38/PDE4B/ATP2A2/SOD1/PRKG1/TNFRSF1A/NPPA/CALCA/MTOR/G6PD/ABCC8/FOXO3/CAV1/NOTCH1/GSTO1/ENO1/EDNRB/SCN4A/CACNA1C/BECN1/GJA1/NMUR2/AGT/KIT/PIK3C2A/ADRA2A/CFLAR/NMUR1/FLNA/KCNQ1/PPARA/NR4A1/CHRNA1/DAG1/P2RX1/SLC8A1/P2RY1/RYR1/SCNN1B/MYH7/KCNMA1/ALDOA/ATP1A…	94	BP
GO:0030003	cellular cation homeostasis	99/1159	499/18903	5.6074e-26	3.08e-24	1.09436e-24	CCL5/CCR5/IL1A/NOS1/HMOX1/TRPA1/CXCL10/EDNRA/PDE4D/ITGB3/TRPV1/SLC11A1/LYN/CCR2/CXCL12/LCN2/ADORA1/CCR7/VDR/MAPK3/F2R/LCK/CCR1/CCL19/ATP2A2/SOD1/BMP6/MAPK1/CX3CL1/CALCA/PLCG2/TFRC/ATP4A/CAV1/CASR/DDIT3/TF/BAX/GSTO1/HIF1A/SCNN1A/CCL21/BDKRB1/MYC/CACNA1C/F2/ITPR1/PDPK1/ITPR2/ATP2A3/AGT/PTPRC/CCL15/ATP7A/ABL1/FLNA/GRM1/CXCL11/SCNN1G/HEXB/NOX1/TRPM2/SLC12A2/HSP90B1/P2RX1/SLC26A6/SLC8A1/P2RY1/GRM5/RYR…	99	BP
GO:0046777	protein autophosphorylation	64/1159	226/18903	6.05927e-26	3.3e-24	1.17199e-24	IRAK3/JUN/LYN/EGFR/BTK/FLT1/MAPK3/VEGFA/LCK/FYN/IRAK1/SRC/ENPP1/JAK2/FGFR1/MTOR/CAV1/ERBB2/ERBB4/KDR/AKT1/PDPK1/CSF1R/PTPRC/KIT/ABL1/IGF1R/ATM/TEK/DDR1/OXSR1/NTRK1/NBN/MKNK1/GSK3B/PTK2/INSR/PDGFA/LTK/PDGFRB/MRE11/RIPK1/LRRK2/HCK/STK4/PRKACA/AURKA/NEK2/GRK1/PTK2B/PIKFYVE/EPHB1/VRK1/PIM1/TRPM7/MAPKAPK2/CHEK2/MAP2K2/ATR/CALM1/TAOK1/STK16/AAK1/MAP3K9	64	BP
GO:0002699	positive regulation of immune effector process	69/1159	261/18903	6.2805e-26	3.39e-24	1.20403e-24	TNF/IL12B/IL4R/IL4/TGFB1/TLR4/IL6/IL33/IL1B/IL18/LTA/NOS2/NOD2/TLR9/MBL2/IL17F/NOD1/IL1R1/HMOX1/ITGB2/NLRP3/CD86/ARG1/MIF/C3/IL12RB1/CD80/TLR3/F2RL1/ITGAM/LYN/TNFSF4/CCR2/BTK/TNFRSF4/CLEC7A/CCL19/PLCG2/MAVS/TRAF6/TFRC/RAC2/HSPD1/SIRT1/MALT1/RIPK2/PDPK1/DDX1/PTPRC/KIT/CR1/MAP3K7/PHB1/RBP4/PTPN6/RARA/TP53BP1/CD81/RASGRP1/SPHK2/XBP1/HK1/NR4A3/KLRK1/SLC7A5/HLA-DRB3/MAPKAPK2/CD74/TNFSF13	69	BP
GO:0071496	cellular response to external stimulus	78/1159	328/18903	6.72337e-26	3.6e-24	1.27763e-24	TLR4/IL33/IL1B/VCAM1/PTGS2/IRF1/HMOX1/ALB/NFE2L2/TLR3/ITGB3/LYN/CASP8/NFKB1/AOC1/TLR5/TNFRSF8/VDR/MAPK3/FOS/CASP1/BMP6/TNFRSF1A/FAS/MAPK1/MTOR/CYP27B1/FOXO3/AKR1C3/TP53/CASR/MAPK8/COL1A1/PRKAA2/NCOA1/SIRT1/TNFRSF10A/CBS/MAP3K5/BECN1/AGT/PTPRC/GBA1/IGF1R/FNIP1/MAP3K1/SLC2A1/PPARA/CHEK1/AQP1/HSPA8/ATG7/GSDMD/PLEC/CDKN1A/DAG1/CTSK/BAG3/SFRP1/SLC34A1/FADS1/KAT5/HSPA5/LRRK2/XBP1/BAK1/PIEZO1/MAP2K4/PCS…	78	BP
GO:0043122	regulation of I-kappaB kinase/NF-kappaB signaling	68/1159	255/18903	8.28814e-26	4.4e-24	1.56128e-24	TNF/TLR4/GSTP1/IL1B/NOD2/TLR9/IL1A/NOD1/HMOX1/TLR3/F2RL1/STAT1/CASP8/ANGPT1/LTF/CCR7/RHOA/F2R/HDAC1/CHUK/FYN/IRAK1/CLEC7A/CCL19/CASP1/TNFRSF1A/RORA/CX3CL1/CTNNB1/ESR1/PLCG2/MAVS/IKBKB/TRAF6/TFRC/HSPB1/NR1D1/BIRC3/IRAK4/CCL21/SIRT1/MALT1/RIPK2/LGALS1/PDPK1/GJA1/DDX1/RELA/ABL1/IKBKG/MAP3K7/CFLAR/FLNA/PPP5C/CTH/BRD4/EEF1D/TRAF3IP2/RIPK1/SPHK2/BIRC2/RNF31/SQSTM1/TBK1/ZMYND11/IKBKE/SHARPIN/CD74	68	BP
GO:2000116	regulation of cysteine-type endopeptidase activity	65/1159	235/18903	1.07585e-25	5.66e-24	2.00917e-24	TNF/PTGS2/SMAD3/NOD1/NLRP3/PPARG/HMGB1/CASP8/LTF/XDH/CCN2/RHOA/F2R/VEGFA/LCK/FYN/CLEC7A/SRC/CASP1/FAS/JAK2/GPX1/BAX/HSPD1/RPS6KA3/BIRC3/CD44/XIAP/SIRT1/MALT1/MYC/RIPK2/F3/AKT1/NLRP1/MAP3K5/ATP2A3/RPS6KA1/FNIP1/CFLAR/PSMB9/PRDX5/RAF1/DLC1/AQP1/NR4A1/THBS1/BID/P2RX1/FABP1/PARK7/CASP9/SENP1/BCL2L11/SFN/HSPE1/DNAJB6/BAK1/BIRC2/DHCR24/GRIN2A/MAPT/GPER1/SNCA/DPEP1	65	BP
GO:0032872	regulation of stress-activated MAPK cascade	59/1159	195/18903	1.15157e-25	6.01e-24	2.13219e-24	TNF/TLR4/GSTP1/IL1B/NOD2/TLR9/IL1A/NOD1/TLR3/F2RL1/HMGB1/EGFR/XDH/DUSP1/CCR7/CCN2/MMP8/MAPK3/VEGFA/CCL19/FAS/NPPA/MAPK1/TRAF6/BMP2/CCL21/XIAP/MYC/RIPK2/MAP3K5/DUSP10/PLCB1/IGF1R/PRMT1/HDAC3/NOX1/OPRK1/NCF1/MAP2K1/MEN1/SFRP1/ITCH/PRDX1/RASGRP1/PHLPP1/RIPK1/DNAJA1/AXIN1/ZMYND11/PTK2B/MAP2K4/EPHB1/MECOM/DUSP22/PPIA/SPHK1/MAP2K2/HRAS/TAOK1	59	BP
GO:0023061	signal release	95/1159	470/18903	1.36939e-25	7.08e-24	2.51401e-24	TNF/ALOX5/CCL5/IL6/IL1B/NOS2/PTGS2/IL1RN/IL1A/SMAD2/MIF/PPARG/F2RL1/CRHR1/LYN/TACR1/CREB1/CXCL12/ADORA1/BTK/F2R/ADORA3/CD38/OPRM1/HRH3/ATP2A2/KCNJ11/BMP6/JAK2/SPP1/ABCC8/CASR/ANO1/MC4R/ABCA1/PTGES/HIF1A/NR1D1/EDNRB/AGTR1/FGG/GJA1/AIMP1/CRY1/CRY2/AGT/GLP1R/ADRA2A/DVL1/RAF1/KCNQ1/MAOB/AQP1/NR4A1/REN/OPRK1/CNR1/TRPM2/GSK3B/P2RX1/SFRP1/RBP4/PARK7/P2RY1/GCG/ASIC1/PFKM/SEPTIN5/DRD2/SLC16A1/GALR1/SSTR5/…	95	BP
GO:1902105	regulation of leukocyte differentiation	76/1159	317/18903	1.68323e-25	8.63e-24	3.0642e-24	TNF/IL12B/IL4R/IL4/TGFB1/TLR4/IL18/TLR9/IRF1/NLRP3/CD86/CSF1/IL12RB1/CD80/TLR3/HMGB1/LYN/TNFSF4/CASP8/CCR2/CREB1/LTF/PRKCA/BTK/RHOA/CCR1/CEBPB/FOS/CCL19/SOD1/SHH/CTNNB1/MTOR/FOXO3/JAK3/TRAF6/RUNX1/ERBB2/VSIR/MALT1/MYC/RIPK2/HAX1/BCL6/PTPRC/DUSP10/ABL1/CR1/PRKDC/MMP14/IFNA2/VNN1/SMARCA4/IL1RL2/ACTB/SFRP1/SMARCD2/BRD7/PRDM1/PTPN6/RARA/SOS1/PIK3R1/PRDX2/RASGRP1/LEF1/KAT5/RIPK1/XBP1/TCF7/INPP5D/GPR68…	76	BP
GO:0043281	regulation of cysteine-type endopeptidase activity involved in apoptotic process	60/1159	205/18903	3.1451e-25	1.6e-23	5.67773e-24	TNF/PTGS2/SMAD3/NOD1/NLRP3/PPARG/HMGB1/CASP8/XDH/CCN2/RHOA/F2R/VEGFA/LCK/CLEC7A/SRC/CASP1/FAS/JAK2/GPX1/BAX/HSPD1/RPS6KA3/BIRC3/CD44/XIAP/SIRT1/MALT1/MYC/F3/AKT1/NLRP1/MAP3K5/ATP2A3/RPS6KA1/FNIP1/CFLAR/PRDX5/RAF1/DLC1/AQP1/NR4A1/THBS1/BID/P2RX1/FABP1/PARK7/CASP9/SENP1/BCL2L11/SFN/HSPE1/DNAJB6/BAK1/BIRC2/DHCR24/MAPT/GPER1/SNCA/DPEP1	60	BP
GO:0009266	response to temperature stimulus	57/1159	186/18903	3.7728e-25	1.9e-23	6.75461e-24	ADRB2/CD14/PTGS2/IL1A/NOS3/NOS1/HMOX1/TRPA1/CXCL10/CREBBP/TRPV1/NFKBIA/LYN/HDAC2/CASP8/TACR1/CXCL12/ADORA1/CXCR4/HSP90AA1/IRAK1/FOS/SOD2/SOD1/CALCA/MTOR/EP300/ANO1/HSPB1/HSPD1/HSPA1A/ADRB1/SIRT1/AKT1/STUB1/ATM/TRPV2/NTRK1/THBS1/TRPM2/GSK3B/BAG3/THRA/DNAJA1/DNAJB6/ASIC3/PKLR/RPS6KB1/PRKACA/MAPT/EPHB1/PRKAA1/SLC27A1/MAPKAPK2/FGF1/ATR/SCN9A	57	BP
GO:1903829	positive regulation of protein localization	92/1159	451/18903	4.13118e-25	2.07e-23	7.3356e-24	TNF/TGFB1/TLR4/IL1B/TLR2/PTGS2/SMAD3/IL1A/ITGB2/PPARG/F2RL1/ITGAM/EGFR/CDH1/MAPK14/ITGB1/CHRM1/GZMB/PARP1/HSP90AA1/CD38/FYN/SRC/BMP6/JAK2/SHH/MAVS/TFRC/RAC2/CASR/ERBB2/ERBB4/ANO1/HIF1A/MAPK8/LRP1/PRKAA2/RAPGEF3/AKT1/FGG/F2/PDPK1/NR1H2/PRKCD/FLNA/DVL1/APC/HDAC3/ANG/TRPM2/ACHE/GSK3B/PLK1/BAG3/RBP4/PARK7/GCG/PCSK1/PFKM/CCT8/PIK3R1/HSPA1L/CD81/RAN/HUWE1/SFN/GNAI1/RNF31/EPHA2/SQSTM1/ROCK2/PRKACA/KIF5B…	92	BP
GO:0071375	cellular response to peptide hormone stimulus	74/1159	306/18903	4.17816e-25	2.07e-23	7.35871e-24	IL1B/JAK1/ARG1/EDNRA/NFE2L2/PPARG/ITGB3/STAT1/CRHR1/LYN/NFKB1/PARP1/FOS/SRC/GPT/ENPP1/JAK2/JAK3/CAV1/GAB1/SCNN1A/NCOA1/PKM/CYP1B1/PRKCQ/SIRT1/AGTR1/AKT1/PDPK1/AGT/GLP1R/PIK3C2A/RELA/PLCB1/PRKCD/IGF1R/CFLAR/PRKDC/APC/SCNN1G/NR4A1/MEN1/GSK3B/PTK2/INSR/SCNN1B/APEX1/PIK3R1/CCNA2/CDK4/FOXC2/YWHAG/PIK3CA/PKLR/XBP1/ADIPOR1/RPS6KB1/SHC1/CA2/SLC22A12/ROCK2/NR4A3/FBP1/PCSK9/PRKAA1/PIP4K2A/SLC27A1/ROCK1/GRB…	74	BP
GO:0070588	calcium ion transmembrane transport	79/1159	345/18903	4.51258e-25	2.22e-23	7.88361e-24	TLR9/CCR5/NOS1/TRPA1/CXCL10/EDNRA/PDE4D/ITGB3/TRPV1/CRHR1/LYN/CCR7/CCN2/F2R/LCK/FYN/OPRM1/PDE4B/CCL19/ATP2A2/NPPA/CX3CL1/PLCG2/G6PD/CAV1/ORAI1/DDIT3/BAX/GSTO1/FBXO11/EDNRB/CCL21/ADCYAP1R1/ANXA2/MS4A1/BDKRB1/CACNA1C/F2/ITPR1/PDPK1/ITPR2/ATP2A3/PTPRC/ABL1/ADRA2A/FLNA/VDAC1/PKD1/CXCL11/TRPV2/TRPM2/P2RX1/SLC8A1/ASIC1/RYR1/PTPN6/CACNA2D1/DRD2/ATP2A1/CACNA1H/ADRA1A/BAK1/PRKACA/DIAPH1/DRD1/TRPV5/PTK2B/T…	79	BP
GO:1901655	cellular response to ketone	43/1159	105/18903	4.93223e-25	2.41e-23	8.54782e-24	NR3C1/ARG1/TNFSF4/CREB1/AHR/AR/FOS/SRC/JAK2/SPP1/FOXO3/GNB1/AKR1C3/SCNN1A/PRKAA2/CYP1B1/SIRT1/AKT1/IGF1R/CFLAR/SMYD3/SCNN1G/AQP1/NCF1/EIF4E/SFRP1/PARK7/CASP9/SCNN1B/SGK1/CDK4/SPHK2/GNAI1/RPS6KB1/ROCK2/SERPINF1/ADCY1/ACACA/FBP1/PRKAA1/BMI1/ELK1/SRD5A1	43	BP
GO:0002700	regulation of production of molecular mediator of immune response	57/1159	187/18903	5.1139e-25	2.48e-23	8.79232e-24	TNF/IL4R/IL4/IRAK3/TGFB1/TLR4/IL6/IL33/IL1B/IL18/NOD2/TLR9/IL17F/NOD1/IL1R1/HMOX1/NLRP3/CD86/ARG1/MIF/TLR3/F2RL1/TNFSF4/CCR2/ANGPT1/BTK/TNFRSF4/CLEC7A/PLCG2/MAVS/JAK3/TRAF6/TFRC/APOA1/SIRT1/MALT1/RIPK2/BCL6/DDX1/PTPRC/KIT/CR1/MAP3K7/PHB1/IFNA2/RBP4/TP53BP1/CD81/SPHK2/XBP1/HK1/CGAS/NR4A3/SLC7A5/MAPKAPK2/CD74/TNFSF13	57	BP
GO:0044403	biological process involved in symbiotic interaction	74/1159	307/18903	5.18927e-25	2.49e-23	8.85164e-24	CXCL8/CCL5/ICAM1/CCR5/MBL2/CD86/ARG1/CD80/JUN/CX3CR1/F2RL1/ITGB3/HMGB1/EGFR/LTF/DPP4/CXCR4/ITGB1/TNFRSF4/ACE2/SELPLG/HDAC1/SRC/JAK2/TFRC/TREM1/CAV1/GPX1/EP300/CD209/CFL1/HSPD1/HSPA1A/HMGA2/AGTR1/LGALS1/MRC1/F2/CSF1R/ANPEP/CR1/PHB1/CXCL6/DCD/SLC1A5/HSPA8/IFNA2/SMARCA4/CTSB/DAG1/ITCH/INSR/SCNN1B/CCNT1/BCL2L1/RPSA/CD81/LEF1/VPS4B/JPT2/EPHA2/ROCK2/CDC42/NPC1/EEF1A1/ALYREF/GRK2/PIKFYVE/SCARB1/PPIA/IFI…	74	BP
GO:0002688	regulation of leukocyte chemotaxis	47/1159	127/18903	5.91989e-25	2.82e-23	1.0019e-23	IL4/PLA2G7/CXCL8/CCL5/IL6/CCL2/NOD2/IL6R/SERPINE1/CXCL10/MIF/C5AR1/CSF1/CX3CR1/F2RL1/HMGB1/LYN/CCR2/CXCR2/CXCL12/DPP4/CCR6/DUSP1/CCR7/MAPK3/VEGFA/CCR1/CCL19/MAPK1/ADAM17/RAC2/FPR2/CCL21/CXCL13/CSF1R/RAC1/OXSR1/THBS1/BST1/PTK2/WNK1/PTK2B/KLRK1/CMKLR1/DNM1L/CD74/PGF	47	BP
GO:0001503	ossification	89/1159	429/18903	7.32632e-25	3.47e-23	1.23032e-23	ADRB2/TNF/ALOX5/TGFB1/IL6/PTGS2/SMAD3/IL6R/ALOX15/CSF1/PPARG/EGFR/TACR1/MMP2/LTF/MAPK14/CCN2/VDR/RHOA/MAPK3/CCR1/CEBPB/BMP6/PTCH1/ENPP1/MAPK1/SHH/CALCA/CTNNB1/CYP27B1/SPP1/TRAF6/RUNX1/CASR/NOTCH1/BMP2/EBP/HIF1A/COL1A1/COL2A1/VCAN/PTHLH/AKT1/CEBPA/S1PR1/CBS/COL1A2/DKK1/ACVR1/ZMPSTE24/PHB1/MMP14/ALPL/ACHE/CTSK/HSD17B4/MEN1/GSK3B/MMP13/RXRB/SFRP1/SLC34A1/PTK2/SLC8A1/RYR1/THRA/JAG1/LEF1/FOXC2/CLTC/IA…	89	BP
GO:0055074	calcium ion homeostasis	74/1159	309/18903	7.98005e-25	3.75e-23	1.32979e-23	CCL5/CCR5/NOS1/TRPA1/CXCL10/EDNRA/PDE4D/ITGB3/TRPV1/LYN/CCR2/CXCL12/ADORA1/CCR7/VDR/F2R/LCK/CCR1/CCL19/ATP2A2/CX3CL1/CALCA/CYP27B1/PLCG2/CAV1/CASR/DDIT3/BAX/GSTO1/KDR/CCL21/BDKRB1/CACNA1C/F2/ITPR1/PDPK1/ITPR2/ATP2A3/PTPRC/CCL15/ABL1/FLNA/GRM1/CXCL11/NT5E/HEXB/ALPL/TRPM2/HSP90B1/P2RX1/SLC8A1/P2RY1/GRM5/RYR1/PTPN6/DRD2/ATP2A1/CTRC/BAK1/ATP6V1B1/TSPOAP1/PRKACA/DIAPH1/DRD1/TRPV5/PTK2B/TRPC4/DRD3/GRIA…	74	BP
GO:1903706	regulation of hemopoiesis	87/1159	413/18903	8.30618e-25	3.87e-23	1.37357e-23	TNF/IL12B/IL4R/IL4/TGFB1/TLR4/IL18/TLR9/IRF1/NLRP3/CD86/CSF1/IL12RB1/CD80/TLR3/STAT1/HMGB1/NFKBIA/LYN/TNFSF4/CASP8/CCR2/CREB1/LTF/PRKCA/MAPK14/BTK/RHOA/CCR1/CEBPB/FOS/CCL19/SOD1/SHH/CTNNB1/MTOR/FOXO3/JAK3/TRAF6/RUNX1/ERBB2/HIF1A/HSPA1A/VSIR/MALT1/MYC/RIPK2/CEBPA/HAX1/BCL6/PTPRC/DUSP10/ABL1/CR1/PRKDC/PRMT1/MMP14/IFNA2/VNN1/SMARCA4/IL1RL2/ACTB/SFRP1/SMARCD2/BRD7/PRDM1/PTPN6/RARA/ARNT/SOS1/JAG1/PIK3…	87	BP
GO:0032944	regulation of mononuclear cell proliferation	65/1159	243/18903	8.43413e-25	3.9e-23	1.38417e-23	IL12B/IL4/CCL5/TLR4/IL6/IL1B/IL18/VCAM1/TLR9/IL1A/IRF1/CD86/ARG1/MIF/CSF1/IL12RB1/CD80/HMGB1/LYN/TNFSF4/CCR2/TACR1/IDO1/BTK/AHR/TNFRSF4/TNFSF13B/CD38/CASP3/CEBPB/CCL19/JAK2/SHH/CTNNB1/JAK3/TRAF6/PTEN/TFRC/RAC2/ERBB2/CD209/ICOSLG/VSIR/PRKCQ/RIPK2/CD274/BCL6/PTPRC/CR1/PDCD1LG2/ATM/CDKN1A/BST1/BID/ITCH/PTPN6/SOS1/BCL2L1/CD81/HES1/PDE5A/ST6GAL1/INPP5D/BMI1/CD74	65	BP
GO:0071383	cellular response to steroid hormone stimulus	60/1159	209/18903	9.71447e-25	4.46e-23	1.5823e-23	NR3C1/ARG1/PARP1/RHOA/HDAC1/AR/SRC/JAK2/ESR1/FOXO3/AKR1C3/EP300/NR3C2/SCNN1A/NR1D1/HSPA1A/CYP1B1/SIRT1/CRY1/CRY2/ACVR1/IGF1R/CFLAR/PHB1/PPARA/SMYD3/SCNN1G/AQP1/HSPA8/SKP2/SMARCA4/EIF4E/RXRB/SFRP1/PARK7/CASP9/SCNN1B/SGK1/HDAC6/ATP1A1/BCL2L11/KDM4C/ESR2/BRCA1/DNAJA1/SSTR5/RPS6KB1/NPC1/SERPINF1/UGT1A1/NR4A3/BMI1/EGLN2/YAP1/PPARD/SRD5A1/GPER1/NR2C1/PGR/ESRRA	60	BP
GO:0010959	regulation of metal ion transport	88/1159	423/18903	1.1102e-24	5.06e-23	1.79481e-23	ADRB2/CCL5/CCL2/PTGS2/TLR9/NOS3/NOS1/CXCL10/PDE4D/ITGB3/CRHR1/LYN/CXCL12/ADORA1/CXCR4/ITGB1/RHOA/F2R/CCR1/FYN/PDE4B/NPPA/CX3CL1/CTNNB1/PLCG2/G6PD/ABCC8/JAK3/CAV1/CASR/ORAI1/TF/BAX/GSTO1/FBXO11/ADCYAP1R1/MS4A1/BDKRB1/KCNMB1/CACNA1C/AKT1/F2/PDPK1/AGT/ATP7A/ABL1/ADRA2A/FLNA/VDAC1/CD63/KCNQ1/CXCL11/TRPV2/OPRK1/OXSR1/PRSS8/P2RX1/SLC8A1/GCG/PTPN6/PDGFRB/MCHR1/WNK1/KCNK3/HES1/ATP1A1/CACNA2D1/DRD2/ATP2A1…	88	BP
GO:0007254	JNK cascade	54/1159	172/18903	1.85343e-24	8.38e-23	2.97415e-23	TNF/TLR4/GSTP1/IL1B/NOD2/SMAD3/TLR9/IL1A/NOD1/TLR3/F2RL1/HMGB1/NFKB1/EGFR/CCR7/CCN2/MMP8/IRAK1/CCL19/NPPA/TRAF6/CASR/MAPK8/IRAK4/CCL21/XIAP/RIPK2/MAP3K5/DUSP10/PLCB1/IGF1R/MAP3K7/PRMT1/HDAC3/NOX1/NCF1/MAPK10/MEN1/SFRP1/ITCH/RASGRP1/PHLPP1/RIPK1/DNAJA1/AXIN1/LRRK2/ZMYND11/PTK2B/MAP2K4/EPHB1/MECOM/DUSP22/HRAS/TAOK1	54	BP
GO:0042542	response to hydrogen peroxide	47/1159	130/18903	1.92771e-24	8.65e-23	3.0706e-23	IL6/HMOX1/TRPA1/ARG1/NFE2L2/NQO1/STAT1/HDAC2/MMP2/FYN/CASP3/SRC/SOD2/SOD1/FOXO3/GPX1/COL1A1/CYP1B1/SIRT1/MAP3K5/BECN1/RELA/ABL1/PRKCD/AQP1/TRPM2/FABP1/SLC8A1/SDC1/PARK7/APEX1/PDGFRB/HDAC6/RIPK1/CAPN2/LRRK2/BAK1/SIGMAR1/PYCR1/PTK2B/NR4A3/PRKAA1/TRAP1/SPHK1/MAP1LC3A/CDK1/GPR37	47	BP
GO:0002831	regulation of response to biotic stimulus	80/1159	361/18903	2.18208e-24	9.72e-23	3.45042e-23	IL12B/IL4/IRAK3/CCL5/CD14/TLR4/IL1B/NOD2/TLR9/MBL2/IL17F/NOD1/IRF1/ARG1/MIF/IL12RB1/NFE2L2/PPARG/CREBBP/F2RL1/STAT1/HMGB1/LYN/CASP8/LTF/PRKCA/AHR/PARP1/MAPK3/HSP90AA1/FYN/CLEC7A/SRC/BMP6/CX3CL1/CFH/PLCG2/MAVS/IKBKB/TRAF6/EP300/FPR2/HSPD1/BIRC3/XIAP/RIPK2/CD274/DUSP10/NR1H2/LY96/ZMPSTE24/CR1/MAP3K7/PRKDC/CXCL6/USP15/NCF1/ITCH/SAMHD1/IRGM/PTPN6/PRDX2/RASGRP1/TRAF3IP2/DRD2/HCK/BIRC2/RNF31/TBK1/CGAS/…	80	BP
GO:0048771	tissue remodeling	55/1159	179/18903	2.25631e-24	9.98e-23	3.54194e-23	ADRB2/IL12B/TGFB1/IL6/IL18/IL1A/NOS3/ARG1/EDNRA/PPARG/ITGB3/CCR2/NFKB1/MMP2/PRKCA/VDR/F2R/CD38/SRC/CALCA/CTNNB1/SPP1/TRAF6/RUNX1/TFRC/TP53/CAV1/ACVRL1/TF/BAX/MC4R/HIF1A/S1PR1/CBS/GJA1/CSF1R/AGT/NOX4/ATP7A/MDM2/FLNA/MMP14/CTSK/SFRP1/CAPN1/JAG1/FOXC2/BAK1/TPH1/EPHA2/ROCK2/EPAS1/PTK2B/INPP5D/ROCK1	55	BP
GO:0070665	positive regulation of leukocyte proliferation	53/1159	167/18903	2.79852e-24	1.23e-22	4.3615e-23	IL12B/IL4/CCL5/TLR4/IL6/IL1B/IL18/CSF2/VCAM1/TLR9/IL1A/CD86/MIF/CSF1/IL12RB1/CD80/HMGB1/LYN/TNFSF4/CCR2/TACR1/BTK/TNFRSF4/MAPK3/TNFSF13B/CD38/CCL19/MAPK1/JAK2/SHH/JAK3/TRAF6/TFRC/RAC2/CD209/ICOSLG/PRKCQ/RIPK2/CD274/BCL6/CSF1R/PTPRC/KIT/PDCD1LG2/CDKN1A/BST1/PTK2/BCL2L1/CD81/HES1/ST6GAL1/BMI1/CD74	53	BP
GO:0050731	positive regulation of peptidyl-tyrosine phosphorylation	57/1159	193/18903	3.02322e-24	1.32e-22	4.67804e-23	TNF/IL12B/IL4/TGFB1/CCL5/IL6/IL18/CSF2/NOD2/IL6R/MIF/CD80/ITGB3/LYN/HDAC2/EGFR/ANGPT1/ADORA1/VEGFA/FYN/SRC/BMP6/TNFRSF1A/JAK2/MTOR/ADAM17/PLCG2/TP53/ERBB4/CD44/NRG1/RIPK2/TGFA/HAX1/CSF1R/AGT/PTPRC/ACVR1/KIT/NOX4/ABL1/ADRA2A/IFNA2/NCF1/HBEGF/GRM5/LTK/CD81/HES1/ADRA1A/DVL2/OSBP/PTK2B/TNK2/EREG/PTPN1/CD74	57	BP
GO:2000379	positive regulation of reactive oxygen species metabolic process	35/1159	71/18903	5.81958e-24	2.52e-22	8.94117e-23	TGFB1/TLR4/GSTP1/ITGB2/NFE2L2/F2RL1/ITGAM/XDH/MAPK14/ACE2/MMP8/CLEC7A/SOD2/SOD1/PLCG2/FOXO3/AKR1C3/TP53/FPR2/CYP1B1/AGTR1/F2/AGT/PRKCD/THBS1/CDKN1A/PARK7/PDGFRB/RIPK1/CBR1/PTK2B/MAPT/GRB2/SNCA/AKR1C1	35	BP
GO:0009615	response to virus	85/1159	409/18903	7.72198e-24	3.32e-22	1.17805e-22	TNF/IL12B/IL4/IRAK3/CCL5/IL6/IL33/IL1B/TLR2/JAK1/SMAD3/TLR9/MBL2/IRF1/NLRP3/CCL22/CXCL10/IL12RB1/TLR3/IFNGR2/F2RL1/STAT1/TNFSF4/NFKB1/CXCL12/MAPK14/CXCR4/HSP90AA1/CHUK/SRC/CCL19/CASP1/JAK2/CYP1A1/MAVS/IKBKB/IFIH1/IL10RB/BAX/APOBEC3C/HSPB1/HIF1A/ENO1/CFL1/CLU/BIRC3/HMGA2/IFNAR1/HYAL1/NLRP1/BECN1/DCLK1/DDX1/PTPRC/RELA/ZMPSTE24/IKBKG/PHB1/IFNA2/SKP2/ATG7/USP15/OPRK1/PRF1/ITCH/SAMHD1/IRGM/TBKBP1/BCL2…	85	BP
GO:0002263	cell activation involved in immune response	71/1159	297/18903	8.20593e-24	3.5e-22	1.24312e-22	IL12B/IL4R/IL4/TGFB1/TLR4/IL6/IL33/IL18/ICAM1/IL6R/HMOX1/ITGB2/NLRP3/CD86/ITGAL/IL12RB1/CD80/CX3CR1/F2RL1/ITGAM/SLC11A1/HMGB1/LYN/TNFSF4/CCR2/CCR6/BTK/CCL19/RORA/LIG4/MTOR/PLCG2/RORC/JAK3/TFRC/TP53/RAC2/LRP1/HSPD1/LAT/MALT1/RIPK2/LGALS1/PDPK1/BCL6/PTPRC/KIT/ATP7A/ABL1/CR1/IFNA2/NBN/DNASE1/PTPN6/SCNN1B/RARA/ERCC1/TP53BP1/CD81/RASGRP1/LEF1/EXO1/SPHK2/IFNA6/XBP1/PTK2B/NR4A3/SUCNR1/CD74/TNFSF13/LCP1	71	BP
GO:0031960	response to corticosteroid	52/1159	165/18903	1.09898e-23	4.66e-22	1.65328e-22	TNF/IL6/NR3C1/PTGS2/IL1RN/ARG1/CCN2/PARP1/RHOA/CASP3/FOS/SRC/HSD11B2/BMP6/JAK2/CPN1/CYBB/FOXO3/AKR1C3/CCND1/NOTCH1/SCNN1A/COL1A1/CYP1B1/GLB1/GBA1/ACVR1/IGF1R/CFLAR/MAOB/SMYD3/SCNN1G/AQP1/ALPL/EIF4E/HSD3B1/FOSB/SDC1/CASP9/SCNN1B/PCSK1/SGK1/BCL2L11/PIK3CA/SSTR5/RPS6KB1/SERPINF1/UGT1A1/BCHE/BMI1/SRD5A1/GPER1	52	BP
GO:0071621	granulocyte chemotaxis	46/1159	130/18903	1.7187e-23	7.24e-22	2.56775e-22	IL4/CXCL8/CCL5/IL1B/CCL2/CCL17/CCL24/NOD2/CCL26/ITGB2/CCL22/CXCL10/C5AR1/CSF1/CXCR1/CXCR2/DPP4/CXCL1/CCR7/MAPK3/CXCL5/PDE4B/CCL19/MAPK1/CX3CL1/CCL20/TREM1/RAC2/CCL21/CXCL13/CSF1R/CCL15/CXCL2/CXCL3/RAC1/CXCL11/CXCL6/THBS1/BST1/PTK2/PIKFYVE/PPIA/CMKLR1/ITGA1/DNM1L/CD74	46	BP
GO:0045834	positive regulation of lipid metabolic process	50/1159	154/18903	1.76812e-23	7.39e-22	2.6235e-22	TNF/TGFB1/IL1B/PTGS2/NOD2/IL1A/PPARG/LYN/CREB1/ADORA1/CCR7/FLT1/SRC/CCL19/BMP6/MTOR/APOA1/ABHD5/NR1D1/CCL21/P2RY12/AKT1/F2/KIT/NR1H2/PRKCD/IGF1R/PPARA/TEK/PPARGC1A/FABP1/PTK2/PDGFRB/CD81/KAT5/CAPN2/SPHK2/CDC42/CES1/PTK2B/NR4A3/SCARB1/PRKAA1/PNPLA2/SLC27A1/FGF1/IRS1/NR1H3/PPARD/CD74	50	BP
GO:0002366	leukocyte activation involved in immune response	70/1159	293/18903	1.78262e-23	7.4e-22	2.62702e-22	IL12B/IL4R/IL4/TGFB1/TLR4/IL6/IL33/IL18/ICAM1/IL6R/HMOX1/ITGB2/NLRP3/CD86/ITGAL/IL12RB1/CD80/CX3CR1/F2RL1/ITGAM/SLC11A1/HMGB1/LYN/TNFSF4/CCR2/CCR6/BTK/CCL19/RORA/LIG4/MTOR/PLCG2/RORC/JAK3/TFRC/TP53/RAC2/HSPD1/LAT/MALT1/RIPK2/LGALS1/PDPK1/BCL6/PTPRC/KIT/ATP7A/ABL1/CR1/IFNA2/NBN/DNASE1/PTPN6/SCNN1B/RARA/ERCC1/TP53BP1/CD81/RASGRP1/LEF1/EXO1/SPHK2/IFNA6/XBP1/PTK2B/NR4A3/SUCNR1/CD74/TNFSF13/LCP1	70	BP
GO:1903522	regulation of blood circulation	66/1159	263/18903	1.80304e-23	7.44e-22	2.63916e-22	TNF/CYSLTR1/PTGS2/NOS3/NOS1/EDNRA/PDE4D/CHRM3/TRPV1/TACR1/MMP2/ADORA1/CCN2/ACE2/RHOA/F2R/ADORA3/HSP90AA1/CD38/PDE4B/ATP2A2/NPPA/JAK2/CALCA/CAV1/CASR/GSTO1/ADRB1/EDNRB/AGTR1/CACNA1C/FGG/GJA1/ATP2A3/AGT/GLP1R/ABL1/ZMPSTE24/MDM2/ADRA2A/FLNA/KCNQ1/ECE1/HBEGF/TBXAS1/P2RX1/THRB/SLC8A1/THRA/MYH7/ATP1A1/CACNA2D1/PDE5A/DRD2/ATP2A1/TPM1/CACNA1H/ADRA1A/AVPR2/PRKACA/EPAS1/GRK2/KCNJ5/CALM1/KCNE1/ADRA2C	66	BP
GO:0043405	regulation of MAP kinase activity	55/1159	186/18903	1.81743e-23	7.45e-22	2.64237e-22	TNF/IRAK3/TGFB1/TLR4/GSTP1/IL1B/NOD2/TLR9/MIF/PPARG/LYN/EGFR/DUSP1/FLT1/VEGFA/IRAK1/SRC/CCL19/NPPA/FGFR1/TRAF6/CAV1/ERBB2/BMP2/TGFA/CBS/MAP3K5/DKK1/AGT/PTPRC/GBA1/DUSP10/KIT/NOX4/ADRA2A/PRKCD/MAP3K7/THBS1/HMGCR/SFRP1/INSR/PDGFA/PTPN6/SOS1/PDGFRB/RASGRP1/PDE5A/DNAJA1/AXIN1/LRRK2/DVL2/PTK2B/FGF1/PTPN1/HRAS	55	BP
GO:0002683	negative regulation of immune system process	89/1159	449/18903	2.08974e-23	8.5e-22	3.01802e-22	TNF/IL12B/IL4R/IL4/IRAK3/TGFB1/TLR4/IL33/CCL2/NOD2/IRF1/ALOX15/HMOX1/CD86/ARG1/MIF/CD80/PPARG/CX3CR1/TLR3/HMGB1/LYN/TNFSF4/CCR2/ANGPT1/CXCL12/LTF/DPP4/ADORA1/MAPK14/DUSP1/IDO1/BTK/AHR/PARP1/FYN/CASP3/CEBPB/SRC/CX3CL1/SHH/CTNNB1/PDCD1/JAK3/PTEN/RUNX1/APOA1/GPX1/ERBB2/NR1D1/CCL21/VSIR/MYC/AKT1/CEBPA/CD274/BCL6/PTPRC/DUSP10/NR1H2/CR1/PLCB1/PDCD1LG2/CNR2/ATM/IFNA2/USP15/CNR1/THBS1/SFRP1/ITCH/SAMHD1/P…	89	BP
GO:0048511	rhythmic process	71/1159	302/18903	2.35536e-23	9.52e-22	3.3791e-22	TNF/CSF2/NOS2/NOS3/PPARG/CREBBP/HDAC2/CREB1/MMP2/ADORA1/AHR/PARP1/HDAC1/CASP3/OPRM1/SRC/RORA/ESR1/MTOR/FOXO3/RORC/PTEN/NFKB2/TP53/EP300/MAPK8/NR1D1/PRKAA2/ADRB1/CYP1B1/SIRT1/CRY1/CRY2/IGF1R/EGR1/PRKDC/PPARA/HDAC3/ADAMTS1/ATG7/NAMPT/OPRK1/MAPK10/NTRK1/TRPM2/PPARGC1A/GSK3B/KMT2A/KAT5/PHLPP1/DRD2/HSPA5/HUWE1/TPH1/HNF4A/ROCK2/SERPINF1/ADCY1/PRKAA1/DRD3/CBX3/AFP/SUV39H1/EREG/DNM1L/NR1H3/RORB/SRD5A1/PG…	71	BP
GO:0002367	cytokine production involved in immune response	44/1159	120/18903	2.97528e-23	1.19e-21	4.24039e-22	TNF/IL4/IRAK3/TGFB1/TLR4/IL6/IL1B/IL18/NOD2/TLR9/NOD1/IL1R1/HMOX1/NLRP3/ARG1/MIF/TLR3/F2RL1/TNFSF4/CCR2/ANGPT1/BTK/CLEC7A/PLCG2/MAVS/JAK3/TRAF6/TREM1/APOA1/SIRT1/MALT1/RIPK2/BCL6/DDX1/KIT/MAP3K7/IFNA2/CD81/SPHK2/HK1/NR4A3/SLC7A5/MAPKAPK2/CD74	44	BP
GO:1903557	positive regulation of tumor necrosis factor superfamily cytokine production	42/1159	109/18903	3.05898e-23	1.22e-21	4.33118e-22	IL12B/CD14/TLR4/IL6/IL33/TLR2/NOD2/TLR9/IL1A/IL17F/NOD1/CD86/MIF/TLR1/TLR3/HMGB1/HDAC2/CCR2/BTK/TNFRSF8/MMP8/CLEC7A/CCL19/JAK2/PLCG2/CYBB/MAVS/ABCC8/IFIH1/HSPB1/CLU/RIPK2/PTPRC/LY96/THBS1/PIK3R1/RASGRP1/RIPK1/SPHK2/LRRK2/OAS1/MAPKAPK2	42	BP
GO:0009314	response to radiation	89/1159	452/18903	3.38738e-23	1.34e-21	4.76503e-22	TNF/IL12B/VCAM1/PTGS2/IL1A/CCR4/CXCL10/CREBBP/ITGB3/MMP1/EGFR/MMP2/CXCL12/MAPK14/ITGB1/MME/PARP1/MMP3/CASP3/OPRM1/FOS/SOD2/LIG4/THBD/ABCC8/CCND1/TP53/GPX1/EP300/BAX/HIF1A/MAPK8/SIRT1/MYC/AKT1/HYAL1/CRY1/CRY2/PTPRC/KIT/RELA/ZMPSTE24/MC1R/MDM2/PRKCD/EGR1/PRKDC/ATM/TOPBP1/CHEK1/AQP1/OPRK1/MAPK10/NTRK1/CDKN1A/MEN1/HMGCR/SFRP1/EEF1D/CASP9/PRDM1/KMT2A/ERCC1/BCL2L1/PIK3R1/TP53BP1/KAT5/FEN1/DRD2/BRCA1/HS…	89	BP
GO:0050730	regulation of peptidyl-tyrosine phosphorylation	66/1159	266/18903	3.56404e-23	1.4e-21	4.98118e-22	TNF/IL12B/IL4/TGFB1/CCL5/IL6/IL18/CSF2/NOD2/IL6R/ITGB2/MIF/CD80/ITGB3/LYN/HDAC2/EGFR/ANGPT1/ADORA1/VEGFA/FYN/SRC/BMP6/TNFRSF1A/JAK2/MTOR/ADAM17/PLCG2/TP53/CAV1/ERBB4/CD44/NRG1/RIPK2/TGFA/HAX1/CSF1R/AGT/PTPRC/ACVR1/KIT/NOX4/ABL1/ADRA2A/PRKCD/IFNA2/NCF1/HBEGF/BST1/SFRP1/PDGFA/GRM5/PTPN6/LTK/CD81/HES1/ADRA1A/SHC1/DVL2/OSBP/PTK2B/TNK2/DUSP22/EREG/PTPN1/CD74	66	BP
GO:0071706	tumor necrosis factor superfamily cytokine production	55/1159	189/18903	4.29423e-23	1.67e-21	5.92526e-22	IL12B/IL4/IRAK3/CD14/TLR4/IL6/IL33/GSTP1/TLR2/NOD2/TLR9/IL1A/IL17F/NOD1/CD86/MIF/TLR1/CX3CR1/TLR3/HMGB1/HDAC2/CCR2/ANGPT1/LTF/BTK/TNFRSF8/MMP8/CLEC7A/CCL19/CX3CL1/JAK2/PLCG2/CYBB/MAVS/ABCC8/IFIH1/IL37/HSPB1/CLU/VSIR/RIPK2/CD274/PTPRC/LY96/MC1R/THBS1/PTPN6/RARA/PIK3R1/RASGRP1/RIPK1/SPHK2/LRRK2/OAS1/MAPKAPK2	55	BP
GO:1903555	regulation of tumor necrosis factor superfamily cytokine production	55/1159	189/18903	4.29423e-23	1.67e-21	5.92526e-22	IL12B/IL4/IRAK3/CD14/TLR4/IL6/IL33/GSTP1/TLR2/NOD2/TLR9/IL1A/IL17F/NOD1/CD86/MIF/TLR1/CX3CR1/TLR3/HMGB1/HDAC2/CCR2/ANGPT1/LTF/BTK/TNFRSF8/MMP8/CLEC7A/CCL19/CX3CL1/JAK2/PLCG2/CYBB/MAVS/ABCC8/IFIH1/IL37/HSPB1/CLU/VSIR/RIPK2/CD274/PTPRC/LY96/MC1R/THBS1/PTPN6/RARA/PIK3R1/RASGRP1/RIPK1/SPHK2/LRRK2/OAS1/MAPKAPK2	55	BP
GO:0044089	positive regulation of cellular component biogenesis	94/1159	498/18903	4.60822e-23	1.78e-21	6.31826e-22	TNF/TGFB1/TLR4/CSF2/CCL24/SMAD3/CCL26/ALOX15/F2RL1/MMP1/TACR1/PRKCA/CCR7/CCN2/ACE2/RHOA/MMP3/VEGFA/HSP90AA1/CLEC7A/SRC/CCL19/TGFBR1/CX3CL1/ESR1/MTOR/PLCG2/TFRC/TP53/RAC2/CAV1/APOA1/BAX/CDK2/ABCA1/IL1RAP/KDR/CLU/HSPA1A/RAPGEF3/NRG1/CCL21/P2RY12/HYAL1/BECN1/CXCL13/AGT/KIT/NR1H2/ATP7A/ABL1/ASAP1/FNIP1/STUB1/APC/RAC1/ATM/TEK/NTRK1/DAG1/BID/GSK3B/SFRP1/SDC1/PARK7/ERCC1/SETDB1/PIK3R1/DNMT1/BCL2L11/VPS4…	94	BP
GO:0051924	regulation of calcium ion transport	66/1159	268/18903	5.57878e-23	2.14e-21	7.60088e-22	CCL5/CCL2/PTGS2/TLR9/NOS3/NOS1/CXCL10/PDE4D/ITGB3/CRHR1/LYN/CXCL12/CXCR4/RHOA/F2R/CCR1/FYN/PDE4B/NPPA/CX3CL1/CTNNB1/PLCG2/G6PD/JAK3/CAV1/CASR/ORAI1/BAX/GSTO1/FBXO11/ADCYAP1R1/MS4A1/BDKRB1/CACNA1C/F2/PDPK1/AGT/ABL1/ADRA2A/VDAC1/CXCL11/TRPV2/P2RX1/SLC8A1/GCG/PTPN6/PDGFRB/MCHR1/HES1/CACNA2D1/DRD2/ATP2A1/SPHK2/BAK1/PRKACA/DIAPH1/DRD1/PTK2B/PSEN2/DRD3/GPER1/SNCA/PLCG1/CALM1/KCNE1/FFAR1	66	BP
GO:0050670	regulation of lymphocyte proliferation	62/1159	239/18903	6.12155e-23	2.34e-21	8.28826e-22	IL12B/IL4/CCL5/TLR4/IL6/IL1B/IL18/VCAM1/TLR9/IL1A/IRF1/CD86/ARG1/MIF/IL12RB1/CD80/HMGB1/LYN/TNFSF4/CCR2/TACR1/IDO1/BTK/AHR/TNFRSF4/TNFSF13B/CD38/CASP3/CEBPB/CCL19/JAK2/SHH/CTNNB1/JAK3/TRAF6/PTEN/TFRC/RAC2/ERBB2/CD209/ICOSLG/VSIR/PRKCQ/RIPK2/CD274/BCL6/PTPRC/CR1/PDCD1LG2/ATM/CDKN1A/BST1/BID/ITCH/PTPN6/SOS1/CD81/HES1/PDE5A/INPP5D/BMI1/CD74	62	BP
GO:0043491	protein kinase B signaling	59/1159	218/18903	6.67005e-23	2.53e-21	8.97481e-22	TNF/TGFB1/CCL5/IL1B/IL18/CCL2/CX3CR1/EGFR/ANGPT1/XDH/ITGB1/CCR7/HSP90AA1/SRC/CCL19/TGFBR1/CX3CL1/FGFR1/MTOR/AKR1C3/PTEN/GPX1/DDIT3/KDR/NRG1/CCL21/P2RY12/SIRT1/F3/F10/AKT1/HAX1/NOX4/MC1R/IGF1R/PHB1/PPARA/TEK/HBEGF/NTRK1/THBS1/DAG1/PTK2/INSR/PDGFA/PARK7/PHLPP1/DRD2/PIK3CA/RPS6KB1/EPHA2/TCF7L2/DRD3/LIN28A/ILK/TPBG/GPER1/HPSE/CIB1	59	BP
GO:0006874	cellular calcium ion homeostasis	68/1159	284/18903	6.78603e-23	2.56e-21	9.0745e-22	CCL5/CCR5/NOS1/TRPA1/CXCL10/EDNRA/PDE4D/ITGB3/TRPV1/LYN/CCR2/CXCL12/ADORA1/CCR7/VDR/F2R/LCK/CCR1/CCL19/ATP2A2/CX3CL1/CALCA/PLCG2/CAV1/CASR/DDIT3/BAX/GSTO1/CCL21/BDKRB1/CACNA1C/F2/ITPR1/PDPK1/ITPR2/ATP2A3/PTPRC/CCL15/ABL1/FLNA/GRM1/CXCL11/HEXB/TRPM2/HSP90B1/P2RX1/SLC8A1/P2RY1/GRM5/RYR1/PTPN6/DRD2/ATP2A1/CTRC/BAK1/TSPOAP1/PRKACA/DIAPH1/DRD1/PTK2B/TRPC4/DRD3/GRIA1/GPER1/SNCA/PLCG1/CALM1/TRPC5	68	BP
GO:0072507	divalent inorganic cation homeostasis	77/1159	356/18903	8.15453e-23	3.05e-21	1.08376e-21	CCL5/CCR5/NOS1/TRPA1/CXCL10/EDNRA/PDE4D/ITGB3/TRPV1/SLC11A1/LYN/CCR2/CXCL12/ADORA1/CCR7/VDR/F2R/LCK/CCR1/CCL19/ATP2A2/CX3CL1/CALCA/CYP27B1/PLCG2/CAV1/CASR/DDIT3/BAX/GSTO1/KDR/CCL21/BDKRB1/CACNA1C/F2/ITPR1/PDPK1/ITPR2/ATP2A3/PTPRC/CCL15/ABL1/FLNA/GRM1/CXCL11/NT5E/HEXB/ALPL/TRPM2/HSP90B1/P2RX1/SLC8A1/P2RY1/GRM5/RYR1/PTPN6/DRD2/ATP2A1/CTRC/BAK1/KCNA1/ATP6V1B1/TSPOAP1/PRKACA/DIAPH1/DRD1/TRPV5/PTK2B/T…	77	BP
GO:0051402	neuron apoptotic process	64/1159	255/18903	8.49619e-23	3.16e-21	1.12228e-21	TNF/NR3C1/CCL2/HMOX1/JUN/CX3CR1/NQO1/ITGAM/ANGPT1/PARP1/RHOA/F2R/CASP3/CEBPB/SOD2/SOD1/FAS/CX3CL1/JAK2/LIG4/CTNNB1/G6PD/FOXO3/CCND1/TP53/GPX1/DDIT3/BAX/HIF1A/KDR/XIAP/NLRP1/GBA1/SIX1/ABL1/ATM/HYOU1/NTRK1/PPARGC1A/BID/THRB/PARK7/CASP9/BCL2L1/BCL2L11/HSPA5/PIK3CA/KRAS/PPT1/SIGMAR1/PTK2B/MAP2K4/PCSK9/AKT1S1/EGLN2/ROCK1/CASP7/ITGA1/SCN2A/MCL1/HRAS/SNCA/PAK3/TRPC5	64	BP
GO:0042098	T cell proliferation	58/1159	212/18903	8.59272e-23	3.18e-21	1.12815e-21	IL12B/IL4/CCL5/IL6/IL1B/IL18/VCAM1/IL1A/IRF1/CD86/ARG1/IL12RB1/CD80/SLC11A1/HMGB1/TNFSF4/CCR2/IDO1/TNFRSF4/TNFSF13B/FYN/CASP3/CEBPB/CCL19/JAK2/SHH/CTNNB1/JAK3/TRAF6/PTEN/TFRC/TP53/RAC2/ERBB2/CD209/BAX/ICOSLG/VSIR/PRKCQ/MALT1/RIPK2/CD274/BCL6/PTPRC/ABL1/CR1/PDCD1LG2/BID/ITCH/PTPN6/SOS1/PRDX2/CD81/RASGRP1/HES1/PDE5A/CTPS1/BMI1	58	BP
GO:0070555	response to interleukin-1	47/1159	141/18903	1.06584e-22	3.92e-21	1.39094e-21	IRAK3/CXCL8/CCL5/IL6/IL1B/CCL2/CCL17/CCL24/CCL26/IL1RN/IL1R1/CCL22/SELE/NFKB1/MMP2/PRKCA/MAPK3/CD38/IRAK1/CEBPB/SRC/CCL19/RORA/CX3CL1/CCL20/IKBKB/TRAF6/HIF1A/NR1D1/IRAK4/CCL21/RIPK2/FGG/HYAL1/CCL15/RELA/PLCB1/MAP3K7/EGR1/IL1RL2/SFRP1/PCSK1/HES1/RPS6KA5/BMI1/IRAK2/SNCA	47	BP
GO:1901216	positive regulation of neuron death	38/1159	91/18903	1.21684e-22	4.45e-21	1.57848e-21	TNF/TLR4/NR3C1/ITGB2/NQO1/ITGAM/CASP8/ADORA1/PARP1/RHOA/FYN/CASP3/FOS/CTNNB1/FOXO3/TP53/DDIT3/BAX/CLU/MAP3K5/DKK1/ABL1/EGR1/ATM/TRPM2/GSK3B/CASP9/BCL2L11/CAPN2/MAP2K4/MAPT/PCSK9/PICALM/ELK1/ITGA1/MCL1/SNCA/PAK3	38	BP
GO:0002718	regulation of cytokine production involved in immune response	43/1159	118/18903	1.24826e-22	4.54e-21	1.6096e-21	TNF/IL4/IRAK3/TGFB1/TLR4/IL6/IL1B/IL18/NOD2/TLR9/NOD1/IL1R1/HMOX1/NLRP3/ARG1/MIF/TLR3/F2RL1/TNFSF4/CCR2/ANGPT1/BTK/CLEC7A/PLCG2/MAVS/JAK3/TRAF6/APOA1/SIRT1/MALT1/RIPK2/BCL6/DDX1/KIT/MAP3K7/IFNA2/CD81/SPHK2/HK1/NR4A3/SLC7A5/MAPKAPK2/CD74	43	BP
GO:0002690	positive regulation of leukocyte chemotaxis	39/1159	97/18903	1.78095e-22	6.43e-21	2.2829e-21	IL4/PLA2G7/CXCL8/CCL5/IL6/IL6R/SERPINE1/CXCL10/C5AR1/CSF1/CX3CR1/F2RL1/HMGB1/CCR2/CXCR2/CXCL12/CCR6/CCR7/MAPK3/VEGFA/CCR1/CCL19/MAPK1/ADAM17/RAC2/FPR2/CCL21/CXCL13/CSF1R/RAC1/OXSR1/THBS1/PTK2/WNK1/PTK2B/CMKLR1/DNM1L/CD74/PGF	39	BP
GO:0009408	response to heat	42/1159	114/18903	2.38188e-22	8.55e-21	3.03523e-21	CD14/PTGS2/IL1A/NOS3/NOS1/HMOX1/CXCL10/CREBBP/TRPV1/LYN/HDAC2/TACR1/CXCL12/HSP90AA1/IRAK1/SOD1/CALCA/MTOR/EP300/ANO1/HSPB1/HSPA1A/SIRT1/AKT1/STUB1/ATM/TRPV2/THBS1/TRPM2/GSK3B/BAG3/DNAJA1/DNAJB6/ASIC3/PKLR/RPS6KB1/PRKACA/MAPT/MAPKAPK2/FGF1/ATR/SCN9A	42	BP
GO:0097553	calcium ion transmembrane import into cytosol	53/1159	182/18903	2.57918e-22	9.21e-21	3.26744e-21	CCR5/NOS1/TRPA1/CXCL10/PDE4D/ITGB3/TRPV1/LYN/CCR7/CCN2/F2R/LCK/FYN/CCL19/CX3CL1/PLCG2/CAV1/DDIT3/BAX/GSTO1/CCL21/ADCYAP1R1/MS4A1/BDKRB1/CACNA1C/F2/ITPR1/PDPK1/ITPR2/PTPRC/ABL1/FLNA/CXCL11/TRPV2/TRPM2/P2RX1/SLC8A1/RYR1/PTPN6/CACNA2D1/DRD2/ADRA1A/BAK1/PRKACA/DIAPH1/DRD1/TRPV5/PTK2B/GRIN2A/GPER1/SNCA/PLCG1/CALM1	53	BP
GO:0150076	neuroinflammatory response	34/1159	73/18903	2.7382e-22	9.72e-21	3.44872e-21	TNF/IL4/IL6/IL33/IL1B/TLR2/IL18/PTGS2/TLR9/ITGB2/C5AR1/JUN/CX3CR1/TLR3/IFNGR2/TRPV1/ITGAM/ITGB1/MMP8/MMP3/CX3CL1/JAK2/PLCG2/CTSC/LRP1/NR1D1/CLU/PTPRC/ATM/LRRK2/ADCY1/MAPT/SPHK1/SNCA	34	BP
GO:0043123	positive regulation of I-kappaB kinase/NF-kappaB signaling	54/1159	189/18903	2.80119e-22	9.88e-21	3.50767e-21	TNF/TLR4/IL1B/NOD2/TLR9/IL1A/NOD1/HMOX1/TLR3/F2RL1/CASP8/LTF/CCR7/RHOA/F2R/CHUK/FYN/IRAK1/CLEC7A/CCL19/CASP1/TNFRSF1A/CX3CL1/CTNNB1/MAVS/IKBKB/TRAF6/TFRC/BIRC3/IRAK4/CCL21/MALT1/RIPK2/LGALS1/GJA1/DDX1/RELA/ABL1/IKBKG/MAP3K7/CFLAR/FLNA/PPP5C/CTH/BRD4/EEF1D/TRAF3IP2/RIPK1/BIRC2/RNF31/TBK1/IKBKE/SHARPIN/CD74	54	BP
GO:0050679	positive regulation of epithelial cell proliferation	59/1159	224/18903	2.99542e-22	1.05e-20	3.72933e-21	TNF/CCL24/NOD2/CCL26/HMOX1/ARG1/C5AR1/JUN/ITGB3/HMGB1/EGFR/TACR1/CXCL12/PRKCA/BTK/VEGFA/AR/TGFBR1/BMP6/FGFR1/SHH/TGM1/CTNNB1/ADAM17/CCND1/ERBB2/ACVRL1/NOTCH1/BMP2/HIF1A/KDR/SIRT1/AGTR1/MYC/F3/TGFA/AKT1/HYAL1/PDPK1/ATP7A/CFLAR/TEK/NR4A1/ANG/CDH13/SFRP1/ARNT/CDH3/NME1/XBP1/CDC42/NR4A3/TCF7L2/FGF1/YAP1/HRAS/PLCG1/PGF/GPBAR1	59	BP
GO:0045862	positive regulation of proteolysis	78/1159	372/18903	3.29582e-22	1.15e-20	4.07987e-21	TNF/IL33/IL1B/SMAD3/NOD1/NLRP3/NFE2L2/PPARG/HMGB1/LYN/HDAC2/CASP8/XDH/CCN2/RHOA/F2R/LCK/FYN/CLEC7A/SRC/CASP1/FAS/JAK2/PTEN/CTSC/CAV1/BAX/ENO1/HSPD1/CLU/HSPA1A/VSIR/ANXA2/SIRT1/MALT1/MYC/RIPK2/F3/AKT1/CEBPA/NLRP1/MAP3K5/ATP2A3/GBA1/CR1/MDM2/ADRA2A/CFLAR/STUB1/DVL1/MMP14/DLC1/AGTPBP1/BID/GSK3B/PLK1/P2RX1/PTK2/CASP9/SENP1/BCL2L11/FZR1/PSMD14/ADRM1/HSPE1/AXIN1/LRRK2/BAK1/ROCK2/AURKA/PTK2B/GRIN2A/MAPT…	78	BP
GO:0002702	positive regulation of production of molecular mediator of immune response	45/1159	133/18903	4.32574e-22	1.5e-20	5.32438e-21	IL4R/IL4/TGFB1/TLR4/IL6/IL33/IL1B/IL18/NOD2/TLR9/IL17F/NOD1/IL1R1/NLRP3/CD86/MIF/TLR3/F2RL1/TNFSF4/BTK/TNFRSF4/CLEC7A/PLCG2/MAVS/TRAF6/TFRC/SIRT1/MALT1/RIPK2/DDX1/PTPRC/KIT/MAP3K7/PHB1/RBP4/TP53BP1/CD81/SPHK2/XBP1/HK1/NR4A3/SLC7A5/MAPKAPK2/CD74/TNFSF13	45	BP
GO:0060249	anatomical structure homeostasis	73/1159	333/18903	4.75608e-22	1.63e-20	5.7901e-21	ADRB2/TLR4/IL6/PTGS2/NOD2/TLR9/NOS3/ALB/CSF1/ITGB3/ANGPT1/LTF/PRKCA/ADORA1/ITGB1/CCN2/SERPINA3/F2R/VEGFA/CD38/SRC/ATP2A2/SOD1/CX3CL1/CALCA/CTNNB1/SPP1/ABCC8/TRAF6/TFRC/CAV1/NOTCH1/TF/BAX/MC4R/HSPB1/HIF1A/KDR/XIAP/COL2A1/TJP1/S1PR1/GJA1/CSF1R/NOX4/SLC2A1/HEXB/CHRNA1/SLC12A2/CTSK/BAG3/ACTB/P2RX1/RBP4/P2RY1/PRDX1/PFKM/KMT2A/ALDOA/CDH3/LPCAT1/KRAS/CA2/TSPOAP1/EPAS1/LARGE1/PTK2B/ACACA/PRKAA1/INPP5D/OA…	73	BP
GO:0097530	granulocyte migration	49/1159	158/18903	4.75756e-22	1.63e-20	5.7901e-21	IL4/CXCL8/CCL5/IL1B/CCL2/CCL17/CCL24/NOD2/CCL26/IL1A/IL1R1/ITGB2/CCL22/CXCL10/C5AR1/CSF1/CXCR1/CXCR2/DPP4/CXCL1/CCR7/MAPK3/CXCL5/PDE4B/CCL19/MAPK1/CX3CL1/CCL20/TREM1/RAC2/IRAK4/CCL21/CXCL13/CSF1R/CCL15/CXCL2/CXCL3/RAC1/CXCL11/CXCL6/THBS1/BST1/PTK2/PIKFYVE/PPIA/CMKLR1/ITGA1/DNM1L/CD74	49	BP
GO:0001659	temperature homeostasis	52/1159	178/18903	5.47991e-22	1.87e-20	6.63196e-21	ADRB2/TNF/IL4R/IL4/TLR4/IL1B/IL18/PTGS2/IL1A/TRPV1/CCR2/LCN2/ADORA1/CXCR4/VEGFA/CEBPB/JAK2/ADAM17/CAV1/GPX1/NOTCH1/DDIT3/PTGES/NR1D1/ADRB1/EDNRB/GJA1/NR1H2/IGF1R/EHMT1/EGR1/APC/HDAC3/TRPV2/ALPL/FABP4/CNR1/TRPM2/ACHE/PPARGC1A/THRA/DRD2/FOXC2/ADIPOR1/SQSTM1/EPAS1/DRD1/PRDM16/SLC27A1/CMKLR1/NR1H3/FFAR4	52	BP
GO:0032760	positive regulation of tumor necrosis factor production	40/1159	105/18903	5.5812e-22	1.89e-20	6.71703e-21	IL12B/CD14/TLR4/IL6/IL33/TLR2/NOD2/TLR9/IL1A/NOD1/MIF/TLR1/TLR3/HMGB1/HDAC2/CCR2/BTK/TNFRSF8/MMP8/CLEC7A/CCL19/JAK2/PLCG2/CYBB/MAVS/ABCC8/IFIH1/HSPB1/CLU/RIPK2/PTPRC/LY96/THBS1/PIK3R1/RASGRP1/RIPK1/SPHK2/LRRK2/OAS1/MAPKAPK2	40	BP
GO:0052548	regulation of endopeptidase activity	84/1159	428/18903	7.53635e-22	2.54e-20	9.01996e-21	TNF/PTGS2/SMAD3/NOD1/SERPINE1/NLRP3/C3/PPARG/HMGB1/LYN/CASP8/LTF/XDH/CCN2/RHOA/SERPINA3/F2R/VEGFA/LCK/HDAC1/FYN/CLEC7A/SRC/CASP1/FAS/JAK2/GPX1/BAX/HSPD1/RPS6KA3/BIRC3/CD44/VSIR/XIAP/ANXA2/SIRT1/MALT1/MYC/RIPK2/F3/AKT1/NLRP1/MAP3K5/ATP2A3/AGT/RPS6KA1/CR1/FNIP1/CFLAR/PSMB9/PRDX5/RAF1/DLC1/PEBP1/AQP1/NR4A1/THBS1/BID/P2RX1/FABP1/PARK7/CASP9/SENP1/SERPINB8/BCL2L11/SERPINH1/SFN/PSMD14/ADRM1/HSPE1/DNAJB…	84	BP
GO:0030217	T cell differentiation	68/1159	296/18903	8.18041e-22	2.74e-20	9.73701e-21	IL12B/IL4R/IL4/IL6/IL1B/IL18/IL6R/IL1A/IRF1/NLRP3/CD86/IL12RB1/CD80/HMGB1/TNFSF4/CCR2/CCR6/CCR7/RHOA/LCK/CCL19/SOD1/RORA/SHH/LIG4/CTNNB1/MTOR/ADAM17/FOXO3/RORC/JAK3/RUNX1/TP53/ERBB2/VSIR/MALT1/RIPK2/BCL6/PTPRC/GBA1/DUSP10/KIT/ATP7A/ABL1/CR1/EGR1/PRKDC/IFNA2/VNN1/SMARCA4/IL1RL2/ACTB/SMARCD2/BRD7/PRDM1/RARA/SOS1/PIK3R1/PRDX2/RASGRP1/TRAF3IP2/LEF1/KAT5/XBP1/TCF7/BMI1/ZEB1/CD74	68	BP
GO:0051092	positive regulation of NF-kappaB transcription factor activity	48/1159	154/18903	9.91073e-22	3.31e-20	1.17321e-20	TNF/IRAK3/TLR4/IL1B/TLR2/IL18/NOD2/TLR9/NOD1/NLRP3/CX3CR1/TLR3/LTF/BTK/CHUK/IRAK1/CLEC7A/AR/CX3CL1/PLCG2/IKBKB/TRAF6/TFRC/CAV1/EP300/IL18RAP/IL1RAP/CLU/HSPA1A/PRKCQ/MALT1/RIPK2/AGT/RELA/IKBKG/MAP3K7/CFLAR/CTH/NTRK1/RIPK1/RNF31/FLOT1/PRKCH/RPS6KA5/PPIA/SPHK1/IRAK2/CIB1	48	BP
GO:0071241	cellular response to inorganic substance	59/1159	229/18903	1.00232e-21	3.33e-20	1.18008e-20	PTGS2/TLR9/ALOX15/HMOX1/NFE2L2/JUN/NQO1/EGFR/CREB1/CDH1/AOC1/CYP1A2/PARP1/MAPK3/MMP3/CHUK/FOS/SOD1/BMP6/MAPK1/SHH/LIG4/PLCG2/CYBB/CYP1A1/AKR1C3/TF/CDK2/MAPK8/PRKAA2/AKT1/CEBPA/BECN1/ATP7A/CFLAR/AQP1/NCF1/FABP4/TRPM2/SLC12A2/SLC34A1/FOSB/RYR1/CCNA2/KCNK3/HSPA5/SLC40A1/CACNA1H/LRRK2/KCNA1/SERPINF1/ADCY1/RAD51/FBP1/PRKAA1/HSD17B1/MAP1LC3A/SNCA/DPEP1	59	BP
GO:0008202	steroid metabolic process	71/1159	323/18903	1.51179e-21	4.99e-20	1.77028e-20	TNF/IL4/NR3C1/IL1A/NFKB1/PON1/CYP3A4/CYP1A2/HSD11B2/SOD1/BMP6/RORA/SHH/ESR1/CYP27B1/CYP1A1/G6PD/SPP1/RORC/AKR1C3/APOA1/BMP2/EBP/ABCA1/NR1D1/PRKAA2/EDNRB/SULT1A1/CYP1B1/SIRT1/EPHX2/CYP2C9/CEBPA/AKR1B1/GBA1/SOAT1/KIT/IGF1R/EGR1/CYP26A1/STUB1/NR1I2/CYP2C8/HSD3B1/G6PC1/HSD17B4/HMGCR/HSD11B1/SCNN1B/SULT2B1/CYP21A2/ATP1A1/CYP17A1/CBR1/CACNA1H/DHCR24/NPC1/CES1/ATP8B1/OSBP/UGT1A1/PCSK9/SCARB1/PRKAA1/HSD1…	71	BP
GO:0052547	regulation of peptidase activity	87/1159	459/18903	1.54627e-21	5.07e-20	1.80092e-20	TNF/PTGS2/SMAD3/NOD1/SERPINE1/NLRP3/C3/PPARG/HMGB1/LYN/CASP8/LTF/XDH/CCN2/RHOA/SERPINA3/F2R/VEGFA/LCK/HDAC1/FYN/CLEC7A/SRC/CASP1/FAS/JAK2/CAV1/GPX1/BAX/LRP1/HSPD1/RPS6KA3/BIRC3/CD44/VSIR/XIAP/ANXA2/SIRT1/MALT1/MYC/RIPK2/F3/AKT1/NLRP1/MAP3K5/ATP2A3/AGT/RPS6KA1/CR1/FNIP1/CFLAR/PSMB9/PRDX5/RAF1/DLC1/PEBP1/AQP1/NR4A1/THBS1/CTSB/BID/P2RX1/FABP1/PARK7/CASP9/SENP1/SERPINB8/BCL2L11/SERPINH1/SFN/PSMD14/AD…	87	BP
GO:0015850	organic hydroxy compound transport	67/1159	292/18903	1.76813e-21	5.77e-20	2.0483e-20	NOS1/PPARG/ITGB3/CRHR1/NFKBIA/NFKB1/CXCL12/PON1/ADORA3/HRH3/BMP6/PTCH1/SHH/SPP1/CAV1/APOA1/ABCA1/LRP1/CLU/ANXA2/SIRT1/AGTR1/AGT/SOAT1/NR1H2/ADRA2A/KCNQ1/MAOB/AQP1/SLCO1B1/REN/OPRK1/SLC5A1/CNR1/ACTB/P2RX1/SLC26A6/RBP4/PARK7/P2RY1/VPS4B/DRD2/SLC16A1/GALR1/ASIC3/SLC22A1/NPC1/CES1/DRD1/ATP8B1/OSBP/GRK2/PCSK9/SCARB1/PRKAA1/DRD3/PIP4K2A/SLC18A1/SLCO1A2/MSR1/GABBR1/NR1H3/SNCA/ABCC2/AKR1C1/ADRA2C/CHRM5	67	BP
GO:0007162	negative regulation of cell adhesion	69/1159	308/18903	1.83956e-21	5.97e-20	2.11972e-20	IL4R/IL4/TGFB1/IL1RN/SERPINE1/IRF1/CD86/ARG1/CD80/HMGB1/TNFSF4/MMP2/ANGPT1/CXCL12/CDH1/DUSP1/IDO1/RHOA/VEGFA/CASP3/CEBPB/SRC/PRKG1/BMP6/CX3CL1/JAK2/SHH/JAK3/PTEN/RUNX1/MUC1/APOA1/ERBB2/ACVRL1/NOTCH1/BMP2/COL1A1/CCL21/CYP1B1/VSIR/AKT1/CDKN2A/FGG/CD274/BCL6/EPCAM/PTPRC/ABL1/CR1/PRKCD/PDCD1LG2/MMP14/PPARA/DLC1/IFNA2/CDH13/THBS1/MEN1/PTK2/ITCH/PTPN6/JAG1/PIK3R1/PRDX2/WNK1/PDE5A/DUSP22/ARHGDIA/CD74	69	BP
GO:0002269	leukocyte activation involved in inflammatory response	28/1159	50/18903	1.97834e-21	6.39e-20	2.26757e-20	TNF/IL4/IL6/IL33/TLR2/TLR9/ITGB2/C5AR1/JUN/CX3CR1/TLR3/IFNGR2/TRPV1/ITGAM/MMP8/CX3CL1/JAK2/CTSC/NR1D1/CLU/PTPRC/ATM/SCNN1B/TRAF3IP2/LRRK2/MAPT/SPHK1/SNCA	28	BP
GO:0045765	regulation of angiogenesis	74/1159	349/18903	1.99694e-21	6.42e-20	2.27684e-20	TNF/ALOX5/CYSLTR1/CXCL8/IL6/IL1B/JAK1/CCL24/IL1A/NOS3/IL17F/SERPINE1/HMOX1/CXCL10/C5AR1/C3/NFE2L2/PPARG/CX3CR1/TLR3/ITGB3/STAT1/CCR2/CXCR2/PRKCA/CXCR4/ITGB1/FLT1/VEGFA/CTNNB1/CYBB/ABCC8/RUNX1/ERBB2/ACVRL1/GAB1/HSPB1/HIF1A/KDR/RAPGEF3/PKM/HMGA2/CYP1B1/SIRT1/F3/HYAL1/TJP1/PDPK1/CXCL13/AGT/ABL1/TEK/AQP1/ADAMTS1/PGK1/THBS1/SLC12A2/SFRP1/BMPER/FOXC2/BRCA1/XBP1/EPHA2/ROCK2/SERPINF1/PTK2B/SPHK1/ROCK1/FG…	74	BP
GO:0071466	cellular response to xenobiotic stimulus	52/1159	183/18903	2.21294e-21	7.07e-20	2.50991e-20	GSTM1/GSTP1/IL1B/NOS2/NOS1/NFE2L2/EPHX1/NQO1/TLR3/ITGB3/ABCB1/CYP3A4/CXCR4/AHR/CYP1A2/PDE4B/RORA/CYP1A1/GSTA1/RORC/ABCC1/TFRC/TP53/NAT1/GSTO1/PRKAA2/SULT1A1/CYP1B1/MYC/CYP2C9/UGT1A6/CYP26A1/KCNQ1/NR1I2/SLCO1B1/REN/CYP2C8/CYP4F2/HSPA5/CBR1/HNF4A/E2F1/CES2/UGT1A1/BCHE/FBP1/PRKAA1/CHEK2/ABCC2/DPEP1/AKR1C1/AOX1	52	BP
GO:0019233	sensory perception of pain	39/1159	103/18903	2.37438e-21	7.55e-20	2.67899e-20	TNF/IL12B/IL33/CCL2/PTGS2/IL1A/TRPA1/TRPV1/CCR2/TACR1/CXCL12/ADORA1/CXCR4/MME/MAPK3/F2R/FYN/OPRM1/CALCA/ANO1/PTGES/EDNRB/BDKRB1/NMUR2/MC1R/CNR2/GRM1/AQP1/OPRK1/NTRK1/CNR1/P2RY1/ASIC3/KCNA1/GRIN2A/EPHB1/MGLL/SCN1A/SCN9A	39	BP
GO:0031663	lipopolysaccharide-mediated signaling pathway	31/1159	63/18903	2.41145e-21	7.63e-20	2.70672e-20	TNF/TGFB1/CCL5/CD14/TLR4/IL1B/TLR2/IL18/CCL2/NOS3/MIF/NFKBIA/LYN/LTF/PRKCA/MAPK14/MAPK3/IRAK1/BMP6/MAPK1/CX3CL1/PLCG2/TRAF6/MALT1/RIPK2/AKT1/LY96/PRDX2/HCK/SCARB1/IRAK2	31	BP
GO:0051222	positive regulation of protein transport	67/1159	294/18903	2.6368e-21	8.3e-20	2.9444e-20	TNF/TGFB1/TLR4/IL1B/TLR2/PTGS2/SMAD3/IL1A/ITGB2/PPARG/F2RL1/ITGAM/CDH1/MAPK14/CHRM1/GZMB/HSP90AA1/CD38/FYN/SRC/BMP6/JAK2/SHH/MAVS/RAC2/CASR/ERBB2/ANO1/HIF1A/MAPK8/RAPGEF3/FGG/NR1H2/PRKCD/FLNA/HDAC3/ANG/TRPM2/ACHE/GSK3B/BAG3/RBP4/GCG/PCSK1/PFKM/PIK3R1/HSPA1L/CD81/RAN/HUWE1/SFN/RNF31/PRKACA/OSBP/PRKAA1/TCF7L2/NMT1/KIF20B/PPIA/GPR68/DNM1L/PPARD/GPER1/HRAS/CDK1/CIB1/FFAR1	67	BP
GO:0007188	adenylate cyclase-modulating G protein-coupled receptor signaling pathway	61/1159	248/18903	2.67563e-21	8.38e-20	2.97244e-20	ADRB2/CXCL10/EDNRA/PDE4D/CHRM3/ITGB3/CRHR1/PRKCA/ADORA1/CHRM1/OPRM1/PDE4B/HRH3/CALCA/GNB1/HRH4/CASR/FPR2/MC4R/ABCA1/ADRB1/ADCYAP1R1/P2RY12/PTHLH/S1PR1/PSAP/GLP1R/RAMP1/MC1R/ADRA2A/FLNA/CNR2/GRM1/OXER1/CXCL11/OPRK1/CNR1/FPR1/P2RY1/GRM5/GCG/S1PR3/MCHR1/DRD2/GALR1/ADRA1A/GNAI1/AVPR2/PRKACB/DRD1/ADCY1/DRD3/ADGRL4/S1PR2/GABBR1/ADGRG6/GPER1/RXFP1/GPR37/ADRA2C/CHRM5	61	BP
GO:1904951	positive regulation of establishment of protein localization	69/1159	310/18903	2.70596e-21	8.43e-20	2.99079e-20	TNF/TGFB1/TLR4/IL1B/TLR2/PTGS2/SMAD3/IL1A/ITGB2/PPARG/F2RL1/ITGAM/CDH1/MAPK14/CHRM1/GZMB/HSP90AA1/CD38/FYN/SRC/BMP6/JAK2/SHH/MAVS/RAC2/CASR/ERBB2/ANO1/HIF1A/MAPK8/RAPGEF3/FGG/NR1H2/PRKCD/FLNA/HDAC3/ANG/TRPM2/ACHE/GSK3B/BAG3/RBP4/GCG/PCSK1/PFKM/CCT8/PIK3R1/HSPA1L/CD81/RAN/HUWE1/SFN/RNF31/PRKACA/CCT5/OSBP/PRKAA1/TCF7L2/NMT1/KIF20B/PPIA/GPR68/DNM1L/PPARD/GPER1/HRAS/CDK1/CIB1/FFAR1	69	BP
GO:0002443	leukocyte mediated immunity	87/1159	463/18903	2.8171e-21	8.72e-20	3.09529e-20	TNF/IL12B/IL4R/IL4/TGFB1/TLR4/IL6/IL1B/IL18/ICAM1/LTA/NOS2/NOD2/TLR9/MBL2/IL1R1/HLA-DQA1/HMOX1/ITGB2/NLRP3/ARG1/C3/IL12RB1/CX3CR1/TLR3/F2RL1/ITGAM/HMGB1/LYN/TNFSF4/CCR2/CCR6/BTK/AHR/GZMB/CLEC7A/LIG4/ADAM17/PLCG2/MAVS/JAK3/TRAF6/CTSC/TFRC/TREM1/RAC2/HSPD1/CLU/IRAK4/LAT/MALT1/F2/PDPK1/BCL6/DDX1/PTPRC/KIT/CR1/PRKCD/MAP3K7/CXCL6/IFNA2/PRF1/NBN/DNASE1/PRDX1/PTPN6/SCNN1B/ERCC1/JAG1/HPRT1/TP53BP1/CD81/R…	87	BP
GO:0042116	macrophage activation	40/1159	109/18903	2.82908e-21	8.72e-20	3.09529e-20	TNF/IL4R/IL4/TLR4/IL6/IL33/TLR2/CSF2/TLR9/ITGB2/MIF/C5AR1/TLR1/JUN/CX3CR1/TLR3/IFNGR2/TRPV1/ITGAM/SLC11A1/MMP8/RORA/CX3CL1/JAK2/PLCG2/CTSC/NR1D1/HSPD1/CLU/CEBPA/PTPRC/ATM/THBS1/LRRK2/MAPT/SPHK1/SUCNR1/NR1H3/SNCA/CD74	40	BP
GO:0006936	muscle contraction	74/1159	351/18903	2.85066e-21	8.74e-20	3.10323e-20	ADRB2/TNF/PTGS2/NOS1/EDNRA/PDE4D/CHRM3/TRPV1/TACR1/LTB4R/ADORA1/CXCR4/CCN2/ACE2/RHOA/F2R/HSP90AA1/CD38/PDE4B/ATP2A2/SOD1/PRKG1/NPPA/CALCA/MTOR/CAV1/GSTO1/ENO1/EDNRB/SCN4A/CACNA1C/GJA1/NMUR2/AGT/KIT/PIK3C2A/ADRA2A/NMUR1/FLNA/KCNQ1/NR4A1/CHRNA1/P2RX1/SLC8A1/RYR1/SCNN1B/MYH7/KCNMA1/ALDOA/ATP1A1/CACNA2D1/PDE5A/DRD2/ATP2A1/TPM1/PIK3CA/CACNA1H/ADRA1A/RPS6KB1/KCNA1/ROCK2/PRKACA/DRD1/P2RX6/GRK2/SLMAP/SPH…	74	BP
GO:0048661	positive regulation of smooth muscle cell proliferation	38/1159	98/18903	2.87065e-21	8.76e-20	3.10936e-20	TNF/TGFB1/CCL5/TLR4/IL6/IL18/PTGS2/IL6R/HMOX1/JUN/ITGB3/STAT1/MMP2/HDAC1/IRAK1/SRC/CX3CL1/JAK2/IRAK4/AKT1/S1PR1/MAP3K5/GJA1/AGT/IGF1R/PHB1/ADAMTS1/CDH13/NOX1/HBEGF/THBS1/PDGFRB/DNMT1/PIK3CA/RPS6KB1/NR4A3/EREG/HPGD	38	BP
GO:0032640	tumor necrosis factor production	52/1159	184/18903	2.90637e-21	8.78e-20	3.11689e-20	IL12B/IL4/IRAK3/CD14/TLR4/IL6/IL33/GSTP1/TLR2/NOD2/TLR9/IL1A/NOD1/MIF/TLR1/CX3CR1/TLR3/HMGB1/HDAC2/CCR2/ANGPT1/LTF/BTK/TNFRSF8/MMP8/CLEC7A/CCL19/CX3CL1/JAK2/PLCG2/CYBB/MAVS/ABCC8/IFIH1/IL37/HSPB1/CLU/VSIR/RIPK2/PTPRC/LY96/MC1R/THBS1/PTPN6/RARA/PIK3R1/RASGRP1/RIPK1/SPHK2/LRRK2/OAS1/MAPKAPK2	52	BP
GO:0032680	regulation of tumor necrosis factor production	52/1159	184/18903	2.90637e-21	8.78e-20	3.11689e-20	IL12B/IL4/IRAK3/CD14/TLR4/IL6/IL33/GSTP1/TLR2/NOD2/TLR9/IL1A/NOD1/MIF/TLR1/CX3CR1/TLR3/HMGB1/HDAC2/CCR2/ANGPT1/LTF/BTK/TNFRSF8/MMP8/CLEC7A/CCL19/CX3CL1/JAK2/PLCG2/CYBB/MAVS/ABCC8/IFIH1/IL37/HSPB1/CLU/VSIR/RIPK2/PTPRC/LY96/MC1R/THBS1/PTPN6/RARA/PIK3R1/RASGRP1/RIPK1/SPHK2/LRRK2/OAS1/MAPKAPK2	52	BP
GO:0090257	regulation of muscle system process	62/1159	256/18903	2.97504e-21	8.95e-20	3.17482e-20	ADRB2/PTGS2/SMAD3/NOS3/NOS1/PPARG/PDE4D/CHRM3/TACR1/PRKCA/ADORA1/CCN2/PARP1/ACE2/RHOA/F2R/HSP90AA1/PDE4B/ATP2A2/SOD1/PRKG1/TNFRSF1A/NPPA/CALCA/G6PD/ABCC8/FOXO3/CAV1/NOTCH1/GSTO1/ENO1/SCN4A/CACNA1C/BECN1/NMUR2/AGT/KIT/ADRA2A/KCNQ1/PPARA/NR4A1/DAG1/P2RX1/SLC8A1/MYH7/KCNMA1/ATP1A1/PDE5A/ATP2A1/TPM1/ADRA1A/RPS6KB1/KCNA1/ROCK2/PRKACA/GRK2/NR4A3/SPHK1/ROCK1/GPER1/CALM1/ADRA2C	62	BP
GO:0071248	cellular response to metal ion	54/1159	198/18903	3.09085e-21	9.25e-20	3.28223e-20	PTGS2/TLR9/ALOX15/HMOX1/NFE2L2/JUN/NQO1/EGFR/CREB1/CDH1/AOC1/CYP1A2/PARP1/MAPK3/CHUK/FOS/SOD1/BMP6/MAPK1/SHH/LIG4/PLCG2/CYBB/CYP1A1/AKR1C3/TF/MAPK8/PRKAA2/AKT1/CEBPA/BECN1/ATP7A/AQP1/NCF1/FABP4/TRPM2/SLC12A2/SLC34A1/FOSB/RYR1/KCNK3/HSPA5/SLC40A1/CACNA1H/LRRK2/KCNA1/SERPINF1/ADCY1/FBP1/PRKAA1/HSD17B1/MAP1LC3A/SNCA/DPEP1	54	BP
GO:0007200	phospholipase C-activating G protein-coupled receptor signaling pathway	39/1159	105/18903	5.364e-21	1.6e-19	5.66835e-20	C5AR1/CX3CR1/F2RL1/TACR1/CXCR2/LTB4R/CHRM1/F2R/OPRM1/CALCA/ESR1/GNB1/CASR/FPR2/ANO1/EDNRB/P2RY12/AGTR1/F2/P2RY2/S1PR1/NMUR2/AGT/ADRA2A/NMUR1/GRM1/OPRK1/FPR1/P2RY1/GRM5/DRD2/ADRA1A/DRD1/DRD3/NTSR2/CCKAR/CMKLR1/FFAR4/CCKBR	39	BP
GO:0071902	positive regulation of protein serine/threonine kinase activity	58/1159	229/18903	5.54828e-21	1.64e-19	5.83462e-20	ADRB2/TNF/TGFB1/TLR4/IL1B/NOD2/TLR9/MIF/EGFR/LTF/FLT1/RHOA/VEGFA/IRAK1/SRC/CCL19/FGFR1/ADAM17/TRAF6/CCND1/ERBB2/BMP2/HMGA2/SIRT1/TGFA/AKT1/MAP3K5/CSF1R/DKK1/PTPRC/KIT/NOX4/ADRA2A/MAP3K7/PKD1/THBS1/MAP2K1/INSR/IRGM/PDGFA/CCNT1/PDGFRB/RASGRP1/PDE5A/AXIN1/LRRK2/STK4/DVL2/PTK2B/SLC27A1/FGF1/PTPN1/MAP2K2/HRAS/SNCA/CALM1/TAOK1/CIB1	58	BP
GO:1901342	regulation of vasculature development	74/1159	355/18903	5.75653e-21	1.7e-19	6.02437e-20	TNF/ALOX5/CYSLTR1/CXCL8/IL6/IL1B/JAK1/CCL24/IL1A/NOS3/IL17F/SERPINE1/HMOX1/CXCL10/C5AR1/C3/NFE2L2/PPARG/CX3CR1/TLR3/ITGB3/STAT1/CCR2/CXCR2/PRKCA/CXCR4/ITGB1/FLT1/VEGFA/CTNNB1/CYBB/ABCC8/RUNX1/ERBB2/ACVRL1/GAB1/HSPB1/HIF1A/KDR/RAPGEF3/PKM/HMGA2/CYP1B1/SIRT1/F3/HYAL1/TJP1/PDPK1/CXCL13/AGT/ABL1/TEK/AQP1/ADAMTS1/PGK1/THBS1/SLC12A2/SFRP1/BMPER/FOXC2/BRCA1/XBP1/EPHA2/ROCK2/SERPINF1/PTK2B/SPHK1/ROCK1/FG…	74	BP
GO:0071347	cellular response to interleukin-1	40/1159	111/18903	6.1685e-21	1.81e-19	6.42448e-20	IRAK3/CXCL8/CCL5/IL6/IL1B/CCL2/CCL17/CCL24/CCL26/IL1RN/IL1R1/CCL22/NFKB1/MMP2/MAPK3/IRAK1/CEBPB/CCL19/RORA/CX3CL1/CCL20/IKBKB/TRAF6/HIF1A/NR1D1/IRAK4/CCL21/FGG/HYAL1/CCL15/RELA/PLCB1/MAP3K7/EGR1/IL1RL2/SFRP1/HES1/RPS6KA5/BMI1/IRAK2	40	BP
GO:0046328	regulation of JNK cascade	45/1159	141/18903	6.40838e-21	1.87e-19	6.64238e-20	TNF/TLR4/GSTP1/IL1B/NOD2/TLR9/IL1A/NOD1/TLR3/F2RL1/HMGB1/EGFR/CCR7/CCN2/MMP8/CCL19/NPPA/TRAF6/CCL21/XIAP/RIPK2/MAP3K5/DUSP10/PLCB1/IGF1R/PRMT1/HDAC3/NOX1/NCF1/MEN1/SFRP1/ITCH/RASGRP1/PHLPP1/RIPK1/DNAJA1/AXIN1/ZMYND11/PTK2B/MAP2K4/EPHB1/MECOM/DUSP22/HRAS/TAOK1	45	BP
GO:0045766	positive regulation of angiogenesis	52/1159	187/18903	6.50116e-21	1.88e-19	6.67468e-20	CYSLTR1/CXCL8/IL1B/JAK1/CCL24/IL1A/NOS3/SERPINE1/HMOX1/C5AR1/C3/NFE2L2/CX3CR1/TLR3/ITGB3/CXCR2/PRKCA/CXCR4/ITGB1/FLT1/VEGFA/CYBB/RUNX1/ACVRL1/GAB1/HSPB1/HIF1A/KDR/RAPGEF3/PKM/HMGA2/CYP1B1/SIRT1/F3/HYAL1/TJP1/PDPK1/ABL1/TEK/AQP1/THBS1/BMPER/FOXC2/BRCA1/XBP1/PTK2B/SPHK1/FGF1/ERAP1/PLCG1/PGF/DDAH1	52	BP
GO:1904018	positive regulation of vasculature development	52/1159	187/18903	6.50116e-21	1.88e-19	6.67468e-20	CYSLTR1/CXCL8/IL1B/JAK1/CCL24/IL1A/NOS3/SERPINE1/HMOX1/C5AR1/C3/NFE2L2/CX3CR1/TLR3/ITGB3/CXCR2/PRKCA/CXCR4/ITGB1/FLT1/VEGFA/CYBB/RUNX1/ACVRL1/GAB1/HSPB1/HIF1A/KDR/RAPGEF3/PKM/HMGA2/CYP1B1/SIRT1/F3/HYAL1/TJP1/PDPK1/ABL1/TEK/AQP1/THBS1/BMPER/FOXC2/BRCA1/XBP1/PTK2B/SPHK1/FGF1/ERAP1/PLCG1/PGF/DDAH1	52	BP
GO:0030099	myeloid cell differentiation	80/1159	407/18903	6.71333e-21	1.93e-19	6.86e-20	TNF/IL12B/IL4/TGFB1/TLR4/TLR2/CSF2/CSF1/JUN/PPARG/TLR3/F2RL1/STAT1/NFKBIA/LYN/CASP8/CREB1/LTF/PRKCA/MAPK14/CCR7/PARP1/VEGFA/CCR1/CASP3/CEBPB/FOS/SRC/CCL19/JAK2/CTNNB1/MTOR/G6PD/FOXO3/JAK3/TRAF6/RUNX1/TFRC/EP300/TF/HIF1A/HSPA1A/ANXA2/SIRT1/MYC/CEBPA/HAX1/BCL6/CSF1R/GBA1/KIT/FLNA/PRKDC/PRMT1/IKZF1/KCNQ1/SFRP1/CASP9/PTPN6/RARA/THRA/ARNT/JAG1/PIK3R1/CD81/LEF1/FLI1/PABPC4/RIPK1/EPHA2/CDC42/EPAS1/PTK2B…	80	BP
GO:0072503	cellular divalent inorganic cation homeostasis	70/1159	323/18903	6.85047e-21	1.96e-19	6.96727e-20	CCL5/CCR5/NOS1/TRPA1/CXCL10/EDNRA/PDE4D/ITGB3/TRPV1/SLC11A1/LYN/CCR2/CXCL12/ADORA1/CCR7/VDR/F2R/LCK/CCR1/CCL19/ATP2A2/CX3CL1/CALCA/PLCG2/CAV1/CASR/DDIT3/BAX/GSTO1/CCL21/BDKRB1/CACNA1C/F2/ITPR1/PDPK1/ITPR2/ATP2A3/PTPRC/CCL15/ABL1/FLNA/GRM1/CXCL11/HEXB/TRPM2/HSP90B1/P2RX1/SLC8A1/P2RY1/GRM5/RYR1/PTPN6/DRD2/ATP2A1/CTRC/BAK1/TSPOAP1/PRKACA/DIAPH1/DRD1/PTK2B/TRPC4/DRD3/TRPM7/GRIA1/GPER1/SNCA/PLCG1/CALM…	70	BP
GO:0050729	positive regulation of inflammatory response	47/1159	154/18903	7.08664e-21	2.02e-19	7.17378e-20	TNF/IL12B/PLA2G7/TLR4/IL6/IL33/IL1B/TLR2/IL18/LTA/PTGS2/CCL24/TLR9/SERPINE1/NLRP3/C3/TLR3/NFKBIA/TNFSF4/CCR2/IDO1/BTK/CCR7/MMP8/PLA2G2A/CEBPB/CASP1/TNFRSF1A/CX3CL1/JAK2/PLCG2/ABCC1/CTSC/AGTR1/CEBPA/LGALS1/NLRP1/AGT/CASP4/FABP4/CNR1/PARK7/CD81/RIPK1/LRRK2/SUCNR1/SNCA	47	BP
GO:0009914	hormone transport	67/1159	300/18903	8.53948e-21	2.42e-19	8.60428e-20	TNF/ALOX5/CCL5/IL6/IL1B/NOS2/IL1RN/SMAD2/PPARG/CRHR1/LYN/TACR1/CREB1/ADORA1/BTK/CD38/KCNJ11/BMP6/JAK2/SPP1/ABCC8/CASR/ANO1/MC4R/HIF1A/NR1D1/AGTR1/FGG/GJA1/AIMP1/CRY1/CRY2/AGT/GLP1R/ADRA2A/RAF1/KCNQ1/AQP1/SLCO1B1/REN/OPRK1/CNR1/TRPM2/SFRP1/RBP4/PARK7/P2RY1/GCG/PFKM/DRD2/SLC16A1/GALR1/SSTR5/HNF4A/PFKL/OSBP/TCF7L2/SLC7A5/CCKAR/TTR/GPR68/GABBR1/IRS1/PPARD/GPER1/FFAR4/FFAR1	67	BP
GO:0014074	response to purine-containing compound	45/1159	142/18903	8.83823e-21	2.5e-19	8.86408e-20	IL1B/PTGS2/TRPV1/STAT1/HDAC2/CREB1/ADORA1/AHR/FOS/SOD1/KCNJ11/ENPP1/THBD/COL1A1/RAPGEF3/CYP1B1/P2RY12/P2RY2/ITPR2/KCNQ1/CHEK1/NT5E/AQP1/REN/DUOX1/TRPM2/HSP90B1/P2RX1/SLC26A6/FOSB/SLC8A1/SDC1/P2RY1/RYR1/APEX1/HSPA5/PKLR/BIRC2/P2RX6/PTK2B/FBP1/PRKAA1/SRD5A1/KCNE1/RAP1A	45	BP
GO:0032868	response to insulin	63/1159	269/18903	9.265e-21	2.61e-19	9.24927e-20	IL1B/TLR2/PPARG/STAT1/LYN/MAPK14/PARP1/FOS/SRC/GPT/HSD11B2/ENPP1/MTOR/ABCC8/MC4R/GAB1/COL1A1/NCOA1/PKM/PRKCQ/SIRT1/AKT1/PDPK1/CRY1/CRY2/AGT/PIK3C2A/PRKCD/IGF1R/CFLAR/EGR1/PRKDC/KCNQ1/APC/SLC2A1/PPARA/OPRK1/ALPL/CTSK/GSK3B/INSR/PIK3R1/CDK4/FOXC2/YWHAG/PIK3CA/PKLR/XBP1/ADIPOR1/RPS6KB1/SHC1/SLC22A12/FBP1/PCSK9/PRKAA1/SORT1/PIP4K2A/SLC27A1/GRB2/PTPN1/IRS1/SRD5A1/ESRRA	63	BP
GO:0002460	adaptive immune response based on somatic recombination of immune receptors built from immunoglobulin superfamily domains	76/1159	375/18903	9.85235e-21	2.76e-19	9.79051e-20	TNF/IL12B/IL4R/IL4/TGFB1/TLR4/IL6/IL33/IL1B/IL18/ICAM1/LTA/NOD2/IL6R/MBL2/IL1R1/HLA-DQA1/NLRP3/ARG1/C3/IL12RB1/CD80/SLC11A1/HMGB1/TNFSF4/CCR2/CCR6/BTK/AHR/TNFSF13B/CLEC7A/CCL19/RORA/JAK2/LIG4/MTOR/ADAM17/RORC/JAK3/TRAF6/CTSC/TFRC/NFKB2/NOTCH1/HSPD1/CLU/PRKCQ/MALT1/RIPK2/CD274/CXCL13/BCL6/PTPRC/CR1/PRKCD/MAP3K7/PHB1/IFNA2/PRF1/NBN/PTPN6/ERCC1/JAG1/HPRT1/TP53BP1/CD81/TRAF3IP2/LEF1/EXO1/C1S/INPP5D/D…	76	BP
GO:0051896	regulation of protein kinase B signaling	52/1159	189/18903	1.10057e-20	3.07e-19	1.08867e-19	TNF/TGFB1/IL18/CX3CR1/EGFR/ANGPT1/XDH/ITGB1/CCR7/HSP90AA1/SRC/CCL19/TGFBR1/CX3CL1/FGFR1/MTOR/AKR1C3/PTEN/GPX1/DDIT3/NRG1/CCL21/P2RY12/SIRT1/F3/F10/HAX1/NOX4/MC1R/IGF1R/PHB1/PPARA/TEK/HBEGF/NTRK1/THBS1/DAG1/PTK2/INSR/PDGFA/PARK7/PHLPP1/DRD2/PIK3CA/EPHA2/TCF7L2/DRD3/LIN28A/TPBG/GPER1/HPSE/CIB1	52	BP
GO:0002703	regulation of leukocyte mediated immunity	59/1159	241/18903	1.56515e-20	4.34e-19	1.54118e-19	TNF/IL12B/IL4R/IL4/TGFB1/TLR4/IL6/IL1B/IL18/ICAM1/LTA/NOS2/NOD2/TLR9/IL1R1/HMOX1/ITGB2/NLRP3/ARG1/C3/IL12RB1/CX3CR1/TLR3/F2RL1/ITGAM/HMGB1/LYN/TNFSF4/CCR2/BTK/AHR/CLEC7A/PLCG2/MAVS/JAK3/TRAF6/TFRC/RAC2/HSPD1/MALT1/PDPK1/BCL6/DDX1/PTPRC/KIT/CR1/MAP3K7/CXCL6/IFNA2/DNASE1/PTPN6/TP53BP1/CD81/RASGRP1/SPHK2/KLRK1/DUSP22/HLA-DRB3/TNFSF13	59	BP
GO:1902107	positive regulation of leukocyte differentiation	51/1159	184/18903	1.81551e-20	4.99e-19	1.7716e-19	TNF/IL12B/IL4R/IL4/TGFB1/IL18/NLRP3/CD86/CSF1/IL12RB1/CD80/HMGB1/TNFSF4/CASP8/CREB1/PRKCA/BTK/RHOA/CCR1/FOS/CCL19/SHH/FOXO3/TRAF6/RUNX1/VSIR/MALT1/RIPK2/HAX1/BCL6/PTPRC/DUSP10/CR1/PRKDC/MMP14/VNN1/SMARCA4/IL1RL2/ACTB/SMARCD2/BRD7/RARA/RASGRP1/LEF1/KAT5/RIPK1/XBP1/INPP5D/GPR68/CD74/KLF10	51	BP
GO:1903708	positive regulation of hemopoiesis	51/1159	184/18903	1.81551e-20	4.99e-19	1.7716e-19	TNF/IL12B/IL4R/IL4/TGFB1/IL18/NLRP3/CD86/CSF1/IL12RB1/CD80/HMGB1/TNFSF4/CASP8/CREB1/PRKCA/BTK/RHOA/CCR1/FOS/CCL19/SHH/FOXO3/TRAF6/RUNX1/VSIR/MALT1/RIPK2/HAX1/BCL6/PTPRC/DUSP10/CR1/PRKDC/MMP14/VNN1/SMARCA4/IL1RL2/ACTB/SMARCD2/BRD7/RARA/RASGRP1/LEF1/KAT5/RIPK1/XBP1/INPP5D/GPR68/CD74/KLF10	51	BP
GO:0051047	positive regulation of secretion	67/1159	304/18903	1.83364e-20	5.02e-19	1.78127e-19	IL4R/IL4/TGFB1/TLR4/IL1B/TLR2/IL1A/ITGB2/MIF/PPARG/F2RL1/TRPV1/ITGAM/TACR1/CREB1/CXCL12/ADORA1/CD38/BMP6/JAK2/SPP1/CASR/BMP2/ANO1/PTGES/HIF1A/EDNRB/ANXA2/FGG/P2RY2/AIMP1/AGT/NR1H2/AQP1/ANG/OPRK1/CNR1/TRPM2/SLC12A2/ACHE/RBP4/SDC1/P2RY1/GCG/PCSK1/CYP4F2/PFKM/VPS4B/DRD2/GALR1/CACNA1H/SPHK2/XBP1/OSBP/GRK2/TCF7L2/DRD3/PPIA/GPR68/DNM1L/GABBR1/PPARD/GPER1/FFAR4/SNCA/FFAR1/NPR1	67	BP
GO:0061900	glial cell activation	28/1159	54/18903	3.29783e-20	8.99e-19	3.18935e-19	TNF/IL4/IL6/IL33/IL1B/TLR2/TLR9/ITGB2/C5AR1/JUN/CX3CR1/TLR3/IFNGR2/TRPV1/ITGAM/MMP8/CX3CL1/JAK2/CTSC/LRP1/NR1D1/CLU/PTPRC/ATM/LRRK2/MAPT/SPHK1/SNCA	28	BP
GO:0002221	pattern recognition receptor signaling pathway	51/1159	187/18903	3.97121e-20	1.08e-18	3.82351e-19	TNF/IRAK3/CD14/TLR4/TLR2/NOD2/TLR9/MBL2/NOD1/IRF1/NLRP3/TLR1/TLR3/F2RL1/HMGB1/NFKBIA/LYN/LTF/TLR5/BTK/IRAK1/CASP1/ESR1/PLCG2/TRAF6/IFIH1/CAV1/NR1D1/HSPD1/HSPA1A/RPS6KA3/BIRC3/CTSS/IRAK4/XIAP/RIPK2/NLRP1/PDPK1/RELA/LY96/MAP3K7/PHB1/USP15/ITCH/IRGM/BIRC2/FLOT1/OAS1/MAPKAPK2/IRAK2/NR1H3	51	BP
GO:0042113	B cell activation	72/1159	350/18903	4.37468e-20	1.18e-18	4.19333e-19	IL4/TGFB1/TLR4/IL6/VCAM1/NOD2/TLR9/CD86/MIF/LYN/TNFSF4/CASP8/CCR6/ITGB1/BTK/AHR/TNFRSF4/TNFSF13B/CD38/CASP3/LIG4/ADAM17/PLCG2/JAK3/PTEN/TFRC/TP53/EP300/BAX/CXCR5/ICOSLG/HSPD1/MS4A1/MALT1/LGALS1/BCL6/PTPRC/KIT/ABL1/CR1/PRKCD/FNIP1/PHB1/PRKDC/MMP14/ATM/IFNA2/NTRK1/NBN/CDKN1A/BST1/SFRP1/PTPN6/ERCC1/PIK3R1/TP53BP1/CD81/RASGRP1/TRAF3IP2/LEF1/EXO1/IFNA6/XBP1/BAK1/CTPS1/PTK2B/INPP5D/TOP2B/DCAF1/BMI1/CD7…	72	BP
GO:0001667	ameboidal-type cell migration	88/1159	492/18903	4.89834e-20	1.32e-18	4.6673e-19	TNF/IL4/TGFB1/PTGS2/NOS3/HMOX1/EDNRA/NFE2L2/JUN/PPARG/ITGB3/HMGB1/TACR1/ANGPT1/DPP4/PRKCA/ITGB1/RHOA/LTB4R2/VEGFA/SRC/TGFBR1/FGFR1/SHH/MTOR/ADAM17/PLCG2/PTEN/ITGB4/APOA1/GPX1/ACVRL1/NOTCH1/ERBB4/HSPB1/HIF1A/KDR/EDNRB/CYP1B1/P2RY12/SIRT1/AKT1/HYAL1/PDPK1/GJA1/CXCL13/DOCK1/AGT/ACVR1/DUSP10/KIT/PIK3C2A/ABL1/CSNK2B/RAC1/TEK/AQP1/NR4A1/CDH13/PLEC/HBEGF/THBS1/PTK2/BMPER/SLC8A1/PIP5K1A/SMURF2/HDAC6/FOXC…	88	BP
GO:0007584	response to nutrient	46/1159	154/18903	4.91223e-20	1.32e-18	4.6673e-19	LTA/VCAM1/PTGS2/NOD2/IL1A/HMOX1/ARG1/CXCL10/PPARG/NQO1/STAT1/VDR/SOD2/MTOR/CYP27B1/CYBB/CYP1A1/SPP1/AKR1C3/CCND1/TFRC/CASR/GPX1/COL1A1/NCOA1/CYP1B1/CBS/BECN1/IGF1R/CYP26A1/ALPL/CNR1/SFRP1/SLC34A1/ALDH1A2/SLC8A1/RARA/ERCC1/SLC16A1/PKLR/XBP1/RPS6KB1/UGT1A1/BCHE/PIM1/PPARD	46	BP
GO:0042063	gliogenesis	67/1159	310/18903	5.61175e-20	1.5e-18	5.30866e-19	TNF/TGFB1/TLR4/IL6/IL33/IL1B/TLR2/LTA/CCL2/C5AR1/CSF1/CX3CR1/LYN/HDAC2/CCR2/CXCR4/CHRM1/RHOA/MAPK3/HDAC1/SOD1/MAPK1/CX3CL1/SHH/CTNNB1/MTOR/ABCC8/PTEN/ITGB4/TP53/ERBB2/NOTCH1/BMP2/ANO1/LRP1/NR1D1/CLU/NRG1/P2RY12/AKT1/F2/CSF1R/GBA1/DUSP10/ABL1/MMP14/HEXB/PLEC/MAP2K1/DAG1/P2RY1/LEF1/HES1/FGF5/KRAS/E2F1/DRD1/PTK2B/TRPC4/MAPT/PRKCH/DRD3/SLC7A5/LIN28A/ILK/ADGRG6/CDK1	67	BP
GO:0016032	viral process	80/1159	421/18903	5.90988e-20	1.57e-18	5.56637e-19	TNF/CXCL8/CCL5/ICAM1/CCL2/CCR5/MBL2/CD86/CD80/JUN/ITGB3/STAT1/HMGB1/EGFR/LTF/DPP4/CXCR4/ITGB1/TNFRSF4/ACE2/SELPLG/HDAC1/LIG4/MAVS/IFIH1/TFRC/TP53/CAV1/NOTCH1/EP300/CD209/APOBEC3C/CFL1/HSPA1A/HMGA2/AGTR1/LGALS1/MRC1/CSF1R/ANPEP/CR1/PHB1/PRMT1/PPARA/PTBP1/SLC1A5/HSPA8/IFNA2/SMARCA4/CTSB/DAG1/GSK3B/ITCH/INSR/SETDB1/CCNT1/BCL2L1/RPSA/CD81/LEF1/VPS4B/RAN/PABPC1/JPT2/ST6GAL1/EPHA2/NPC1/EEF1A1/GRK2/PIKF…	80	BP
GO:0071453	cellular response to oxygen levels	49/1159	175/18903	6.37928e-20	1.69e-18	5.98248e-19	PTGS2/HMOX1/NFE2L2/PPARG/VEGFA/IRAK1/FOS/SRC/RORA/FAS/MTOR/CYBB/FOXO3/PTEN/TP53/CAV1/CASR/NOTCH1/HIF1A/ENO1/SIRT1/KCNMB1/MYC/AKT1/CBS/ATP7A/MDM2/CFLAR/EGR1/STUB1/AQP1/ATG7/NOX1/PGK1/HYOU1/SFRP1/FABP1/SLC8A1/CCNA2/KCNK3/ROCK2/E2F1/EPAS1/PRKAA1/SUV39H1/EGLN2/SCN2A/PPARD/DDAH1	49	BP
GO:0030593	neutrophil chemotaxis	38/1159	106/18903	7.2662e-20	1.91e-18	6.78487e-19	CXCL8/CCL5/IL1B/CCL2/CCL17/CCL24/NOD2/CCL26/ITGB2/CCL22/CXCL10/C5AR1/CXCR1/CXCR2/DPP4/CXCL1/CCR7/CXCL5/PDE4B/CCL19/CX3CL1/CCL20/TREM1/RAC2/CCL21/CXCL13/CCL15/CXCL2/CXCL3/RAC1/CXCL11/CXCL6/BST1/PIKFYVE/PPIA/ITGA1/DNM1L/CD74	38	BP
GO:0032946	positive regulation of mononuclear cell proliferation	45/1159	149/18903	7.68404e-20	2.01e-18	7.14423e-19	IL12B/IL4/CCL5/TLR4/IL6/IL1B/IL18/VCAM1/TLR9/IL1A/CD86/MIF/CSF1/IL12RB1/CD80/HMGB1/TNFSF4/CCR2/TACR1/BTK/TNFRSF4/TNFSF13B/CD38/CCL19/JAK2/SHH/JAK3/TRAF6/TFRC/CD209/ICOSLG/PRKCQ/RIPK2/CD274/BCL6/PTPRC/PDCD1LG2/CDKN1A/BST1/BCL2L1/CD81/HES1/ST6GAL1/BMI1/CD74	45	BP
GO:0051209	release of sequestered calcium ion into cytosol	41/1159	124/18903	8.03904e-20	2.1e-18	7.44235e-19	CCR5/NOS1/TRPA1/CXCL10/PDE4D/ITGB3/TRPV1/LYN/CCR7/F2R/LCK/CCL19/CX3CL1/PLCG2/DDIT3/BAX/GSTO1/CCL21/BDKRB1/CACNA1C/F2/ITPR1/PDPK1/ITPR2/PTPRC/ABL1/FLNA/CXCL11/TRPM2/SLC8A1/RYR1/PTPN6/DRD2/PRKACA/DIAPH1/DRD1/PTK2B/GPER1/SNCA/PLCG1/CALM1	41	BP
GO:0001774	microglial cell activation	26/1159	47/18903	8.26212e-20	2.15e-18	7.61633e-19	TNF/IL4/IL6/IL33/TLR2/TLR9/ITGB2/C5AR1/JUN/CX3CR1/TLR3/IFNGR2/TRPV1/ITGAM/MMP8/CX3CL1/JAK2/CTSC/NR1D1/CLU/PTPRC/ATM/LRRK2/MAPT/SPHK1/SNCA	26	BP
GO:0051208	sequestering of calcium ion	42/1159	131/18903	1.06733e-19	2.76e-18	9.79738e-19	CCR5/NOS1/TRPA1/CXCL10/PDE4D/ITGB3/TRPV1/LYN/CCR7/F2R/LCK/CCL19/CX3CL1/PLCG2/DDIT3/BAX/GSTO1/CCL21/BDKRB1/CACNA1C/F2/ITPR1/PDPK1/ITPR2/PTPRC/ABL1/FLNA/CXCL11/TRPM2/HSP90B1/SLC8A1/RYR1/PTPN6/DRD2/PRKACA/DIAPH1/DRD1/PTK2B/GPER1/SNCA/PLCG1/CALM1	42	BP
GO:0051283	negative regulation of sequestering of calcium ion	41/1159	125/18903	1.127e-19	2.9e-18	1.03014e-18	CCR5/NOS1/TRPA1/CXCL10/PDE4D/ITGB3/TRPV1/LYN/CCR7/F2R/LCK/CCL19/CX3CL1/PLCG2/DDIT3/BAX/GSTO1/CCL21/BDKRB1/CACNA1C/F2/ITPR1/PDPK1/ITPR2/PTPRC/ABL1/FLNA/CXCL11/TRPM2/SLC8A1/RYR1/PTPN6/DRD2/PRKACA/DIAPH1/DRD1/PTK2B/GPER1/SNCA/PLCG1/CALM1	41	BP
GO:0046879	hormone secretion	64/1159	291/18903	1.50247e-19	3.85e-18	1.36757e-18	TNF/ALOX5/CCL5/IL6/IL1B/NOS2/IL1RN/SMAD2/PPARG/CRHR1/LYN/TACR1/CREB1/ADORA1/BTK/CD38/KCNJ11/BMP6/JAK2/SPP1/ABCC8/CASR/ANO1/MC4R/HIF1A/NR1D1/AGTR1/FGG/GJA1/AIMP1/CRY1/CRY2/AGT/GLP1R/ADRA2A/RAF1/KCNQ1/AQP1/REN/OPRK1/CNR1/TRPM2/SFRP1/RBP4/PARK7/P2RY1/GCG/PFKM/DRD2/SLC16A1/GALR1/SSTR5/HNF4A/PFKL/OSBP/TCF7L2/CCKAR/GPR68/GABBR1/IRS1/PPARD/GPER1/FFAR4/FFAR1	64	BP
GO:0034764	positive regulation of transmembrane transport	57/1159	237/18903	1.74883e-19	4.47e-18	1.58515e-18	ADRB2/CCL2/NOS1/CXCL10/EDNRA/C3/NFE2L2/IFNGR2/CCR2/ABCB1/MAPK14/ITGB1/ACE2/F2R/NPPA/CX3CL1/PLCG2/G6PD/ABCC8/CAV1/BAX/GSTO1/CTSS/ADCYAP1R1/MS4A1/BDKRB1/KCNMB1/AKT1/F2/PDPK1/AGT/ABL1/FLNA/KCNQ1/CXCL11/OPRK1/P2RX1/SLC26A6/SLC34A1/INSR/PIK3R1/WNK1/KCNK3/CACNA2D1/ATP2A1/BAK1/CA2/KCNA1/DRD1/NR4A3/SLC7A5/IRS1/GPER1/SNCA/PLCG1/CALM1/KCNE1	57	BP
GO:0002440	production of molecular mediator of immune response	69/1159	333/18903	1.77918e-19	4.53e-18	1.60594e-18	TNF/IL4R/IL4/IRAK3/TGFB1/TLR4/IL6/IL33/IL1B/IL18/NOD2/TLR9/IL17F/NOD1/IL1R1/HLA-DQA1/HMOX1/NLRP3/CD86/ARG1/MIF/TLR3/F2RL1/TNFSF4/CCR2/ANGPT1/CCR6/BTK/TNFRSF4/CLEC7A/LIG4/PLCG2/MAVS/JAK3/TRAF6/TFRC/TREM1/APOA1/HSPD1/SIRT1/MALT1/RIPK2/BCL6/DDX1/PTPRC/KIT/CR1/MAP3K7/PHB1/PRKDC/IFNA2/NBN/RBP4/SAMHD1/ERCC1/TP53BP1/CD81/TRAF3IP2/EXO1/SPHK2/XBP1/HK1/CGAS/NR4A3/SLC7A5/HLA-DRB3/MAPKAPK2/CD74/TNFSF13	69	BP
GO:0048144	fibroblast proliferation	37/1159	103/18903	2.05847e-19	5.21e-18	1.85033e-18	GSTP1/LTA/MIF/JUN/ITGB3/EGFR/SOD2/LIG4/CTNNB1/ESR1/TP53/CAV1/GPX1/BAX/MYC/AGT/ABL1/ZMPSTE24/AQP1/CDKN1A/SFRP1/PDGFA/PRDX1/KMT2A/PDGFRB/CCNA2/CDK4/E2F1/PEX2/MED25/CD248/BMI1/EREG/SPHK1/HRAS/CDK1/CD74	37	BP
GO:0003015	heart process	60/1159	261/18903	2.1069e-19	5.31e-18	1.88604e-18	TNF/NOS3/NOS1/EDNRA/PDE4D/TRPV1/ADORA1/CXCR4/CCN2/ACE2/ADORA3/HSP90AA1/FYN/PDE4B/SRC/ATP2A2/SOD1/NPPA/JAK2/CALCA/MTOR/CAV1/GPX1/GSTO1/ADRB1/EDNRB/CACNA1C/GJA1/ATP2A3/AGT/NOX4/GLP1R/ZMPSTE24/MDM2/FLNA/KCNQ1/HBEGF/THRB/SLC8A1/THRA/MYH7/ATP1A1/CACNA2D1/PDE5A/DRD2/ATP2A1/TPM1/PIK3CA/CACNA1H/ADRA1A/PRKACA/CDC42/EPAS1/GRK2/SCN1A/KCNJ5/DNM1L/YAP1/CALM1/KCNE1	60	BP
GO:0051282	regulation of sequestering of calcium ion	41/1159	127/18903	2.18955e-19	5.5e-18	1.95195e-18	CCR5/NOS1/TRPA1/CXCL10/PDE4D/ITGB3/TRPV1/LYN/CCR7/F2R/LCK/CCL19/CX3CL1/PLCG2/DDIT3/BAX/GSTO1/CCL21/BDKRB1/CACNA1C/F2/ITPR1/PDPK1/ITPR2/PTPRC/ABL1/FLNA/CXCL11/TRPM2/SLC8A1/RYR1/PTPN6/DRD2/PRKACA/DIAPH1/DRD1/PTK2B/GPER1/SNCA/PLCG1/CALM1	41	BP
GO:0007599	hemostasis	56/1159	231/18903	2.45212e-19	6.13e-18	2.17708e-18	TLR4/IL6/NOS3/SERPINE1/NFE2L2/F2RL1/ITGB3/LYN/PRKCA/MAPK14/F2R/LCK/SRC/PRKG1/JAK2/SHH/THBD/PLCG2/CAV1/HSPB1/PRKCQ/P2RY12/ANXA2/F3/F10/FGG/F2/ADRA2A/PRKCD/FLNA/THBS1/ACTB/P2RX1/ENTPD1/PDGFA/P2RY1/LMAN1/PTPN6/CYP4F2/PRDX2/FLI1/PABPC4/PIK3CA/SLC7A11/TPH1/HNF4A/AVPR2/ITPK1/ENTPD2/PDPN/ILK/PPIA/F12/HPSE/CSRP1/ADRA2C	56	BP
GO:0042391	regulation of membrane potential	80/1159	431/18903	2.61229e-19	6.51e-18	2.30981e-18	ADRB2/TNF/TRPV1/TACR1/ADORA1/CHRM1/PARP1/OPRM1/SRC/ATP2A2/SOD2/SOD1/KCNJ11/NPPA/MTOR/PTEN/CAV1/BAX/KDR/ADRB1/SCN4A/CACNA1C/AKT1/GJA1/GBA1/ABL1/ZMPSTE24/FLNA/DVL1/CNR2/KCNQ1/GRM1/CNR1/CHRNA1/BID/GSK3B/P2RX1/SLC34A1/SLC8A1/PARK7/GRM5/ASIC1/KMT2A/BCL2L1/KCNMA1/KCNK3/ATP1A1/CACNA2D1/DRD2/CACNA1H/LRRK2/ADRA1A/BAK1/KCNA1/GABRG2/KIF5B/DRD1/PYCR1/P2RX6/PTK2B/PIEZO1/GRIN2A/MAPT/GABRB3/GRIK1/SLMAP/NTSR2/SC…	80	BP
GO:0048145	regulation of fibroblast proliferation	34/1159	87/18903	2.6725e-19	6.63e-18	2.35345e-18	GSTP1/LTA/MIF/JUN/ITGB3/EGFR/SOD2/LIG4/CTNNB1/ESR1/TP53/CAV1/BAX/MYC/AGT/ABL1/ZMPSTE24/AQP1/CDKN1A/SFRP1/PDGFA/KMT2A/PDGFRB/CCNA2/CDK4/E2F1/PEX2/MED25/CD248/BMI1/EREG/SPHK1/HRAS/CD74	34	BP
GO:0045471	response to ethanol	41/1159	128/18903	3.03481e-19	7.5e-18	2.66169e-18	TNF/CD14/VCAM1/NQO1/CRHR1/HDAC2/CASP8/TACR1/RHOA/FYN/OPRM1/FOS/SOD2/SOD1/CYBB/G6PD/CCND1/ADCYAP1R1/KCNMB1/ITPR2/IGF1R/MAOB/PPARA/OPRK1/CNR1/CTSK/TBXAS1/RARA/DRD2/PSMD14/BAK1/RPS6KB1/ST6GAL1/BIRC2/UGT1A1/PTK2B/GRIN2A/PRKAA1/HPGD/GABBR1/CDK1	41	BP
GO:0045619	regulation of lymphocyte differentiation	53/1159	210/18903	3.30134e-19	8.13e-18	2.88377e-18	IL12B/IL4R/IL4/IL18/TLR9/IRF1/NLRP3/CD86/IL12RB1/CD80/HMGB1/TNFSF4/CCR2/BTK/RHOA/CCL19/SOD1/SHH/FOXO3/JAK3/RUNX1/ERBB2/VSIR/MALT1/RIPK2/BCL6/PTPRC/DUSP10/ABL1/CR1/PRKDC/MMP14/IFNA2/VNN1/SMARCA4/IL1RL2/ACTB/SFRP1/SMARCD2/BRD7/PRDM1/PTPN6/RARA/SOS1/PRDX2/RASGRP1/LEF1/KAT5/XBP1/TCF7/INPP5D/ZEB1/CD74	53	BP
GO:0043523	regulation of neuron apoptotic process	54/1159	218/18903	3.79482e-19	9.3e-18	3.30151e-18	TNF/NR3C1/CCL2/HMOX1/JUN/CX3CR1/NQO1/ITGAM/ANGPT1/PARP1/RHOA/F2R/CASP3/CEBPB/SOD2/SOD1/CX3CL1/JAK2/LIG4/CTNNB1/G6PD/FOXO3/CCND1/TP53/DDIT3/BAX/HIF1A/KDR/GBA1/SIX1/ABL1/ATM/HYOU1/NTRK1/PPARGC1A/PARK7/CASP9/BCL2L1/BCL2L11/PIK3CA/KRAS/PPT1/SIGMAR1/PTK2B/MAP2K4/PCSK9/AKT1S1/EGLN2/ROCK1/ITGA1/MCL1/HRAS/SNCA/PAK3	54	BP
GO:0032147	activation of protein kinase activity	44/1159	148/18903	3.9184e-19	9.57e-18	3.3954e-18	ADRB2/IL12B/IL4/CCL5/IL18/IL6R/CD86/TLR3/ITGB3/SLC11A1/EGFR/ANGPT1/VEGFA/IRAK1/SRC/JAK2/CALCA/MTOR/TRAF6/NRG1/MALT1/TGFA/TNFRSF10A/PDPK1/AGT/ABL1/ADRA2A/PRKCD/MAP3K7/PHB1/ANG/HBEGF/MAP2K1/INSR/PARK7/WNK1/DRD2/PIK3CA/AXIN1/PTK2B/PPIA/EREG/FGF1/ADRA2C	44	BP
GO:2001237	negative regulation of extrinsic apoptotic signaling pathway	36/1159	99/18903	3.95954e-19	9.63e-18	3.41738e-18	TNF/IL4/GSTP1/IL1B/CSF2/ICAM1/IL1A/NOS3/SERPINE1/HMOX1/AR/SRC/TGFBR1/CX3CL1/GPX1/HSPA1A/COL2A1/AKT1/FGG/CTNNA1/ACVR1/RELA/CFLAR/RAF1/THBS1/GSK3B/PARK7/BCL2L1/PRDX2/RIPK1/BRCA1/RPS6KB1/ZMYND11/TCF7L2/MCL1/YAP1	36	BP
GO:2001236	regulation of extrinsic apoptotic signaling pathway	45/1159	155/18903	4.38029e-19	1.06e-17	3.76552e-18	TNF/IL4/GSTP1/IL1B/CSF2/ICAM1/IL1A/NOS3/SERPINE1/HMOX1/AR/SRC/TGFBR1/CX3CL1/FGFR1/PTEN/CAV1/GPX1/HSPA1A/COL2A1/AKT1/FGG/CTNNA1/AGT/PTPRC/ACVR1/RELA/CFLAR/RAF1/THBS1/BID/GSK3B/SFRP1/PARK7/BCL2L1/PRDX2/RIPK1/BRCA1/RPS6KB1/STK4/ZMYND11/TCF7L2/MCL1/YAP1/GPER1	45	BP
GO:0071260	cellular response to mechanical stimulus	31/1159	73/18903	5.60965e-19	1.35e-17	4.80327e-18	TLR4/IL33/IL1B/PTGS2/IRF1/TLR3/ITGB3/CASP8/NFKB1/TLR5/TNFRSF8/MAPK3/CASP1/BMP6/TNFRSF1A/FAS/MAPK8/COL1A1/TNFRSF10A/AGT/IGF1R/MAP3K1/SLC2A1/CHEK1/AQP1/PLEC/DAG1/BAG3/BAK1/PIEZO1/MAP2K4	31	BP
GO:1990266	neutrophil migration	41/1159	130/18903	5.76722e-19	1.39e-17	4.91875e-18	CXCL8/CCL5/IL1B/CCL2/CCL17/CCL24/NOD2/CCL26/IL1A/IL1R1/ITGB2/CCL22/CXCL10/C5AR1/CXCR1/CXCR2/DPP4/CXCL1/CCR7/CXCL5/PDE4B/CCL19/CX3CL1/CCL20/TREM1/RAC2/IRAK4/CCL21/CXCL13/CCL15/CXCL2/CXCL3/RAC1/CXCL11/CXCL6/BST1/PIKFYVE/PPIA/ITGA1/DNM1L/CD74	41	BP
GO:0097306	cellular response to alcohol	36/1159	100/18903	5.82845e-19	1.4e-17	4.95147e-18	TNFSF4/CREB1/CDH1/AHR/FOS/SOD2/PTCH1/CTNNB1/CYBB/FOXO3/GNB1/AKR1C3/SCNN1A/PRKAA2/CYP1B1/KCNMB1/AKT1/ITPR2/CTNNA1/IGF1R/SCNN1G/DAG1/SFRP1/SCNN1B/SGK1/CDK4/BRCA1/SPHK2/GNAI1/CES1/UGT1A1/ADCY1/RAD51/ACACA/FBP1/PRKAA1	36	BP
GO:1904062	regulation of cation transmembrane transport	75/1159	394/18903	8.05286e-19	1.92e-17	6.81447e-18	ADRB2/CCL2/TLR9/NOS1/ARG1/CXCL10/EDNRA/PDE4D/IFNGR2/ITGB3/CRHR1/LYN/CCR2/ITGB1/ACE2/F2R/FYN/OPRM1/PDE4B/NPPA/CX3CL1/PLCG2/G6PD/ABCC8/CAV1/BAX/GSTO1/FBXO11/CTSS/ADCYAP1R1/MS4A1/BDKRB1/KCNMB1/CACNA1C/F2/PDPK1/AGT/ATP7A/ABL1/ADRA2A/FLNA/VDAC1/CD63/KCNQ1/CXCL11/OPRK1/OXSR1/P2RX1/SLC8A1/PARK7/PTPN6/CAPN1/WNK1/KCNK3/CACNA2D1/DRD2/ATP2A1/SPHK2/BAK1/KCNA1/PRKACA/DIAPH1/DRD1/PTK2B/GRIN2A/PCSK9/PSEN2/CRBN/…	75	BP
GO:0071456	cellular response to hypoxia	44/1159	151/18903	9.28458e-19	2.21e-17	7.8262e-18	PTGS2/HMOX1/NFE2L2/PPARG/VEGFA/IRAK1/FOS/SRC/RORA/MTOR/CYBB/FOXO3/PTEN/TP53/CASR/NOTCH1/HIF1A/ENO1/SIRT1/KCNMB1/MYC/CBS/ATP7A/MDM2/CFLAR/EGR1/STUB1/AQP1/PGK1/HYOU1/SFRP1/FABP1/SLC8A1/CCNA2/KCNK3/ROCK2/E2F1/EPAS1/PRKAA1/SUV39H1/EGLN2/SCN2A/PPARD/DDAH1	44	BP
GO:0045936	negative regulation of phosphate metabolic process	80/1159	440/18903	9.51072e-19	2.25e-17	7.98574e-18	TNF/IRAK3/TGFB1/GSTP1/IL1B/JUN/PPARG/PDE4D/LYN/ANGPT1/XDH/DUSP1/PARP1/CASP3/NPPA/ENPP1/IKBKB/PTEN/TP53/CAV1/BMP2/BAX/HSPB1/LRP1/BDKRB1/SIRT1/AKT1/CDKN2A/CEBPA/PDPK1/CRY2/DKK1/AGT/PTPRC/GBA1/DUSP10/ABL1/PRKCD/PRKDC/DVL1/APC/PPARA/SMYD3/FABP4/PLEC/CDKN1A/MEN1/GSK3B/PLK1/HMGCR/SFRP1/SLC8A1/PDGFA/PARK7/PTPN6/YWHAB/DRD2/YWHAG/SFN/DNAJA1/IPO7/LPCAT1/LRRK2/BAK1/ROCK2/FBP1/MAPT/PIP4K2A/AKT1S1/PPP1R15A/DU…	80	BP
GO:0010563	negative regulation of phosphorus metabolic process	80/1159	441/18903	1.0951e-18	2.58e-17	9.1596e-18	TNF/IRAK3/TGFB1/GSTP1/IL1B/JUN/PPARG/PDE4D/LYN/ANGPT1/XDH/DUSP1/PARP1/CASP3/NPPA/ENPP1/IKBKB/PTEN/TP53/CAV1/BMP2/BAX/HSPB1/LRP1/BDKRB1/SIRT1/AKT1/CDKN2A/CEBPA/PDPK1/CRY2/DKK1/AGT/PTPRC/GBA1/DUSP10/ABL1/PRKCD/PRKDC/DVL1/APC/PPARA/SMYD3/FABP4/PLEC/CDKN1A/MEN1/GSK3B/PLK1/HMGCR/SFRP1/SLC8A1/PDGFA/PARK7/PTPN6/YWHAB/DRD2/YWHAG/SFN/DNAJA1/IPO7/LPCAT1/LRRK2/BAK1/ROCK2/FBP1/MAPT/PIP4K2A/AKT1S1/PPP1R15A/DU…	80	BP
GO:0036294	cellular response to decreased oxygen levels	45/1159	159/18903	1.32568e-18	3.11e-17	1.10455e-17	PTGS2/HMOX1/NFE2L2/PPARG/VEGFA/IRAK1/FOS/SRC/RORA/MTOR/CYBB/FOXO3/PTEN/TP53/CASR/NOTCH1/HIF1A/ENO1/SIRT1/KCNMB1/MYC/AKT1/CBS/ATP7A/MDM2/CFLAR/EGR1/STUB1/AQP1/PGK1/HYOU1/SFRP1/FABP1/SLC8A1/CCNA2/KCNK3/ROCK2/E2F1/EPAS1/PRKAA1/SUV39H1/EGLN2/SCN2A/PPARD/DDAH1	45	BP
GO:0051098	regulation of binding	72/1159	372/18903	1.57592e-18	3.69e-17	1.30803e-17	ADRB2/TGFB1/SMAD3/SMAD2/HMOX1/JUN/PPARG/HMGB1/NFKBIA/HDAC2/ANGPT1/PON1/PARP1/MMP8/MAPK3/SRC/TGFBR1/ATP2A2/JAK2/CTNNB1/TRAF6/CAV1/EP300/DDIT3/BMP2/BAX/MAPK8/LRP1/HMGA2/ANXA2/RIPK2/GZMA/NSD1/AKT1/PIN1/TNKS/DKK1/ATP2A3/ABL1/ZMPSTE24/PRKCD/STUB1/DVL1/CSNK2B/PKD1/PPARA/CDKN1A/MEN1/GSK3B/PLK1/ACTB/PARK7/P2RY1/GCG/RARA/LEF1/HES1/RAN/NME1/LRRK2/STK4/E2F1/PRKACA/AURKA/CDC42/NEK2/FLOT1/PCSK9/TCF7L2/MED25/R…	72	BP
GO:0042593	glucose homeostasis	57/1159	248/18903	1.72078e-18	4.01e-17	1.42281e-17	ALOX5/IL6/ICAM1/PPARG/PTCH1/ABCC8/FOXO3/CASR/GPX1/ANO1/HIF1A/NR1D1/PRKAA2/SIRT1/AKT1/CEBPA/CRY1/CRY2/CMKLR2/NOX4/ADRA2A/IGF1R/RAF1/SMARCA4/OPRK1/NCF1/G6PC1/CNR1/PPARGC1A/MEN1/RBP4/INSR/PARK7/GCG/PFKM/PIK3R1/KAT5/SLC16A1/PIK3CA/XBP1/ADIPOR1/HK1/HNF4A/PRKACA/SERPINF1/OSBP/PRKAA1/PYGL/TCF7L2/LIN28A/OAS1/GPR68/SUCNR1/IRS1/PPARD/GPER1/FFAR1	57	BP
GO:0034341	response to interferon-gamma	42/1159	140/18903	1.73607e-18	4.03e-17	1.42999e-17	TNF/IL12B/CCL5/TLR4/TLR2/NOS2/CCL2/CCL17/JAK1/CCL24/CCL26/IRF1/CCL22/ARG1/IL12RB1/PPARG/TLR3/IFNGR2/STAT1/SLC11A1/CCL19/CASP1/CX3CL1/JAK2/CCL20/CYP27B1/TP53/CCL21/MRC1/CCL15/NR1H2/SLC26A6/IRGM/FLNB/HCK/RPS6KB1/CDC42/KIF5B/IFITM1/NR1H3/SNCA/CD74	42	BP
GO:0032355	response to estradiol	39/1159	121/18903	1.76972e-18	4.09e-17	1.45219e-17	TGFB1/PTGS2/NQO1/CASP8/EGFR/TACR1/MMP2/CCN2/CD38/CASP3/PTCH1/CTNNB1/ESR1/CCND1/GPX1/COL1A1/GPX4/ADCYAP1R1/CYP1B1/AGT/IGF1R/CFLAR/SFRP1/SLC34A1/ALDH1A2/PDGFA/CASP9/RARA/PDGFRB/CCNA2/KAT5/BCL2L11/ESR2/UGT1A1/NCOA3/HPGD/SRD5A1/GPER1/ESRRA	39	BP
GO:0010950	positive regulation of endopeptidase activity	47/1159	174/18903	1.82065e-18	4.19e-17	1.48834e-17	TNF/SMAD3/NOD1/NLRP3/PPARG/HMGB1/LYN/CASP8/XDH/CCN2/RHOA/F2R/LCK/FYN/CLEC7A/CASP1/FAS/JAK2/BAX/HSPD1/VSIR/SIRT1/MALT1/MYC/RIPK2/F3/NLRP1/MAP3K5/ATP2A3/CR1/CFLAR/DLC1/BID/P2RX1/CASP9/SENP1/BCL2L11/PSMD14/ADRM1/HSPE1/BAK1/ROCK2/GRIN2A/MAPT/PICALM/GPER1/SNCA	47	BP
GO:0002573	myeloid leukocyte differentiation	53/1159	218/18903	1.98566e-18	4.56e-17	1.61713e-17	TNF/IL12B/IL4/TGFB1/TLR4/TLR2/CSF2/CSF1/JUN/PPARG/TLR3/F2RL1/LYN/CASP8/CREB1/LTF/PRKCA/MAPK14/CCR7/PARP1/VEGFA/CCR1/CEBPB/FOS/SRC/CCL19/CTNNB1/MTOR/TRAF6/RUNX1/TFRC/TF/ANXA2/SIRT1/MYC/CEBPA/HAX1/CSF1R/GBA1/KIT/SFRP1/RARA/PIK3R1/CD81/LEF1/RIPK1/EPHA2/CDC42/INPP5D/GPR68/ESRRA/CD74/KLF10	53	BP
GO:0042445	hormone metabolic process	56/1159	241/18903	2.01725e-18	4.61e-17	1.6367e-17	PLA2G7/NR3C1/NFKB1/DPP4/CYP3A4/MME/CYP1A2/ACE2/BMP6/SHH/ESR1/CYP27B1/CYP1A1/SPP1/AKR1C3/BMP2/HIF1A/EDNRB/SULT1A1/CYP1B1/CYP2C9/AKR1B1/ZMPSTE24/IGF1R/EGR1/CYP26A1/STUB1/ECE1/REN/DUOX1/CYP2C8/HSD3B1/ADH1C/CTSB/CTSK/HSD17B4/RBP4/ALDH1A2/SCNN1B/PCSK1/CYP21A2/ARNT/ADH1B/ATP1A1/CYP17A1/CACNA1H/DGAT1/UGT1A1/BCHE/TCF7L2/PNPLA2/HSD17B1/AFP/TTR/SRD5A1/AKR1C1	56	BP
GO:0033500	carbohydrate homeostasis	57/1159	249/18903	2.10267e-18	4.79e-17	1.69965e-17	ALOX5/IL6/ICAM1/PPARG/PTCH1/ABCC8/FOXO3/CASR/GPX1/ANO1/HIF1A/NR1D1/PRKAA2/SIRT1/AKT1/CEBPA/CRY1/CRY2/CMKLR2/NOX4/ADRA2A/IGF1R/RAF1/SMARCA4/OPRK1/NCF1/G6PC1/CNR1/PPARGC1A/MEN1/RBP4/INSR/PARK7/GCG/PFKM/PIK3R1/KAT5/SLC16A1/PIK3CA/XBP1/ADIPOR1/HK1/HNF4A/PRKACA/SERPINF1/OSBP/PRKAA1/PYGL/TCF7L2/LIN28A/OAS1/GPR68/SUCNR1/IRS1/PPARD/GPER1/FFAR1	57	BP
GO:0042129	regulation of T cell proliferation	48/1159	182/18903	2.30021e-18	5.22e-17	1.85241e-17	IL12B/IL4/CCL5/IL6/IL1B/IL18/VCAM1/IL1A/IRF1/CD86/ARG1/IL12RB1/CD80/HMGB1/TNFSF4/CCR2/IDO1/TNFSF13B/CASP3/CEBPB/CCL19/JAK2/SHH/CTNNB1/JAK3/TRAF6/PTEN/TFRC/RAC2/ERBB2/CD209/ICOSLG/VSIR/PRKCQ/RIPK2/CD274/BCL6/PTPRC/CR1/PDCD1LG2/BID/ITCH/PTPN6/SOS1/CD81/HES1/PDE5A/BMI1	48	BP
GO:0009743	response to carbohydrate	55/1159	234/18903	2.34284e-18	5.3e-17	1.87975e-17	TNF/IL1B/ICAM1/PTGS2/IL1A/SMAD2/NQO1/LYN/CCN2/RHOA/CASP3/CLEC7A/SOD2/FOXO3/CASR/GPX1/ANO1/HIF1A/NR1D1/PRKAA2/NOX4/ADRA2A/PLCB1/IGF1R/EGR1/RAF1/SMARCA4/OPRK1/NCF1/THBS1/MEN1/SLC26A6/SLC8A1/GCG/PCSK1/ERCC1/KAT5/PIK3CA/PKLR/XBP1/RPS6KB1/HNF4A/PFKL/PRKACA/SERPINF1/OSBP/PTK2B/FBP1/MAP2K4/PRKAA1/TCF7L2/LIN28A/GPR68/PPARD/GPER1	55	BP
GO:0009636	response to toxic substance	57/1159	250/18903	2.56626e-18	5.78e-17	2.05142e-17	TNF/CCL5/GSTM1/GSTP1/TLR2/PTGS2/NOS3/ALB/PTGS1/ARG1/NFE2L2/GSTT1/EPHX1/NQO1/LYN/ABCB1/CDH1/PON1/AHR/FOS/SOD2/SOD1/CYP1A1/GSTA1/ADH5/GPX1/BAX/GSTO1/PTGES/GPX4/CYP1B1/EPHX2/PRDX6/ATP7A/PRDX5/MAOB/GSTK1/DUOX1/FABP1/SDC1/PARK7/PRDX1/MGST1/ABCG2/PDGFRB/PRDX2/DRD2/BAK1/SLC7A11/RPS6KB1/CES1/RAD51/PIM1/AKR1A1/SRD5A1/CDK1/SCN9A	57	BP
GO:0010332	response to gamma radiation	27/1159	57/18903	3.24194e-18	7.28e-17	2.58201e-17	IL1A/CXCL10/PARP1/SOD2/LIG4/TP53/GPX1/BAX/MYC/PTPRC/ZMPSTE24/MDM2/EGR1/PRKDC/ATM/CDKN1A/MEN1/BCL2L1/HSPA5/BAK1/RAD51/PRKAA1/ELK1/YAP1/CHEK2/ATR/HRAS	27	BP
GO:0002819	regulation of adaptive immune response	50/1159	198/18903	3.31997e-18	7.42e-17	2.63447e-17	TNF/IL12B/IL4R/IL4/TGFB1/IL6/IL33/IL1B/IL18/LTA/NOD2/IL1R1/IRF1/ALOX15/NLRP3/ARG1/C3/IL12RB1/CD80/SLC11A1/HMGB1/TNFSF4/CCR2/BTK/AHR/TNFSF13B/CLEC7A/CCL19/JAK2/JAK3/TRAF6/TFRC/HSPD1/PRKCQ/SIRT1/MALT1/RIPK2/CD274/BCL6/PTPRC/DUSP10/CR1/MAP3K7/IFNA2/PTPN6/TP53BP1/CD81/DUSP22/HLA-DRB3/TNFSF13	50	BP
GO:0071675	regulation of mononuclear cell migration	39/1159	123/18903	3.38051e-18	7.53e-17	2.67272e-17	TNF/IL4/PLA2G7/CCL5/CCL2/SERPINE1/CXCL10/C5AR1/CSF1/CX3CR1/ITGB3/HMGB1/LYN/CCR2/CXCL12/CCR6/DUSP1/CCR7/RHOA/MAPK3/CCR1/MAPK1/CCL20/ADAM17/FPR2/CCL21/AKT1/CXCL13/CSF1R/ABL1/PLCB1/OXSR1/THBS1/PTK2/WNK1/PTK2B/KLRK1/MADCAM1/CMKLR1	39	BP
GO:0002064	epithelial cell development	52/1159	213/18903	3.44267e-18	7.64e-17	2.71197e-17	TNF/IL1B/ICAM1/IL1A/EDNRA/PDE4D/F2RL1/CXCR4/VEGFA/AR/SRC/BMP6/TNFRSF1A/ST14/ESR1/IKBKB/GPX1/NOTCH1/HIF1A/KDR/RAPGEF3/EDNRB/AKT1/CEBPA/AKR1B1/TJP1/PDPK1/PLCB1/PLEC/NTRK1/HSD17B4/GSK3B/SDC1/PRDM1/RARA/FLNB/JAG1/S1PR3/FOXC2/SFN/RARB/HNF4A/EPHA2/ROCK2/EPAS1/ROCK1/S1PR2/YAP1/PGR/HPSE/KCNE1/RAP1A	52	BP
GO:0071887	leukocyte apoptotic process	38/1159	117/18903	3.61879e-18	8e-17	2.84038e-17	CCL5/IL6/NOD2/MIF/LYN/CXCR2/CXCL12/IDO1/BTK/CCR7/CASP3/CCL19/FAS/ADAM17/PDCD1/JAK3/PTEN/TP53/BAX/HIF1A/CCL21/PRKCQ/SIRT1/AKT1/CDKN2A/CD274/BCL6/FNIP1/CASP9/BCL2L1/TRAF3IP2/BCL2L11/RIPK1/BAK1/SLC7A11/ST6GAL1/CHEK2/CD74	38	BP
GO:0001655	urogenital system development	70/1159	360/18903	3.69174e-18	8.14e-17	2.88717e-17	SMAD3/IL6R/SMAD2/EDNRA/ITGB3/STAT1/CXCR2/MMP2/ANGPT1/MME/RHOA/VEGFA/AR/TGFBR1/BMP6/PTCH1/SHH/CTNNB1/ESR1/PTEN/NOTCH1/ERBB4/BMP2/BAX/EDNRB/AGTR1/MYC/AKR1B1/PSAP/AGT/EPCAM/ACVR1/SIX1/ZMPSTE24/CFLAR/EGR1/CYP26A1/PKD1/TEK/AQP1/ADAMTS1/REN/SFRP1/RBP4/SLC34A1/ALDH1A2/BMPER/SDC1/PDGFA/CASP9/PRDM1/RARA/PDGFRB/JAG1/TRAF3IP2/HES1/BCL2L11/PTCD2/FOXC2/AP1B1/LRRK2/RARB/SERPINF1/PCSK9/LIN28A/ILK/HPGD/FGF1/YAP1…	70	BP
GO:0031589	cell-substrate adhesion	71/1159	369/18903	3.84187e-18	8.44e-17	2.99378e-17	VCAM1/SMAD3/SERPINE1/ALOX15/ITGB2/ITGAL/CSF1/ITGB3/ITGAM/ANGPT1/ITGB1/CCR7/CCN2/RHOA/VEGFA/SRC/CX3CL1/JAK2/CTNNB1/PTEN/ITGB4/RAC2/APOA1/ACVRL1/NOTCH1/KDR/COL1A1/CD44/CCL21/CDKN2A/FGG/DOCK1/BCL6/ABL1/FLNA/CD63/RAC1/PKD1/MMP14/DLC1/TEK/DDR1/CDH13/THBS1/DAG1/BST1/MEN1/GSK3B/SFRP1/PTK2/PIP5K1A/JAG1/PIK3R1/ITGA2B/BCL2L11/ST6GAL1/STK4/ROCK2/CDC42/PTK2B/EPHB1/DUSP22/PDPN/ILK/MADCAM1/ROCK1/ITGA1/TRPM7/PP…	71	BP
GO:0031334	positive regulation of protein-containing complex assembly	49/1159	192/18903	4.49903e-18	9.84e-17	3.4933e-17	TNF/TGFB1/TLR4/CSF2/CCL24/CCL26/ALOX15/MMP1/CCR7/RHOA/MMP3/VEGFA/HSP90AA1/CLEC7A/SRC/ESR1/MTOR/PLCG2/TFRC/TP53/BAX/ABCA1/CLU/HSPA1A/NRG1/CCL21/P2RY12/CXCL13/NR1H2/ASAP1/FNIP1/STUB1/RAC1/ATM/BID/GSK3B/PARK7/BCL2L11/BAK1/HCK/PTK2B/PIEZO1/MAPT/CRBN/MED25/GRB2/ATR/SNCA/LCP1	49	BP
GO:0002285	lymphocyte activation involved in immune response	51/1159	207/18903	4.77457e-18	1.04e-16	3.69401e-17	IL12B/IL4R/IL4/TGFB1/TLR4/IL6/IL18/ICAM1/IL6R/NLRP3/CD86/ITGAL/IL12RB1/CD80/F2RL1/SLC11A1/HMGB1/TNFSF4/CCR6/CCL19/RORA/LIG4/MTOR/PLCG2/RORC/JAK3/TFRC/TP53/HSPD1/MALT1/RIPK2/LGALS1/BCL6/PTPRC/ATP7A/ABL1/CR1/IFNA2/NBN/RARA/ERCC1/TP53BP1/CD81/LEF1/EXO1/IFNA6/XBP1/PTK2B/CD74/TNFSF13/LCP1	51	BP
GO:0036473	cell death in response to oxidative stress	35/1159	100/18903	5.10547e-18	1.11e-16	3.93597e-17	TNF/TLR4/NFE2L2/PARP1/MMP3/FYN/SOD2/SOD1/JAK2/CTNNB1/FOXO3/GPX1/HSPB1/HIF1A/CYP1B1/SIRT1/AKT1/MAP3K5/ABL1/PRKCD/VNN1/NOX1/TRPM2/PARK7/HDAC6/RIPK1/LRRK2/SLC7A11/SIGMAR1/PYCR1/NR4A3/TRAP1/PPIA/MCL1/GPR37	35	BP
GO:0007160	cell-matrix adhesion	55/1159	238/18903	5.32245e-18	1.15e-16	4.08869e-17	VCAM1/SMAD3/SERPINE1/ITGB2/ITGAL/CSF1/ITGB3/ITGAM/ITGB1/CCR7/CCN2/RHOA/VEGFA/SRC/CX3CL1/CTNNB1/PTEN/ITGB4/ACVRL1/KDR/CD44/CCL21/CDKN2A/FGG/BCL6/ABL1/CD63/RAC1/PKD1/MMP14/DLC1/TEK/DDR1/CDH13/THBS1/DAG1/BST1/GSK3B/SFRP1/PTK2/PIP5K1A/JAG1/PIK3R1/ITGA2B/BCL2L11/ROCK2/PTK2B/DUSP22/ILK/MADCAM1/ROCK1/ITGA1/TRPM7/HPSE/CIB1	55	BP
GO:0015833	peptide transport	57/1159	254/18903	5.62798e-18	1.21e-16	4.30812e-17	TNF/ALOX5/CCL5/IL6/IL1B/NOS2/IL1RN/SMAD2/TRPV1/CRHR1/ADORA1/CD38/KCNJ11/TAP1/JAK2/ABCC8/ABCC1/CASR/CD209/ANO1/MC4R/ABCA1/HIF1A/NR1D1/FGG/GJA1/AIMP1/ADRA2A/RAF1/AQP1/CNR1/TRPM2/SLC26A6/SFRP1/RBP4/PARK7/GCG/PFKM/MGST1/DRD2/SLC16A1/SSTR5/SLC7A11/CA2/HNF4A/PFKL/OSBP/TCF7L2/GPR68/GABBR1/IRS1/PPARD/GPER1/FFAR4/CD74/CLEC4M/FFAR1	57	BP
GO:0042886	amide transport	62/1159	296/18903	7.27367e-18	1.56e-16	5.54827e-17	TNF/ALOX5/CCL5/IL6/IL1B/NOS2/IL1RN/SMAD2/TRPV1/CRHR1/ABCB1/ADORA1/CD38/KCNJ11/TAP1/JAK2/ABCC8/ABCC1/CASR/CD209/ANO1/MC4R/ABCA1/HIF1A/NR1D1/FGG/GJA1/PSAP/AIMP1/ADRA2A/RAF1/AQP1/CNR1/TRPM2/SLC26A6/SFRP1/RBP4/PARK7/GCG/PFKM/MGST1/ABCG2/DRD2/SLC16A1/SSTR5/SLC7A11/CA2/HNF4A/PFKL/SLC46A1/OSBP/TCF7L2/SLC27A1/GPR68/GABBR1/IRS1/PPARD/GPER1/FFAR4/CD74/CLEC4M/FFAR1	62	BP
GO:0006690	icosanoid metabolic process	39/1159	126/18903	8.67968e-18	1.86e-16	6.59752e-17	ALOX5/GSTM1/GSTP1/IL1B/TLR2/PTGS2/ALOX15/LTA4H/PTGS1/MIF/EPHX1/CYP1A2/CASP1/TNFRSF1A/GGT1/CYP1A1/GSTA1/ABCC1/AKR1C3/GPX1/PTGES/GPX4/CYP1B1/SIRT1/CYP2C9/AKR1B1/CYP2C8/TBXAS1/FADS1/CYP4F2/CBR1/ATP6V1B1/CES2/MGLL/HPGD/MAPKAPK2/CD74/DPEP1/AKR1C1	39	BP
GO:0007596	blood coagulation	53/1159	225/18903	8.83337e-18	1.89e-16	6.69087e-17	TLR4/IL6/NOS3/SERPINE1/NFE2L2/F2RL1/ITGB3/LYN/PRKCA/MAPK14/F2R/LCK/SRC/PRKG1/JAK2/SHH/THBD/PLCG2/CAV1/HSPB1/PRKCQ/P2RY12/ANXA2/F3/F10/FGG/F2/ADRA2A/PRKCD/FLNA/THBS1/ACTB/P2RX1/ENTPD1/PDGFA/P2RY1/LMAN1/PTPN6/CYP4F2/PRDX2/PABPC4/PIK3CA/SLC7A11/HNF4A/ITPK1/ENTPD2/PDPN/ILK/PPIA/F12/HPSE/CSRP1/ADRA2C	53	BP
GO:0010631	epithelial cell migration	70/1159	366/18903	9.33212e-18	1.98e-16	7.04401e-17	TNF/IL4/TGFB1/PTGS2/NOS3/HMOX1/NFE2L2/JUN/PPARG/ITGB3/HMGB1/TACR1/ANGPT1/DPP4/PRKCA/ITGB1/RHOA/LTB4R2/VEGFA/SRC/TGFBR1/FGFR1/MTOR/ADAM17/PLCG2/PTEN/APOA1/GPX1/ACVRL1/NOTCH1/HSPB1/HIF1A/KDR/CYP1B1/SIRT1/AKT1/HYAL1/PDPK1/CXCL13/DOCK1/AGT/DUSP10/KIT/PIK3C2A/ABL1/CSNK2B/RAC1/TEK/NR4A1/CDH13/HBEGF/THBS1/PTK2/BMPER/HDAC6/FOXC2/PIK3CA/ADIPOR1/EPHA2/ROCK2/SERPINF1/FGF4/PTK2B/LGALS8/SCARB1/ROCK1/FGF1/PPAR…	70	BP
GO:0031331	positive regulation of cellular catabolic process	77/1159	429/18903	9.4263e-18	2e-16	7.0904e-17	ADRB2/TNF/IL4/IL6/IL33/IL1B/NOD2/TLR9/NOD1/HMOX1/NFE2L2/HMGB1/MAPK3/MTOR/FOXO3/PTEN/CAV1/APOA1/BAX/ABHD5/HIF1A/KDR/CLU/HSPA1A/PRKAA2/SIRT1/RIPK2/AKT1/CEBPA/BECN1/YTHDF1/GBA1/PIK3C2A/MDM2/ADRA2A/IKBKG/PRKCD/MAP3K7/VDAC1/STUB1/DVL1/ATM/PPARA/AGTPBP1/GSK3B/PLK1/BAG3/FABP1/PTK2/ITCH/INSR/IRGM/PARK7/SPTLC1/ARNT/KAT5/BCL2L11/FZR1/PABPC1/AXIN1/YBX1/LRRK2/RNF31/ROCK2/AURKA/TBK1/PTK2B/PCSK9/PRKAA1/PNPLA2/…	77	BP
GO:0051897	positive regulation of protein kinase B signaling	38/1159	120/18903	9.59494e-18	2.03e-16	7.19227e-17	TNF/TGFB1/IL18/CX3CR1/EGFR/ANGPT1/ITGB1/CCR7/HSP90AA1/SRC/CCL19/TGFBR1/CX3CL1/FGFR1/AKR1C3/GPX1/NRG1/CCL21/P2RY12/F3/F10/HAX1/NOX4/MC1R/IGF1R/PHB1/TEK/HBEGF/THBS1/PTK2/INSR/PDGFA/PARK7/PIK3CA/TCF7L2/LIN28A/TPBG/HPSE	38	BP
GO:0050671	positive regulation of lymphocyte proliferation	42/1159	146/18903	9.69589e-18	2.04e-16	7.24288e-17	IL12B/IL4/CCL5/TLR4/IL6/IL1B/IL18/VCAM1/TLR9/IL1A/CD86/MIF/IL12RB1/CD80/HMGB1/TNFSF4/CCR2/TACR1/BTK/TNFRSF4/TNFSF13B/CD38/CCL19/JAK2/SHH/JAK3/TRAF6/TFRC/CD209/ICOSLG/PRKCQ/RIPK2/CD274/BCL6/PTPRC/PDCD1LG2/CDKN1A/BST1/CD81/HES1/BMI1/CD74	42	BP
GO:0006066	alcohol metabolic process	70/1159	367/18903	1.08671e-17	2.28e-16	8.08988e-17	IL4/NFKB1/ALDH2/PON1/CYP3A4/CYP1A2/HSD11B2/SOD1/BMP6/CYP27B1/PLCG2/CYP1A1/G6PD/AKR1C3/PTEN/ADH5/APOA1/BMP2/EBP/ABCA1/PRKAA2/EDNRB/SULT1A1/ADCYAP1R1/CYP1B1/EPHX2/CYP2C9/CEBPA/AKR1B1/GBA1/SOAT1/PLCB1/CYP2C8/ADH1C/HMGCR/RBP4/SLC34A1/ALDH1A2/PARK7/P2RY1/SPTLC1/SCNN1B/SULT2B1/HAO1/ADH1B/NUDT3/CACNA1H/SPHK2/DGAT1/DHCR24/DPAGT1/NPC1/CES1/PTK2B/PCSK9/SCARB1/PRKAA1/PNPLA2/INPP4B/ITPK1/SPHK1/TTR/FGF1/PPARD…	70	BP
GO:0046883	regulation of hormone secretion	54/1159	234/18903	1.14496e-17	2.39e-16	8.49436e-17	TNF/ALOX5/CCL5/IL6/IL1B/NOS2/PPARG/CRHR1/TACR1/CREB1/ADORA1/CD38/KCNJ11/BMP6/JAK2/SPP1/ABCC8/CASR/ANO1/HIF1A/NR1D1/AGTR1/FGG/GJA1/AIMP1/CRY1/CRY2/AGT/ADRA2A/REN/OPRK1/CNR1/TRPM2/SFRP1/RBP4/P2RY1/GCG/PFKM/DRD2/SLC16A1/GALR1/SSTR5/HNF4A/PFKL/OSBP/TCF7L2/CCKAR/GPR68/GABBR1/IRS1/PPARD/GPER1/FFAR4/FFAR1	54	BP
GO:0060047	heart contraction	56/1159	250/18903	1.20723e-17	2.51e-16	8.92574e-17	TNF/NOS3/NOS1/EDNRA/PDE4D/TRPV1/ADORA1/CXCR4/CCN2/ACE2/ADORA3/HSP90AA1/PDE4B/ATP2A2/SOD1/NPPA/JAK2/CALCA/MTOR/CAV1/GPX1/GSTO1/ADRB1/EDNRB/CACNA1C/GJA1/ATP2A3/AGT/GLP1R/ZMPSTE24/MDM2/FLNA/KCNQ1/HBEGF/THRB/SLC8A1/THRA/MYH7/ATP1A1/CACNA2D1/PDE5A/DRD2/ATP2A1/TPM1/PIK3CA/CACNA1H/ADRA1A/PRKACA/CDC42/EPAS1/GRK2/SCN1A/KCNJ5/DNM1L/CALM1/KCNE1	56	BP
GO:0048017	inositol lipid-mediated signaling	47/1159	182/18903	1.30304e-17	2.71e-16	9.60135e-17	TNF/CCL5/IL18/F2RL1/EGFR/ANGPT1/FLT1/F2R/SRC/JAK2/FGFR1/PTEN/ERBB2/ERBB4/KDR/SIRT1/AKT1/PLCB3/F2/BECN1/HAX1/CSF1R/AGT/KIT/PIK3C2A/PLCB1/IGF1R/TEK/NCF1/NTRK1/PIP5K1B/PTK2/INSR/PDGFA/PTPN6/LTK/PIP5K1A/PDGFRB/PIK3R1/RASGRP1/PLD1/PIK3CA/RPS6KB1/GPR143/IRS1/PPARD/GPER1	47	BP
GO:0090132	epithelium migration	70/1159	369/18903	1.47077e-17	3.04e-16	1.08005e-16	TNF/IL4/TGFB1/PTGS2/NOS3/HMOX1/NFE2L2/JUN/PPARG/ITGB3/HMGB1/TACR1/ANGPT1/DPP4/PRKCA/ITGB1/RHOA/LTB4R2/VEGFA/SRC/TGFBR1/FGFR1/MTOR/ADAM17/PLCG2/PTEN/APOA1/GPX1/ACVRL1/NOTCH1/HSPB1/HIF1A/KDR/CYP1B1/SIRT1/AKT1/HYAL1/PDPK1/CXCL13/DOCK1/AGT/DUSP10/KIT/PIK3C2A/ABL1/CSNK2B/RAC1/TEK/NR4A1/CDH13/HBEGF/THBS1/PTK2/BMPER/HDAC6/FOXC2/PIK3CA/ADIPOR1/EPHA2/ROCK2/SERPINF1/FGF4/PTK2B/LGALS8/SCARB1/ROCK1/FGF1/PPAR…	70	BP
GO:0046683	response to organophosphorus	39/1159	128/18903	1.59888e-17	3.3e-16	1.17016e-16	IL1B/PTGS2/TRPV1/STAT1/AHR/FOS/SOD1/KCNJ11/ENPP1/THBD/COL1A1/RAPGEF3/CYP1B1/P2RY12/P2RY2/ITPR2/KCNQ1/NT5E/AQP1/REN/DUOX1/HSP90B1/P2RX1/SLC26A6/FOSB/SLC8A1/SDC1/P2RY1/APEX1/HSPA5/PKLR/BIRC2/P2RX6/PTK2B/FBP1/SRD5A1/KCNE1/RAP1A/AKR1C1	39	BP
GO:0009755	hormone-mediated signaling pathway	48/1159	192/18903	2.44042e-17	5.01e-16	1.77764e-16	NR3C1/PPARG/CRHR1/PARP1/RHOA/HDAC1/AR/SRC/JAK2/ESR1/EP300/NR3C2/NR1D1/NCOA1/SIRT1/CRY1/CRY2/PHB1/CSNK2B/PPARA/SKP2/SMARCA4/REN/RXRB/SFRP1/THRB/PARK7/RARA/THRA/HDAC6/KDM4C/ESR2/BRCA1/DNAJA1/SSTR5/RARB/ADIPOR1/NR4A3/EGLN2/SLC27A1/YAP1/NR1H3/PPARD/GPER1/RXFP1/NR2C1/PGR/ESRRA	48	BP
GO:0032102	negative regulation of response to external stimulus	77/1159	436/18903	2.45194e-17	5.01e-16	1.77764e-16	TNF/ALOX5/IL12B/IL4/IRAK3/GSTP1/CCL2/NOD2/SMAD3/NOS3/SERPINE1/NLRP3/ARG1/MIF/PPARG/LYN/NFKB1/LTF/DPP4/ADORA1/MAPK14/DUSP1/PARP1/FYN/SRC/SOD1/PRKG1/TNFRSF1A/RORA/CX3CL1/THBD/SPP1/ABCC8/PTEN/APOA1/GPX1/NOTCH1/FPR2/NR1D1/ANXA2/FGG/F2/CXCL13/PTPRC/GBA1/DUSP10/NR1H2/CR1/PRKCD/DVL1/CNR2/PPARA/NT5E/TEK/USP15/THBS1/SLC12A2/ITCH/SAMHD1/PDGFA/PRDX2/DRD2/PSMA1/HCK/ST6GAL1/DRD1/SERPINF1/KLRK1/DRD3/SHARPIN/OA…	77	BP
GO:0002224	toll-like receptor signaling pathway	38/1159	123/18903	2.45795e-17	5.01e-16	1.77764e-16	TNF/IRAK3/CD14/TLR4/TLR2/NOD2/TLR9/IRF1/TLR1/TLR3/F2RL1/HMGB1/NFKBIA/LYN/LTF/TLR5/BTK/IRAK1/ESR1/PLCG2/TRAF6/CAV1/NR1D1/HSPD1/RPS6KA3/BIRC3/CTSS/IRAK4/RIPK2/PDPK1/LY96/MAP3K7/BIRC2/FLOT1/OAS1/MAPKAPK2/IRAK2/NR1H3	38	BP
GO:0050817	coagulation	53/1159	230/18903	2.46175e-17	5.01e-16	1.77764e-16	TLR4/IL6/NOS3/SERPINE1/NFE2L2/F2RL1/ITGB3/LYN/PRKCA/MAPK14/F2R/LCK/SRC/PRKG1/JAK2/SHH/THBD/PLCG2/CAV1/HSPB1/PRKCQ/P2RY12/ANXA2/F3/F10/FGG/F2/ADRA2A/PRKCD/FLNA/THBS1/ACTB/P2RX1/ENTPD1/PDGFA/P2RY1/LMAN1/PTPN6/CYP4F2/PRDX2/PABPC4/PIK3CA/SLC7A11/HNF4A/ITPK1/ENTPD2/PDPN/ILK/PPIA/F12/HPSE/CSRP1/ADRA2C	53	BP
GO:0010212	response to ionizing radiation	41/1159	143/18903	2.71713e-17	5.5e-16	1.95274e-16	VCAM1/IL1A/CXCL10/MAPK14/PARP1/CASP3/SOD2/LIG4/THBD/CCND1/TP53/GPX1/BAX/SIRT1/MYC/PTPRC/ZMPSTE24/MDM2/EGR1/PRKDC/ATM/TOPBP1/CDKN1A/MEN1/SFRP1/EEF1D/ERCC1/BCL2L1/TP53BP1/KAT5/BRCA1/HSPA5/BAK1/RAD51/PRKAA1/ELK1/GRB2/YAP1/CHEK2/ATR/HRAS	41	BP
GO:0043406	positive regulation of MAP kinase activity	37/1159	117/18903	2.72225e-17	5.5e-16	1.95274e-16	TNF/TGFB1/TLR4/IL1B/NOD2/TLR9/MIF/EGFR/FLT1/VEGFA/IRAK1/SRC/CCL19/FGFR1/TRAF6/ERBB2/TGFA/MAP3K5/DKK1/PTPRC/KIT/NOX4/ADRA2A/MAP3K7/THBS1/INSR/PDGFA/PDGFRB/RASGRP1/PDE5A/AXIN1/LRRK2/DVL2/PTK2B/FGF1/PTPN1/HRAS	37	BP
GO:0048015	phosphatidylinositol-mediated signaling	46/1159	178/18903	2.80606e-17	5.65e-16	2.00621e-16	TNF/CCL5/IL18/F2RL1/EGFR/ANGPT1/FLT1/F2R/SRC/JAK2/FGFR1/PTEN/ERBB2/ERBB4/KDR/SIRT1/AKT1/PLCB3/F2/BECN1/HAX1/CSF1R/AGT/KIT/PIK3C2A/PLCB1/IGF1R/TEK/NCF1/NTRK1/PIP5K1B/PTK2/INSR/PDGFA/PTPN6/LTK/PIP5K1A/PDGFRB/PIK3R1/RASGRP1/PIK3CA/RPS6KB1/GPR143/IRS1/PPARD/GPER1	46	BP
GO:0070301	cellular response to hydrogen peroxide	33/1159	93/18903	2.82929e-17	5.68e-16	2.01616e-16	IL6/TRPA1/ARG1/NFE2L2/NQO1/HDAC2/FYN/SRC/FOXO3/CYP1B1/SIRT1/MAP3K5/BECN1/RELA/ABL1/PRKCD/AQP1/TRPM2/FABP1/PARK7/APEX1/HDAC6/RIPK1/LRRK2/SIGMAR1/PYCR1/NR4A3/PRKAA1/TRAP1/SPHK1/MAP1LC3A/CDK1/GPR37	33	BP
GO:0032755	positive regulation of interleukin-6 production	34/1159	99/18903	2.99805e-17	6e-16	2.12942e-16	TNF/TLR4/IL6/IL33/IL1B/TLR2/NOS2/NOD2/IL6R/TLR9/IL1A/IL17F/NOD1/TLR1/TLR3/F2RL1/HMGB1/TNFSF4/BTK/MMP8/F2R/CLEC7A/PLCG2/MAVS/TRAF6/IFIH1/IL1RAP/HSPD1/RIPK2/IL1RL2/SPHK2/XBP1/EREG/CD74	34	BP
GO:0090130	tissue migration	70/1159	374/18903	3.09975e-17	6.18e-16	2.19446e-16	TNF/IL4/TGFB1/PTGS2/NOS3/HMOX1/NFE2L2/JUN/PPARG/ITGB3/HMGB1/TACR1/ANGPT1/DPP4/PRKCA/ITGB1/RHOA/LTB4R2/VEGFA/SRC/TGFBR1/FGFR1/MTOR/ADAM17/PLCG2/PTEN/APOA1/GPX1/ACVRL1/NOTCH1/HSPB1/HIF1A/KDR/CYP1B1/SIRT1/AKT1/HYAL1/PDPK1/CXCL13/DOCK1/AGT/DUSP10/KIT/PIK3C2A/ABL1/CSNK2B/RAC1/TEK/NR4A1/CDH13/HBEGF/THBS1/PTK2/BMPER/HDAC6/FOXC2/PIK3CA/ADIPOR1/EPHA2/ROCK2/SERPINF1/FGF4/PTK2B/LGALS8/SCARB1/ROCK1/FGF1/PPAR…	70	BP
GO:1904019	epithelial cell apoptotic process	40/1159	137/18903	3.28687e-17	6.54e-16	2.31935e-16	TNF/IL4/IL6/ICAM1/CCL2/SERPINE1/HMOX1/EDNRA/NFE2L2/ANGPT1/CASP3/JAK2/ESR1/FOXO3/AKR1C3/BAX/KDR/FGG/PDPK1/MAP3K5/ABL1/IGF1R/CFLAR/PPARA/TEK/THBS1/BID/CASP9/BCL2L1/LEF1/STK4/E2F1/FGF4/EXOC5/PRKAA1/TCF7L2/CD248/YAP1/GPER1/PLCG1	40	BP
GO:0045580	regulation of T cell differentiation	46/1159	179/18903	3.55788e-17	7.03e-16	2.49433e-16	IL12B/IL4R/IL4/IL18/IRF1/NLRP3/CD86/IL12RB1/CD80/HMGB1/TNFSF4/CCR2/RHOA/CCL19/SOD1/SHH/FOXO3/JAK3/RUNX1/ERBB2/VSIR/MALT1/RIPK2/BCL6/PTPRC/DUSP10/ABL1/CR1/IFNA2/VNN1/SMARCA4/IL1RL2/ACTB/SMARCD2/BRD7/PRDM1/RARA/SOS1/PRDX2/RASGRP1/LEF1/KAT5/XBP1/TCF7/ZEB1/CD74	46	BP
GO:0060759	regulation of response to cytokine stimulus	46/1159	179/18903	3.55788e-17	7.03e-16	2.49433e-16	IRAK3/CCL5/TLR4/IL6/GSTP1/TLR2/IL1RN/IL1R1/ARG1/CSF1/PPARG/F2RL1/CASP8/ANGPT1/CXCR4/IRAK1/CASP1/TNFRSF1A/ADAM17/MAVS/IKBKB/IFIH1/CAV1/APOA1/HIF1A/HSPA1A/XIAP/RIPK2/IL36RN/PTPRC/NR1H2/CASP4/SAMHD1/IRGM/AGPAT1/PTPN6/RIPK1/TBK1/IKBKE/SHARPIN/SPHK1/OAS1/IRAK2/PTPN1/NR1H3/CD74	46	BP
GO:2001242	regulation of intrinsic apoptotic signaling pathway	45/1159	172/18903	3.73337e-17	7.33e-16	2.6024e-16	PTGS2/MIF/NFE2L2/CXCL12/PARP1/LCK/HDAC1/SRC/SOD2/SOD1/MUC1/TP53/CAV1/GPX1/DDIT3/BAX/HSPB1/HIF1A/ENO1/CLU/HSPA1A/CD44/SIRT1/MYC/AKT1/BECN1/MDM2/VNN1/NOX1/HYOU1/BID/PARK7/BCL2L1/BCL2L11/DNAJA1/LRRK2/XBP1/OPA1/TRAP1/PPIA/PTPN1/DNM1L/MCL1/CD74/ACKR3	45	BP
GO:0071346	cellular response to interferon-gamma	37/1159	118/18903	3.73605e-17	7.33e-16	2.6024e-16	TNF/IL12B/CCL5/TLR4/TLR2/NOS2/CCL2/CCL17/JAK1/CCL24/CCL26/IRF1/CCL22/ARG1/IL12RB1/PPARG/TLR3/IFNGR2/STAT1/CCL19/CASP1/CX3CL1/JAK2/CCL20/TP53/CCL21/MRC1/CCL15/NR1H2/SLC26A6/IRGM/FLNB/HCK/RPS6KB1/CDC42/KIF5B/NR1H3	37	BP
GO:0045088	regulation of innate immune response	54/1159	240/18903	3.76487e-17	7.37e-16	2.61407e-16	IL12B/IRAK3/CCL5/TLR4/NOD2/TLR9/MBL2/IRF1/ARG1/NFE2L2/PPARG/CREBBP/HMGB1/LYN/CASP8/PARP1/HSP90AA1/FYN/CLEC7A/SRC/CFH/PLCG2/MAVS/IKBKB/TRAF6/EP300/FPR2/BIRC3/XIAP/DUSP10/NR1H2/CR1/MAP3K7/PRKDC/USP15/NCF1/SAMHD1/IRGM/PTPN6/RASGRP1/DRD2/HCK/BIRC2/TBK1/CGAS/KLRK1/IKBKE/HEXIM1/EREG/OAS1/PTPN1/NR1H3/ERAP1/PAK3	54	BP
GO:0044703	multi-organism reproductive process	50/1159	209/18903	3.80157e-17	7.41e-16	2.63112e-16	IL1B/PTGS2/ARG1/ITGB3/CRHR1/TACR1/MMP2/IDO1/PARP1/ACE2/VDR/VEGFA/CD38/AR/FOS/HSD11B2/SOD1/NPPA/CALCA/ESR1/THBD/CYP27B1/CYP1A1/SPP1/ABCC8/ITGB4/PTHLH/AKT1/CBS/GJA1/AGT/ATP7A/ADRA2A/SLC2A1/DDR1/CNR1/CTSB/MEN1/P2RX1/FOSB/PRDM1/RARA/SMURF2/CAPN2/SPHK2/HPGD/PPARD/RXFP1/PGR/PGF	50	BP
GO:0010952	positive regulation of peptidase activity	48/1159	194/18903	3.8309e-17	7.45e-16	2.64297e-16	TNF/SMAD3/NOD1/NLRP3/PPARG/HMGB1/LYN/CASP8/XDH/CCN2/RHOA/F2R/LCK/FYN/CLEC7A/CASP1/FAS/JAK2/CAV1/BAX/HSPD1/VSIR/SIRT1/MALT1/MYC/RIPK2/F3/NLRP1/MAP3K5/ATP2A3/CR1/CFLAR/DLC1/BID/P2RX1/CASP9/SENP1/BCL2L11/PSMD14/ADRM1/HSPE1/BAK1/ROCK2/GRIN2A/MAPT/PICALM/GPER1/SNCA	48	BP
GO:0044409	entry into host	43/1159	158/18903	3.85226e-17	7.46e-16	2.64928e-16	CXCL8/ICAM1/CCR5/CD86/CD80/ITGB3/HMGB1/EGFR/DPP4/CXCR4/ITGB1/TNFRSF4/ACE2/SELPLG/SRC/TFRC/CAV1/CD209/HSPA1A/AGTR1/LGALS1/MRC1/ANPEP/CR1/PHB1/SLC1A5/IFNA2/CTSB/DAG1/ITCH/INSR/RPSA/CD81/JPT2/EPHA2/NPC1/GRK2/PIKFYVE/SCARB1/IFITM1/CDK1/CD74/CLEC4M	43	BP
GO:0022408	negative regulation of cell-cell adhesion	49/1159	202/18903	4.29457e-17	8.3e-16	2.94411e-16	IL4R/IL4/TGFB1/IL1RN/IRF1/CD86/ARG1/CD80/HMGB1/TNFSF4/CXCL12/CDH1/IDO1/VEGFA/CASP3/CEBPB/PRKG1/BMP6/JAK2/SHH/JAK3/PTEN/RUNX1/APOA1/ERBB2/NOTCH1/BMP2/CCL21/VSIR/AKT1/FGG/CD274/BCL6/EPCAM/ABL1/CR1/PRKCD/PDCD1LG2/PPARA/IFNA2/PTK2/ITCH/PTPN6/JAG1/PRDX2/WNK1/PDE5A/DUSP22/CD74	49	BP
GO:0006898	receptor-mediated endocytosis	56/1159	257/18903	4.54957e-17	8.76e-16	3.10909e-16	ADRB2/IL4/CXCL8/CD14/SERPINE1/ITGB2/C3/ITGB3/ITGAM/SELE/CXCR1/CXCR2/ANGPT1/DPP4/ITGB1/ACE2/VEGFA/CCL19/PLCG2/TFRC/CAV1/TF/LRP1/CLU/CCL21/ANXA2/MRC1/ARRB1/DKK1/RAMP1/CD63/RAC1/ACHE/INSR/SDC1/CD81/DRD2/CLTC/PPT1/ARF1/FLOT1/GRK2/DNM1/PCSK9/PIKFYVE/TNK2/PICALM/DRD3/AP2A1/MSR1/GRB2/GRIA1/SNCA/ACKR3/CLEC4M/AAK1	56	BP
GO:0014065	phosphatidylinositol 3-kinase signaling	41/1159	145/18903	4.70046e-17	8.99e-16	3.19227e-16	TNF/CCL5/IL18/F2RL1/EGFR/ANGPT1/FLT1/F2R/SRC/JAK2/FGFR1/PTEN/ERBB2/ERBB4/KDR/SIRT1/AKT1/F2/BECN1/HAX1/AGT/KIT/PIK3C2A/IGF1R/TEK/NCF1/NTRK1/PIP5K1B/PTK2/INSR/PDGFA/PTPN6/LTK/PIP5K1A/PDGFRB/PIK3R1/RASGRP1/PIK3CA/IRS1/PPARD/GPER1	41	BP
GO:0007623	circadian rhythm	50/1159	210/18903	4.70076e-17	8.99e-16	3.19227e-16	TNF/CSF2/NOS2/PPARG/HDAC2/CREB1/ADORA1/AHR/PARP1/HDAC1/RORA/MTOR/RORC/PTEN/TP53/EP300/MAPK8/NR1D1/PRKAA2/ADRB1/SIRT1/CRY1/CRY2/EGR1/PRKDC/PPARA/HDAC3/ATG7/NAMPT/MAPK10/NTRK1/PPARGC1A/GSK3B/KMT2A/KAT5/PHLPP1/DRD2/HUWE1/TPH1/HNF4A/ROCK2/ADCY1/PRKAA1/DRD3/SUV39H1/NR1H3/RORB/SRD5A1/CDK1/KLF10	50	BP
GO:0044706	multi-multicellular organism process	51/1159	218/18903	5.03568e-17	9.61e-16	3.40902e-16	IL1B/PTGS2/ARG1/ITGB3/CRHR1/TACR1/MMP2/IDO1/PARP1/ACE2/VDR/VEGFA/CD38/AR/FOS/HSD11B2/SOD1/NPPA/CALCA/ESR1/THBD/CYP27B1/CYP1A1/SPP1/ABCC8/ITGB4/PTHLH/AKT1/CBS/GJA1/AGT/ATP7A/ADRA2A/SLC2A1/DDR1/HEXB/CNR1/CTSB/MEN1/P2RX1/FOSB/PRDM1/RARA/SMURF2/CAPN2/SPHK2/HPGD/PPARD/RXFP1/PGR/PGF	51	BP
GO:0032609	interferon-gamma production	37/1159	119/18903	5.1078e-17	9.68e-16	3.43637e-16	TNF/IL12B/CD14/TLR4/IL33/IL1B/IL18/LTA/NOD2/TLR9/IL1R1/IL12RB1/PDE4D/TLR3/F2RL1/SLC11A1/HMGB1/TNFSF4/CCR2/CCR7/CLEC7A/PDE4B/JAK2/DDIT3/HSPD1/VSIR/RIPK2/CD274/IL36RN/ABL1/CR1/PDCD1LG2/RARA/RASGRP1/KLRK1/SLC7A5/HRAS	37	BP
GO:0032649	regulation of interferon-gamma production	37/1159	119/18903	5.1078e-17	9.68e-16	3.43637e-16	TNF/IL12B/CD14/TLR4/IL33/IL1B/IL18/LTA/NOD2/TLR9/IL1R1/IL12RB1/PDE4D/TLR3/F2RL1/SLC11A1/HMGB1/TNFSF4/CCR2/CCR7/CLEC7A/PDE4B/JAK2/DDIT3/HSPD1/VSIR/RIPK2/CD274/IL36RN/ABL1/CR1/PDCD1LG2/RARA/RASGRP1/KLRK1/SLC7A5/HRAS	37	BP
GO:0120254	olefinic compound metabolic process	43/1159	160/18903	6.40859e-17	1.21e-15	4.29815e-16	ALOX5/GSTP1/PTGS2/ALOX15/PTGS1/EPHX1/CYP3A4/CYP1A2/HSD11B2/BMP6/CYP1A1/GSTA1/AKR1C3/GPX1/BMP2/GPX4/EDNRB/CYP1B1/EPHX2/CYP2C9/AKR1B1/EGR1/CYP2C8/ADH1C/TBXAS1/RBP4/ALDH1A2/SCNN1B/FADS1/CYP4F2/ELOVL1/ADH1B/CYP17A1/CBR1/CACNA1H/DGAT1/PNPLA2/MGLL/HSD17B1/AFP/TTR/SRD5A1/AKR1C1	43	BP
GO:0001822	kidney development	62/1159	309/18903	6.58749e-17	1.24e-15	4.4045e-16	SMAD3/IL6R/SMAD2/EDNRA/ITGB3/STAT1/CXCR2/ANGPT1/MME/RHOA/VEGFA/TGFBR1/BMP6/PTCH1/SHH/CTNNB1/NOTCH1/ERBB4/BMP2/BAX/EDNRB/AGTR1/MYC/AKR1B1/AGT/EPCAM/SIX1/ZMPSTE24/CFLAR/EGR1/CYP26A1/PKD1/TEK/AQP1/ADAMTS1/REN/SFRP1/SLC34A1/ALDH1A2/BMPER/SDC1/PDGFA/CASP9/PRDM1/RARA/PDGFRB/JAG1/TRAF3IP2/HES1/BCL2L11/PTCD2/FOXC2/AP1B1/LRRK2/RARB/SERPINF1/PCSK9/LIN28A/ILK/HPGD/FGF1/YAP1	62	BP
GO:0072001	renal system development	63/1159	318/18903	7.06935e-17	1.33e-15	4.71214e-16	SMAD3/IL6R/SMAD2/EDNRA/ITGB3/STAT1/CXCR2/ANGPT1/MME/RHOA/VEGFA/TGFBR1/BMP6/PTCH1/SHH/CTNNB1/NOTCH1/ERBB4/BMP2/BAX/EDNRB/AGTR1/MYC/AKR1B1/AGT/EPCAM/SIX1/ZMPSTE24/CFLAR/EGR1/CYP26A1/PKD1/TEK/AQP1/ADAMTS1/REN/SFRP1/RBP4/SLC34A1/ALDH1A2/BMPER/SDC1/PDGFA/CASP9/PRDM1/RARA/PDGFRB/JAG1/TRAF3IP2/HES1/BCL2L11/PTCD2/FOXC2/AP1B1/LRRK2/RARB/SERPINF1/PCSK9/LIN28A/ILK/HPGD/FGF1/YAP1	63	BP
GO:0002822	regulation of adaptive immune response based on somatic recombination of immune receptors built from immunoglobulin superfamily domains	46/1159	182/18903	7.16991e-17	1.34e-15	4.7645e-16	TNF/IL12B/IL4R/IL4/TGFB1/IL6/IL33/IL1B/IL18/LTA/NOD2/IL1R1/NLRP3/ARG1/C3/IL12RB1/CD80/SLC11A1/HMGB1/TNFSF4/CCR2/BTK/AHR/TNFSF13B/CLEC7A/CCL19/JAK2/JAK3/TRAF6/TFRC/HSPD1/PRKCQ/MALT1/RIPK2/CD274/BCL6/PTPRC/CR1/MAP3K7/IFNA2/PTPN6/TP53BP1/CD81/DUSP22/HLA-DRB3/TNFSF13	46	BP
GO:0002526	acute inflammatory response	36/1159	114/18903	7.72053e-17	1.44e-15	5.11471e-16	TNF/IL4/IL6/GSTP1/IL1B/VCAM1/PTGS2/IL6R/MBL2/IL1A/NLRP3/C3/TRPV1/TNFSF4/TACR1/CXCR2/ADORA1/BTK/CCR7/SERPINA3/OPRM1/CEBPB/TFRC/TREM1/PTGES/EDNRB/F3/F2/ACVR1/ADRA2A/VNN1/CNR1/DNASE1/PARK7/UGT1A1/F12	36	BP
GO:0010876	lipid localization	81/1159	483/18903	8.21252e-17	1.53e-15	5.42406e-16	TNF/IL6/IL1B/NOS2/PTGS2/IL1A/MIF/C3/PPARG/ITGB3/CRHR1/NFKBIA/NFKB1/ABCB1/PON1/PLA2G2A/BMP6/PTCH1/ENPP1/SHH/SPP1/ABCC1/CAV1/APOA1/ABHD5/ABCA1/PTGES/LRP1/CLU/ANXA2/SIRT1/AGTR1/AKT1/PSAP/NMUR2/CRY1/CRY2/AGT/GBA1/SOAT1/NR1H2/PRKCD/ESYT1/KCNQ1/SLC2A1/PPARA/SLCO1B1/REN/HEXB/FABP4/THBS1/RBP4/FABP1/EHD1/CYP4F2/ABCG2/VPS4B/DRD2/GALR1/RPS6KB1/DGAT1/NPC1/CES1/SIGMAR1/ATP8B1/OSBP/PCSK9/SCARB1/PRKAA1/IKBKE/PN…	81	BP
GO:0003073	regulation of systemic arterial blood pressure	33/1159	96/18903	8.51227e-17	1.58e-15	5.60494e-16	ADRB2/TNF/NOS3/PDE4D/F2RL1/TRPV1/TACR1/ADORA1/ACE2/RHOA/F2R/AR/HSD11B2/SOD2/NPPA/CALCA/ADRB1/EDNRB/AGTR1/PLCB3/AGT/ECE1/REN/NOX1/CYP4F2/WNK1/KLK1/DRD2/TPM1/ADRA1A/AVPR2/SUCNR1/DDAH1	33	BP
GO:0002720	positive regulation of cytokine production involved in immune response	30/1159	79/18903	8.86201e-17	1.64e-15	5.81755e-16	IL4/TLR4/IL6/IL1B/IL18/NOD2/NOD1/IL1R1/NLRP3/MIF/TLR3/F2RL1/TNFSF4/CLEC7A/PLCG2/MAVS/TRAF6/SIRT1/MALT1/RIPK2/DDX1/KIT/MAP3K7/CD81/SPHK2/HK1/NR4A3/SLC7A5/MAPKAPK2/CD74	30	BP
GO:0032635	interleukin-6 production	45/1159	176/18903	9.696e-17	1.78e-15	6.32669e-16	TNF/IRAK3/TLR4/IL6/IL33/IL1B/TLR2/NOS2/NOD2/IL6R/TLR9/IL1A/IL17F/NOD1/TLR1/TLR3/F2RL1/HMGB1/TNFSF4/BTK/MMP8/F2R/CLEC7A/CEBPB/CX3CL1/PLCG2/MAVS/TRAF6/IFIH1/IL37/IL1RAP/HSPD1/RIPK2/ARRB1/IL36RN/GBA1/IL1RL2/PTPN6/CAPN2/SPHK2/XBP1/INPP5D/EREG/MAPKAPK2/CD74	45	BP
GO:0032675	regulation of interleukin-6 production	45/1159	176/18903	9.696e-17	1.78e-15	6.32669e-16	TNF/IRAK3/TLR4/IL6/IL33/IL1B/TLR2/NOS2/NOD2/IL6R/TLR9/IL1A/IL17F/NOD1/TLR1/TLR3/F2RL1/HMGB1/TNFSF4/BTK/MMP8/F2R/CLEC7A/CEBPB/CX3CL1/PLCG2/MAVS/TRAF6/IFIH1/IL37/IL1RAP/HSPD1/RIPK2/ARRB1/IL36RN/GBA1/IL1RL2/PTPN6/CAPN2/SPHK2/XBP1/INPP5D/EREG/MAPKAPK2/CD74	45	BP
GO:1903532	positive regulation of secretion by cell	58/1159	278/18903	1.0391e-16	1.9e-15	6.75983e-16	IL4R/IL4/TGFB1/TLR4/IL1B/TLR2/IL1A/ITGB2/MIF/PPARG/F2RL1/ITGAM/TACR1/CREB1/CXCL12/CD38/BMP6/JAK2/SPP1/CASR/BMP2/ANO1/PTGES/HIF1A/ANXA2/FGG/AIMP1/AGT/NR1H2/ANG/OPRK1/CNR1/TRPM2/SLC12A2/ACHE/RBP4/SDC1/P2RY1/GCG/PCSK1/PFKM/VPS4B/DRD2/GALR1/CACNA1H/SPHK2/OSBP/GRK2/TCF7L2/PPIA/GPR68/DNM1L/GABBR1/PPARD/GPER1/FFAR4/SNCA/FFAR1	58	BP
GO:0001935	endothelial cell proliferation	48/1159	199/18903	1.14877e-16	2.1e-15	7.45086e-16	TNF/ALOX5/IL12B/CCL2/CCL24/CCL26/HMOX1/ARG1/JUN/PPARG/ITGB3/STAT1/HMGB1/CXCL12/PRKCA/XDH/FLT1/VEGFA/TGFBR1/BMP6/FGFR1/ADAM17/CAV1/FUT2/APOA1/ACVRL1/BMP2/HIF1A/KDR/SIRT1/AGTR1/F3/AKT1/PDPK1/AIMP1/MMP14/TEK/NR4A1/ANG/CDH13/THBS1/ALDH1A2/BMPER/ARNT/EPHA2/SCARB1/PLCG1/PGF	48	BP
GO:0062012	regulation of small molecule metabolic process	65/1159	339/18903	1.24703e-16	2.27e-15	8.06404e-16	TNF/IL4/IL1B/NR3C1/NOS2/PTGS2/NOS3/NOS1/PPARG/NFKB1/PARP1/SRC/GPT/SOD1/BMP6/RORA/MTOR/CYP27B1/RORC/AKR1C3/TP53/CAV1/APOA1/EP300/BMP2/HIF1A/ENO1/NR1D1/PRKAA2/ADCYAP1R1/SIRT1/EPHX2/AKT1/CRY1/KIT/NR1H2/ZMPSTE24/EGR1/PPARA/CNR1/PPARGC1A/FABP1/INSR/PARK7/P2RY1/GCG/ARNT/BRCA1/SPHK2/ADIPOR1/SLC7A11/CES1/BHMT/PTK2B/NR4A3/FBP1/PRKAA1/FGF1/DNM1L/IRS1/NR1H3/PPARD/GPER1/SNCA/CD74	65	BP
GO:0048872	homeostasis of number of cells	60/1159	296/18903	1.27677e-16	2.32e-15	8.23183e-16	IL6/NOS3/HMOX1/CCR4/MIF/CSF1/CX3CR1/STAT1/HMGB1/LYN/CXCR2/MAPK14/BTK/CCR7/PLA2G2A/F2R/VEGFA/TNFSF13B/CASP3/PDE4B/SOD1/FAS/JAK2/ADAM17/G6PD/FOXO3/JAK3/NOTCH1/BAX/HIF1A/HSPA1A/XIAP/LAT/AKT1/BCL6/GBA1/KIT/ABL1/PRKDC/PRMT1/IKZF1/KCNQ1/CXCL6/PRDX1/SCNN1B/THRA/KMT2A/ARNT/SOS1/PRDX2/TRAF3IP2/BCL2L11/SLC40A1/BAK1/SLC7A11/KRAS/MTHFD1/EPAS1/INPP5D/CD74	60	BP
GO:0051384	response to glucocorticoid	40/1159	142/18903	1.31205e-16	2.38e-15	8.43419e-16	TNF/IL6/NR3C1/PTGS2/IL1RN/ARG1/RHOA/CASP3/FOS/HSD11B2/BMP6/JAK2/CPN1/FOXO3/CCND1/CYP1B1/GLB1/GBA1/ACVR1/IGF1R/CFLAR/MAOB/SMYD3/AQP1/ALPL/EIF4E/HSD3B1/FOSB/SDC1/CASP9/PCSK1/BCL2L11/PIK3CA/SSTR5/RPS6KB1/SERPINF1/UGT1A1/BCHE/BMI1/SRD5A1	40	BP
GO:1903201	regulation of oxidative stress-induced cell death	30/1159	80/18903	1.33591e-16	2.41e-15	8.56217e-16	TNF/TLR4/NFE2L2/PARP1/MMP3/FYN/SOD2/SOD1/CTNNB1/FOXO3/GPX1/HSPB1/HIF1A/SIRT1/AKT1/ABL1/VNN1/NOX1/TRPM2/PARK7/HDAC6/RIPK1/LRRK2/SLC7A11/PYCR1/NR4A3/TRAP1/PPIA/MCL1/GPR37	30	BP
GO:0051928	positive regulation of calcium ion transport	38/1159	129/18903	1.4663e-16	2.64e-15	9.37009e-16	CCL5/CCL2/CXCL10/CXCL12/F2R/CCR1/CX3CL1/PLCG2/G6PD/JAK3/CAV1/CASR/ORAI1/BAX/GSTO1/ADCYAP1R1/MS4A1/BDKRB1/F2/PDPK1/ABL1/CXCL11/TRPV2/P2RX1/GCG/PDGFRB/MCHR1/CACNA2D1/ATP2A1/SPHK2/BAK1/DRD1/GPER1/SNCA/PLCG1/CALM1/KCNE1/FFAR1	38	BP
GO:2001056	positive regulation of cysteine-type endopeptidase activity	40/1159	143/18903	1.71607e-16	3.08e-15	1.0934e-15	TNF/SMAD3/NOD1/NLRP3/PPARG/HMGB1/CASP8/XDH/CCN2/RHOA/F2R/LCK/FYN/CLEC7A/CASP1/FAS/JAK2/BAX/HSPD1/SIRT1/MALT1/MYC/RIPK2/F3/NLRP1/MAP3K5/ATP2A3/CFLAR/DLC1/BID/P2RX1/CASP9/SENP1/BCL2L11/HSPE1/BAK1/GRIN2A/MAPT/GPER1/SNCA	40	BP
GO:0034767	positive regulation of ion transmembrane transport	46/1159	186/18903	1.77865e-16	3.18e-15	1.12995e-15	ADRB2/CCL2/NOS1/CXCL10/EDNRA/IFNGR2/CCR2/ABCB1/ITGB1/ACE2/F2R/NPPA/CX3CL1/PLCG2/G6PD/ABCC8/CAV1/BAX/GSTO1/CTSS/ADCYAP1R1/MS4A1/BDKRB1/KCNMB1/F2/PDPK1/AGT/ABL1/FLNA/KCNQ1/CXCL11/OPRK1/P2RX1/SLC34A1/WNK1/KCNK3/CACNA2D1/ATP2A1/BAK1/KCNA1/DRD1/GPER1/SNCA/PLCG1/CALM1/KCNE1	46	BP
GO:0046718	viral entry into host cell	41/1159	151/18903	2.28408e-16	4.08e-15	1.4468e-15	ICAM1/CCR5/CD86/CD80/ITGB3/HMGB1/EGFR/DPP4/CXCR4/ITGB1/TNFRSF4/ACE2/SELPLG/TFRC/CAV1/CD209/HSPA1A/AGTR1/LGALS1/MRC1/ANPEP/CR1/PHB1/SLC1A5/IFNA2/CTSB/DAG1/ITCH/INSR/RPSA/CD81/JPT2/EPHA2/NPC1/GRK2/PIKFYVE/SCARB1/IFITM1/CDK1/CD74/CLEC4M	41	BP
GO:0051651	maintenance of location in cell	51/1159	226/18903	2.5094e-16	4.47e-15	1.58489e-15	CCR5/NOS1/ALB/TRPA1/CXCL10/PDE4D/ITGB3/TRPV1/LYN/LCN2/CCR7/F2R/LCK/CCL19/CX3CL1/PLCG2/CAV1/DDIT3/BAX/GSTO1/CCL21/BDKRB1/CACNA1C/AKT1/F2/ITPR1/PDPK1/ITPR2/PTPRC/ABL1/FLNA/CXCL11/HEXB/TRPM2/HSP90B1/SLC8A1/PARK7/RYR1/PTPN6/DRD2/ATP2A1/HSPA5/HK1/PRKACA/DIAPH1/DRD1/PTK2B/GPER1/SNCA/PLCG1/CALM1	51	BP
GO:0051701	biological process involved in interaction with host	48/1159	203/18903	2.68722e-16	4.77e-15	1.69225e-15	CXCL8/ICAM1/CCR5/CD86/CD80/ITGB3/HMGB1/EGFR/LTF/DPP4/CXCR4/ITGB1/TNFRSF4/ACE2/SELPLG/SRC/TFRC/CAV1/CD209/HSPA1A/AGTR1/LGALS1/MRC1/ANPEP/CR1/PHB1/SLC1A5/IFNA2/CTSB/DAG1/ITCH/INSR/BCL2L1/RPSA/CD81/VPS4B/JPT2/EPHA2/NPC1/ALYREF/GRK2/PIKFYVE/SCARB1/PPIA/IFITM1/CDK1/CD74/CLEC4M	48	BP
GO:1903169	regulation of calcium ion transmembrane transport	46/1159	188/18903	2.77181e-16	4.9e-15	1.74047e-15	TLR9/NOS1/CXCL10/PDE4D/ITGB3/CRHR1/LYN/F2R/FYN/PDE4B/NPPA/CX3CL1/PLCG2/G6PD/CAV1/BAX/GSTO1/FBXO11/ADCYAP1R1/MS4A1/BDKRB1/CACNA1C/F2/PDPK1/ABL1/ADRA2A/VDAC1/CXCL11/P2RX1/SLC8A1/PTPN6/CACNA2D1/DRD2/ATP2A1/BAK1/PRKACA/DIAPH1/DRD1/PTK2B/PSEN2/DRD3/GPER1/SNCA/PLCG1/CALM1/KCNE1	46	BP
GO:0043280	positive regulation of cysteine-type endopeptidase activity involved in apoptotic process	37/1159	125/18903	3.09065e-16	5.45e-15	1.93506e-15	TNF/SMAD3/NOD1/NLRP3/PPARG/HMGB1/CASP8/XDH/CCN2/RHOA/F2R/LCK/CLEC7A/CASP1/FAS/JAK2/BAX/HSPD1/SIRT1/MALT1/MYC/F3/NLRP1/MAP3K5/ATP2A3/CFLAR/DLC1/BID/P2RX1/CASP9/SENP1/BCL2L11/HSPE1/BAK1/MAPT/GPER1/SNCA	37	BP
GO:0006937	regulation of muscle contraction	44/1159	174/18903	3.32526e-16	5.85e-15	2.07595e-15	ADRB2/PTGS2/NOS1/PDE4D/CHRM3/TACR1/ADORA1/CCN2/ACE2/RHOA/F2R/HSP90AA1/PDE4B/ATP2A2/SOD1/PRKG1/NPPA/CALCA/CAV1/GSTO1/ENO1/SCN4A/CACNA1C/NMUR2/KIT/ADRA2A/KCNQ1/NR4A1/P2RX1/SLC8A1/MYH7/KCNMA1/ATP1A1/PDE5A/ATP2A1/TPM1/ADRA1A/KCNA1/PRKACA/GRK2/SPHK1/GPER1/CALM1/ADRA2C	44	BP
GO:0007565	female pregnancy	46/1159	189/18903	3.45128e-16	6.04e-15	2.14228e-15	IL1B/PTGS2/ARG1/ITGB3/CRHR1/MMP2/IDO1/PARP1/ACE2/VDR/VEGFA/CD38/AR/FOS/HSD11B2/SOD1/NPPA/CALCA/ESR1/THBD/CYP27B1/SPP1/ABCC8/ITGB4/PTHLH/AKT1/CBS/GJA1/AGT/ATP7A/ADRA2A/SLC2A1/DDR1/CNR1/CTSB/MEN1/FOSB/PRDM1/RARA/SMURF2/CAPN2/SPHK2/HPGD/PPARD/PGR/PGF	46	BP
GO:0071478	cellular response to radiation	46/1159	189/18903	3.45128e-16	6.04e-15	2.14228e-15	PTGS2/CREBBP/MMP1/MMP2/MAPK14/MME/PARP1/MMP3/LIG4/TP53/EP300/BAX/SIRT1/MYC/HYAL1/CRY1/CRY2/ZMPSTE24/MC1R/MDM2/PRKCD/EGR1/ATM/CHEK1/AQP1/CDKN1A/SFRP1/EEF1D/CASP9/ERCC1/BCL2L1/PIK3R1/TP53BP1/BRCA1/HSPA5/BAK1/GRK1/RAD51/NMT1/ELK1/GRB2/YAP1/CHEK2/ATR/HRAS/KCNE1	46	BP
GO:0001959	regulation of cytokine-mediated signaling pathway	43/1159	167/18903	3.54782e-16	6.19e-15	2.19592e-15	IRAK3/CCL5/IL6/GSTP1/IL1RN/IL1R1/ARG1/CSF1/PPARG/F2RL1/CASP8/ANGPT1/CXCR4/IRAK1/CASP1/TNFRSF1A/ADAM17/MAVS/IKBKB/CAV1/APOA1/HIF1A/HSPA1A/XIAP/RIPK2/IL36RN/PTPRC/NR1H2/CASP4/SAMHD1/IRGM/AGPAT1/PTPN6/RIPK1/TBK1/IKBKE/SHARPIN/SPHK1/OAS1/IRAK2/PTPN1/NR1H3/CD74	43	BP
GO:0003158	endothelium development	39/1159	139/18903	3.65815e-16	6.36e-15	2.25775e-15	TNF/IL1B/ICAM1/CXCL10/EDNRA/PDE4D/F2RL1/XDH/CXCR4/RHOA/VEGFA/BMP6/TNFRSF1A/CTNNB1/IKBKB/GPX1/ACVRL1/NOTCH1/KDR/RAPGEF3/NRG1/EDNRB/TJP1/S1PR1/ACVR1/PLCB1/CSNK2B/JAG1/S1PR3/FOXC2/SLC40A1/ROCK2/PDPN/ROCK1/FGF1/S1PR2/ZEB1/HPSE/RAP1A	39	BP
GO:0045444	fat cell differentiation	53/1159	244/18903	3.671e-16	6.37e-15	2.25924e-15	ADRB2/TNF/ALOX5/TGFB1/IL6/PTGS2/SMAD3/PPARG/CREB1/MAPK14/CEBPB/SOD2/RORA/ENPP1/RORC/CCND1/GPX1/EP300/DDIT3/BMP2/NR1D1/ADRB1/HMGA2/SIRT1/AKT1/CEBPA/DUSP10/SIX1/PLCB1/NR4A1/FABP4/PPARGC1A/SFRP1/JAG1/HDAC6/HES1/AXIN1/XBP1/TPH1/STK4/E2F1/NR4A3/PRDM16/SORT1/TCF7L2/CMKLR1/PIM1/YAP1/PPARD/ERAP1/GPER1/FFAR4/CEBPD	53	BP
GO:0044000	movement in host	45/1159	183/18903	4.78553e-16	8.28e-15	2.93682e-15	CXCL8/ICAM1/CCR5/CD86/CD80/ITGB3/HMGB1/EGFR/DPP4/CXCR4/ITGB1/TNFRSF4/ACE2/SELPLG/SRC/TFRC/CAV1/CD209/HSPA1A/AGTR1/LGALS1/MRC1/ANPEP/CR1/PHB1/SLC1A5/IFNA2/CTSB/DAG1/ITCH/INSR/RPSA/CD81/VPS4B/JPT2/EPHA2/NPC1/GRK2/PIKFYVE/SCARB1/PPIA/IFITM1/CDK1/CD74/CLEC4M	45	BP
GO:0010810	regulation of cell-substrate adhesion	50/1159	222/18903	5.37509e-16	9.27e-15	3.2893e-15	SMAD3/SERPINE1/ALOX15/CSF1/ITGB3/CCR7/RHOA/VEGFA/SRC/CX3CL1/JAK2/PTEN/RAC2/APOA1/ACVRL1/NOTCH1/KDR/COL1A1/CCL21/CDKN2A/FGG/DOCK1/BCL6/ABL1/FLNA/RAC1/MMP14/DLC1/TEK/DDR1/CDH13/THBS1/DAG1/BST1/MEN1/GSK3B/SFRP1/PTK2/JAG1/PIK3R1/ST6GAL1/STK4/ROCK2/CDC42/PTK2B/DUSP22/PDPN/ILK/ROCK1/CIB1	50	BP
GO:0007568	aging	43/1159	169/18903	5.67607e-16	9.76e-15	3.4637e-15	VCAM1/PTGS2/ARG1/EDNRA/NFE2L2/NQO1/MMP2/MME/CCN2/IRAK1/FOS/SOD2/SOD1/CX3CL1/CALCA/CYP1A1/FOXO3/CTSC/TFRC/GPX1/GPX4/EDNRB/KCNMB1/BECN1/CTNNA1/AGT/IGF1R/ALPL/NTRK1/CNR1/SLC12A2/DAG1/P2RY1/CASP9/APEX1/ERCC1/PDGFRB/ADRA1A/BAK1/RPS6KB1/SERPINF1/NUDT1/GRB2	43	BP
GO:0034284	response to monosaccharide	48/1159	207/18903	6.13515e-16	1.05e-14	3.73333e-15	TNF/ICAM1/PTGS2/IL1A/SMAD2/CCN2/RHOA/CASP3/SOD2/FOXO3/CASR/GPX1/ANO1/HIF1A/NR1D1/PRKAA2/NOX4/ADRA2A/PLCB1/IGF1R/EGR1/RAF1/SMARCA4/OPRK1/NCF1/THBS1/MEN1/SLC26A6/SLC8A1/GCG/PCSK1/KAT5/PIK3CA/PKLR/XBP1/RPS6KB1/HNF4A/PFKL/PRKACA/SERPINF1/OSBP/PTK2B/PRKAA1/TCF7L2/LIN28A/GPR68/PPARD/GPER1	48	BP
GO:0008630	intrinsic apoptotic signaling pathway in response to DNA damage	33/1159	102/18903	6.68585e-16	1.14e-14	4.05705e-15	TNF/HMOX1/MIF/CXCL12/SOD2/TNFRSF1A/MUC1/TP53/EP300/BAX/CLU/CD44/SIRT1/BCL2A1/ABL1/PRKDC/ATM/CDKN1A/BID/CASP9/BCL2L1/PIK3R1/BCL2L11/BRCA1/SFN/BAK1/EPHA2/E2F1/IKBKE/MCL1/CHEK2/CD74/ACKR3	33	BP
GO:0060191	regulation of lipase activity	31/1159	90/18903	6.85753e-16	1.17e-14	4.1496e-15	CCL5/CD86/EDNRA/C5AR1/SELE/EGFR/FLT1/RHOA/FGFR1/ESR1/APOA1/ABHD5/LRP1/ADCYAP1R1/P2RY12/AGTR1/PDPK1/AGT/KIT/NR1H2/ABL1/NMUR1/PHB1/ANG/PDGFRB/ADRA1A/PPT1/SORT1/NR1H3/HRAS/SNCA	31	BP
GO:1905952	regulation of lipid localization	45/1159	185/18903	7.42937e-16	1.26e-14	4.48311e-15	TNF/IL6/IL1B/IL1A/MIF/C3/PPARG/ITGB3/CRHR1/NFKBIA/NFKB1/PON1/BMP6/PTCH1/SHH/SPP1/CAV1/APOA1/ABHD5/ABCA1/PTGES/LRP1/ANXA2/SIRT1/AGTR1/AKT1/CRY1/CRY2/AGT/NR1H2/PRKCD/PPARA/REN/THBS1/EHD1/CYP4F2/GALR1/CES1/PCSK9/SCARB1/IKBKE/PNPLA2/MSR1/NR1H3/PPARD	45	BP
GO:0050708	regulation of protein secretion	54/1159	257/18903	8.73913e-16	1.48e-14	5.25881e-15	TNF/ALOX5/IL12B/TGFB1/CCL5/TLR4/IL6/IL1B/TLR2/NOS2/IL1A/PPARG/F2RL1/F2R/CD38/OPRM1/KCNJ11/BMP6/JAK2/ABCC8/CASR/ANO1/HIF1A/NR1D1/FGG/NR1H2/ADRA2A/ANG/CNR1/TRPM2/SLC12A2/ACHE/HMGCR/SFRP1/RBP4/GCG/PCSK1/PFKM/DRD2/SLC16A1/SSTR5/HNF4A/PFKL/OSBP/TCF7L2/DRD3/PPIA/GPR68/DNM1L/IRS1/NR1H3/PPARD/GPER1/FFAR1	54	BP
GO:1904064	positive regulation of cation transmembrane transport	43/1159	171/18903	9.00841e-16	1.52e-14	5.40343e-15	ADRB2/CCL2/NOS1/CXCL10/EDNRA/IFNGR2/CCR2/ACE2/F2R/NPPA/CX3CL1/PLCG2/G6PD/ABCC8/CAV1/BAX/GSTO1/CTSS/ADCYAP1R1/MS4A1/BDKRB1/KCNMB1/F2/PDPK1/AGT/ABL1/FLNA/KCNQ1/CXCL11/OPRK1/P2RX1/WNK1/KCNK3/CACNA2D1/ATP2A1/BAK1/KCNA1/DRD1/GPER1/SNCA/PLCG1/CALM1/KCNE1	43	BP
GO:0032615	interleukin-12 production	26/1159	63/18903	9.07923e-16	1.52e-14	5.40343e-15	IL12B/IRAK3/TLR4/TLR2/NOD2/TLR9/IRF1/TLR3/HMGB1/TNFSF4/NFKB1/MAPK14/IDO1/CCR7/CLEC7A/CCL19/PLCG2/JAK3/TRAF6/LTB/HSPD1/RIPK2/RELA/PLCB1/THBS1/CMKLR1	26	BP
GO:0032655	regulation of interleukin-12 production	26/1159	63/18903	9.07923e-16	1.52e-14	5.40343e-15	IL12B/IRAK3/TLR4/TLR2/NOD2/TLR9/IRF1/TLR3/HMGB1/TNFSF4/NFKB1/MAPK14/IDO1/CCR7/CLEC7A/CCL19/PLCG2/JAK3/TRAF6/LTB/HSPD1/RIPK2/RELA/PLCB1/THBS1/CMKLR1	26	BP
GO:0032757	positive regulation of interleukin-8 production	26/1159	63/18903	9.07923e-16	1.52e-14	5.40343e-15	TNF/CD14/TLR4/IL6/IL1B/TLR2/NOS2/NOD2/TLR9/NOD1/SERPINE1/TLR1/TLR3/F2RL1/HMGB1/TLR5/F2R/CLEC7A/MAVS/DDIT3/HSPA1A/F3/RELA/PARK7/RIPK1/CD74	26	BP
GO:0033135	regulation of peptidyl-serine phosphorylation	39/1159	143/18903	1.0466e-15	1.75e-14	6.21171e-15	TNF/TGFB1/IL6/PTGS2/NOS1/MIF/PDE4D/EGFR/ANGPT1/VEGFA/HSP90AA1/PTEN/TFRC/CAV1/BAX/RAPGEF3/CD44/RIPK2/NSD1/AKT1/HAX1/DKK1/FNIP1/RAF1/SMYD3/IFNA2/IRGM/PARK7/GCG/HDAC6/PIK3CA/AXIN1/IFNA6/BAK1/STK4/TBK1/ARAF/PRKAA1/SNCA	39	BP
GO:0001894	tissue homeostasis	56/1159	275/18903	1.08934e-15	1.82e-14	6.44769e-15	ADRB2/TLR4/IL6/PTGS2/NOD2/TLR9/NOS3/ALB/CSF1/ITGB3/ANGPT1/LTF/PRKCA/ITGB1/CCN2/SERPINA3/F2R/VEGFA/CD38/SRC/SOD1/CALCA/CTNNB1/SPP1/ABCC8/TRAF6/TFRC/NOTCH1/TF/BAX/MC4R/HSPB1/KDR/XIAP/COL2A1/TJP1/S1PR1/GJA1/CSF1R/NOX4/SLC2A1/SLC12A2/CTSK/ACTB/RBP4/PRDX1/KMT2A/CDH3/LPCAT1/KRAS/EPAS1/PTK2B/ACACA/INPP5D/OAS1/YAP1	56	BP
GO:0042326	negative regulation of phosphorylation	68/1159	381/18903	1.09955e-15	1.83e-14	6.49036e-15	IRAK3/TGFB1/GSTP1/IL1B/JUN/PPARG/PDE4D/LYN/ANGPT1/XDH/DUSP1/CASP3/NPPA/ENPP1/PTEN/CAV1/BMP2/BAX/HSPB1/LRP1/BDKRB1/SIRT1/AKT1/CDKN2A/CEBPA/PDPK1/DKK1/AGT/PTPRC/GBA1/DUSP10/ABL1/PRKCD/PRKDC/DVL1/APC/PPARA/SMYD3/FABP4/PLEC/CDKN1A/MEN1/PLK1/HMGCR/SFRP1/SLC8A1/PARK7/PTPN6/DRD2/YWHAG/SFN/DNAJA1/IPO7/LRRK2/BAK1/FBP1/MAPT/PIP4K2A/AKT1S1/DUSP22/HEXIM1/PPIA/ROCK1/PTPN1/SNCA/DUSP6/CALM1/CIB1	68	BP
GO:0042692	muscle cell differentiation	71/1159	409/18903	1.12981e-15	1.87e-14	6.65089e-15	IL4R/IL4/TGFB1/NOS1/CXCL10/EDNRA/MAPK14/ITGB1/VEGFA/CASP3/ATP2A2/SOD2/RORA/SHH/CTNNB1/MTOR/G6PD/GPX1/NOTCH1/IFRD1/BMP2/NRG1/EDNRB/SIRT1/AKT1/DOCK1/DKK1/AGT/ACVR1/KIT/SIX1/NFATC1/NOX4/ZMPSTE24/MDM2/CFLAR/MMP14/PPARA/CTH/PTBP1/SMYD3/PLEC/LAMA1/SLC8A1/SDC1/RYR1/EHD1/RARA/MYH7/PDGFRB/CD81/HES1/DNMT1/PTCD2/TPM1/CAPN2/CACNA1H/YBX1/RARB/ADRA1A/XBP1/KRAS/FLOT1/PIEZO1/MAP2K4/SORT1/EREG/GPER1/ZEB1/CDK1/CSR…	71	BP
GO:0030324	lung development	45/1159	187/18903	1.14544e-15	1.89e-14	6.72463e-15	TNF/NOS3/SMAD2/LTA4H/ARG1/CREB1/MME/CYP1A2/CCN2/MAPK3/VEGFA/MAPK1/SHH/CTNNB1/NOTCH1/EP300/KDR/CEBPA/ATP7A/PKD1/MMP14/EIF4E/MAP2K1/DAG1/LAMA1/RBP4/HSD11B1/THRB/ALDH1A2/PDGFA/YWHAZ/THRA/PDGFRB/HES1/SLC7A11/KRAS/CDC42/EPAS1/PDPN/ELK1/FGF1/YAP1/RXFP1/MAP2K2/PGR	45	BP
GO:0014068	positive regulation of phosphatidylinositol 3-kinase signaling	29/1159	80/18903	1.23819e-15	2.04e-14	7.24946e-15	TNF/CCL5/IL18/F2RL1/ANGPT1/FLT1/F2R/SRC/JAK2/FGFR1/ERBB4/KDR/SIRT1/F2/BECN1/HAX1/AGT/KIT/IGF1R/TEK/NCF1/NTRK1/PTK2/INSR/PDGFA/PTPN6/PDGFRB/PPARD/GPER1	29	BP
GO:0019058	viral life cycle	61/1159	319/18903	1.25889e-15	2.07e-14	7.3508e-15	TNF/CXCL8/CCL5/ICAM1/CCL2/CCR5/CD86/CD80/ITGB3/HMGB1/EGFR/LTF/DPP4/CXCR4/ITGB1/TNFRSF4/ACE2/SELPLG/MAVS/IFIH1/TFRC/CAV1/NOTCH1/CD209/APOBEC3C/HSPA1A/HMGA2/AGTR1/LGALS1/MRC1/ANPEP/CR1/PHB1/PPARA/SLC1A5/HSPA8/IFNA2/CTSB/DAG1/ITCH/INSR/SETDB1/RPSA/CD81/VPS4B/PABPC1/JPT2/EPHA2/NPC1/EEF1A1/GRK2/PIKFYVE/SCARB1/TOP2B/APOBEC3B/PPIA/OAS1/IFITM1/CDK1/CD74/CLEC4M	61	BP
GO:0045621	positive regulation of lymphocyte differentiation	37/1159	130/18903	1.26318e-15	2.07e-14	7.35606e-15	IL12B/IL4R/IL4/IL18/NLRP3/CD86/IL12RB1/CD80/TNFSF4/BTK/RHOA/CCL19/SHH/FOXO3/RUNX1/VSIR/MALT1/RIPK2/BCL6/PTPRC/DUSP10/CR1/PRKDC/MMP14/VNN1/SMARCA4/IL1RL2/ACTB/SMARCD2/BRD7/RARA/RASGRP1/LEF1/KAT5/XBP1/INPP5D/CD74	37	BP
GO:0042311	vasodilation	23/1159	49/18903	1.3182e-15	2.16e-14	7.65589e-15	ADRB2/TNF/NOS3/NOS1/F2RL1/ADORA1/SOD2/SOD1/PRKG1/NPPA/CALCA/CASR/GPX1/ADRB1/EDNRB/KCNMB1/AGT/ADRA2A/KCNMA1/DRD1/ITGA1/PPARD/GPER1	23	BP
GO:0060541	respiratory system development	48/1159	211/18903	1.36855e-15	2.23e-14	7.92706e-15	TNF/NOS3/SMAD2/LTA4H/ARG1/CREB1/MME/CYP1A2/CCN2/MAPK3/VEGFA/MAPK1/SHH/CTNNB1/NOTCH1/EP300/KDR/CEBPA/SIX1/ATP7A/PKD1/MMP14/EIF4E/MAP2K1/DAG1/LAMA1/RBP4/HSD11B1/THRB/ALDH1A2/PDGFA/YWHAZ/RARA/THRA/PDGFRB/LEF1/HES1/SLC7A11/KRAS/CDC42/EPAS1/PDPN/ELK1/FGF1/YAP1/RXFP1/MAP2K2/PGR	48	BP
GO:0071559	response to transforming growth factor beta	56/1159	277/18903	1.52048e-15	2.47e-14	8.77571e-15	IL4/TGFB1/NR3C1/SMAD3/IL17F/SMAD2/ARG1/JUN/PPARG/CX3CR1/CREBBP/HDAC2/PARP1/HDAC1/FYN/FOS/SRC/TGFBR1/ADAM17/TP53/CAV1/ACVRL1/EP300/BMP2/COL1A1/HSPA1A/SIRT1/PIN1/PDPK1/COL1A2/ACVR1/NFATC1/ABL1/TET1/IGF1R/MAP3K7/CFLAR/STUB1/PPARA/USP15/THBS1/CTSK/MEN1/SFRP1/PTK2/PDGFA/SMURF2/HSPA5/AXIN1/ROCK2/PRDM16/DUSP22/HPGD/ROCK1/ZEB1/STK16	56	BP
GO:0001933	negative regulation of protein phosphorylation	63/1159	338/18903	1.52317e-15	2.47e-14	8.77571e-15	IRAK3/TGFB1/GSTP1/IL1B/JUN/PPARG/PDE4D/LYN/ANGPT1/XDH/DUSP1/CASP3/NPPA/ENPP1/PTEN/CAV1/BMP2/BAX/HSPB1/LRP1/BDKRB1/SIRT1/AKT1/CDKN2A/CEBPA/PDPK1/DKK1/AGT/PTPRC/GBA1/DUSP10/ABL1/PRKCD/PRKDC/DVL1/APC/SMYD3/FABP4/PLEC/CDKN1A/MEN1/PLK1/HMGCR/SFRP1/SLC8A1/PARK7/PTPN6/DRD2/YWHAG/SFN/DNAJA1/IPO7/LRRK2/BAK1/AKT1S1/DUSP22/HEXIM1/PPIA/PTPN1/SNCA/DUSP6/CALM1/CIB1	63	BP
GO:0098657	import into cell	53/1159	252/18903	1.55309e-15	2.51e-14	8.92436e-15	TNF/NOS1/ARG1/ITGB3/TRPV1/ITGB1/ACE2/FYN/KCNJ11/ABCC8/ATP4A/SLC22A4/SCNN1A/SLC6A12/MS4A1/CACNA1C/AKT1/AGT/KCNQ1/GRM1/SLC2A1/SCNN1G/TRPV2/SLC1A5/KCNJ1/SLC5A1/THBS1/TRPM2/SLC12A2/ACTB/P2RX1/SLC34A1/SLC8A1/PARK7/SCNN1B/WNK1/ATP1A1/CACNA2D1/DRD2/SLC22A1/SLC7A11/RPS6KB1/SLC12A1/SLC46A1/DRD1/FLOT1/TRPV5/DRD3/SLC7A5/SLC18A1/SLC27A1/KCNJ5/SNCA	53	BP
GO:0014066	regulation of phosphatidylinositol 3-kinase signaling	34/1159	111/18903	1.57282e-15	2.54e-14	9.01382e-15	TNF/CCL5/IL18/F2RL1/EGFR/ANGPT1/FLT1/F2R/SRC/JAK2/FGFR1/PTEN/ERBB4/KDR/SIRT1/F2/BECN1/HAX1/AGT/KIT/IGF1R/TEK/NCF1/NTRK1/PIP5K1B/PTK2/INSR/PDGFA/PTPN6/PIP5K1A/PDGFRB/RASGRP1/PPARD/GPER1	34	BP
GO:0032602	chemokine production	32/1159	99/18903	1.89731e-15	3.06e-14	1.08448e-14	TNF/IL4R/TLR4/IL6/IL33/GSTP1/IL1B/TLR2/IL18/NOD2/IL6R/TLR9/IL17F/HMOX1/MIF/TLR3/F2RL1/HMGB1/TNFSF4/CLEC7A/ADAM17/MAVS/ACKR1/TREM1/HIF1A/RIPK2/CSF1R/EGR1/CXCL6/EPHA2/OAS1/CD74	32	BP
GO:0032722	positive regulation of chemokine production	27/1159	70/18903	1.94128e-15	3.12e-14	1.10638e-14	TNF/IL4R/TLR4/IL6/IL33/IL1B/TLR2/IL18/NOD2/IL6R/TLR9/IL17F/HMOX1/MIF/TLR3/F2RL1/HMGB1/TNFSF4/CLEC7A/ADAM17/MAVS/HIF1A/RIPK2/CSF1R/EGR1/OAS1/CD74	27	BP
GO:0019915	lipid storage	30/1159	87/18903	1.94583e-15	3.12e-14	1.10638e-14	TNF/IL6/IL1B/C3/PPARG/ITGB3/NFKBIA/NFKB1/ENPP1/CAV1/APOA1/ABHD5/ABCA1/SIRT1/CRY1/CRY2/GBA1/SOAT1/NR1H2/PPARA/HEXB/EHD1/DGAT1/CES1/SCARB1/IKBKE/PNPLA2/MSR1/NR1H3/PPARD	30	BP
GO:0050866	negative regulation of cell activation	49/1159	221/18903	2.04886e-15	3.27e-14	1.1619e-14	IL4R/IL4/NOS3/IRF1/HMOX1/CD86/ARG1/CD80/HMGB1/LYN/TNFSF4/CCR2/IDO1/BTK/CASP3/CEBPB/PRKG1/CX3CL1/SHH/THBD/JAK3/PTEN/RUNX1/ERBB2/NR1D1/VSIR/FGG/F2/CD274/BCL6/PTPRC/CR1/PRKCD/PDCD1LG2/CNR2/ATM/IFNA2/CNR1/SFRP1/ITCH/PDGFA/PTPN6/PRDX2/PDE5A/INPP5D/DUSP22/NR1H3/GPER1/CD74	49	BP
GO:0031668	cellular response to extracellular stimulus	54/1159	262/18903	2.0777e-15	3.31e-14	1.17518e-14	VCAM1/HMOX1/ALB/NFE2L2/LYN/AOC1/VDR/MAPK3/FOS/FAS/MAPK1/MTOR/CYP27B1/FOXO3/AKR1C3/TP53/CASR/MAPK8/COL1A1/PRKAA2/NCOA1/SIRT1/CBS/MAP3K5/BECN1/PTPRC/GBA1/IGF1R/FNIP1/SLC2A1/PPARA/HSPA8/ATG7/GSDMD/PLEC/CDKN1A/CTSK/SFRP1/SLC34A1/FADS1/KAT5/HSPA5/LRRK2/XBP1/PCSK9/PRKAA1/SLC7A5/MAP1LC3B/NUDT1/SUV39H1/PIM1/SRD5A1/MAP1LC3A/KLF10	54	BP
GO:0070304	positive regulation of stress-activated protein kinase signaling cascade	37/1159	132/18903	2.1709e-15	3.45e-14	1.2247e-14	TNF/TLR4/IL1B/NOD2/TLR9/IL1A/NOD1/TLR3/F2RL1/HMGB1/LYN/XDH/CCR7/CCN2/MMP8/VEGFA/CCL19/TRAF6/BMP2/CCL21/XIAP/RIPK2/MAP3K5/PLCB1/PRMT1/NOX1/OPRK1/NCF1/RASGRP1/RIPK1/AXIN1/PTK2B/MAP2K4/DUSP22/SPHK1/HRAS/TAOK1	37	BP
GO:0050890	cognition	60/1159	314/18903	2.24179e-15	3.55e-14	1.26141e-14	TNF/TLR2/PTGS2/C5AR1/CX3CR1/EGFR/TACR1/CREB1/ADORA1/ITGB1/CHRM1/MME/FYN/CASP3/CEBPB/FOS/HRH3/SRC/MAPK1/ABCC8/PTEN/EP300/HIF1A/RAPGEF3/YTHDF1/DKK1/AGT/KIT/GLP1R/ABL1/PLCB1/VDAC1/OPRK1/NTRK1/CNR1/HMGCR/INSR/MAN2B1/GRM5/ASIC1/SGK1/THRA/KMT2A/FEN1/DRD2/SLC7A11/RPS6KB1/KRAS/PPT1/DRD1/SERPINF1/BCHE/ADCY1/GRIN2A/MAPT/PICALM/DRD3/TPBG/SCN2A/GRIA1	60	BP
GO:0006809	nitric oxide biosynthetic process	28/1159	76/18903	2.36178e-15	3.73e-14	1.32548e-14	TNF/TLR4/IL1B/NOS2/PTGS2/SMAD3/NOS3/NOS1/CX3CR1/NQO1/TRPV1/MMP8/HSP90AA1/CLEC7A/SOD2/RORA/JAK2/CAV1/CLU/CYP1B1/AKT1/AGT/RAC1/INSR/ROCK2/PTK2B/KLRK1/DDAH1	28	BP
GO:0008016	regulation of heart contraction	48/1159	214/18903	2.46169e-15	3.88e-14	1.37798e-14	TNF/NOS3/NOS1/EDNRA/PDE4D/TRPV1/ADORA1/CCN2/ACE2/ADORA3/HSP90AA1/PDE4B/ATP2A2/NPPA/JAK2/CALCA/CAV1/GSTO1/ADRB1/EDNRB/CACNA1C/GJA1/ATP2A3/AGT/GLP1R/ZMPSTE24/MDM2/FLNA/KCNQ1/HBEGF/THRB/SLC8A1/THRA/MYH7/ATP1A1/CACNA2D1/PDE5A/DRD2/ATP2A1/TPM1/CACNA1H/ADRA1A/PRKACA/EPAS1/GRK2/KCNJ5/CALM1/KCNE1	48	BP
GO:0038093	Fc receptor signaling pathway	24/1159	55/18903	2.51031e-15	3.95e-14	1.40158e-14	LYN/BTK/LCK/FYN/SRC/PLCG2/IKBKB/TRAF6/MAPK8/PRKCQ/PTPRC/KIT/ABL1/PRKCD/MAP3K7/MAP3K1/MAPK10/PTK2/SOS1/HCK/LIMK1/NR4A3/MAP2K4/PLCG1	24	BP
GO:0046209	nitric oxide metabolic process	29/1159	82/18903	2.64905e-15	4.16e-14	1.47524e-14	TNF/TLR4/IL1B/TLR2/NOS2/PTGS2/SMAD3/NOS3/NOS1/CX3CR1/NQO1/TRPV1/MMP8/HSP90AA1/CLEC7A/SOD2/RORA/JAK2/CAV1/CLU/CYP1B1/AKT1/AGT/RAC1/INSR/ROCK2/PTK2B/KLRK1/DDAH1	29	BP
GO:0030323	respiratory tube development	45/1159	191/18903	2.66874e-15	4.18e-14	1.48239e-14	TNF/NOS3/SMAD2/LTA4H/ARG1/CREB1/MME/CYP1A2/CCN2/MAPK3/VEGFA/MAPK1/SHH/CTNNB1/NOTCH1/EP300/KDR/CEBPA/ATP7A/PKD1/MMP14/EIF4E/MAP2K1/DAG1/LAMA1/RBP4/HSD11B1/THRB/ALDH1A2/PDGFA/YWHAZ/THRA/PDGFRB/HES1/SLC7A11/KRAS/CDC42/EPAS1/PDPN/ELK1/FGF1/YAP1/RXFP1/MAP2K2/PGR	45	BP
GO:0010720	positive regulation of cell development	59/1159	307/18903	2.94041e-15	4.59e-14	1.62912e-14	TNF/TGFB1/IL6/IL33/IL1B/TLR2/LTA/CX3CR1/ITGB3/LYN/HDAC2/CXCL12/CXCR4/ITGB1/MME/VEGFA/HDAC1/OPRM1/CLEC7A/CX3CL1/SHH/LIG4/CTNNB1/MTOR/APOA1/NOTCH1/BMP2/HIF1A/FGG/DOCK1/KIT/ABL1/FLNA/PRKDC/RAC1/TRPV2/MAP2K1/DAG1/GRM5/HES1/PDE5A/DRD2/KRAS/E2F1/AURKA/CDC42/LIMK1/SERPINF1/MAPT/PRKCH/SLC7A5/ILK/S1PR2/GPR68/GPER1/MAP2K2/PAK3/CIB1/TRPC5	59	BP
GO:0007611	learning or memory	55/1159	273/18903	3.19423e-15	4.97e-14	1.76523e-14	TLR2/PTGS2/CX3CR1/EGFR/TACR1/CREB1/ITGB1/MME/FYN/CASP3/CEBPB/FOS/SRC/MAPK1/ABCC8/PTEN/EP300/HIF1A/RAPGEF3/YTHDF1/DKK1/AGT/KIT/GLP1R/ABL1/PLCB1/VDAC1/OPRK1/NTRK1/CNR1/HMGCR/INSR/MAN2B1/GRM5/ASIC1/SGK1/THRA/KMT2A/FEN1/DRD2/SLC7A11/RPS6KB1/KRAS/PPT1/DRD1/SERPINF1/BCHE/ADCY1/GRIN2A/MAPT/PICALM/DRD3/TPBG/SCN2A/GRIA1	55	BP
GO:0034605	cellular response to heat	26/1159	66/18903	3.51831e-15	5.46e-14	1.93938e-14	PTGS2/IL1A/HMOX1/CXCL10/CREBBP/TRPV1/LYN/HDAC2/HSP90AA1/IRAK1/MTOR/EP300/ANO1/HSPA1A/SIRT1/STUB1/ATM/THBS1/GSK3B/BAG3/DNAJB6/PRKACA/MAPT/MAPKAPK2/FGF1/ATR	26	BP
GO:0060562	epithelial tube morphogenesis	62/1159	335/18903	3.62361e-15	5.6e-14	1.98818e-14	TNF/TGFB1/NR3C1/SMAD3/CXCL10/EDNRA/CSF1/CXCR2/CXCR4/VDR/RHOA/VEGFA/CASP3/AR/SRC/PTCH1/SHH/ST14/CTNNB1/ESR1/TRAF6/CASR/ACVRL1/NOTCH1/BMP2/HIF1A/KDR/BRD2/MYC/CSF1R/AGT/ACVR1/SIX1/ABL1/DVL1/CSNK2B/PKD1/MMP14/DLC1/DDR1/DAG1/LAMA1/SFRP1/RARA/LEF1/HES1/FOXC2/KRAS/STK4/MTHFD1/EPHA2/SETD2/PRKACA/PRKACB/DVL2/OPA1/MTHFD1L/KIF20B/ILK/FGF1/YAP1/PGR	62	BP
GO:2001243	negative regulation of intrinsic apoptotic signaling pathway	32/1159	101/18903	3.62519e-15	5.6e-14	1.98818e-14	PTGS2/MIF/NFE2L2/CXCL12/HDAC1/SRC/SOD2/MUC1/GPX1/HSPB1/HIF1A/ENO1/CLU/HSPA1A/CD44/SIRT1/AKT1/MDM2/HYOU1/BID/PARK7/BCL2L1/DNAJA1/LRRK2/XBP1/OPA1/TRAP1/PPIA/PTPN1/MCL1/CD74/ACKR3	32	BP
GO:2001057	reactive nitrogen species metabolic process	29/1159	83/18903	3.83635e-15	5.91e-14	2.09867e-14	TNF/TLR4/IL1B/TLR2/NOS2/PTGS2/SMAD3/NOS3/NOS1/CX3CR1/NQO1/TRPV1/MMP8/HSP90AA1/CLEC7A/SOD2/RORA/JAK2/CAV1/CLU/CYP1B1/AKT1/AGT/RAC1/INSR/ROCK2/PTK2B/KLRK1/DDAH1	29	BP
GO:1900407	regulation of cellular response to oxidative stress	31/1159	95/18903	3.86855e-15	5.95e-14	2.11096e-14	TNF/ALOX5/TLR4/NFE2L2/PARP1/MMP3/FYN/SOD2/SOD1/CTNNB1/FOXO3/GPX1/HSPB1/HIF1A/SIRT1/AKT1/ABL1/VNN1/NOX1/TRPM2/PARK7/HDAC6/RIPK1/LRRK2/SLC7A11/PYCR1/NR4A3/TRAP1/PPIA/MCL1/GPR37	31	BP
GO:0031623	receptor internalization	35/1159	121/18903	4.3075e-15	6.61e-14	2.34457e-14	CXCL8/ITGB2/ITGB3/SELE/CXCR1/CXCR2/ANGPT1/ITGB1/VEGFA/PLCG2/TFRC/CAV1/LRP1/ANXA2/ARRB1/DKK1/RAMP1/CD63/ACHE/INSR/CD81/DRD2/CLTC/ARF1/FLOT1/GRK2/DNM1/PCSK9/PICALM/DRD3/AP2A1/GRB2/GRIA1/SNCA/ACKR3	35	BP
GO:0032735	positive regulation of interleukin-12 production	21/1159	42/18903	4.52203e-15	6.92e-14	2.45518e-14	IL12B/TLR4/TLR2/NOD2/TLR9/IRF1/TLR3/HMGB1/TNFSF4/MAPK14/IDO1/CCR7/CLEC7A/CCL19/PLCG2/TRAF6/LTB/HSPD1/RIPK2/RELA/PLCB1	21	BP
GO:0010742	macrophage derived foam cell differentiation	20/1159	38/18903	5.59446e-15	8.54e-14	3.02984e-14	TGFB1/IL18/CSF2/CSF1/PPARG/ITGB3/STAT1/NFKBIA/NFKB1/PLA2G2A/EP300/ABCA1/AGTR1/AGT/SOAT1/NR1H2/PPARA/PRKCH/MSR1/NR1H3	20	BP
GO:0031294	lymphocyte costimulation	22/1159	47/18903	5.91629e-15	9.01e-14	3.19615e-14	IL4/CD86/CD80/LYN/TNFSF4/DPP4/CCR7/LCK/TNFSF13B/FYN/SRC/CCL19/CAV1/CCL21/AKT1/LGALS1/CD274/PDCD1LG2/PTPN6/CD81/PIK3CA/KLRK1	22	BP
GO:0010001	glial cell differentiation	49/1159	227/18903	6.27709e-15	9.53e-14	3.38263e-14	TNF/TGFB1/TLR4/IL6/IL33/IL1B/TLR2/C5AR1/LYN/HDAC2/CXCR4/RHOA/MAPK3/HDAC1/SOD1/MAPK1/SHH/CTNNB1/MTOR/PTEN/ITGB4/ERBB2/NOTCH1/BMP2/ANO1/LRP1/NR1D1/CLU/NRG1/AKT1/F2/GBA1/DUSP10/ABL1/PLEC/MAP2K1/DAG1/LEF1/HES1/FGF5/KRAS/DRD1/TRPC4/MAPT/DRD3/LIN28A/ILK/ADGRG6/CDK1	49	BP
GO:0002437	inflammatory response to antigenic stimulus	28/1159	79/18903	7.50215e-15	1.13e-13	4.02278e-14	TNF/IL12B/CYSLTR1/LTA/NOD2/IL1RN/C3/HMGB1/LYN/CXCR2/MAPK14/BTK/CCR7/FYN/OPRM1/SRC/IL37/GPX1/NOTCH1/IL36RN/IL36G/CNR1/PARK7/CD81/RASGRP1/PSMA1/HCK/PLCG1	28	BP
GO:0007193	adenylate cyclase-inhibiting G protein-coupled receptor signaling pathway	28/1159	79/18903	7.50215e-15	1.13e-13	4.02278e-14	EDNRA/CHRM3/ITGB3/ADORA1/CHRM1/OPRM1/HRH3/HRH4/CASR/FPR2/P2RY12/S1PR1/PSAP/ADRA2A/FLNA/GRM1/OXER1/OPRK1/P2RY1/GRM5/S1PR3/MCHR1/DRD2/GNAI1/DRD3/GABBR1/GPR37/CHRM5	28	BP
GO:0032874	positive regulation of stress-activated MAPK cascade	36/1159	130/18903	7.87059e-15	1.19e-13	4.20992e-14	TNF/TLR4/IL1B/NOD2/TLR9/IL1A/NOD1/TLR3/F2RL1/HMGB1/XDH/CCR7/CCN2/MMP8/VEGFA/CCL19/TRAF6/BMP2/CCL21/XIAP/RIPK2/MAP3K5/PLCB1/PRMT1/NOX1/OPRK1/NCF1/RASGRP1/RIPK1/AXIN1/PTK2B/MAP2K4/DUSP22/SPHK1/HRAS/TAOK1	36	BP
GO:0060193	positive regulation of lipase activity	26/1159	68/18903	8.26537e-15	1.24e-13	4.4102e-14	CCL5/CD86/EDNRA/C5AR1/SELE/EGFR/FLT1/RHOA/FGFR1/ESR1/APOA1/ABHD5/ADCYAP1R1/P2RY12/AGTR1/PDPK1/AGT/KIT/NR1H2/NMUR1/PHB1/ANG/PDGFRB/ADRA1A/NR1H3/HRAS	26	BP
GO:0022411	cellular component disassembly	77/1159	483/18903	8.36146e-15	1.25e-13	4.45051e-14	ADRB2/TNF/IRAK3/TGFB1/IL6/C3/CX3CR1/F2RL1/ITGAM/MMP1/TPSAB1/MMP2/DPP4/PRKCA/MMP8/MMP3/TGFBR1/ATP2A2/CX3CL1/ABCC8/TP53/BAX/MMP7/HIF1A/LRP1/CFL1/PRKAA2/CTSS/MYC/BECN1/HAX1/DKK1/GBA1/ZMPSTE24/IGF1R/VDAC1/ADAMTS4/APC/MMP14/HSPA8/ATG7/DDR1/SMARCA4/ATG4B/CTSK/GSK3B/PLK1/MMP13/SMARCD2/INSR/IRGM/PARK7/PIK3R1/HDAC6/KAT5/VPS4B/HUWE1/PRSS1/PIK3CA/SQSTM1/AURKA/KIF5B/FLOT1/VRK1/PRKAA1/PNPLA2/MAP1LC3B/SHARPIN/…	77	BP
GO:0016049	cell growth	78/1159	493/18903	8.48333e-15	1.27e-13	4.50431e-14	TGFB1/SMAD3/EDNRA/EGFR/CXCL12/CDH1/CXCR4/ITGB1/RHOA/VEGFA/HSP90AA1/CD38/TGFBR1/ENPP1/CTNNB1/MTOR/CYP27B1/ADAM17/G6PD/SPP1/TP53/ERBB2/ACVRL1/IFRD1/ENO1/HSPA1A/RPS6KA3/PRKCQ/BDKRB1/SIRT1/AGTR1/AKT1/CDKN2A/HYAL1/F2/DCLK1/GJA1/BCL6/AGT/RPS6KA1/ABL1/PHB1/DVL1/MMP14/PPARA/TRPV2/DDR1/SMARCA4/HBEGF/CDKN1A/GSK3B/SFRP1/ITCH/SGK1/HDAC6/ESR2/SFN/SPHK2/ADRA1A/ADIPOR1/HNF4A/AURKA/CDC42/LIMK1/PPT1/PTK2B/FBP1/MA…	78	BP
GO:0002253	activation of immune response	68/1159	397/18903	9.15227e-15	1.37e-13	4.8476e-14	TLR4/IL1B/NOD2/TLR9/MBL2/C5AR1/C3/PDE4D/CREBBP/HMGB1/LYN/BTK/CCR7/LCK/HSP90AA1/CD38/FYN/CLEC7A/PDE4B/SRC/MAPK1/CFH/PLCG2/MAVS/IKBKB/TRAF6/EP300/FPR2/BAX/ICOSLG/CLU/CFD/MS4A1/MALT1/RIPK2/PTPRC/RELA/ABL1/CR1/IKBKG/PRKCD/MAP3K7/PHB1/PRKDC/MASP1/FPR1/PTK2/PTPN6/WNK1/CD81/PIK3CA/HCK/C1S/RNF31/LIMK1/TBK1/CGAS/NR4A3/KLRK1/PRKCH/INPP5D/DUSP22/HEXIM1/HLA-DRB3/CMKLR1/HRAS/PAK3/PLCG1	68	BP
GO:0042100	B cell proliferation	32/1159	104/18903	9.2568e-15	1.38e-13	4.89101e-14	IL4/TLR4/TLR9/MIF/LYN/BTK/AHR/TNFRSF4/TNFSF13B/CD38/CASP3/PTEN/TFRC/BAX/HSPD1/MS4A1/BCL6/PTPRC/ABL1/PRKCD/ATM/IFNA2/CDKN1A/BST1/CD81/RASGRP1/LEF1/IFNA6/CTPS1/INPP5D/BMI1/CD74	32	BP
GO:0071560	cellular response to transforming growth factor beta stimulus	54/1159	271/18903	9.28663e-15	1.38e-13	4.89484e-14	IL4/TGFB1/NR3C1/SMAD3/IL17F/SMAD2/ARG1/JUN/PPARG/CX3CR1/CREBBP/HDAC2/PARP1/HDAC1/FYN/FOS/SRC/TGFBR1/ADAM17/TP53/CAV1/ACVRL1/EP300/BMP2/COL1A1/HSPA1A/SIRT1/PIN1/PDPK1/COL1A2/ACVR1/NFATC1/ABL1/TET1/IGF1R/MAP3K7/CFLAR/STUB1/PPARA/USP15/THBS1/CTSK/MEN1/SFRP1/PTK2/PDGFA/SMURF2/HSPA5/AXIN1/PRDM16/DUSP22/HPGD/ZEB1/STK16	54	BP
GO:0048608	reproductive structure development	58/1159	306/18903	9.60379e-15	1.42e-13	5.03899e-14	TLR9/IL1A/NOS3/C3/TLR3/MMP2/VEGFA/CASP3/CEBPB/AR/SRC/TGFBR1/SOD1/BMP6/PTCH1/SHH/CTNNB1/ESR1/FOXO3/AKR1C3/PTEN/CCND1/NOTCH1/BAX/KDR/CYP1B1/SIRT1/PSAP/CTNNA1/KIT/PKD1/MMP14/ATM/ADAMTS1/ANG/REN/NTRK1/HSD17B4/SFRP1/RBP4/INSR/SDC1/PDGFA/RARA/ERCC1/BCL2L1/PDGFRB/BCL2L11/HSPA5/BAK1/DHCR24/SERPINF1/NUDT1/AFP/EREG/SRD5A1/PGR/KCNE1	58	BP
GO:0062013	positive regulation of small molecule metabolic process	39/1159	152/18903	9.60664e-15	1.42e-13	5.03899e-14	TNF/IL4/IL1B/NOS2/PTGS2/NOS3/NOS1/PPARG/SRC/GPT/BMP6/MTOR/APOA1/HIF1A/ENO1/NR1D1/PRKAA2/ADCYAP1R1/SIRT1/AKT1/NR1H2/PPARA/PPARGC1A/FABP1/INSR/PARK7/P2RY1/GCG/ARNT/CES1/NR4A3/PRKAA1/FGF1/IRS1/NR1H3/PPARD/GPER1/SNCA/CD74	39	BP
GO:0032642	regulation of chemokine production	31/1159	98/18903	1.02721e-14	1.51e-13	5.37103e-14	TNF/IL4R/TLR4/IL6/IL33/GSTP1/IL1B/TLR2/IL18/NOD2/IL6R/TLR9/IL17F/HMOX1/MIF/TLR3/F2RL1/HMGB1/TNFSF4/CLEC7A/ADAM17/MAVS/ACKR1/HIF1A/RIPK2/CSF1R/EGR1/CXCL6/EPHA2/OAS1/CD74	31	BP
GO:0030879	mammary gland development	37/1159	138/18903	1.02893e-14	1.51e-13	5.37103e-14	NR3C1/ARG1/CSF1/NFKB1/CREB1/XDH/VDR/VEGFA/CEBPB/AR/SRC/PTCH1/MAPK1/JAK2/ESR1/CCND1/CAV1/ORAI1/GPX1/ERBB4/BAX/HIF1A/NRG1/TGFA/AKT1/CSF1R/ATP7A/DDR1/CAPN1/LEF1/BCL2L11/NME1/XBP1/TPH1/EPHA2/RXFP1/PGR	37	BP
GO:0090077	foam cell differentiation	20/1159	39/18903	1.08248e-14	1.59e-13	5.62763e-14	TGFB1/IL18/CSF2/CSF1/PPARG/ITGB3/STAT1/NFKBIA/NFKB1/PLA2G2A/EP300/ABCA1/AGTR1/AGT/SOAT1/NR1H2/PPARA/PRKCH/MSR1/NR1H3	20	BP
GO:0018107	peptidyl-threonine phosphorylation	33/1159	111/18903	1.08328e-14	1.59e-13	5.62763e-14	TGFB1/PRKCA/TGFBR1/MAPK1/MTOR/MAPK8/RIPK2/AKT1/PDPK1/TNKS/ACVR1/PRKCD/PRKDC/CSNK2B/CHEK1/OXSR1/GSK3B/PLK1/IRGM/GCG/WNK1/AXIN1/LRRK2/ROCK2/PRKACA/TBK1/GRK2/SPHK1/ROCK1/S1PR2/CDK1/CALM1/TRPC5	33	BP
GO:0001936	regulation of endothelial cell proliferation	43/1159	183/18903	1.23055e-14	1.8e-13	6.37741e-14	TNF/ALOX5/IL12B/CCL2/CCL24/CCL26/HMOX1/ARG1/JUN/PPARG/ITGB3/STAT1/HMGB1/CXCL12/PRKCA/XDH/FLT1/VEGFA/TGFBR1/BMP6/FGFR1/ADAM17/CAV1/FUT2/ACVRL1/BMP2/HIF1A/KDR/SIRT1/AGTR1/F3/AKT1/PDPK1/AIMP1/TEK/NR4A1/ANG/CDH13/THBS1/ALDH1A2/ARNT/PLCG1/PGF	43	BP
GO:0001952	regulation of cell-matrix adhesion	35/1159	125/18903	1.28701e-14	1.87e-13	6.65409e-14	SMAD3/SERPINE1/CSF1/ITGB3/CCR7/RHOA/VEGFA/SRC/CX3CL1/PTEN/ACVRL1/KDR/CCL21/CDKN2A/BCL6/ABL1/RAC1/MMP14/DLC1/TEK/DDR1/CDH13/THBS1/DAG1/BST1/GSK3B/SFRP1/PTK2/JAG1/PIK3R1/ROCK2/PTK2B/DUSP22/ROCK1/CIB1	35	BP
GO:0009746	response to hexose	45/1159	199/18903	1.34287e-14	1.95e-13	6.92638e-14	TNF/ICAM1/PTGS2/SMAD2/CCN2/RHOA/CASP3/FOXO3/CASR/GPX1/ANO1/HIF1A/NR1D1/PRKAA2/NOX4/ADRA2A/IGF1R/EGR1/RAF1/SMARCA4/OPRK1/NCF1/THBS1/MEN1/SLC26A6/SLC8A1/GCG/PCSK1/KAT5/PIK3CA/PKLR/XBP1/RPS6KB1/HNF4A/PFKL/PRKACA/SERPINF1/OSBP/PTK2B/PRKAA1/TCF7L2/LIN28A/GPR68/PPARD/GPER1	45	BP
GO:0043254	regulation of protein-containing complex assembly	69/1159	410/18903	1.42992e-14	2.07e-13	7.35783e-14	TNF/TGFB1/TLR4/CSF2/CCL24/CCL26/ALOX15/MMP1/HMGB1/CCR7/PARP1/RHOA/MMP3/VEGFA/HSP90AA1/CLEC7A/SRC/ESR1/MTOR/PLCG2/TFRC/TP53/EP300/BAX/ABCA1/CLU/HSPA1A/NRG1/CCL21/P2RY12/CXCL13/HAX1/DKK1/GBA1/NR1H2/ABL1/ASAP1/PRKCD/FNIP1/STUB1/RAF1/RAC1/ATM/HSPA8/BID/GSK3B/IRGM/PARK7/THRA/HDAC6/HES1/BCL2L11/PRUNE1/HSPA5/BAK1/HCK/BIRC2/CDC42/PTK2B/PIEZO1/MAPT/CRBN/IKBKE/MED25/GRB2/ATR/SNCA/PAK3/LCP1	69	BP
GO:0071384	cellular response to corticosteroid stimulus	25/1159	64/18903	1.50968e-14	2.18e-13	7.74984e-14	NR3C1/ARG1/JAK2/FOXO3/AKR1C3/SCNN1A/CYP1B1/ACVR1/IGF1R/CFLAR/SMYD3/SCNN1G/AQP1/EIF4E/CASP9/SCNN1B/SGK1/BCL2L11/SSTR5/RPS6KB1/SERPINF1/UGT1A1/BMI1/SRD5A1/GPER1	25	BP
GO:0045598	regulation of fat cell differentiation	38/1159	147/18903	1.62873e-14	2.35e-13	8.34121e-14	TNF/ALOX5/TGFB1/IL6/PTGS2/SMAD3/PPARG/CREB1/MAPK14/CEBPB/SOD2/RORA/ENPP1/RORC/DDIT3/BMP2/NR1D1/SIRT1/AKT1/CEBPA/DUSP10/SIX1/SFRP1/JAG1/HDAC6/HES1/AXIN1/XBP1/TPH1/STK4/E2F1/SORT1/CMKLR1/PIM1/YAP1/PPARD/GPER1/FFAR4	38	BP
GO:0010632	regulation of epithelial cell migration	56/1159	292/18903	1.65687e-14	2.39e-13	8.46533e-14	TNF/IL4/TGFB1/PTGS2/NOS3/HMOX1/NFE2L2/JUN/PPARG/ITGB3/HMGB1/TACR1/ANGPT1/PRKCA/RHOA/VEGFA/SRC/FGFR1/MTOR/ADAM17/PLCG2/PTEN/ACVRL1/NOTCH1/HSPB1/HIF1A/KDR/SIRT1/AKT1/HYAL1/PDPK1/CXCL13/DOCK1/AGT/DUSP10/PIK3C2A/ABL1/CSNK2B/RAC1/TEK/HBEGF/THBS1/PTK2/BMPER/HDAC6/FOXC2/ADIPOR1/EPHA2/ROCK2/SERPINF1/FGF4/PTK2B/SCARB1/FGF1/PLCG1/CIB1	56	BP
GO:0002705	positive regulation of leukocyte mediated immunity	37/1159	140/18903	1.6915e-14	2.43e-13	8.62193e-14	TNF/IL12B/IL4/TGFB1/IL6/IL1B/IL18/LTA/NOS2/NOD2/IL1R1/ITGB2/NLRP3/ARG1/C3/IL12RB1/F2RL1/ITGAM/TNFSF4/BTK/CLEC7A/PLCG2/MAVS/TRAF6/TFRC/HSPD1/MALT1/DDX1/PTPRC/KIT/MAP3K7/TP53BP1/CD81/RASGRP1/KLRK1/HLA-DRB3/TNFSF13	37	BP
GO:0061458	reproductive system development	58/1159	310/18903	1.74071e-14	2.49e-13	8.85196e-14	TLR9/IL1A/NOS3/C3/TLR3/MMP2/VEGFA/CASP3/CEBPB/AR/SRC/TGFBR1/SOD1/BMP6/PTCH1/SHH/CTNNB1/ESR1/FOXO3/AKR1C3/PTEN/CCND1/NOTCH1/BAX/KDR/CYP1B1/SIRT1/PSAP/CTNNA1/KIT/PKD1/MMP14/ATM/ADAMTS1/ANG/REN/NTRK1/HSD17B4/SFRP1/RBP4/INSR/SDC1/PDGFA/RARA/ERCC1/BCL2L1/PDGFRB/BCL2L11/HSPA5/BAK1/DHCR24/SERPINF1/NUDT1/AFP/EREG/SRD5A1/PGR/KCNE1	58	BP
GO:0033157	regulation of intracellular protein transport	48/1159	225/18903	1.91591e-14	2.74e-13	9.72009e-14	TGFB1/IL1B/PTGS2/SMAD3/ITGB2/ITGAM/ANGPT1/CDH1/MAPK14/CHRM1/GZMB/HSP90AA1/FYN/JAK2/SHH/MAVS/RAC2/ERBB2/MAPK8/RAPGEF3/HAX1/PRKCD/FLNA/HDAC3/GSK3B/BAG3/PARK7/LMAN1/PIK3R1/HSPA1L/CD81/RAN/XPO1/HUWE1/SFN/LRRK2/RNF31/PRKACA/PRKAA1/TCF7L2/NMT1/KIF20B/PTPN1/HRAS/CDK1/KCNE1/CIB1/LCP1	48	BP
GO:0006939	smooth muscle contraction	33/1159	113/18903	1.92549e-14	2.75e-13	9.74582e-14	ADRB2/PTGS2/EDNRA/CHRM3/TRPV1/TACR1/ADORA1/RHOA/F2R/CD38/SOD1/PRKG1/CALCA/CAV1/EDNRB/NMUR2/AGT/KIT/PIK3C2A/ADRA2A/NMUR1/P2RX1/SLC8A1/SCNN1B/KCNMA1/DRD2/ADRA1A/ROCK2/DRD1/SPHK1/ROCK1/GPER1/ADRA2C	33	BP
GO:0016485	protein processing	51/1159	250/18903	1.94265e-14	2.76e-13	9.80977e-14	PLA2G7/SERPINE1/CASP8/DPP4/MME/PARP1/ACE2/CASP3/SRC/CASP1/PTCH1/GGT1/CPN1/SHH/THBD/ADAM17/RUNX1/GAS1/ENO1/CTSS/VSIR/XIAP/ANXA2/RIPK2/F3/FGG/ZMPSTE24/MMP14/ECE1/CASP4/REN/PGK1/THBS1/PITRM1/MMEL1/CASP9/PCSK1/KLK1/CAPN2/LRRK2/BAK1/DHCR24/PRKACA/PRKACB/BCHE/GRIN2A/PCSK9/PSEN2/CASP7/F12/HM13	51	BP
GO:0002821	positive regulation of adaptive immune response	34/1159	120/18903	2.0911e-14	2.96e-13	1.05104e-13	TNF/IL12B/IL4/TGFB1/IL6/IL1B/IL18/LTA/NOD2/IL1R1/NLRP3/C3/IL12RB1/SLC11A1/TNFSF4/CCR2/BTK/TNFSF13B/CLEC7A/JAK2/TRAF6/TFRC/HSPD1/PRKCQ/SIRT1/MALT1/RIPK2/CD274/PTPRC/MAP3K7/TP53BP1/CD81/HLA-DRB3/TNFSF13	34	BP
GO:0042752	regulation of circadian rhythm	34/1159	120/18903	2.0911e-14	2.96e-13	1.05104e-13	CSF2/PPARG/ADORA1/PARP1/RORA/MTOR/RORC/TP53/MAPK8/NR1D1/PRKAA2/ADRB1/CRY1/CRY2/PRKDC/PPARA/HDAC3/ATG7/MAPK10/PPARGC1A/GSK3B/KAT5/PHLPP1/DRD2/HNF4A/ROCK2/ADCY1/PRKAA1/DRD3/SUV39H1/NR1H3/RORB/CDK1/KLF10	34	BP
GO:0038083	peptidyl-tyrosine autophosphorylation	15/1159	21/18903	2.28271e-14	3.23e-13	1.14469e-13	EGFR/BTK/MAPK3/VEGFA/LCK/SRC/CAV1/KDR/ABL1/IGF1R/DDR1/NTRK1/INSR/LTK/PTK2B	15	BP
GO:0002824	positive regulation of adaptive immune response based on somatic recombination of immune receptors built from immunoglobulin superfamily domains	33/1159	114/18903	2.55312e-14	3.6e-13	1.27734e-13	TNF/IL12B/IL4/TGFB1/IL6/IL1B/IL18/LTA/NOD2/IL1R1/NLRP3/C3/IL12RB1/SLC11A1/TNFSF4/CCR2/BTK/TNFSF13B/CLEC7A/JAK2/TRAF6/TFRC/HSPD1/PRKCQ/MALT1/RIPK2/CD274/PTPRC/MAP3K7/TP53BP1/CD81/HLA-DRB3/TNFSF13	33	BP
GO:0031295	T cell costimulation	21/1159	45/18903	2.65494e-14	3.73e-13	1.32521e-13	CD86/CD80/LYN/TNFSF4/DPP4/CCR7/LCK/TNFSF13B/FYN/SRC/CCL19/CAV1/CCL21/AKT1/LGALS1/CD274/PDCD1LG2/PTPN6/CD81/PIK3CA/KLRK1	21	BP
GO:0038061	NIK/NF-kappaB signaling	37/1159	142/18903	2.75258e-14	3.86e-13	1.37079e-13	TNF/IL12B/CD14/TLR4/IL1B/TLR2/IL18/NOD2/TLR9/NOD1/NLRP3/CD86/TLR3/NFKBIA/EGFR/RHOA/MMP8/CHUK/IRAK1/CCL19/TRAF6/NFKB2/EP300/NR3C2/BIRC3/MALT1/AKT1/TNFRSF10A/RELA/MAP3K7/PHB1/PRDX1/ADIPOR1/BIRC2/IKBKE/ILK/SPHK1	37	BP
GO:0002548	monocyte chemotaxis	26/1159	71/18903	2.78554e-14	3.9e-13	1.38403e-13	PLA2G7/CCL5/IL6/CCL2/CCL17/CCL24/CCL26/IL6R/SERPINE1/CCL22/CXCL10/CX3CR1/HMGB1/LYN/CCR2/CXCL12/DUSP1/FLT1/CCR1/CCL19/CX3CL1/CALCA/CCL20/FPR2/CCL21/CCL15	26	BP
GO:0009306	protein secretion	63/1159	359/18903	2.85879e-14	3.99e-13	1.41717e-13	TNF/ALOX5/IL12B/TGFB1/CCL5/TLR4/IL6/IL1B/TLR2/NOS2/IL1RN/IL1A/SMAD2/PPARG/F2RL1/F2R/CD38/OPRM1/KCNJ11/BMP6/JAK2/ABCC8/CASR/ANO1/MC4R/ABCA1/HIF1A/NR1D1/EDNRB/FGG/NR1H2/ADRA2A/RAF1/ANG/CNR1/TRPM2/SLC12A2/ACHE/HMGCR/SFRP1/RBP4/PARK7/GCG/PCSK1/PFKM/DRD2/SLC16A1/AP1B1/SSTR5/HNF4A/PFKL/OSBP/TCF7L2/DRD3/PPIA/GPR68/SUCNR1/DNM1L/IRS1/NR1H3/PPARD/GPER1/FFAR1	63	BP
GO:1903034	regulation of response to wounding	41/1159	172/18903	3.02594e-14	4.22e-13	1.49661e-13	TNF/ALOX5/SMAD3/NOS3/SERPINE1/NFE2L2/F2RL1/CXCR4/ITGB1/F2R/CLEC7A/PRKG1/THBD/MTOR/SPP1/ABCC8/PTEN/CAV1/ANXA2/F3/FGG/F2/ATP7A/ADRA2A/PRKCD/IGF1R/FLNA/DUOX1/HBEGF/THBS1/SLC12A2/MAP2K1/PTK2/PDGFA/PRDX2/FOXC2/XBP1/MAP2K2/HRAS/F12/HPSE	41	BP
GO:0090316	positive regulation of intracellular protein transport	39/1159	157/18903	3.03698e-14	4.22e-13	1.49865e-13	TGFB1/IL1B/PTGS2/SMAD3/ITGB2/ITGAM/CDH1/MAPK14/CHRM1/GZMB/HSP90AA1/FYN/JAK2/SHH/MAVS/RAC2/ERBB2/MAPK8/RAPGEF3/PRKCD/FLNA/HDAC3/GSK3B/BAG3/PIK3R1/HSPA1L/CD81/RAN/HUWE1/SFN/RNF31/PRKACA/PRKAA1/TCF7L2/NMT1/KIF20B/HRAS/CDK1/CIB1	39	BP
GO:0033138	positive regulation of peptidyl-serine phosphorylation	32/1159	108/18903	3.04654e-14	4.23e-13	1.49995e-13	TNF/TGFB1/IL6/PTGS2/NOS1/MIF/EGFR/ANGPT1/VEGFA/HSP90AA1/TFRC/CAV1/RAPGEF3/CD44/RIPK2/AKT1/HAX1/FNIP1/RAF1/SMYD3/IFNA2/IRGM/PARK7/GCG/HDAC6/PIK3CA/AXIN1/IFNA6/STK4/TBK1/ARAF/SNCA	32	BP
GO:0031279	regulation of cyclase activity	27/1159	77/18903	3.08236e-14	4.27e-13	1.51414e-13	ADRB2/NOS2/NOS3/NOS1/EDNRA/CRHR1/CCR2/MAPK14/MAPK3/LTB4R2/ADORA3/CALCA/ORAI1/MAPK8/ADRB1/EDNRB/CACNA1C/GLP1R/RAF1/DRD2/GALR1/AVPR2/DRD1/DRD3/GABBR1/RXFP1/CALM1	27	BP
GO:0035592	establishment of protein localization to extracellular region	63/1159	360/18903	3.2649e-14	4.51e-13	1.60018e-13	TNF/ALOX5/IL12B/TGFB1/CCL5/TLR4/IL6/IL1B/TLR2/NOS2/IL1RN/IL1A/SMAD2/PPARG/F2RL1/F2R/CD38/OPRM1/KCNJ11/BMP6/JAK2/ABCC8/CASR/ANO1/MC4R/ABCA1/HIF1A/NR1D1/EDNRB/FGG/NR1H2/ADRA2A/RAF1/ANG/CNR1/TRPM2/SLC12A2/ACHE/HMGCR/SFRP1/RBP4/PARK7/GCG/PCSK1/PFKM/DRD2/SLC16A1/AP1B1/SSTR5/HNF4A/PFKL/OSBP/TCF7L2/DRD3/PPIA/GPR68/SUCNR1/DNM1L/IRS1/NR1H3/PPARD/GPER1/FFAR1	63	BP
GO:0033559	unsaturated fatty acid metabolic process	33/1159	115/18903	3.3734e-14	4.65e-13	1.64963e-13	ALOX5/GSTM1/GSTP1/IL1B/PTGS2/ALOX15/PTGS1/MIF/EPHX1/CYP1A2/TNFRSF1A/CYP1A1/GSTA1/AKR1C3/GPX1/PTGES/GPX4/CYP1B1/SIRT1/CYP2C9/AKR1B1/CYP2C8/TBXAS1/FADS1/CYP4F2/ELOVL1/CBR1/ATP6V1B1/CES2/MGLL/HPGD/CD74/AKR1C1	33	BP
GO:0002833	positive regulation of response to biotic stimulus	43/1159	188/18903	3.39971e-14	4.67e-13	1.65875e-13	IL12B/CCL5/CD14/TLR4/NOD2/TLR9/MBL2/IL17F/ARG1/MIF/CREBBP/F2RL1/HMGB1/LYN/PRKCA/HSP90AA1/FYN/CLEC7A/SRC/BMP6/PLCG2/MAVS/IKBKB/TRAF6/EP300/FPR2/HSPD1/CD274/LY96/MAP3K7/PRKDC/USP15/IRGM/RASGRP1/HCK/TBK1/CGAS/KLRK1/IKBKE/HEXIM1/HLA-DRB3/EREG/PAK3	43	BP
GO:0007548	sex differentiation	55/1159	288/18903	3.43097e-14	4.71e-13	1.67024e-13	TLR9/IL1A/NOS3/TLR3/MMP2/VEGFA/CASP3/CEBPB/AR/SRC/TGFBR1/SOD1/BMP6/SHH/CTNNB1/ESR1/FOXO3/AKR1C3/CCND1/BAX/KDR/ADCYAP1R1/CYP1B1/SIRT1/CTNNA1/KIT/PKD1/MMP14/ATM/ADAMTS1/ANG/REN/NTRK1/HSD17B4/SFRP1/RBP4/INSR/SDC1/PDGFA/RARA/ERCC1/BCL2L1/PDGFRB/CYP17A1/BCL2L11/HSPA5/BAK1/HNF4A/DHCR24/NUDT1/AFP/EREG/SRD5A1/PGR/KCNE1	55	BP
GO:0010517	regulation of phospholipase activity	25/1159	66/18903	3.50689e-14	4.8e-13	1.70337e-13	CCL5/CD86/EDNRA/C5AR1/SELE/EGFR/FLT1/FGFR1/ESR1/LRP1/ADCYAP1R1/P2RY12/AGTR1/PDPK1/AGT/KIT/ABL1/NMUR1/PHB1/ANG/PDGFRB/ADRA1A/PPT1/HRAS/SNCA	25	BP
GO:0046330	positive regulation of JNK cascade	30/1159	96/18903	3.98788e-14	5.45e-13	1.93266e-13	TNF/TLR4/IL1B/NOD2/TLR9/IL1A/NOD1/TLR3/F2RL1/HMGB1/CCR7/CCN2/MMP8/CCL19/TRAF6/CCL21/XIAP/RIPK2/MAP3K5/PLCB1/NOX1/NCF1/RASGRP1/RIPK1/AXIN1/PTK2B/MAP2K4/DUSP22/HRAS/TAOK1	30	BP
GO:0050804	modulation of chemical synaptic transmission	72/1159	448/18903	4.22289e-14	5.75e-13	2.04199e-13	ADRB2/TNF/IL1B/CCL2/PTGS2/CX3CR1/CCR2/TACR1/CDH1/ADORA1/ITGB1/MME/CD38/FYN/SRC/ATP2A2/MAPK1/CX3CL1/JAK2/PTEN/YTHDF1/DKK1/AGT/KIT/ABL1/ADRA2A/PLCB1/DVL1/CNR2/GRM1/EIF4E/NTRK1/CNR1/SLC12A2/ACHE/GSK3B/P2RX1/P2RY1/GRM5/ASIC1/RARA/KMT2A/SEPTIN5/DRD2/YWHAG/LRRK2/ADRA1A/SLC7A11/KRAS/CA2/SQSTM1/PRKACA/KIF5B/ARF1/DRD1/FLOT1/BCHE/PTK2B/ADCY1/GRIN2A/DNM1/MAPT/EPHB1/GRIK1/DRD3/S1PR2/GRIA1/GABBR1/GPER1/HRAS/S…	72	BP
GO:0006631	fatty acid metabolic process	67/1159	400/18903	4.40158e-14	5.98e-13	2.12366e-13	ALOX5/GSTM1/GSTP1/IL1B/PTGS2/ALOX15/PTGS1/MIF/C3/PPARG/EPHX1/CYP3A4/MAPK14/CYP1A2/TNFRSF1A/GGT1/CYP1A1/GSTA1/AKR1C3/ADH5/CAV1/APOA1/GPX1/ABHD5/PTGES/GPX4/PRKAA2/CYP1B1/SIRT1/CYP2C9/AKT1/AKR1B1/NR1H2/PPARA/CYP2C8/CNR1/PPARGC1A/HSD17B4/TBXAS1/FABP1/FADS1/CYP4F2/ELOVL1/HAO1/TYRP1/BRCA1/CBR1/XBP1/ADIPOR1/ATP6V1B1/CES1/PEX2/CES2/NR4A3/ACACA/PRKAA1/MGLL/BDH2/PLA2G15/HPGD/SLC27A1/IRS1/NR1H3/PPARD/SNCA/C…	67	BP
GO:0043542	endothelial cell migration	54/1159	281/18903	4.49458e-14	6.1e-13	2.16371e-13	TNF/TGFB1/PTGS2/NOS3/HMOX1/NFE2L2/PPARG/ITGB3/HMGB1/ANGPT1/DPP4/PRKCA/ITGB1/RHOA/VEGFA/TGFBR1/FGFR1/ADAM17/PTEN/APOA1/GPX1/ACVRL1/NOTCH1/HSPB1/HIF1A/KDR/CYP1B1/SIRT1/AKT1/PDPK1/CXCL13/AGT/PIK3C2A/ABL1/CSNK2B/RAC1/TEK/NR4A1/CDH13/THBS1/PTK2/BMPER/FOXC2/PIK3CA/EPHA2/ROCK2/SERPINF1/FGF4/PTK2B/LGALS8/SCARB1/FGF1/PLCG1/CIB1	54	BP
GO:0010506	regulation of autophagy	61/1159	344/18903	4.5597e-14	6.17e-13	2.19019e-13	ADRB2/IL4/NOD2/TLR9/NOD1/HMOX1/HMGB1/MAPK3/CASP3/MTOR/FOXO3/TP53/EP300/DDIT3/HSPB1/HIF1A/MAPK8/KDR/PRKAA2/SIRT1/RIPK2/AKT1/ITPR1/BECN1/PSAP/HAX1/GBA1/PIK3C2A/ABL1/ZMPSTE24/IKBKG/MAP3K7/VDAC1/ATM/GSK3B/BAG3/IRGM/PARK7/SPTLC1/CAPN1/HDAC6/KAT5/BCL2L11/PIK3CA/LRRK2/ADRA1A/ATP6V1B1/RNF31/PRKACA/NPC1/TBK1/EEF1A1/MAPT/PRKAA1/PIP4K2A/SLC7A5/ROCK1/DNM1L/MCL1/SNCA/KEAP1	61	BP
GO:0002790	peptide secretion	48/1159	230/18903	4.6361e-14	6.26e-13	2.22196e-13	TNF/ALOX5/CCL5/IL6/IL1B/NOS2/IL1RN/SMAD2/TRPV1/CRHR1/ADORA1/CD38/KCNJ11/JAK2/ABCC8/CASR/ANO1/MC4R/ABCA1/HIF1A/NR1D1/FGG/AIMP1/ADRA2A/RAF1/AQP1/CNR1/TRPM2/SFRP1/RBP4/PARK7/GCG/PFKM/DRD2/SLC16A1/SSTR5/HNF4A/PFKL/OSBP/TCF7L2/GPR68/GABBR1/IRS1/PPARD/GPER1/FFAR4/CD74/FFAR1	48	BP
GO:0022612	gland morphogenesis	34/1159	123/18903	4.65962e-14	6.28e-13	2.2283e-13	TNF/TGFB1/IL6/NR3C1/ARG1/CSF1/NFKB1/EGFR/MMP2/VDR/CEBPB/AR/SRC/PTCH1/SHH/ESR1/CAV1/NOTCH1/BAX/TGFA/CSF1R/RPS6KA1/CFLAR/DDR1/DAG1/LAMA1/SFRP1/PDGFA/CAPN1/XBP1/EPHA2/FGF1/RXFP1/PGR	34	BP
GO:0099177	regulation of trans-synaptic signaling	72/1159	449/18903	4.73915e-14	6.37e-13	2.26134e-13	ADRB2/TNF/IL1B/CCL2/PTGS2/CX3CR1/CCR2/TACR1/CDH1/ADORA1/ITGB1/MME/CD38/FYN/SRC/ATP2A2/MAPK1/CX3CL1/JAK2/PTEN/YTHDF1/DKK1/AGT/KIT/ABL1/ADRA2A/PLCB1/DVL1/CNR2/GRM1/EIF4E/NTRK1/CNR1/SLC12A2/ACHE/GSK3B/P2RX1/P2RY1/GRM5/ASIC1/RARA/KMT2A/SEPTIN5/DRD2/YWHAG/LRRK2/ADRA1A/SLC7A11/KRAS/CA2/SQSTM1/PRKACA/KIF5B/ARF1/DRD1/FLOT1/BCHE/PTK2B/ADCY1/GRIN2A/DNM1/MAPT/EPHB1/GRIK1/DRD3/S1PR2/GRIA1/GABBR1/GPER1/HRAS/S…	72	BP
GO:0051051	negative regulation of transport	75/1159	479/18903	4.93797e-14	6.62e-13	2.35103e-13	TNF/IL12B/IL1B/TLR2/PTGS2/TLR9/NOS3/NOS1/HMOX1/ITGB3/CRHR1/HMGB1/CCR2/NFKB1/ANGPT1/ADORA1/F2R/OPRM1/HRH3/KCNJ11/TNFRSF1A/ENPP1/SHH/ABCC8/PTEN/CAV1/NOTCH1/GSTO1/FBXO11/NRG1/ANXA2/AKT1/GJA1/CRY1/CRY2/NR1H2/ATP7A/ADRA2A/VDAC1/RAC1/MAOB/OPRK1/OXSR1/CNR1/THBS1/HMGCR/BAG3/SFRP1/PARK7/P2RY1/ASIC1/LMAN1/CYP4F2/WNK1/HES1/VPS4B/DRD2/LRRK2/AVPR2/PFKL/PTK2B/PCSK9/CRBN/PICALM/DRD3/GABBR1/IRS1/NR1H3/FFAR4/SNCA…	75	BP
GO:0030183	B cell differentiation	38/1159	152/18903	5.20877e-14	6.97e-13	2.47453e-13	IL4/IL6/VCAM1/TLR9/ITGB1/BTK/TNFSF13B/ADAM17/PLCG2/JAK3/TP53/EP300/BAX/MS4A1/MALT1/LGALS1/BCL6/PTPRC/KIT/ABL1/CR1/FNIP1/PRKDC/MMP14/ATM/IFNA2/NTRK1/SFRP1/PTPN6/PIK3R1/TRAF3IP2/IFNA6/XBP1/BAK1/PTK2B/INPP5D/TOP2B/DCAF1	38	BP
GO:0045582	positive regulation of T cell differentiation	33/1159	117/18903	5.82881e-14	7.79e-13	2.76303e-13	IL12B/IL4R/IL4/IL18/NLRP3/CD86/IL12RB1/CD80/TNFSF4/RHOA/CCL19/SHH/FOXO3/RUNX1/VSIR/MALT1/RIPK2/BCL6/PTPRC/DUSP10/CR1/VNN1/SMARCA4/IL1RL2/ACTB/SMARCD2/BRD7/RARA/RASGRP1/LEF1/KAT5/XBP1/CD74	33	BP
GO:0071677	positive regulation of mononuclear cell migration	26/1159	73/18903	6.01313e-14	8.01e-13	2.84418e-13	TNF/IL4/PLA2G7/CCL5/SERPINE1/CXCL10/CSF1/CX3CR1/ITGB3/HMGB1/CCR2/CXCL12/CCR6/CCR7/RHOA/CCR1/CCL20/ADAM17/FPR2/CCL21/CXCL13/ABL1/OXSR1/WNK1/PTK2B/MADCAM1	26	BP
GO:0072676	lymphocyte migration	34/1159	124/18903	6.04834e-14	8.04e-13	2.8546e-13	CCL5/ICAM1/CCL2/CCL17/CCL24/CCL26/CCL22/CXCL10/ITGAL/ITGB3/CCR2/CXCL12/CCR6/CCR7/RHOA/CCL19/CX3CL1/CCL20/ADAM17/CCL21/AKT1/S1PR1/CXCL13/GBA1/CCL15/ABL1/CXCL11/OXSR1/PLEC/SLC12A2/WNK1/PTK2B/KLRK1/MADCAM1	34	BP
GO:1902882	regulation of response to oxidative stress	31/1159	104/18903	6.40447e-14	8.5e-13	3.01611e-13	TNF/ALOX5/TLR4/NFE2L2/PARP1/MMP3/FYN/SOD2/SOD1/CTNNB1/FOXO3/GPX1/HSPB1/HIF1A/SIRT1/AKT1/ABL1/VNN1/NOX1/TRPM2/PARK7/HDAC6/RIPK1/LRRK2/SLC7A11/PYCR1/NR4A3/TRAP1/PPIA/MCL1/GPR37	31	BP
GO:0010634	positive regulation of epithelial cell migration	41/1159	176/18903	6.95789e-14	9.21e-13	3.26963e-13	TGFB1/PTGS2/NOS3/HMOX1/NFE2L2/JUN/ITGB3/HMGB1/TACR1/ANGPT1/PRKCA/VEGFA/SRC/FGFR1/MTOR/ADAM17/PLCG2/HSPB1/HIF1A/KDR/SIRT1/AKT1/HYAL1/PDPK1/DOCK1/AGT/PIK3C2A/ABL1/RAC1/TEK/HBEGF/THBS1/PTK2/HDAC6/FOXC2/ROCK2/PTK2B/SCARB1/FGF1/PLCG1/CIB1	41	BP
GO:0006869	lipid transport	70/1159	433/18903	7.15833e-14	9.46e-13	3.35654e-13	IL1B/NOS2/PTGS2/IL1A/MIF/PPARG/ITGB3/CRHR1/NFKBIA/NFKB1/ABCB1/PON1/PLA2G2A/BMP6/PTCH1/SHH/SPP1/ABCC1/CAV1/APOA1/ABCA1/PTGES/LRP1/CLU/ANXA2/SIRT1/AGTR1/AKT1/PSAP/NMUR2/CRY1/CRY2/AGT/SOAT1/NR1H2/PRKCD/ESYT1/KCNQ1/SLC2A1/PPARA/SLCO1B1/REN/FABP4/THBS1/RBP4/FABP1/CYP4F2/ABCG2/VPS4B/DRD2/GALR1/RPS6KB1/NPC1/CES1/SIGMAR1/ATP8B1/OSBP/PCSK9/SCARB1/PRKAA1/DRD3/PIP4K2A/SLCO1A2/SLC27A1/MSR1/NR1H3/PPARD/ABCC2/…	70	BP
GO:0006469	negative regulation of protein kinase activity	46/1159	216/18903	7.19856e-14	9.49e-13	3.36811e-13	IRAK3/GSTP1/IL1B/PPARG/LYN/DUSP1/CASP3/NPPA/PTEN/CAV1/BMP2/HSPB1/SIRT1/AKT1/CDKN2A/CEBPA/PDPK1/AGT/PTPRC/GBA1/DUSP10/ABL1/PRKCD/DVL1/APC/SMYD3/FABP4/PLEC/CDKN1A/MEN1/PLK1/HMGCR/SFRP1/SLC8A1/PARK7/PTPN6/YWHAG/SFN/DNAJA1/IPO7/AKT1S1/DUSP22/HEXIM1/PPIA/PTPN1/SNCA	46	BP
GO:0002286	T cell activation involved in immune response	33/1159	118/18903	7.62354e-14	1e-12	3.55161e-13	IL12B/IL4R/IL4/IL6/IL18/ICAM1/IL6R/NLRP3/CD86/ITGAL/IL12RB1/CD80/F2RL1/SLC11A1/HMGB1/TNFSF4/CCL19/RORA/MTOR/RORC/JAK3/TP53/MALT1/RIPK2/BCL6/ATP7A/IFNA2/RARA/CD81/LEF1/IFNA6/CD74/LCP1	33	BP
GO:0006805	xenobiotic metabolic process	33/1159	118/18903	7.62354e-14	1e-12	3.55161e-13	GSTM1/GSTP1/NOS1/EPHX1/NQO1/ABCB1/CYP3A4/AHR/CYP1A2/RORA/CYP1A1/GSTA1/RORC/ABCC1/NAT1/GSTO1/SULT1A1/CYP1B1/CYP2C9/UGT1A6/CYP26A1/NR1I2/SLCO1B1/CYP2C8/CYP4F2/CBR1/HNF4A/CES2/UGT1A1/BCHE/ABCC2/AKR1C1/AOX1	33	BP
GO:0006801	superoxide metabolic process	26/1159	74/18903	8.73552e-14	1.14e-12	4.06092e-13	TGFB1/GSTP1/NOS2/NOS3/ITGB2/NFE2L2/NQO1/F2RL1/ITGAM/CLEC7A/SOD2/SOD1/CYBB/FPR2/CBS/AGT/NOX4/ATP7A/PRKCD/NOX1/DUOX1/NCF1/BST1/PRDX1/PRDX2/MAPT	26	BP
GO:0071692	protein localization to extracellular region	63/1159	368/18903	9.25317e-14	1.21e-12	4.29235e-13	TNF/ALOX5/IL12B/TGFB1/CCL5/TLR4/IL6/IL1B/TLR2/NOS2/IL1RN/IL1A/SMAD2/PPARG/F2RL1/F2R/CD38/OPRM1/KCNJ11/BMP6/JAK2/ABCC8/CASR/ANO1/MC4R/ABCA1/HIF1A/NR1D1/EDNRB/FGG/NR1H2/ADRA2A/RAF1/ANG/CNR1/TRPM2/SLC12A2/ACHE/HMGCR/SFRP1/RBP4/PARK7/GCG/PCSK1/PFKM/DRD2/SLC16A1/AP1B1/SSTR5/HNF4A/PFKL/OSBP/TCF7L2/DRD3/PPIA/GPR68/SUCNR1/DNM1L/IRS1/NR1H3/PPARD/GPER1/FFAR1	63	BP
GO:0030168	platelet activation	35/1159	133/18903	9.94412e-14	1.3e-12	4.60302e-13	TLR4/IL6/NOS3/ITGB3/LYN/PRKCA/MAPK14/F2R/LCK/SRC/PRKG1/JAK2/THBD/PLCG2/HSPB1/PRKCQ/P2RY12/FGG/F2/ADRA2A/PRKCD/FLNA/ACTB/P2RX1/PDGFA/P2RY1/PTPN6/PIK3CA/SLC7A11/ENTPD2/PDPN/ILK/PPIA/CSRP1/ADRA2C	35	BP
GO:0043279	response to alkaloid	30/1159	99/18903	9.98535e-14	1.3e-12	4.61224e-13	NQO1/TRPV1/HDAC2/TACR1/CXCR4/HSP90AA1/CASP3/OPRM1/CHEK1/PPP5C/OPRK1/CNR1/SLC34A1/FOSB/SLC8A1/RYR1/PCSK1/BCL2L1/CCNA2/HES1/DRD2/HSPA5/DRD1/BCHE/PTK2B/RAD51/PRKAA1/DRD3/CASP7/MAP1LC3A	30	BP
GO:2000106	regulation of leukocyte apoptotic process	29/1159	93/18903	1.12837e-13	1.47e-12	5.20084e-13	CCL5/NOD2/MIF/LYN/CXCR2/CXCL12/IDO1/BTK/CCR7/CCL19/ADAM17/PDCD1/JAK3/PTEN/TP53/BAX/HIF1A/CCL21/PRKCQ/SIRT1/CDKN2A/CD274/BCL6/FNIP1/BCL2L1/BCL2L11/SLC7A11/ST6GAL1/CD74	29	BP
GO:0042102	positive regulation of T cell proliferation	31/1159	106/18903	1.14011e-13	1.48e-12	5.24382e-13	IL12B/IL4/CCL5/IL6/IL1B/IL18/VCAM1/IL1A/CD86/IL12RB1/CD80/HMGB1/TNFSF4/CCR2/TNFSF13B/CCL19/JAK2/SHH/JAK3/TRAF6/TFRC/CD209/ICOSLG/PRKCQ/RIPK2/CD274/PTPRC/PDCD1LG2/CD81/HES1/BMI1	31	BP
GO:0001889	liver development	36/1159	141/18903	1.20528e-13	1.56e-12	5.52011e-13	TNF/IL6/SMAD3/HMOX1/ARG1/JUN/CEBPB/SOD2/PTCH1/CYP1A1/CCND1/NOTCH1/TGFA/CEBPA/UGT1A6/RPS6KA1/RELA/ATP7A/ZMPSTE24/CFLAR/PKD1/ALDH1A2/RARA/HES1/PTCD2/PIK3CA/XBP1/HNF4A/UPB1/AURKA/UGT1A1/PCSK9/SLC7A5/ELK1/FGF1/SRD5A1	36	BP
GO:0034754	cellular hormone metabolic process	36/1159	141/18903	1.20528e-13	1.56e-12	5.52011e-13	CYP3A4/CYP1A2/BMP6/SHH/ESR1/CYP1A1/SPP1/AKR1C3/BMP2/EDNRB/SULT1A1/CYP1B1/CYP2C9/AKR1B1/EGR1/CYP26A1/ECE1/CYP2C8/HSD3B1/ADH1C/HSD17B4/RBP4/ALDH1A2/SCNN1B/CYP21A2/ADH1B/CYP17A1/CACNA1H/DGAT1/UGT1A1/PNPLA2/HSD17B1/AFP/TTR/SRD5A1/AKR1C1	36	BP
GO:0070498	interleukin-1-mediated signaling pathway	17/1159	30/18903	1.22157e-13	1.57e-12	5.58294e-13	IRAK3/IL6/IL1B/IL1RN/IL1R1/MAPK3/IRAK1/IKBKB/TRAF6/IRAK4/RELA/PLCB1/MAP3K7/EGR1/IL1RL2/RPS6KA5/IRAK2	17	BP
GO:0018210	peptidyl-threonine modification	33/1159	120/18903	1.29151e-13	1.65e-12	5.87303e-13	TGFB1/PRKCA/TGFBR1/MAPK1/MTOR/MAPK8/RIPK2/AKT1/PDPK1/TNKS/ACVR1/PRKCD/PRKDC/CSNK2B/CHEK1/OXSR1/GSK3B/PLK1/IRGM/GCG/WNK1/AXIN1/LRRK2/ROCK2/PRKACA/TBK1/GRK2/SPHK1/ROCK1/S1PR2/CDK1/CALM1/TRPC5	33	BP
GO:0048146	positive regulation of fibroblast proliferation	22/1159	53/18903	1.29318e-13	1.65e-12	5.87303e-13	MIF/JUN/ITGB3/EGFR/LIG4/ESR1/MYC/AGT/ABL1/AQP1/CDKN1A/PDGFA/PDGFRB/CCNA2/CDK4/E2F1/CD248/BMI1/EREG/SPHK1/HRAS/CD74	22	BP
GO:0071622	regulation of granulocyte chemotaxis	22/1159	53/18903	1.29318e-13	1.65e-12	5.87303e-13	IL4/CXCL8/CCL5/NOD2/C5AR1/CSF1/CXCR2/DPP4/CCR7/MAPK3/CCL19/MAPK1/RAC2/CCL21/CSF1R/RAC1/THBS1/BST1/PTK2/CMKLR1/DNM1L/CD74	22	BP
GO:0007265	Ras protein signal transduction	61/1159	353/18903	1.50325e-13	1.92e-12	6.81279e-13	CSF1/JUN/F2RL1/ITGB1/RHOA/F2R/SRC/GNB1/TP53/RAC2/APOA1/NOTCH1/CDK2/ABCA1/CFL1/RAPGEF3/NRG1/LAT/AGTR1/CDKN2A/ARRB1/BCL6/COL1A2/ABL1/ADRA2A/RAF1/RAC1/DLC1/CDH13/NTRK1/CDKN1A/KPNB1/PARK7/SETDB1/SOS1/PDGFRB/CCNA2/RASGRP1/DNMT1/RASA2/PLD1/ADRA1A/KRAS/DHCR24/SQSTM1/ROCK2/CDC42/LIMK1/FLOT1/PSD/ARHGEF1/FBP1/ARFGAP1/CNKSR1/CYTH3/PDPN/ROCK1/GRB2/HRAS/ARHGDIA/RAP1A	61	BP
GO:0045446	endothelial cell differentiation	33/1159	121/18903	1.67307e-13	2.13e-12	7.5666e-13	TNF/IL1B/ICAM1/EDNRA/PDE4D/F2RL1/XDH/CXCR4/VEGFA/BMP6/TNFRSF1A/CTNNB1/IKBKB/GPX1/ACVRL1/NOTCH1/KDR/RAPGEF3/NRG1/EDNRB/TJP1/S1PR1/ACVR1/PLCB1/JAG1/S1PR3/ROCK2/PDPN/ROCK1/S1PR2/ZEB1/HPSE/RAP1A	33	BP
GO:0001890	placenta development	37/1159	150/18903	1.75471e-13	2.23e-12	7.9193e-13	CSF2/PTGS2/PPARG/CASP8/EGFR/MAPK14/MME/PARP1/VDR/CEBPB/SOD1/MAPK1/ST14/CYP27B1/SPP1/HIF1A/NCOA1/AKT1/CEBPA/PKD1/ANG/MAP2K1/CTSB/MEN1/PTK2/PRDM1/ARNT/LEF1/HES1/DNAJB6/BIRC2/STK4/SETD2/EPAS1/BPTF/GRB2/PPARD	37	BP
GO:0032386	regulation of intracellular transport	59/1159	336/18903	1.85881e-13	2.36e-12	8.37164e-13	TGFB1/IL1B/PTGS2/SMAD3/ITGB2/ITGAM/ANGPT1/CDH1/MAPK14/CHRM1/GZMB/MAPK3/HSP90AA1/FYN/SRC/MAPK1/JAK2/SHH/MAVS/RAC2/ERBB2/GAS1/MAPK8/RAPGEF3/ANXA2/HAX1/PRKCD/FLNA/HDAC3/MAP2K1/GSK3B/BAG3/PARK7/LMAN1/EHD1/PIK3R1/HSPA1L/CD81/RAN/ATP2A1/XPO1/HUWE1/SFN/LRRK2/RNF31/SETD2/PRKACA/PCSK9/PRKAA1/TCF7L2/NMT1/KIF20B/PTPN1/MAP2K2/HRAS/CDK1/KCNE1/CIB1/LCP1	59	BP
GO:0043409	negative regulation of MAPK cascade	41/1159	181/18903	1.89589e-13	2.4e-12	8.52094e-13	IRAK3/TLR4/GSTP1/IL1B/TLR9/PPARG/F2RL1/LYN/DUSP1/ACE2/NPPA/PTEN/CAV1/BMP2/MYC/PIN1/AGT/PTPRC/GBA1/DUSP10/ABL1/PRKCD/IGF1R/PHB1/PRMT1/DUSP2/HDAC3/PEBP1/DAG1/MEN1/HMGCR/SFRP1/ITCH/PTPN6/DNAJA1/ZMYND11/MECOM/PPIA/PTPN1/GPER1/DUSP6	41	BP
GO:0001558	regulation of cell growth	68/1159	422/18903	1.92892e-13	2.43e-12	8.63357e-13	TGFB1/SMAD3/EGFR/CXCL12/CDH1/CXCR4/RHOA/VEGFA/CD38/TGFBR1/ENPP1/MTOR/CYP27B1/ADAM17/G6PD/SPP1/TP53/ERBB2/ACVRL1/IFRD1/ENO1/HSPA1A/RPS6KA3/PRKCQ/BDKRB1/SIRT1/AGTR1/AKT1/CDKN2A/HYAL1/F2/GJA1/BCL6/AGT/RPS6KA1/ABL1/PHB1/MMP14/PPARA/TRPV2/DDR1/SMARCA4/HBEGF/CDKN1A/GSK3B/SFRP1/ITCH/SGK1/ESR2/SFN/SPHK2/ADIPOR1/HNF4A/CDC42/LIMK1/PPT1/PTK2B/FBP1/MAPT/TEAD1/SLC44A4/SPHK1/EGLN2/YAP1/PPARD/CIB1/TRPC5/NPR1	68	BP
GO:0060537	muscle tissue development	68/1159	422/18903	1.92892e-13	2.43e-12	8.63357e-13	TGFB1/SMAD3/EDNRA/CREB1/MAPK14/ITGB1/RHOA/VEGFA/FOS/TGFBR1/PTCH1/NPPA/SHH/CTNNB1/MTOR/G6PD/PTEN/RUNX1/CAV1/GPX1/NOTCH1/IFRD1/ERBB4/EP300/BMP2/NRG1/S1PR1/GJA1/DKK1/AGT/ACVR1/SIX1/NOX4/ABL1/ZMPSTE24/CFLAR/EGR1/PRMT1/PPARA/NR4A1/PLEC/CHRNA1/PPARGC1A/RBP4/ALDH1A2/SLC8A1/RYR1/RARA/FLNB/MYH7/PDGFRB/LEF1/PTCD2/FOXC2/TPM1/RARB/ADRA1A/RPS6KB1/KRAS/CDC42/FLOT1/MAP2K4/EPHB1/PRKAA1/PIM1/YAP1/CDK1/CSRP1	68	BP
GO:0014009	glial cell proliferation	22/1159	54/18903	2.05683e-13	2.59e-12	9.18711e-13	TNF/IL6/IL33/IL1B/LTA/CSF1/LYN/CHRM1/CX3CL1/SHH/ABCC8/TP53/NOTCH1/CLU/CSF1R/GBA1/HES1/KRAS/E2F1/PTK2B/PRKCH/SLC7A5	22	BP
GO:0003044	regulation of systemic arterial blood pressure mediated by a chemical signal	21/1159	49/18903	2.16876e-13	2.72e-12	9.6671e-13	ADRB2/NOS3/PDE4D/F2RL1/TACR1/ACE2/RHOA/F2R/HSD11B2/SOD2/ADRB1/EDNRB/AGTR1/AGT/ECE1/REN/NOX1/TPM1/ADRA1A/AVPR2/SUCNR1	21	BP
GO:0061448	connective tissue development	52/1159	274/18903	2.23709e-13	2.8e-12	9.95121e-13	TGFB1/SMAD3/IL6R/IL17F/CSF1/PPARG/ITGB3/MAPK14/CCN2/MAPK3/TGFBR1/BMP6/CTNNB1/RORC/RUNX1/CASR/ACVRL1/NOTCH1/BMP2/HIF1A/COL1A1/NCOA1/CD44/HMGA2/COL2A1/SIRT1/PTHLH/HYAL1/CBS/ATP7A/ZMPSTE24/CFLAR/EGR1/PKD1/PPARGC1A/CTSK/MMP13/RARA/THRA/PDGFRB/CDK4/FOXC2/SERPINH1/PIK3CA/RARB/XBP1/FGF4/PPARD/RXFP1/HRAS/ZEB1/ESRRA	52	BP
GO:0031669	cellular response to nutrient levels	47/1159	231/18903	2.2902e-13	2.86e-12	1.01666e-12	HMOX1/ALB/NFE2L2/AOC1/VDR/MAPK3/FOS/FAS/MAPK1/MTOR/CYP27B1/FOXO3/AKR1C3/TP53/CASR/MAPK8/COL1A1/PRKAA2/NCOA1/SIRT1/MAP3K5/BECN1/GBA1/IGF1R/FNIP1/SLC2A1/PPARA/HSPA8/ATG7/CDKN1A/CTSK/SFRP1/SLC34A1/FADS1/KAT5/HSPA5/LRRK2/XBP1/PCSK9/PRKAA1/SLC7A5/MAP1LC3B/SUV39H1/PIM1/SRD5A1/MAP1LC3A/KLF10	47	BP
GO:0061008	hepaticobiliary system development	36/1159	144/18903	2.40578e-13	3e-12	1.06578e-12	TNF/IL6/SMAD3/HMOX1/ARG1/JUN/CEBPB/SOD2/PTCH1/CYP1A1/CCND1/NOTCH1/TGFA/CEBPA/UGT1A6/RPS6KA1/RELA/ATP7A/ZMPSTE24/CFLAR/PKD1/ALDH1A2/RARA/HES1/PTCD2/PIK3CA/XBP1/HNF4A/UPB1/AURKA/UGT1A1/PCSK9/SLC7A5/ELK1/FGF1/SRD5A1	36	BP
GO:0033673	negative regulation of kinase activity	48/1159	240/18903	2.49515e-13	3.11e-12	1.10312e-12	IRAK3/GSTP1/IL1B/PPARG/LYN/DUSP1/CASP3/NPPA/PTEN/CAV1/BMP2/HSPB1/SIRT1/AKT1/CDKN2A/CEBPA/PDPK1/AGT/PTPRC/GBA1/DUSP10/ABL1/PRKCD/DVL1/APC/SMYD3/FABP4/PLEC/CDKN1A/MEN1/PLK1/HMGCR/SFRP1/SLC8A1/PARK7/PTPN6/YWHAG/SFN/DNAJA1/IPO7/MAPT/PIP4K2A/AKT1S1/DUSP22/HEXIM1/PPIA/PTPN1/SNCA	48	BP
GO:0042310	vasoconstriction	27/1159	83/18903	2.50822e-13	3.12e-12	1.10664e-12	CYSLTR1/PTGS2/EDNRA/CHRM3/TACR1/MMP2/ACE2/RHOA/F2R/CD38/CAV1/CASR/EDNRB/AGTR1/FGG/AGT/PIK3C2A/ABL1/ADRA2A/ECE1/TBXAS1/P2RX1/SLC8A1/SCNN1B/ADRA1A/AVPR2/ADRA2C	27	BP
GO:0032729	positive regulation of interferon-gamma production	26/1159	77/18903	2.56755e-13	3.19e-12	1.13051e-12	TNF/IL12B/CD14/TLR4/IL1B/IL18/LTA/TLR9/IL1R1/IL12RB1/PDE4D/TLR3/F2RL1/SLC11A1/TNFSF4/CCR2/CLEC7A/PDE4B/JAK2/HSPD1/RIPK2/ABL1/RASGRP1/KLRK1/SLC7A5/HRAS	26	BP
GO:0061041	regulation of wound healing	35/1159	137/18903	2.58893e-13	3.21e-12	1.13761e-12	TNF/ALOX5/SMAD3/NOS3/SERPINE1/NFE2L2/F2RL1/CXCR4/ITGB1/F2R/CLEC7A/PRKG1/THBD/MTOR/ABCC8/PTEN/CAV1/ANXA2/F3/FGG/F2/ADRA2A/PRKCD/DUOX1/HBEGF/THBS1/SLC12A2/PTK2/PDGFA/PRDX2/FOXC2/XBP1/HRAS/F12/HPSE	35	BP
GO:0033209	tumor necrosis factor-mediated signaling pathway	31/1159	109/18903	2.63136e-13	3.25e-12	1.15392e-12	TNF/GSTP1/F2RL1/STAT1/NFKBIA/CASP8/TNFRSF4/TNFSF13B/CHUK/CASP1/TNFRSF1A/FAS/JAK2/ADAM17/FOXO3/IKBKB/TRAF6/TP53/APOA1/HSPA1A/BIRC3/XIAP/RELA/CASP4/TRAF3IP2/RIPK1/BIRC2/PTK2B/SHARPIN/ILK/SPHK1	31	BP
GO:0009267	cellular response to starvation	40/1159	175/18903	2.73002e-13	3.36e-12	1.19236e-12	ALB/NFE2L2/AOC1/MAPK3/FOS/FAS/MAPK1/MTOR/FOXO3/AKR1C3/TP53/MAPK8/PRKAA2/SIRT1/MAP3K5/BECN1/GBA1/IGF1R/FNIP1/SLC2A1/PPARA/HSPA8/ATG7/CDKN1A/CTSK/SFRP1/SLC34A1/FADS1/KAT5/HSPA5/LRRK2/XBP1/PCSK9/PRKAA1/SLC7A5/MAP1LC3B/SUV39H1/SRD5A1/MAP1LC3A/KLF10	40	BP
GO:0051048	negative regulation of secretion	40/1159	175/18903	2.73002e-13	3.36e-12	1.19236e-12	TNF/IL12B/IL1B/HMOX1/CCR2/ADORA1/F2R/OPRM1/HRH3/KCNJ11/TNFRSF1A/ABCC8/NOTCH1/NRG1/GJA1/CRY1/CRY2/ADRA2A/MAOB/OPRK1/CNR1/HMGCR/SFRP1/P2RY1/ASIC1/CYP4F2/WNK1/VPS4B/DRD2/AVPR2/PFKL/DRD3/GABBR1/IRS1/NR1H3/FFAR4/SNCA/CD74/RAP1A/ADRA2C	40	BP
GO:0046686	response to cadmium ion	23/1159	60/18903	2.75287e-13	3.38e-12	1.19992e-12	HMOX1/ARG1/JUN/EGFR/CYP1A2/MAPK3/CHUK/FOS/SOD2/SOD1/MAPK1/CYBB/AKR1C3/MAPK8/AKT1/KIT/ATP7A/NCF1/SLC34A1/ERCC1/NPC1/NUDT1/CDK1	23	BP
GO:1990845	adaptive thermogenesis	38/1159	160/18903	2.99297e-13	3.67e-12	1.30195e-12	ADRB2/IL4R/IL4/TLR4/IL18/TRPV1/CCR2/LCN2/CXCR4/VEGFA/CEBPB/JAK2/ADAM17/CAV1/NOTCH1/DDIT3/MC4R/NR1D1/ADRB1/GJA1/NR1H2/IGF1R/EHMT1/APC/HDAC3/TRPV2/ALPL/FABP4/ACHE/PPARGC1A/THRA/FOXC2/ADIPOR1/EPAS1/PRDM16/CMKLR1/NR1H3/FFAR4	38	BP
GO:0051348	negative regulation of transferase activity	52/1159	276/18903	3.01687e-13	3.69e-12	1.30972e-12	IRAK3/GSTP1/IL1B/PPARG/LYN/DUSP1/CASP3/SRC/NPPA/PTEN/TP53/CAV1/BMP2/HSPB1/SIRT1/AKT1/CDKN2A/CEBPA/PDPK1/AGT/PTPRC/GBA1/DUSP10/ABL1/PRKCD/DVL1/APC/SMYD3/FABP4/PLEC/CDKN1A/MEN1/GSK3B/PLK1/HMGCR/SFRP1/SLC8A1/PARK7/PTPN6/YWHAG/SFN/DNAJA1/IPO7/LIMK1/MAPT/PIP4K2A/AKT1S1/DUSP22/HEXIM1/PPIA/PTPN1/SNCA	52	BP
GO:0032869	cellular response to insulin stimulus	44/1159	208/18903	3.22742e-13	3.94e-12	1.39832e-12	IL1B/PPARG/STAT1/PARP1/SRC/GPT/ENPP1/GAB1/NCOA1/PKM/PRKCQ/SIRT1/AKT1/PDPK1/AGT/PIK3C2A/PRKCD/IGF1R/CFLAR/PRKDC/APC/GSK3B/INSR/PIK3R1/CDK4/FOXC2/YWHAG/PIK3CA/PKLR/XBP1/ADIPOR1/RPS6KB1/SHC1/SLC22A12/FBP1/PCSK9/PRKAA1/PIP4K2A/SLC27A1/GRB2/PTPN1/IRS1/SRD5A1/ESRRA	44	BP
GO:0090087	regulation of peptide transport	41/1159	184/18903	3.39283e-13	4.13e-12	1.46705e-12	TNF/ALOX5/CCL5/IL6/IL1B/NOS2/ADORA1/CD38/KCNJ11/JAK2/ABCC8/CASR/ANO1/HIF1A/NR1D1/FGG/AIMP1/ADRA2A/CNR1/TRPM2/SLC26A6/SFRP1/RBP4/GCG/PFKM/DRD2/SLC16A1/SSTR5/CA2/HNF4A/PFKL/OSBP/TCF7L2/GPR68/GABBR1/IRS1/PPARD/GPER1/FFAR4/CD74/FFAR1	41	BP
GO:0030100	regulation of endocytosis	44/1159	209/18903	3.85123e-13	4.68e-12	1.66195e-12	IL4/CD14/SERPINE1/ALOX15/C3/F2RL1/ITGB3/SELE/ANGPT1/VEGFA/SRC/CCL19/PLCG2/CAV1/TF/LRP1/CLU/CCL21/ANXA2/ARRB1/DKK1/NR1H2/ABL1/CD63/RAC1/CDH13/INSR/DRD2/LRRK2/CDC42/PPT1/ARF1/FLOT1/PCSK9/TNK2/PICALM/DRD3/ARFGAP1/SPHK1/ROCK1/PTPN1/NR1H3/SNCA/AAK1	44	BP
GO:0090218	positive regulation of lipid kinase activity	18/1159	36/18903	4.16322e-13	5.05e-12	1.79301e-12	TGFB1/NOD2/LYN/CCR7/FLT1/SRC/CCL19/CCL21/P2RY12/F2/KIT/TEK/PTK2/PDGFRB/CD81/CDC42/PTK2B/IRS1	18	BP
GO:0042180	cellular ketone metabolic process	45/1159	218/18903	4.3464e-13	5.26e-12	1.86819e-12	IL1B/PTGS2/PPARG/NQO1/IDO1/HSD11B2/BMP6/AKR1C3/CAV1/APOA1/BMP2/NR1D1/EDNRB/SIRT1/AKT1/AKR1B1/NR1H2/EGR1/PPARA/CNR1/PPARGC1A/FABP1/PARK7/SCNN1B/CYP4F2/CYP17A1/BRCA1/CBR1/CACNA1H/SLC7A11/CES1/BHMT/NR4A3/HSD17B1/NMT1/AFP/IRS1/NR1H3/PPARD/AKR1A1/SRD5A1/SNCA/CD74/AKR1C1/IDO2	45	BP
GO:0003014	renal system process	33/1159	125/18903	4.57211e-13	5.53e-12	1.96132e-12	EDNRA/F2RL1/TRPV1/TACR1/ADORA1/RHOA/F2R/HSD11B2/AKR1C3/EDNRB/AGTR1/AKR1B1/AGT/KCNQ1/AQP1/REN/SLC5A1/SGK1/CYP4F2/ABCG2/KCNMA1/MCAM/DRD2/ADRA1A/AVPR2/SLC22A12/ATP6V1B1/PRKACA/PRKACB/TRPV5/DRD3/SUCNR1/NPR1	33	BP
GO:0034504	protein localization to nucleus	55/1159	306/18903	4.65403e-13	5.61e-12	1.99251e-12	TGFB1/PTGS2/SMAD3/NFKBIA/ANGPT1/CDH1/MAPK14/PARP1/HSP90AA1/FYN/SRC/JAK2/SHH/MAVS/RANBP6/TFRC/TP53/NOTCH1/COL1A1/AKT1/PIN1/F2/DCLK1/CRY2/CTNNA1/AGT/SIX1/MDM2/PRKCD/FLNA/DVL1/HDAC3/CDKN1A/GSK3B/PLK1/BAG3/TNPO1/KPNB1/PARK7/CCT8/PIK3R1/TRAF3IP2/RAN/XPO1/DNAJB6/IPO7/LRRK2/ELAVL1/STK4/SQSTM1/DRD1/CCT5/PIKFYVE/YAP1/CDK1	55	BP
GO:0106106	cold-induced thermogenesis	36/1159	147/18903	4.7038e-13	5.65e-12	2.00589e-12	ADRB2/IL4R/IL4/TLR4/IL18/CCR2/LCN2/CXCR4/VEGFA/CEBPB/JAK2/ADAM17/CAV1/NOTCH1/DDIT3/NR1D1/ADRB1/GJA1/NR1H2/IGF1R/EHMT1/APC/HDAC3/TRPV2/ALPL/FABP4/ACHE/PPARGC1A/THRA/FOXC2/ADIPOR1/EPAS1/PRDM16/CMKLR1/NR1H3/FFAR4	36	BP
GO:0120161	regulation of cold-induced thermogenesis	36/1159	147/18903	4.7038e-13	5.65e-12	2.00589e-12	ADRB2/IL4R/IL4/TLR4/IL18/CCR2/LCN2/CXCR4/VEGFA/CEBPB/JAK2/ADAM17/CAV1/NOTCH1/DDIT3/NR1D1/ADRB1/GJA1/NR1H2/IGF1R/EHMT1/APC/HDAC3/TRPV2/ALPL/FABP4/ACHE/PPARGC1A/THRA/FOXC2/ADIPOR1/EPAS1/PRDM16/CMKLR1/NR1H3/FFAR4	36	BP
GO:1901224	positive regulation of NIK/NF-kappaB signaling	24/1159	67/18903	4.81629e-13	5.78e-12	2.04982e-12	TNF/IL12B/CD14/TLR4/IL1B/TLR2/IL18/NOD2/TLR9/NOD1/CD86/TLR3/EGFR/RHOA/MMP8/IRAK1/CCL19/TRAF6/EP300/NR3C2/RELA/PHB1/ILK/SPHK1	24	BP
GO:0009749	response to glucose	42/1159	194/18903	4.91183e-13	5.88e-12	2.08639e-12	ICAM1/SMAD2/CCN2/RHOA/CASP3/FOXO3/CASR/GPX1/ANO1/HIF1A/NR1D1/PRKAA2/NOX4/ADRA2A/IGF1R/EGR1/RAF1/SMARCA4/OPRK1/NCF1/THBS1/MEN1/SLC8A1/GCG/PCSK1/KAT5/PIK3CA/PKLR/XBP1/RPS6KB1/HNF4A/PFKL/PRKACA/SERPINF1/OSBP/PTK2B/PRKAA1/TCF7L2/LIN28A/GPR68/PPARD/GPER1	42	BP
GO:0042594	response to starvation	44/1159	211/18903	5.46311e-13	6.53e-12	2.31601e-12	ALB/NFE2L2/AOC1/MAPK3/FOS/GPT/FAS/MAPK1/MTOR/FOXO3/AKR1C3/TP53/DDIT3/MAPK8/PRKAA2/SIRT1/MAP3K5/BECN1/GBA1/IGF1R/FNIP1/SLC2A1/PPARA/HSPA8/ATG7/CDKN1A/PPARGC1A/CTSK/SFRP1/SLC34A1/FADS1/KAT5/HSPA5/LRRK2/XBP1/UGT1A1/PCSK9/PRKAA1/SLC7A5/MAP1LC3B/SUV39H1/SRD5A1/MAP1LC3A/KLF10	44	BP
GO:0042088	T-helper 1 type immune response	20/1159	46/18903	5.8266e-13	6.93e-12	2.46048e-12	IL12B/IL4R/TLR4/IL33/IL1B/IL18/IL1R1/IL12RB1/CD80/SLC11A1/HMGB1/TNFSF4/CCR2/CCL19/MTOR/JAK3/TRAF6/RIPK2/LEF1/HRAS	20	BP
GO:2000273	positive regulation of signaling receptor activity	20/1159	46/18903	5.8266e-13	6.93e-12	2.46048e-12	ADRB2/CCL2/IFNGR2/HDAC2/CCR2/ADORA1/ITGB1/HDAC1/JAK2/ADAM17/HIF1A/TGFA/ADRA2A/NCF1/HBEGF/PARK7/HDAC6/NCOA3/EREG/ADRA2C	20	BP
GO:1903409	reactive oxygen species biosynthetic process	23/1159	62/18903	6.24025e-13	7.41e-12	2.63003e-12	ALOX5/TLR4/CYP1A2/RHOA/MMP8/FYN/SOD2/SOD1/PLCG2/CYBB/CYP1A1/FOXO3/NOX4/CFLAR/MAOB/PPARA/DUOX1/NCF1/PARK7/SPHK2/PIKFYVE/TRAP1/SNCA	23	BP
GO:0050886	endocrine process	28/1159	93/18903	7.933e-13	9.4e-12	3.33697e-12	IL1B/NOS3/PPARG/F2RL1/CRHR1/TACR1/ACE2/RHOA/F2R/HSD11B2/BMP6/SPP1/EDNRB/AGTR1/GJA1/CRY1/CRY2/AGT/KCNQ1/ECE1/AQP1/REN/NOX1/OPRK1/GALR1/KRAS/AVPR2/SUCNR1	28	BP
GO:0035270	endocrine system development	34/1159	135/18903	8.83928e-13	1.05e-11	3.71098e-12	IL6/NR3C1/SMAD3/IL6R/SMAD2/EDNRA/CRHR1/CREB1/CDH1/MAPK3/TGFBR1/BMP6/MAPK1/SHH/APOA1/BMP2/CYP1B1/AKT1/PDPK1/SIX1/RAF1/MAP2K1/MEN1/GSK3B/INSR/ALDH1A2/PCSK1/THRA/HES1/DRD2/BAK1/HNF4A/SRD5A1/MAP2K2	34	BP
GO:0001776	leukocyte homeostasis	29/1159	100/18903	8.95487e-13	1.06e-11	3.75224e-12	IL6/MIF/CSF1/HMGB1/LYN/CXCR2/BTK/F2R/TNFSF13B/CASP3/PDE4B/FAS/ADAM17/JAK3/BAX/HIF1A/LAT/AKT1/ABL1/CXCL6/SOS1/PRDX2/TRAF3IP2/BCL2L11/SLC40A1/BAK1/SLC7A11/MTHFD1/CD74	29	BP
GO:1900182	positive regulation of protein localization to nucleus	27/1159	87/18903	9.02666e-13	1.06e-11	3.77502e-12	TGFB1/PTGS2/SMAD3/CDH1/MAPK14/PARP1/HSP90AA1/FYN/SRC/JAK2/SHH/MAVS/TFRC/AKT1/F2/PRKCD/FLNA/HDAC3/PLK1/BAG3/PARK7/CCT8/PIK3R1/RAN/CCT5/YAP1/CDK1	27	BP
GO:1900274	regulation of phospholipase C activity	19/1159	42/18903	9.20203e-13	1.08e-11	3.84095e-12	CD86/EDNRA/C5AR1/SELE/EGFR/FLT1/FGFR1/ESR1/ADCYAP1R1/P2RY12/AGT/KIT/ABL1/NMUR1/PHB1/ANG/PDGFRB/ADRA1A/HRAS	19	BP
GO:0002444	myeloid leukocyte mediated immunity	30/1159	107/18903	9.60696e-13	1.13e-11	4.00225e-12	IL4R/IL4/IL6/HMOX1/ITGB2/ARG1/C3/CX3CR1/F2RL1/ITGAM/LYN/CCR2/BTK/ADAM17/MAVS/TREM1/RAC2/IRAK4/LAT/F2/PDPK1/DDX1/KIT/CXCL6/DNASE1/SCNN1B/RASGRP1/TRAF3IP2/SPHK2/NR4A3	30	BP
GO:0002828	regulation of type 2 immune response	17/1159	33/18903	9.98047e-13	1.17e-11	4.14987e-12	IL4R/IL4/IL6/IL33/IL18/NOD2/NLRP3/CD86/ARG1/TNFSF4/CCR2/IDO1/BCL6/IFNA2/RARA/CD81/CD74	17	BP
GO:0002695	negative regulation of leukocyte activation	42/1159	198/18903	1.01235e-12	1.18e-11	4.20127e-12	IL4R/IL4/IRF1/HMOX1/CD86/ARG1/CD80/HMGB1/LYN/TNFSF4/CCR2/IDO1/BTK/CASP3/CEBPB/CX3CL1/SHH/JAK3/PTEN/RUNX1/ERBB2/NR1D1/VSIR/CD274/BCL6/PTPRC/CR1/PDCD1LG2/CNR2/ATM/IFNA2/CNR1/SFRP1/ITCH/PTPN6/PRDX2/PDE5A/INPP5D/DUSP22/NR1H3/GPER1/CD74	42	BP
GO:0002830	positive regulation of type 2 immune response	13/1159	18/18903	1.04156e-12	1.21e-11	4.306e-12	IL4R/IL4/IL6/IL33/IL18/NOD2/NLRP3/CD86/TNFSF4/IDO1/RARA/CD81/CD74	13	BP
GO:0051770	positive regulation of nitric-oxide synthase biosynthetic process	13/1159	18/18903	1.04156e-12	1.21e-11	4.306e-12	TLR4/IL33/TLR2/CCL2/NOD2/TLR9/STAT1/JAK2/JAK3/KDR/NAMPT/LRRK2/MAP2K4	13	BP
GO:0046631	alpha-beta T cell activation	39/1159	174/18903	1.05049e-12	1.22e-11	4.33467e-12	IL12B/IL4R/IL4/IL6/IL18/IL6R/IRF1/NLRP3/CD86/IL12RB1/CD80/HMGB1/TNFSF4/CCR2/RHOA/CCL19/RORA/JAK2/SHH/MTOR/RORC/JAK3/RUNX1/VSIR/PRKCQ/MALT1/RIPK2/CD274/BCL6/PTPRC/ATP7A/ABL1/ITCH/PRDM1/RARA/CD81/LEF1/HSPH1/HLA-DRB3	39	BP
GO:0046890	regulation of lipid biosynthetic process	40/1159	182/18903	1.05624e-12	1.23e-11	4.3501e-12	TNF/IL1B/NR3C1/PTGS2/IL1A/C3/NFKB1/CREB1/SOD1/BMP6/MTOR/CYP27B1/AKR1C3/APOA1/BMP2/NR1D1/SIRT1/AKT1/NR1H2/PRKCD/IGF1R/EGR1/PPARA/PDGFA/CDK4/KAT5/ATP1A1/BRCA1/CAPN2/LPCAT1/SPHK2/CES1/SCARB1/PRKAA1/SPHK1/SLC27A1/FGF1/NR1H3/GPER1/CD74	40	BP
GO:0043401	steroid hormone mediated signaling pathway	34/1159	136/18903	1.11037e-12	1.29e-11	4.56436e-12	NR3C1/PARP1/RHOA/HDAC1/AR/SRC/JAK2/ESR1/EP300/NR3C2/NR1D1/SIRT1/CRY1/CRY2/PHB1/PPARA/SKP2/SMARCA4/RXRB/SFRP1/PARK7/HDAC6/KDM4C/ESR2/BRCA1/DNAJA1/NR4A3/EGLN2/YAP1/PPARD/GPER1/NR2C1/PGR/ESRRA	34	BP
GO:0032388	positive regulation of intracellular transport	42/1159	199/18903	1.20883e-12	1.4e-11	4.95968e-12	TGFB1/IL1B/PTGS2/SMAD3/ITGB2/ITGAM/CDH1/MAPK14/CHRM1/GZMB/HSP90AA1/FYN/JAK2/SHH/MAVS/RAC2/ERBB2/MAPK8/RAPGEF3/ANXA2/PRKCD/FLNA/HDAC3/GSK3B/BAG3/EHD1/PIK3R1/HSPA1L/CD81/RAN/ATP2A1/HUWE1/SFN/RNF31/PRKACA/PRKAA1/TCF7L2/NMT1/KIF20B/HRAS/CDK1/CIB1	42	BP
GO:0071901	negative regulation of protein serine/threonine kinase activity	32/1159	122/18903	1.25164e-12	1.44e-11	5.12283e-12	IRAK3/GSTP1/IL1B/PPARG/LYN/DUSP1/CASP3/NPPA/PTEN/CAV1/BMP2/SIRT1/AKT1/CDKN2A/CEBPA/AGT/GBA1/DUSP10/ABL1/PRKCD/APC/CDKN1A/MEN1/PLK1/HMGCR/SFRP1/SLC8A1/PTPN6/DNAJA1/IPO7/HEXIM1/PTPN1	32	BP
GO:0051341	regulation of oxidoreductase activity	30/1159	108/18903	1.25333e-12	1.44e-11	5.12283e-12	TNF/IL1B/NOD2/IL1A/NOD1/NFKB1/EGFR/VDR/CYP27B1/CAV1/HIF1A/AGTR1/GZMA/AKT1/AGT/ATP7A/ABL1/CNR2/CNR1/PARK7/HDAC6/CDH3/SPHK2/LRRK2/PTK2B/SCARB1/SNCA/DDAH1/HM13/AOC3	30	BP
GO:0046634	regulation of alpha-beta T cell activation	31/1159	115/18903	1.27421e-12	1.46e-11	5.19838e-12	IL12B/IL4R/IL4/IL18/IRF1/NLRP3/CD86/IL12RB1/CD80/HMGB1/TNFSF4/CCR2/RHOA/CCL19/JAK2/SHH/JAK3/RUNX1/VSIR/PRKCQ/MALT1/RIPK2/CD274/BCL6/PTPRC/ITCH/PRDM1/RARA/CD81/HSPH1/HLA-DRB3	31	BP
GO:0042176	regulation of protein catabolic process	60/1159	361/18903	1.35307e-12	1.55e-11	5.50974e-12	TNF/IRAK3/IL33/IL1B/NOS2/SMAD3/NFE2L2/NQO1/EGFR/CDH1/HSP90AA1/FYN/SHH/CAV1/GPX1/CDK2/FBXO11/LRP1/CLU/HSPA1A/NRG1/ANXA2/AKT1/CEBPA/PIN1/GBA1/RELA/MDM2/ADRA2A/PHB1/FLNA/STUB1/DVL1/APC/PKD1/ATG7/GSK3B/PLK1/HMGCR/ITCH/PARK7/PSMD1/CD81/FZR1/XPO1/PSMD14/LPCAT1/AXIN1/LRRK2/PRKACA/AURKA/EEF1A1/ARAF/GRIN2A/PCSK9/EGLN2/ROCK1/CHEK2/SNCA/KEAP1	60	BP
GO:0002218	activation of innate immune response	23/1159	64/18903	1.3628e-12	1.56e-11	5.53893e-12	TLR4/TLR9/MBL2/CREBBP/HMGB1/LYN/HSP90AA1/FYN/CLEC7A/SRC/PLCG2/MAVS/IKBKB/TRAF6/EP300/MAP3K7/PRKDC/HCK/TBK1/CGAS/KLRK1/HEXIM1/PAK3	23	BP
GO:0042092	type 2 immune response	18/1159	38/18903	1.36949e-12	1.57e-11	5.55571e-12	IL4R/IL4/IL6/IL33/IL18/NOD2/NLRP3/CD86/ARG1/TNFSF4/CCR2/IDO1/BCL6/IFNA2/RARA/CD81/TRAF3IP2/CD74	18	BP
GO:1901215	negative regulation of neuron death	44/1159	218/18903	1.78725e-12	2.04e-11	7.2369e-12	CCL2/HMOX1/CSF1/JUN/CX3CR1/ANGPT1/RHOA/F2R/CEBPB/SOD2/SOD1/CX3CL1/JAK2/LIG4/CTNNB1/CCND1/BAX/HIF1A/KDR/SIRT1/AKT1/GBA1/SIX1/IKBKG/PPARA/HYOU1/NTRK1/PPARGC1A/GSK3B/PARK7/BCL2L1/PIK3CA/LRRK2/SLC7A11/KRAS/NMNAT1/PPT1/SERPINF1/PTK2B/NR4A3/MAP2K4/ROCK1/HRAS/SNCA	44	BP
GO:0002262	myeloid cell homeostasis	38/1159	169/18903	1.84665e-12	2.1e-11	7.46347e-12	IL6/HMOX1/CSF1/STAT1/HMGB1/LYN/CXCR2/MAPK14/BTK/VEGFA/CASP3/PDE4B/SOD1/JAK2/ADAM17/G6PD/FOXO3/JAK3/BAX/HIF1A/HSPA1A/BCL6/KIT/PRKDC/PRMT1/IKZF1/KCNQ1/PRDX1/SCNN1B/THRA/ARNT/TRAF3IP2/BCL2L11/BAK1/SLC7A11/MTHFD1/EPAS1/INPP5D	38	BP
GO:0032743	positive regulation of interleukin-2 production	17/1159	34/18903	1.88237e-12	2.14e-11	7.59367e-12	IL1B/IL1A/CD86/CD80/PDE4D/CCR2/CLEC7A/PDE4B/PLCG2/TRAF6/RUNX1/PRKCQ/MALT1/RIPK2/PTPRC/ABL1/MAP3K7	17	BP
GO:0046394	carboxylic acid biosynthetic process	56/1159	326/18903	1.94861e-12	2.21e-11	7.84631e-12	ALOX5/GSTM1/GSTP1/IL1B/PTGS2/ALOX15/LTA4H/PTGS1/MIF/CYP3A4/IDO1/CYP1A2/CASP1/GGT1/CYP1A1/AKR1C3/APOA1/PTGES/NR1D1/GPX4/PRKAA2/SIRT1/CYP2C9/CBS/NR1H2/CTH/CYP2C8/TBXAS1/ALDH1A2/PARK7/FADS1/ELOVL1/HAO1/GLS/BRCA1/PAH/CBR1/PKLR/XBP1/MTHFD1/UPB1/CES1/OAT/PYCR1/BHMT/OSBP/ACACA/MTAP/PRKAA1/BCAT2/MGLL/MTHFD1L/NR1H3/AKR1A1/GAD1/CD74	56	BP
GO:0051767	nitric-oxide synthase biosynthetic process	14/1159	22/18903	1.97811e-12	2.24e-11	7.93559e-12	TLR4/IL33/GSTP1/TLR2/CCL2/NOD2/TLR9/STAT1/JAK2/JAK3/KDR/NAMPT/LRRK2/MAP2K4	14	BP
GO:0051769	regulation of nitric-oxide synthase biosynthetic process	14/1159	22/18903	1.97811e-12	2.24e-11	7.93559e-12	TLR4/IL33/GSTP1/TLR2/CCL2/NOD2/TLR9/STAT1/JAK2/JAK3/KDR/NAMPT/LRRK2/MAP2K4	14	BP
GO:0032677	regulation of interleukin-8 production	29/1159	103/18903	2.0437e-12	2.31e-11	8.18357e-12	TNF/CD14/TLR4/IL6/IL1B/TLR2/NOS2/NOD2/TLR9/IL17F/NOD1/SERPINE1/TLR1/TLR3/F2RL1/HMGB1/TLR5/F2R/CLEC7A/MAVS/DDIT3/HSPA1A/F3/ARRB1/PTPRC/RELA/PARK7/RIPK1/CD74	29	BP
GO:0051604	protein maturation	57/1159	336/18903	2.09884e-12	2.36e-11	8.38883e-12	PLA2G7/SERPINE1/CREBBP/CASP8/DPP4/MME/PARP1/ACE2/CASP3/SRC/CASP1/PTCH1/GGT1/CPN1/SHH/THBD/ADAM17/RUNX1/EP300/GAS1/ENO1/HSPD1/CTSS/VSIR/XIAP/ANXA2/RIPK2/F3/FGG/ZMPSTE24/FLNA/STUB1/MMP14/ECE1/CASP4/REN/PGK1/THBS1/PITRM1/MMEL1/CASP9/PCSK1/KLK1/CAPN2/SERPINH1/LRRK2/BAK1/DHCR24/PRKACA/PRKACB/BCHE/GRIN2A/PCSK9/PSEN2/CASP7/F12/HM13	57	BP
GO:1904035	regulation of epithelial cell apoptotic process	30/1159	110/18903	2.1109e-12	2.37e-11	8.42151e-12	TNF/IL4/IL6/ICAM1/CCL2/SERPINE1/HMOX1/NFE2L2/ANGPT1/JAK2/ESR1/FOXO3/AKR1C3/BAX/KDR/FGG/PDPK1/ABL1/IGF1R/CFLAR/PPARA/TEK/THBS1/STK4/PRKAA1/TCF7L2/CD248/YAP1/GPER1/PLCG1	30	BP
GO:0001763	morphogenesis of a branching structure	42/1159	203/18903	2.42534e-12	2.72e-11	9.6582e-12	TNF/EDNRA/CSF1/VDR/VEGFA/AR/SRC/PTCH1/SHH/ST14/CTNNB1/ESR1/CASR/NOTCH1/BMP2/KDR/MYC/AGT/ACVR1/SIX1/ABL1/PKD1/MMP14/DDR1/DAG1/LAMA1/SFRP1/PDGFA/PRDM1/LEF1/DRD2/FOXC2/LRRK2/KRAS/STK4/EPHA2/SETD2/ILK/FGF1/GRB2/YAP1/PGR	42	BP
GO:0016053	organic acid biosynthetic process	56/1159	328/18903	2.51654e-12	2.82e-11	1.0003e-11	ALOX5/GSTM1/GSTP1/IL1B/PTGS2/ALOX15/LTA4H/PTGS1/MIF/CYP3A4/IDO1/CYP1A2/CASP1/GGT1/CYP1A1/AKR1C3/APOA1/PTGES/NR1D1/GPX4/PRKAA2/SIRT1/CYP2C9/CBS/NR1H2/CTH/CYP2C8/TBXAS1/ALDH1A2/PARK7/FADS1/ELOVL1/HAO1/GLS/BRCA1/PAH/CBR1/PKLR/XBP1/MTHFD1/UPB1/CES1/OAT/PYCR1/BHMT/OSBP/ACACA/MTAP/PRKAA1/BCAT2/MGLL/MTHFD1L/NR1H3/AKR1A1/GAD1/CD74	56	BP
GO:0032637	interleukin-8 production	29/1159	104/18903	2.67027e-12	2.99e-11	1.05946e-11	TNF/CD14/TLR4/IL6/IL1B/TLR2/NOS2/NOD2/TLR9/IL17F/NOD1/SERPINE1/TLR1/TLR3/F2RL1/HMGB1/TLR5/F2R/CLEC7A/MAVS/DDIT3/HSPA1A/F3/ARRB1/PTPRC/RELA/PARK7/RIPK1/CD74	29	BP
GO:0032611	interleukin-1 beta production	30/1159	111/18903	2.72558e-12	3.04e-11	1.07746e-11	TNF/TLR4/IL6/GSTP1/NOD2/SMAD3/NOD1/NLRP3/CX3CR1/F2RL1/CASP8/CCR7/F2R/CLEC7A/CCL19/CASP1/CX3CL1/JAK2/APOA1/HSPB1/MALT1/RIPK2/NLRP1/EGR1/GSDMD/S1PR3/HK1/SPHK1/FFAR4/FFAR1	30	BP
GO:0032651	regulation of interleukin-1 beta production	30/1159	111/18903	2.72558e-12	3.04e-11	1.07746e-11	TNF/TLR4/IL6/GSTP1/NOD2/SMAD3/NOD1/NLRP3/CX3CR1/F2RL1/CASP8/CCR7/F2R/CLEC7A/CCL19/CASP1/CX3CL1/JAK2/APOA1/HSPB1/MALT1/RIPK2/NLRP1/EGR1/GSDMD/S1PR3/HK1/SPHK1/FFAR4/FFAR1	30	BP
GO:0043154	negative regulation of cysteine-type endopeptidase activity involved in apoptotic process	25/1159	78/18903	2.80058e-12	3.11e-11	1.10369e-11	TNF/PTGS2/VEGFA/SRC/GPX1/RPS6KA3/BIRC3/CD44/XIAP/AKT1/RPS6KA1/FNIP1/PRDX5/RAF1/AQP1/NR4A1/THBS1/FABP1/PARK7/SFN/DNAJB6/BIRC2/DHCR24/SNCA/DPEP1	25	BP
GO:0045137	development of primary sexual characteristics	46/1159	238/18903	2.80212e-12	3.11e-11	1.10369e-11	TLR9/IL1A/NOS3/TLR3/MMP2/VEGFA/CASP3/CEBPB/AR/SRC/TGFBR1/SOD1/ESR1/FOXO3/AKR1C3/CCND1/BAX/KDR/ADCYAP1R1/CYP1B1/SIRT1/CTNNA1/KIT/MMP14/ATM/ADAMTS1/ANG/REN/NTRK1/HSD17B4/SFRP1/INSR/SDC1/PDGFA/RARA/ERCC1/BCL2L1/PDGFRB/BCL2L11/HSPA5/NUDT1/AFP/EREG/SRD5A1/PGR/KCNE1	46	BP
GO:0010518	positive regulation of phospholipase activity	21/1159	55/18903	3.27934e-12	3.62e-11	1.28465e-11	CCL5/CD86/EDNRA/C5AR1/SELE/EGFR/FLT1/FGFR1/ESR1/ADCYAP1R1/P2RY12/AGTR1/PDPK1/AGT/KIT/NMUR1/PHB1/ANG/PDGFRB/ADRA1A/HRAS	21	BP
GO:0055078	sodium ion homeostasis	21/1159	55/18903	3.27934e-12	3.62e-11	1.28465e-11	IL1A/EDNRA/TACR1/ADORA1/ATP4A/SCNN1A/EDNRB/AGTR1/AGT/SCNN1G/SLC12A2/SLC8A1/SCNN1B/CYP4F2/ATP1A1/DRD2/SLC12A1/AVPR2/ATP6V1B1/DRD3/NPR1	21	BP
GO:1904645	response to amyloid-beta	21/1159	55/18903	3.27934e-12	3.62e-11	1.28465e-11	ADRB2/TNF/TLR4/ICAM1/VCAM1/MMP2/PARP1/MMP3/FYN/FOXO3/ABCC1/FPR2/LRP1/GJA1/IGF1R/CASP4/GSK3B/MMP13/GRM5/CACNA2D1/BCL2L11	21	BP
GO:0120162	positive regulation of cold-induced thermogenesis	28/1159	98/18903	3.3065e-12	3.64e-11	1.29295e-11	ADRB2/IL4R/IL4/IL18/CCR2/LCN2/CXCR4/VEGFA/CEBPB/JAK2/CAV1/ADRB1/GJA1/IGF1R/EHMT1/APC/HDAC3/TRPV2/ALPL/FABP4/ACHE/PPARGC1A/THRA/ADIPOR1/EPAS1/PRDM16/CMKLR1/FFAR4	28	BP
GO:0009416	response to light stimulus	55/1159	321/18903	3.41989e-12	3.76e-11	1.33488e-11	IL12B/PTGS2/CREBBP/MMP1/EGFR/MMP2/ITGB1/MME/PARP1/MMP3/CASP3/FOS/ABCC8/CCND1/TP53/GPX1/EP300/BAX/HIF1A/MAPK8/SIRT1/MYC/AKT1/HYAL1/CRY1/CRY2/KIT/RELA/MC1R/PRKCD/CHEK1/AQP1/MAPK10/CDKN1A/MEN1/HMGCR/CASP9/KMT2A/ERCC1/PIK3R1/FEN1/DRD2/BAK1/SLC7A11/KRAS/DRD1/GRK1/GRIN2A/PRKAA1/DRD3/NMT1/CASP7/ELK1/ATR/KCNE1	55	BP
GO:0009411	response to UV	35/1159	149/18903	3.63578e-12	3.99e-11	1.41659e-11	IL12B/PTGS2/CREBBP/MMP1/EGFR/MMP2/MME/PARP1/MMP3/CASP3/CCND1/TP53/GPX1/EP300/BAX/MAPK8/SIRT1/MYC/AKT1/HYAL1/RELA/MC1R/PRKCD/CHEK1/AQP1/CDKN1A/MEN1/CASP9/ERCC1/PIK3R1/FEN1/BAK1/PRKAA1/CASP7/ATR	35	BP
GO:0045637	regulation of myeloid cell differentiation	43/1159	214/18903	3.73946e-12	4.1e-11	1.45437e-11	TNF/IL12B/IL4/TGFB1/TLR4/CSF1/TLR3/STAT1/NFKBIA/LYN/CASP8/CREB1/LTF/PRKCA/MAPK14/CCR1/CEBPB/FOS/CTNNB1/MTOR/FOXO3/TRAF6/RUNX1/HIF1A/HSPA1A/MYC/HAX1/PRKDC/PRMT1/SFRP1/RARA/ARNT/JAG1/PIK3R1/LEF1/RIPK1/PTK2B/INPP5D/GPR68/ESRRA/CD74/CIB1/KLF10	43	BP
GO:0002768	immune response-regulating cell surface receptor signaling pathway	57/1159	341/18903	3.91054e-12	4.28e-11	1.51818e-11	MBL2/C5AR1/PDE4D/CREBBP/LYN/BTK/CCR7/LCK/CD38/FYN/CLEC7A/PDE4B/SRC/MAPK1/PLCG2/IKBKB/TRAF6/EP300/FPR2/BAX/MAPK8/ICOSLG/PRKCQ/MS4A1/MALT1/RIPK2/PTPRC/KIT/RELA/ABL1/CR1/IKBKG/PRKCD/MAP3K7/MAP3K1/MAPK10/FPR1/PTK2/PTPN6/SOS1/WNK1/CD81/PIK3CA/HCK/RNF31/LIMK1/NR4A3/KLRK1/MAP2K4/PRKCH/INPP5D/DUSP22/HLA-DRB3/CMKLR1/HRAS/PAK3/PLCG1	57	BP
GO:0010863	positive regulation of phospholipase C activity	18/1159	40/18903	4.11134e-12	4.49e-11	1.59329e-11	CD86/EDNRA/C5AR1/SELE/EGFR/FLT1/FGFR1/ESR1/ADCYAP1R1/P2RY12/AGT/KIT/NMUR1/PHB1/ANG/PDGFRB/ADRA1A/HRAS	18	BP
GO:0007178	transmembrane receptor protein serine/threonine kinase signaling pathway	62/1159	390/18903	4.17248e-12	4.55e-11	1.61409e-11	TGFB1/SMAD3/IL17F/SMAD2/JUN/PPARG/CREBBP/HDAC2/MAPK14/PARP1/MAPK3/HDAC1/FOS/SRC/TGFBR1/BMP6/JAK2/SHH/ADAM17/TP53/CAV1/ACVRL1/NOTCH1/EP300/TF/BMP2/LRP1/KDR/HSPA1A/XIAP/SIRT1/PIN1/PDPK1/COL1A2/DKK1/ACVR1/ABL1/TET1/MAP3K7/EGR1/STUB1/CSNK2B/PPARA/USP15/THBS1/MEN1/SFRP1/PTK2/BMPER/SMURF2/LEF1/HES1/HSPA5/AXIN1/HNF4A/PRDM16/DUSP22/HIVEP1/AFP/ILK/HPGD/ZEB1	62	BP
GO:0008631	intrinsic apoptotic signaling pathway in response to oxidative stress	19/1159	45/18903	4.2088e-12	4.58e-11	1.62524e-11	NFE2L2/PARP1/SOD2/SOD1/JAK2/GPX1/HSPB1/HIF1A/CYP1B1/SIRT1/AKT1/MAP3K5/PRKCD/VNN1/NOX1/PARK7/TRAP1/PPIA/MCL1	19	BP
GO:0022600	digestive system process	29/1159	106/18903	4.50898e-12	4.9e-11	1.73806e-11	TLR4/NOD2/TLR9/CHRM3/TRPV1/TACR1/CHRM1/VDR/SERPINA3/APOA1/NR1H2/ADRA2A/KCNQ1/AQP1/OPRK1/SLC5A1/SLC26A6/RBP4/FABP1/SGK1/WNK1/SLC46A1/NPC1/SCARB1/DRD3/NR1H3/CCKBR/AKR1C1/CHRM5	29	BP
GO:0002791	regulation of peptide secretion	39/1159	182/18903	4.6861e-12	5.08e-11	1.80312e-11	TNF/ALOX5/CCL5/IL6/IL1B/NOS2/ADORA1/CD38/KCNJ11/JAK2/ABCC8/CASR/ANO1/HIF1A/NR1D1/FGG/AIMP1/ADRA2A/CNR1/TRPM2/SFRP1/RBP4/GCG/PFKM/DRD2/SLC16A1/SSTR5/HNF4A/PFKL/OSBP/TCF7L2/GPR68/GABBR1/IRS1/PPARD/GPER1/FFAR4/CD74/FFAR1	39	BP
GO:0008406	gonad development	45/1159	233/18903	4.97122e-12	5.38e-11	1.90944e-11	TLR9/IL1A/NOS3/TLR3/MMP2/VEGFA/CASP3/CEBPB/AR/SRC/TGFBR1/SOD1/ESR1/FOXO3/AKR1C3/CCND1/BAX/KDR/CYP1B1/SIRT1/CTNNA1/KIT/MMP14/ATM/ADAMTS1/ANG/REN/NTRK1/HSD17B4/SFRP1/INSR/SDC1/PDGFA/RARA/ERCC1/BCL2L1/PDGFRB/BCL2L11/HSPA5/NUDT1/AFP/EREG/SRD5A1/PGR/KCNE1	45	BP
GO:0030072	peptide hormone secretion	44/1159	225/18903	5.52528e-12	5.97e-11	2.1185e-11	TNF/ALOX5/CCL5/IL6/IL1B/NOS2/IL1RN/SMAD2/CRHR1/CD38/KCNJ11/JAK2/ABCC8/CASR/ANO1/MC4R/HIF1A/NR1D1/FGG/AIMP1/ADRA2A/RAF1/AQP1/CNR1/TRPM2/SFRP1/RBP4/PARK7/GCG/PFKM/DRD2/SLC16A1/SSTR5/HNF4A/PFKL/OSBP/TCF7L2/GPR68/GABBR1/IRS1/PPARD/GPER1/FFAR4/FFAR1	44	BP
GO:0097696	receptor signaling pathway via STAT	39/1159	183/18903	5.61037e-12	6.05e-11	2.14732e-11	TNF/IL12B/IL4/TGFB1/CCL5/IL6/IL18/CSF2/CCL2/JAK1/IL6R/PPARG/STAT1/LYN/HDAC2/CCR2/F2R/FYN/TNFRSF1A/JAK2/JAK3/IL10RB/CAV1/NOTCH1/ERBB4/CYP1B1/IFNAR1/F2/CSF1R/AGT/PTPRC/KIT/PKD1/IFNA2/HES1/IFNA6/ADIPOR1/OSBP/PTK2B	39	BP
GO:0045428	regulation of nitric oxide biosynthetic process	22/1159	62/18903	5.63318e-12	6.05e-11	2.14846e-11	TNF/TLR4/IL1B/PTGS2/SMAD3/CX3CR1/TRPV1/MMP8/HSP90AA1/CLEC7A/SOD2/JAK2/CAV1/CLU/AKT1/AGT/RAC1/INSR/ROCK2/PTK2B/KLRK1/DDAH1	22	BP
GO:0046824	positive regulation of nucleocytoplasmic transport	22/1159	62/18903	5.63318e-12	6.05e-11	2.14846e-11	TGFB1/IL1B/PTGS2/SMAD3/CDH1/MAPK14/HSP90AA1/JAK2/SHH/MAVS/RAPGEF3/PRKCD/FLNA/HDAC3/GSK3B/BAG3/PIK3R1/RAN/SFN/PRKACA/TCF7L2/CDK1	22	BP
GO:0030316	osteoclast differentiation	28/1159	100/18903	5.6856e-12	6.1e-11	2.16464e-11	TNF/IL12B/IL4/TLR4/CSF1/TLR3/CREB1/LTF/MAPK14/CCR1/CEBPB/FOS/SRC/CTNNB1/MTOR/TRAF6/TFRC/TF/ANXA2/CSF1R/SFRP1/PIK3R1/CD81/EPHA2/INPP5D/GPR68/ESRRA/KLF10	28	BP
GO:2000146	negative regulation of cell motility	61/1159	383/18903	5.75279e-12	6.16e-11	2.18638e-11	TNF/IL4/TGFB1/IL33/CCL2/SERPINE1/HMOX1/MIF/NFE2L2/PPARG/CX3CR1/HMGB1/HDAC2/CXCL12/CDH1/DPP4/ADORA1/DUSP1/RHOA/ADORA3/HDAC1/PRKG1/CX3CL1/SHH/ABCC8/FOXO3/PTEN/ACVRL1/NOTCH1/LRP1/NRG1/CCL21/CYP1B1/AKT1/PIN1/GJA1/CXCL13/CTNNA1/DUSP10/TET1/PLCB1/CSNK2B/RAC1/DLC1/THBS1/DAG1/ZMYND8/SFRP1/APEX1/JAG1/DRD2/TPM1/ADIPOR1/SERPINF1/KLRK1/DUSP22/IFITM1/S1PR2/PPARD/CD74/DPEP1	61	BP
GO:0014013	regulation of gliogenesis	29/1159	107/18903	5.82821e-12	6.23e-11	2.21116e-11	TNF/TGFB1/IL6/IL33/IL1B/TLR2/LTA/LYN/HDAC2/CXCR4/HDAC1/SHH/CTNNB1/MTOR/ABCC8/TP53/NOTCH1/BMP2/NR1D1/F2/DUSP10/DAG1/HES1/KRAS/E2F1/PRKCH/DRD3/SLC7A5/LIN28A	29	BP
GO:0038034	signal transduction in absence of ligand	23/1159	68/18903	5.87785e-12	6.25e-11	2.21834e-11	TNF/IL4/IL1B/CSF2/IL1A/FAS/CX3CL1/FGFR1/FOXO3/BAX/HSPA1A/COL2A1/AKT1/CTNNA1/BCL2A1/GSK3B/BAG3/BCL2L1/PRDX2/BCL2L11/RIPK1/BAK1/MCL1	23	BP
GO:0042093	T-helper cell differentiation	23/1159	68/18903	5.87785e-12	6.25e-11	2.21834e-11	IL12B/IL4R/IL4/IL6/IL18/IL6R/NLRP3/CD86/IL12RB1/CD80/HMGB1/TNFSF4/CCL19/RORA/MTOR/RORC/JAK3/MALT1/RIPK2/BCL6/ATP7A/RARA/LEF1	23	BP
GO:0097192	extrinsic apoptotic signaling pathway in absence of ligand	23/1159	68/18903	5.87785e-12	6.25e-11	2.21834e-11	TNF/IL4/IL1B/CSF2/IL1A/FAS/CX3CL1/FGFR1/FOXO3/BAX/HSPA1A/COL2A1/AKT1/CTNNA1/BCL2A1/GSK3B/BAG3/BCL2L1/PRDX2/BCL2L11/RIPK1/BAK1/MCL1	23	BP
GO:0043393	regulation of protein binding	41/1159	200/18903	6.04559e-12	6.42e-11	2.27768e-11	ADRB2/ANGPT1/MAPK3/SRC/TGFBR1/ATP2A2/CAV1/EP300/BMP2/BAX/MAPK8/LRP1/ANXA2/RIPK2/AKT1/PIN1/DKK1/ATP2A3/ABL1/PRKCD/STUB1/DVL1/PKD1/PPARA/CDKN1A/MEN1/GSK3B/PLK1/ACTB/PARK7/GCG/RAN/LRRK2/STK4/PRKACA/AURKA/CDC42/FLOT1/PCSK9/TCF7L2/ROCK1	41	BP
GO:0019693	ribose phosphate metabolic process	70/1159	475/18903	6.64909e-12	7.05e-11	2.5007e-11	IL4/TGFB1/PDE4D/XDH/PARP1/RHOA/PDE4B/RORA/NPPA/ENPP1/MTOR/G6PD/EP300/HIF1A/ENO1/HSPA1A/PRKAA2/PKM/SULT1A1/PTHLH/PPARA/NT5E/HSPA8/PGK1/PPARGC1A/HSD17B4/HMGCR/INSR/AMPD1/SULT2B1/ELOVL1/PFKM/ARNT/MYH7/HPRT1/PRPS1/ALDOA/PDE7A/HINT1/NUDT3/PDE5A/RAN/NME1/PKLR/SPHK2/LRRK2/HK1/DGAT1/DHODH/CTPS1/MTHFD1/PFKL/UPB1/ATP6V1B1/EPHA2/IMPDH1/NMNAT1/PPT1/SLC25A1/ADCY1/ACACA/FBP1/PRKAA1/PYGL/OPA1/PANK1/DNM1L/SNCA/A…	70	BP
GO:0050728	negative regulation of inflammatory response	39/1159	184/18903	6.70708e-12	7.1e-11	2.51814e-11	ALOX5/IL12B/IL4/GSTP1/NOD2/SMAD3/NLRP3/PPARG/LYN/NFKB1/ADORA1/MAPK14/FYN/SRC/SOD1/TNFRSF1A/RORA/CX3CL1/APOA1/GPX1/FPR2/NR1D1/PTPRC/GBA1/DUSP10/PRKCD/CNR2/PPARA/NT5E/TEK/PSMA1/HCK/SERPINF1/SHARPIN/NR1H3/PPARD/GPER1/FFAR4/PLCG1	39	BP
GO:0002761	regulation of myeloid leukocyte differentiation	31/1159	122/18903	6.9509e-12	7.34e-11	2.60516e-11	TNF/IL12B/IL4/TGFB1/TLR4/CSF1/TLR3/LYN/CASP8/CREB1/LTF/PRKCA/CCR1/CEBPB/FOS/CTNNB1/MTOR/TRAF6/RUNX1/MYC/HAX1/SFRP1/RARA/PIK3R1/LEF1/RIPK1/INPP5D/GPR68/ESRRA/CD74/KLF10	31	BP
GO:0033555	multicellular organismal response to stress	25/1159	81/18903	7.21464e-12	7.61e-11	2.69934e-11	NOS1/TRPA1/TRPV1/CRHR1/TACR1/DPP4/IDO1/CALCA/MTOR/PTEN/ADRB1/EDNRB/ADCYAP1R1/AKT1/NMUR2/ADRA2A/VDAC1/EIF4E/NTRK1/THBS1/ASIC1/CAPN2/RPS6KB1/DRD1/SCN9A	25	BP
GO:0001938	positive regulation of endothelial cell proliferation	30/1159	115/18903	7.33476e-12	7.69e-11	2.73014e-11	CCL24/CCL26/HMOX1/ARG1/JUN/ITGB3/HMGB1/CXCL12/PRKCA/VEGFA/TGFBR1/BMP6/FGFR1/ADAM17/ACVRL1/BMP2/HIF1A/KDR/SIRT1/AGTR1/F3/AKT1/PDPK1/TEK/NR4A1/ANG/CDH13/ARNT/PLCG1/PGF	30	BP
GO:0035710	CD4-positive, alpha-beta T cell activation	30/1159	115/18903	7.33476e-12	7.69e-11	2.73014e-11	IL12B/IL4R/IL4/IL6/IL18/IL6R/NLRP3/CD86/IL12RB1/CD80/HMGB1/TNFSF4/CCL19/RORA/MTOR/RORC/JAK3/RUNX1/VSIR/PRKCQ/MALT1/RIPK2/CD274/BCL6/ATP7A/ITCH/RARA/CD81/LEF1/HLA-DRB3	30	BP
GO:1990748	cellular detoxification	30/1159	115/18903	7.33476e-12	7.69e-11	2.73014e-11	GSTM1/GSTP1/PTGS2/NOS3/ALB/PTGS1/NFE2L2/GSTT1/NQO1/SOD2/SOD1/GSTA1/ADH5/GPX1/GSTO1/PTGES/GPX4/PRDX6/ATP7A/PRDX5/GSTK1/DUOX1/FABP1/PARK7/PRDX1/MGST1/ABCG2/PRDX2/PIM1/AKR1A1	30	BP
GO:0032768	regulation of monooxygenase activity	21/1159	57/18903	7.38201e-12	7.73e-11	2.74301e-11	TNF/IL1B/IL1A/NOD1/NFKB1/EGFR/VDR/CYP27B1/CAV1/HIF1A/AKT1/ATP7A/CNR2/CNR1/PARK7/CDH3/PTK2B/SCARB1/SNCA/DDAH1/HM13	21	BP
GO:0032612	interleukin-1 production	32/1159	130/18903	8.02155e-12	8.37e-11	2.97046e-11	TNF/TLR4/IL6/GSTP1/NOD2/SMAD3/NOD1/NLRP3/CX3CR1/F2RL1/HMGB1/HDAC2/CASP8/CCR7/F2R/CLEC7A/CCL19/CASP1/CX3CL1/JAK2/APOA1/HSPB1/MALT1/RIPK2/NLRP1/EGR1/GSDMD/S1PR3/HK1/SPHK1/FFAR4/FFAR1	32	BP
GO:0032652	regulation of interleukin-1 production	32/1159	130/18903	8.02155e-12	8.37e-11	2.97046e-11	TNF/TLR4/IL6/GSTP1/NOD2/SMAD3/NOD1/NLRP3/CX3CR1/F2RL1/HMGB1/HDAC2/CASP8/CCR7/F2R/CLEC7A/CCL19/CASP1/CX3CL1/JAK2/APOA1/HSPB1/MALT1/RIPK2/NLRP1/EGR1/GSDMD/S1PR3/HK1/SPHK1/FFAR4/FFAR1	32	BP
GO:0031348	negative regulation of defense response	49/1159	272/18903	8.12167e-12	8.46e-11	3.00241e-11	ALOX5/IL12B/IL4/IRAK3/GSTP1/NOD2/SMAD3/NLRP3/ARG1/PPARG/LYN/NFKB1/ADORA1/MAPK14/PARP1/FYN/SRC/SOD1/TNFRSF1A/RORA/CX3CL1/APOA1/GPX1/FPR2/NR1D1/PTPRC/GBA1/DUSP10/NR1H2/CR1/PRKCD/CNR2/PPARA/NT5E/TEK/USP15/ITCH/SAMHD1/DRD2/PSMA1/HCK/SERPINF1/SHARPIN/OAS1/NR1H3/PPARD/GPER1/FFAR4/PLCG1	49	BP
GO:0033627	cell adhesion mediated by integrin	26/1159	88/18903	8.41343e-12	8.75e-11	3.10497e-11	CCL5/ICAM1/SERPINE1/ITGB2/ITGAL/ITGB3/ITGAM/LYN/DPP4/ITGB1/ADAM17/ITGB4/MUC1/CCL21/CYP1B1/P2RY12/CXCL13/PTK2/PTPN6/ITGA2B/WNK1/FOXC2/EPHA2/PIEZO1/ITGA1/CIB1	26	BP
GO:0010743	regulation of macrophage derived foam cell differentiation	16/1159	32/18903	8.51895e-12	8.83e-11	3.13323e-11	IL18/CSF2/CSF1/PPARG/ITGB3/NFKBIA/NFKB1/PLA2G2A/ABCA1/AGTR1/AGT/NR1H2/PPARA/PRKCH/MSR1/NR1H3	16	BP
GO:0043552	positive regulation of phosphatidylinositol 3-kinase activity	16/1159	32/18903	8.51895e-12	8.83e-11	3.13323e-11	TGFB1/NOD2/LYN/CCR7/FLT1/SRC/CCL19/CCL21/P2RY12/KIT/TEK/PTK2/PDGFRB/CDC42/PTK2B/IRS1	16	BP
GO:0002449	lymphocyte mediated immunity	59/1159	367/18903	8.67864e-12	8.98e-11	3.18655e-11	TNF/IL12B/IL4R/IL4/TGFB1/IL6/IL1B/IL18/ICAM1/LTA/NOD2/MBL2/IL1R1/HLA-DQA1/NLRP3/ARG1/C3/IL12RB1/HMGB1/TNFSF4/CCR2/CCR6/BTK/AHR/GZMB/LIG4/TRAF6/CTSC/TFRC/HSPD1/CLU/MALT1/BCL6/PTPRC/CR1/PRKCD/MAP3K7/IFNA2/PRF1/NBN/PRDX1/PTPN6/ERCC1/JAG1/HPRT1/TP53BP1/CD81/RASGRP1/TRAF3IP2/EXO1/C1S/KIF5B/KLRK1/INPP5D/DUSP22/HLA-DRB3/SLAMF7/CD74/TNFSF13	59	BP
GO:0097237	cellular response to toxic substance	31/1159	123/18903	8.75596e-12	9.04e-11	3.20951e-11	TNF/GSTM1/GSTP1/PTGS2/NOS3/ALB/PTGS1/NFE2L2/GSTT1/NQO1/SOD2/SOD1/GSTA1/ADH5/GPX1/GSTO1/PTGES/GPX4/PRDX6/ATP7A/PRDX5/GSTK1/DUOX1/FABP1/PARK7/PRDX1/MGST1/ABCG2/PRDX2/PIM1/AKR1A1	31	BP
GO:0098586	cellular response to virus	30/1159	116/18903	9.32187e-12	9.61e-11	3.41117e-11	CCL5/IL6/JAK1/SMAD3/NLRP3/CXCL10/TLR3/IFNGR2/NFKB1/MAPK14/HSP90AA1/CHUK/CCL19/JAK2/IFIH1/IL10RB/BAX/HIF1A/BIRC3/IFNAR1/PHB1/IFNA2/USP15/IRGM/IFNA6/BIRC2/ARF1/LGALS8/IKBKE/OAS1	30	BP
GO:0001649	osteoblast differentiation	46/1159	246/18903	9.35421e-12	9.63e-11	3.41723e-11	TNF/IL6/SMAD3/IL6R/PPARG/LTF/MAPK14/CEBPB/BMP6/PTCH1/SHH/CTNNB1/SPP1/NOTCH1/BMP2/COL1A1/VCAN/PTHLH/AKT1/CEBPA/ACVR1/PHB1/ALPL/ACHE/HSD17B4/MEN1/GSK3B/SFRP1/PTK2/JAG1/LEF1/CLTC/IARS1/HSPE1/EPHA2/PRKACA/SNRNP200/ALYREF/ILK/IFITM1/GABBR1/YAP1/RORB/FFAR4/ESRRA/CEBPD	46	BP
GO:0051054	positive regulation of DNA metabolic process	52/1159	301/18903	9.70851e-12	9.98e-11	3.54069e-11	TNF/IL4/TGFB1/IL6/HMGB1/TNFSF4/EGFR/PARP1/MAPK3/HSP90AA1/SRC/MAPK1/CTNNB1/TFRC/BAX/CDK2/CYP1B1/PRKCQ/SIRT1/MYC/AKT1/TNKS/PTPRC/NOX4/PRKCD/IGF1R/PRKDC/ATM/SMARCA4/NBN/PPARGC1A/ACTB/SMARCD2/BRD7/ERCC1/RUVBL1/CCT8/PDGFRB/MRE11/TP53BP1/KAT5/BRCA1/NEK2/CCT5/PTK2B/RAD51/MAP2K4/EREG/ATR/PAK3/CDK1/TNFSF13	52	BP
GO:0030336	negative regulation of cell migration	59/1159	368/18903	9.73737e-12	9.99e-11	3.54525e-11	TNF/IL4/TGFB1/IL33/CCL2/SERPINE1/HMOX1/MIF/NFE2L2/PPARG/CX3CR1/HMGB1/HDAC2/CXCL12/CDH1/DPP4/ADORA1/DUSP1/RHOA/ADORA3/HDAC1/PRKG1/CX3CL1/SHH/ABCC8/FOXO3/PTEN/ACVRL1/NOTCH1/LRP1/NRG1/CCL21/CYP1B1/AKT1/GJA1/CXCL13/DUSP10/TET1/PLCB1/CSNK2B/RAC1/DLC1/THBS1/DAG1/ZMYND8/SFRP1/APEX1/JAG1/DRD2/TPM1/ADIPOR1/SERPINF1/KLRK1/DUSP22/IFITM1/S1PR2/PPARD/CD74/DPEP1	59	BP
GO:0051279	regulation of release of sequestered calcium ion into cytosol	25/1159	82/18903	9.78123e-12	1e-10	3.55524e-11	NOS1/CXCL10/PDE4D/ITGB3/LYN/F2R/CX3CL1/BAX/GSTO1/BDKRB1/CACNA1C/F2/PDPK1/ABL1/CXCL11/SLC8A1/PTPN6/PRKACA/DIAPH1/DRD1/PTK2B/GPER1/SNCA/PLCG1/CALM1	25	BP
GO:0002755	MyD88-dependent toll-like receptor signaling pathway	14/1159	24/18903	1.08009e-11	1.1e-10	3.91275e-11	IRAK3/TLR4/TLR2/TLR9/IRF1/TLR1/TLR5/BTK/IRAK1/TRAF6/HSPD1/IRAK4/MAP3K7/IRAK2	14	BP
GO:0038095	Fc-epsilon receptor signaling pathway	14/1159	24/18903	1.08009e-11	1.1e-10	3.91275e-11	LYN/BTK/PLCG2/IKBKB/TRAF6/MAPK8/PRKCQ/MAP3K7/MAP3K1/MAPK10/SOS1/NR4A3/MAP2K4/PLCG1	14	BP
GO:0051339	regulation of lyase activity	24/1159	76/18903	1.09393e-11	1.11e-10	3.95625e-11	ADRB2/NOS2/NOS3/NOS1/EDNRA/CRHR1/CCR2/LTB4R2/ADORA3/CALCA/ORAI1/ADRB1/EDNRB/CACNA1C/GLP1R/RAF1/PARK7/DRD2/GALR1/AVPR2/DRD1/DRD3/GABBR1/RXFP1	24	BP
GO:0007586	digestion	33/1159	139/18903	1.10031e-11	1.12e-10	3.97272e-11	TLR4/NOD2/TLR9/CHRM3/TRPV1/CHIT1/TACR1/CHRM1/VDR/SERPINA3/APOA1/NR1H2/ADRA2A/KCNQ1/AQP1/OPRK1/CCK/SLC5A1/PPARGC1A/SLC26A6/RBP4/FABP1/SGK1/WNK1/PRSS1/SLC46A1/NPC1/SCARB1/DRD3/NR1H3/CCKBR/AKR1C1/CHRM5	33	BP
GO:0007589	body fluid secretion	26/1159	89/18903	1.12006e-11	1.14e-10	4.03729e-11	CHRM3/TACR1/CREB1/XDH/ADORA1/CHRM1/VDR/VEGFA/CCND1/CAV1/ERBB4/ANO1/HIF1A/P2RY2/NR1H2/ATP7A/AQP1/DDR1/OPRK1/SCNN1B/WNK1/TRAF3IP2/NME1/XBP1/NR1H3/NPR1	26	BP
GO:0045429	positive regulation of nitric oxide biosynthetic process	18/1159	42/18903	1.14034e-11	1.16e-10	4.10356e-11	TNF/TLR4/IL1B/PTGS2/SMAD3/TRPV1/MMP8/HSP90AA1/CLEC7A/SOD2/JAK2/CLU/AKT1/AGT/INSR/PTK2B/KLRK1/DDAH1	18	BP
GO:0051146	striated muscle cell differentiation	51/1159	293/18903	1.1531e-11	1.17e-10	4.14259e-11	IL4R/IL4/TGFB1/NOS1/CXCL10/MAPK14/ITGB1/VEGFA/CASP3/SHH/MTOR/G6PD/GPX1/NOTCH1/BMP2/NRG1/AKT1/DOCK1/DKK1/AGT/ACVR1/SIX1/NOX4/ZMPSTE24/CFLAR/MMP14/PPARA/SMYD3/PLEC/SLC8A1/SDC1/RYR1/EHD1/RARA/MYH7/PDGFRB/CD81/TPM1/CAPN2/CACNA1H/YBX1/RARB/ADRA1A/XBP1/KRAS/FLOT1/PIEZO1/MAP2K4/SORT1/CDK1/CSRP1	51	BP
GO:0002294	CD4-positive, alpha-beta T cell differentiation involved in immune response	23/1159	70/18903	1.16651e-11	1.18e-10	4.18382e-11	IL12B/IL4R/IL4/IL6/IL18/IL6R/NLRP3/CD86/IL12RB1/CD80/HMGB1/TNFSF4/CCL19/RORA/MTOR/RORC/JAK3/MALT1/RIPK2/BCL6/ATP7A/RARA/LEF1	23	BP
GO:0019229	regulation of vasoconstriction	22/1159	64/18903	1.17186e-11	1.18e-10	4.19607e-11	CYSLTR1/PTGS2/CHRM3/TACR1/MMP2/ACE2/RHOA/F2R/CD38/CAV1/CASR/AGTR1/FGG/AGT/ABL1/ADRA2A/ECE1/TBXAS1/P2RX1/ADRA1A/AVPR2/ADRA2C	22	BP
GO:0032368	regulation of lipid transport	35/1159	155/18903	1.21554e-11	1.22e-10	4.34529e-11	IL1B/IL1A/MIF/PPARG/ITGB3/CRHR1/NFKBIA/NFKB1/PON1/BMP6/PTCH1/SHH/SPP1/CAV1/APOA1/ABCA1/PTGES/LRP1/ANXA2/SIRT1/AGTR1/AKT1/CRY1/CRY2/AGT/NR1H2/PRKCD/PPARA/REN/THBS1/CYP4F2/GALR1/CES1/PCSK9/NR1H3	35	BP
GO:0014706	striated muscle tissue development	47/1159	257/18903	1.25702e-11	1.26e-10	4.48615e-11	TGFB1/SMAD3/EDNRA/CREB1/MAPK14/ITGB1/VEGFA/TGFBR1/NPPA/SHH/MTOR/G6PD/PTEN/RUNX1/NOTCH1/IFRD1/ERBB4/BMP2/NRG1/S1PR1/GJA1/DKK1/AGT/ACVR1/NOX4/ABL1/ZMPSTE24/PRMT1/PPARA/PLEC/RBP4/ALDH1A2/SLC8A1/RARA/MYH7/PDGFRB/LEF1/PTCD2/FOXC2/TPM1/RARB/ADRA1A/CDC42/MAP2K4/PIM1/YAP1/CDK1	47	BP
GO:0001818	negative regulation of cytokine production	59/1159	371/18903	1.37109e-11	1.38e-10	4.88524e-11	TNF/IL12B/IL4/IRAK3/TGFB1/TLR4/IL6/IL33/GSTP1/NOD2/TLR9/HMOX1/NLRP3/ARG1/CX3CR1/F2RL1/SLC11A1/HMGB1/TNFSF4/NFKB1/ANGPT1/LTF/IDO1/BTK/CCR7/MMP8/CX3CL1/JAK3/IL37/APOA1/DDIT3/VSIR/F2/ARRB1/CD274/IL36RN/BCL6/PTPRC/GBA1/MC1R/CR1/PDCD1LG2/RAC1/PPARA/IFNA2/THBS1/ITCH/PTPN6/RARA/LEF1/KAT5/CDH3/EPHA2/INPP5D/RPS6KA5/OAS1/CMKLR1/FFAR4/FFAR1	59	BP
GO:0007259	receptor signaling pathway via JAK-STAT	37/1159	172/18903	1.46379e-11	1.47e-10	5.20694e-11	TNF/IL12B/IL4/CCL5/IL6/IL18/CSF2/CCL2/JAK1/IL6R/STAT1/LYN/HDAC2/CCR2/F2R/FYN/TNFRSF1A/JAK2/JAK3/IL10RB/CAV1/NOTCH1/ERBB4/CYP1B1/IFNAR1/F2/CSF1R/AGT/PTPRC/KIT/PKD1/IFNA2/HES1/IFNA6/ADIPOR1/OSBP/PTK2B	37	BP
GO:0006919	activation of cysteine-type endopeptidase activity involved in apoptotic process	24/1159	77/18903	1.49785e-11	1.5e-10	5.31068e-11	TNF/SMAD3/NOD1/PPARG/CASP8/XDH/F2R/LCK/JAK2/BAX/HSPD1/F3/NLRP1/ATP2A3/CFLAR/DLC1/BID/P2RX1/CASP9/SENP1/HSPE1/BAK1/MAPT/SNCA	24	BP
GO:1903036	positive regulation of response to wounding	24/1159	77/18903	1.49785e-11	1.5e-10	5.31068e-11	SERPINE1/NFE2L2/CXCR4/ITGB1/F2R/CLEC7A/THBD/MTOR/F3/F2/ATP7A/ADRA2A/IGF1R/FLNA/DUOX1/HBEGF/THBS1/PTK2/PRDX2/FOXC2/XBP1/HRAS/F12/HPSE	24	BP
GO:0018958	phenol-containing compound metabolic process	29/1159	111/18903	1.57315e-11	1.57e-10	5.55943e-11	ITGB2/EDNRA/ITGAM/ALDH2/SULT1A1/PNMT/ATP7A/MC1R/MAOB/DUOX1/CTSB/CTSK/PARK7/HPRT1/TYRP1/DRD2/PAH/CDH3/SLC7A11/TPH1/EPAS1/DRD1/GRIN2A/DRD3/SRD5A1/SNCA/MAOA/GPR37/NPR1	29	BP
GO:1901222	regulation of NIK/NF-kappaB signaling	29/1159	111/18903	1.57315e-11	1.57e-10	5.55943e-11	TNF/IL12B/CD14/TLR4/IL1B/TLR2/IL18/NOD2/TLR9/NOD1/NLRP3/CD86/TLR3/NFKBIA/EGFR/RHOA/MMP8/IRAK1/CCL19/TRAF6/EP300/NR3C2/RELA/PHB1/PRDX1/ADIPOR1/BIRC2/ILK/SPHK1	29	BP
GO:0002287	alpha-beta T cell activation involved in immune response	23/1159	71/18903	1.62629e-11	1.61e-10	5.72853e-11	IL12B/IL4R/IL4/IL6/IL18/IL6R/NLRP3/CD86/IL12RB1/CD80/HMGB1/TNFSF4/CCL19/RORA/MTOR/RORC/JAK3/MALT1/RIPK2/BCL6/ATP7A/RARA/LEF1	23	BP
GO:0002293	alpha-beta T cell differentiation involved in immune response	23/1159	71/18903	1.62629e-11	1.61e-10	5.72853e-11	IL12B/IL4R/IL4/IL6/IL18/IL6R/NLRP3/CD86/IL12RB1/CD80/HMGB1/TNFSF4/CCL19/RORA/MTOR/RORC/JAK3/MALT1/RIPK2/BCL6/ATP7A/RARA/LEF1	23	BP
GO:0061028	establishment of endothelial barrier	19/1159	48/18903	1.66967e-11	1.65e-10	5.84755e-11	TNF/IL1B/ICAM1/EDNRA/PDE4D/F2RL1/VEGFA/TNFRSF1A/IKBKB/RAPGEF3/EDNRB/TJP1/PLCB1/S1PR3/ROCK2/ROCK1/S1PR2/HPSE/RAP1A	19	BP
GO:0048247	lymphocyte chemotaxis	22/1159	65/18903	1.66972e-11	1.65e-10	5.84755e-11	CCL5/CCL2/CCL17/CCL24/CCL26/CCL22/CXCL10/CCR2/CCL19/CX3CL1/CCL20/ADAM17/CCL21/CXCL13/CCL15/CXCL11/OXSR1/PLEC/SLC12A2/WNK1/PTK2B/KLRK1	22	BP
GO:0080164	regulation of nitric oxide metabolic process	22/1159	65/18903	1.66972e-11	1.65e-10	5.84755e-11	TNF/TLR4/IL1B/PTGS2/SMAD3/CX3CR1/TRPV1/MMP8/HSP90AA1/CLEC7A/SOD2/JAK2/CAV1/CLU/AKT1/AGT/RAC1/INSR/ROCK2/PTK2B/KLRK1/DDAH1	22	BP
GO:0071695	anatomical structure maturation	46/1159	250/18903	1.67087e-11	1.65e-10	5.84755e-11	EDNRA/C3/PPARG/CX3CR1/MMP2/LTF/CCR6/BTK/RHOA/VEGFA/CLEC7A/CCL19/CX3CL1/CTNNB1/G6PD/FOXO3/ACVRL1/DDIT3/BMP2/EBP/HIF1A/KDR/EDNRB/CCL21/CEBPA/FGG/AKR1B1/S1PR1/GBA1/ANG/REN/DAG1/SLC26A6/ALDH1A2/RYR1/HES1/CDH3/LRRK2/PRKACA/AURKA/EPAS1/PTK2B/CDC25B/EREG/PGR/KCNE1	46	BP
GO:0006941	striated muscle contraction	38/1159	181/18903	1.68989e-11	1.66e-10	5.90457e-11	TNF/NOS1/PDE4D/ADORA1/CXCR4/CCN2/ACE2/HSP90AA1/PDE4B/ATP2A2/NPPA/MTOR/CAV1/GSTO1/SCN4A/CACNA1C/GJA1/FLNA/KCNQ1/NR4A1/CHRNA1/SLC8A1/MYH7/ALDOA/ATP1A1/CACNA2D1/PDE5A/ATP2A1/TPM1/PIK3CA/ADRA1A/RPS6KB1/PRKACA/GRK2/SCN1A/KCNJ5/CALM1/KCNE1	38	BP
GO:0038127	ERBB signaling pathway	31/1159	126/18903	1.72232e-11	1.69e-10	6.0082e-11	TGFB1/EGFR/ADORA1/SRC/MAPK1/ADAM17/ERBB2/ERBB4/GAB1/NRG1/TGFA/AKT1/PDPK1/AGT/PIK3C2A/ABL1/ADRA2A/STUB1/CDH13/NCF1/HBEGF/PTK2/SOS1/PIK3CA/SHC1/PTK2B/EREG/ITGA1/GRB2/GPER1/PLCG1	31	BP
GO:0007189	adenylate cyclase-activating G protein-coupled receptor signaling pathway	35/1159	157/18903	1.79009e-11	1.76e-10	6.23458e-11	ADRB2/CXCL10/PDE4D/CRHR1/PRKCA/OPRM1/PDE4B/CALCA/GNB1/MC4R/ABCA1/ADRB1/PTHLH/S1PR1/GLP1R/RAMP1/MC1R/ADRA2A/CNR2/CXCL11/CNR1/GCG/S1PR3/DRD2/GALR1/ADRA1A/DRD1/ADCY1/DRD3/ADGRL4/S1PR2/ADGRG6/GPER1/RXFP1/ADRA2C	35	BP
GO:2000117	negative regulation of cysteine-type endopeptidase activity	26/1159	91/18903	1.9583e-11	1.92e-10	6.80945e-11	TNF/PTGS2/LTF/VEGFA/SRC/GPX1/RPS6KA3/BIRC3/CD44/XIAP/AKT1/RPS6KA1/FNIP1/PRDX5/RAF1/AQP1/NR4A1/THBS1/FABP1/PARK7/SFN/DNAJB6/BIRC2/DHCR24/SNCA/DPEP1	26	BP
GO:0006163	purine nucleotide metabolic process	69/1159	476/18903	2.0289e-11	1.98e-10	7.04365e-11	IL4/TGFB1/NOS2/NOS3/NOS1/PDE4D/XDH/PARP1/RHOA/PDE4B/RORA/NPPA/ENPP1/MTOR/EP300/HIF1A/ENO1/HSPA1A/PRKAA2/PKM/SULT1A1/PTHLH/PPARA/NT5E/HSPA8/PGK1/PPARGC1A/HSD17B4/HMGCR/INSR/SAMHD1/AMPD1/SULT2B1/ELOVL1/PFKM/ARNT/MYH7/HPRT1/PRPS1/ALDOA/PDE7A/HINT1/NUDT3/PDE5A/RAN/NME1/PKLR/SPHK2/LRRK2/HK1/DGAT1/MTHFD1/PFKL/ATP6V1B1/EPHA2/IMPDH1/NMNAT1/PPT1/SLC25A1/ADCY1/ACACA/FBP1/PRKAA1/OPA1/PANK1/DNM1L/SNCA/ADK/NP…	69	BP
GO:1902175	regulation of oxidative stress-induced intrinsic apoptotic signaling pathway	15/1159	29/18903	2.04574e-11	2e-10	7.09076e-11	NFE2L2/PARP1/SOD2/SOD1/GPX1/HSPB1/HIF1A/SIRT1/AKT1/VNN1/NOX1/PARK7/TRAP1/PPIA/MCL1	15	BP
GO:0007252	I-kappaB phosphorylation	13/1159	21/18903	2.07934e-11	2.03e-10	7.19568e-11	TNF/TLR4/TLR2/TLR9/CX3CR1/TLR3/CHUK/CX3CL1/PLCG2/IKBKB/AKT1/MAP3K7/IKBKE	13	BP
GO:0010883	regulation of lipid storage	20/1159	54/18903	2.08299e-11	2.03e-10	7.19682e-11	TNF/IL6/C3/PPARG/ITGB3/NFKBIA/NFKB1/ABHD5/ABCA1/SIRT1/NR1H2/PPARA/EHD1/CES1/SCARB1/IKBKE/PNPLA2/MSR1/NR1H3/PPARD	20	BP
GO:0051960	regulation of nervous system development	67/1159	456/18903	2.17622e-11	2.12e-10	7.50698e-11	TNF/TGFB1/IL6/IL33/IL1B/TLR2/LTA/CX3CR1/LYN/HDAC2/CXCL12/CDH1/CXCR4/ITGB1/MME/VEGFA/HDAC1/OPRM1/CX3CL1/SHH/LIG4/CTNNB1/MTOR/SPP1/ABCC8/PTEN/CTSC/TP53/NOTCH1/IFRD1/BMP2/IL1RAP/HIF1A/NR1D1/ANXA2/AKT1/F2/DKK1/CTNNA1/DUSP10/KIT/TRPV2/NTRK1/MAP2K1/DAG1/GRM5/RARA/LEF1/HES1/PRUNE1/DRD2/KRAS/E2F1/LIMK1/SERPINF1/MAPT/PRKCH/EPHB1/DRD3/SLC7A5/LIN28A/TPBG/YAP1/GPER1/MAP2K2/PAK3/TRPC5	67	BP
GO:1903320	regulation of protein modification by small protein conjugation or removal	46/1159	252/18903	2.22104e-11	2.16e-10	7.6494e-11	NOD2/ANGPT1/HSP90AA1/FYN/TGFBR1/CTNNB1/TRAF6/PTEN/CAV1/HIF1A/HSPA1A/BIRC3/XIAP/MALT1/RIPK2/AKT1/PIN1/ARRB1/CRY1/RELA/ABL1/EGR1/STUB1/HDAC3/SKP2/PLK1/ITCH/PARK7/ARNT/FZR1/PEF1/BRCA1/HSPA5/HUWE1/DNAJA1/AXIN1/LRRK2/OTUB1/BIRC2/SQSTM1/EPAS1/LIMK1/HDAC8/PPIA/BMI1/SPHK1	46	BP
GO:0062149	detection of stimulus involved in sensory perception of pain	14/1159	25/18903	2.31619e-11	2.24e-10	7.96445e-11	TNF/TRPA1/TRPV1/CXCL12/ADORA1/CXCR4/FYN/CALCA/ANO1/NTRK1/ASIC3/KCNA1/EPHB1/SCN1A	14	BP
GO:1900180	regulation of protein localization to nucleus	32/1159	135/18903	2.35879e-11	2.28e-10	8.09806e-11	TGFB1/PTGS2/SMAD3/ANGPT1/CDH1/MAPK14/PARP1/HSP90AA1/FYN/SRC/JAK2/SHH/MAVS/TFRC/AKT1/PIN1/F2/DCLK1/CTNNA1/PRKCD/FLNA/HDAC3/GSK3B/PLK1/BAG3/PARK7/CCT8/PIK3R1/RAN/CCT5/YAP1/CDK1	32	BP
GO:0008625	extrinsic apoptotic signaling pathway via death domain receptors	25/1159	85/18903	2.36303e-11	2.28e-10	8.09978e-11	TNF/ICAM1/NOS3/SERPINE1/HMOX1/CASP8/TNFRSF1A/PTEN/GPX1/BAX/FGG/TNFRSF10A/CFLAR/RAF1/THBS1/BID/GSK3B/BAG3/SFRP1/PARK7/BCL2L1/PIK3R1/BRCA1/STK4/SORT1	25	BP
GO:0030073	insulin secretion	38/1159	183/18903	2.39247e-11	2.31e-10	8.18774e-11	TNF/ALOX5/CCL5/IL6/IL1B/NOS2/IL1RN/SMAD2/CD38/KCNJ11/JAK2/ABCC8/CASR/ANO1/MC4R/HIF1A/NR1D1/ADRA2A/RAF1/CNR1/TRPM2/SFRP1/RBP4/PARK7/GCG/PFKM/DRD2/SLC16A1/SSTR5/HNF4A/PFKL/OSBP/TCF7L2/GPR68/IRS1/PPARD/GPER1/FFAR1	38	BP
GO:0031281	positive regulation of cyclase activity	19/1159	49/18903	2.57124e-11	2.47e-10	8.75805e-11	ADRB2/NOS2/NOS3/NOS1/EDNRA/CRHR1/MAPK14/MAPK3/ADORA3/CALCA/ORAI1/MAPK8/ADRB1/CACNA1C/GLP1R/RAF1/AVPR2/DRD1/RXFP1	19	BP
GO:0035094	response to nicotine	19/1159	49/18903	2.57124e-11	2.47e-10	8.75805e-11	TNF/VCAM1/HMOX1/HDAC2/NFKB1/TACR1/MMP2/CASP3/MAPK1/GPX1/RELA/IGF1R/KCNQ1/PPARA/NTRK1/CNR1/DRD2/SLC7A11/GABBR1	19	BP
GO:1904894	positive regulation of receptor signaling pathway via STAT	19/1159	49/18903	2.57124e-11	2.47e-10	8.75805e-11	TNF/IL12B/IL4/TGFB1/CCL5/IL6/IL6R/F2R/JAK2/IL10RB/NOTCH1/ERBB4/CYP1B1/F2/AGT/KIT/HES1/ADIPOR1/PTK2B	19	BP
GO:1903531	negative regulation of secretion by cell	34/1159	151/18903	2.59346e-11	2.49e-10	8.81987e-11	IL12B/IL1B/HMOX1/CCR2/ADORA1/F2R/OPRM1/HRH3/KCNJ11/TNFRSF1A/ABCC8/NOTCH1/GJA1/CRY1/CRY2/ADRA2A/MAOB/OPRK1/CNR1/HMGCR/SFRP1/P2RY1/ASIC1/VPS4B/DRD2/PFKL/DRD3/GABBR1/IRS1/NR1H3/FFAR4/SNCA/RAP1A/ADRA2C	34	BP
GO:0031099	regeneration	39/1159	192/18903	2.65945e-11	2.54e-10	9.0301e-11	TNF/IL6/HMOX1/JUN/MMP2/CXCL12/CEBPB/PTCH1/JAK2/SPP1/PTEN/RUNX1/CCND1/GPX1/NOTCH1/IFRD1/ERBB4/CTNNA1/DUSP10/IGF1R/CFLAR/FLNA/CDKN1A/MAP2K1/DAG1/CD81/CCNA2/BAK1/AURKA/LARGE1/UGT1A1/NR4A3/SLC7A5/YAP1/PPARD/MAP2K2/CDK1/PGF/LCP1	39	BP
GO:0050767	regulation of neurogenesis	59/1159	377/18903	2.68152e-11	2.56e-10	9.09081e-11	TNF/TGFB1/IL6/IL33/IL1B/TLR2/LTA/CX3CR1/LYN/HDAC2/CXCL12/CDH1/CXCR4/ITGB1/MME/VEGFA/HDAC1/OPRM1/CX3CL1/SHH/LIG4/CTNNB1/MTOR/SPP1/ABCC8/PTEN/TP53/NOTCH1/IFRD1/BMP2/HIF1A/NR1D1/ANXA2/F2/CTNNA1/DUSP10/KIT/TRPV2/MAP2K1/DAG1/GRM5/LEF1/HES1/PRUNE1/DRD2/KRAS/E2F1/LIMK1/SERPINF1/MAPT/PRKCH/DRD3/SLC7A5/LIN28A/YAP1/GPER1/MAP2K2/PAK3/TRPC5	59	BP
GO:1904407	positive regulation of nitric oxide metabolic process	18/1159	44/18903	2.95131e-11	2.81e-10	9.98177e-11	TNF/TLR4/IL1B/PTGS2/SMAD3/TRPV1/MMP8/HSP90AA1/CLEC7A/SOD2/JAK2/CLU/AKT1/AGT/INSR/PTK2B/KLRK1/DDAH1	18	BP
GO:1901617	organic hydroxy compound biosynthetic process	45/1159	245/18903	2.95355e-11	2.81e-10	9.98177e-11	TNF/ALOX15/NFKB1/ALDH2/CYP3A4/SOD1/BMP6/CYP27B1/PLCG2/G6PD/AKR1C3/APOA1/BMP2/EBP/NR1D1/PRKAA2/ADCYAP1R1/SIRT1/PNMT/GBA1/ATP7A/MC1R/HMGCR/PARK7/P2RY1/SPTLC1/TYRP1/PAH/CDH3/CACNA1H/SPHK2/SLC7A11/TPH1/DHCR24/CES1/OSBP/PTK2B/PRKAA1/HSD17B1/SPHK1/FGF1/GPER1/SNCA/FDPS/GPR37	45	BP
GO:0048568	embryonic organ development	66/1159	449/18903	3.02251e-11	2.87e-10	1.01989e-10	TNF/CXCL8/TGFB1/CSF2/SMAD3/SMAD2/EDNRA/CASP8/EGFR/MAPK3/VEGFA/CEBPB/TGFBR1/SOD1/PTCH1/MAPK1/SHH/ST14/CTNNB1/TP53/NOTCH1/HIF1A/KDR/NCOA1/COL2A1/AKT1/CEBPA/HYAL1/ACVR1/KIT/SIX1/DVL1/KCNQ1/PKD1/MMP14/ECE1/MAP2K1/RBP4/ALDH1A2/PDGFA/PRDM1/RARA/KMT2A/ERCC1/ARNT/LEF1/HES1/FOXC2/DNAJB6/RARB/STK4/MTHFD1/ATP6V1B1/EPHA2/SETD2/CDC42/EPAS1/DVL2/TEAD1/BPTF/MTHFD1L/SLC44A4/BMI1/GRB2/YAP1/ZEB1	66	BP
GO:0097242	amyloid-beta clearance	17/1159	39/18903	3.06976e-11	2.91e-10	1.03423e-10	TNF/IL4/ITGB2/C5AR1/C3/ITGAM/MME/HDAC1/LRP1/CLU/IGF1R/HMGCR/INSR/CLTC/PICALM/ROCK1/MSR1	17	BP
GO:0006584	catecholamine metabolic process	20/1159	55/18903	3.08587e-11	2.92e-10	1.03483e-10	ITGB2/EDNRA/ITGAM/ALDH2/SULT1A1/PNMT/ATP7A/MAOB/PARK7/HPRT1/DRD2/PAH/EPAS1/DRD1/GRIN2A/DRD3/SNCA/MAOA/GPR37/NPR1	20	BP
GO:0009712	catechol-containing compound metabolic process	20/1159	55/18903	3.08587e-11	2.92e-10	1.03483e-10	ITGB2/EDNRA/ITGAM/ALDH2/SULT1A1/PNMT/ATP7A/MAOB/PARK7/HPRT1/DRD2/PAH/EPAS1/DRD1/GRIN2A/DRD3/SNCA/MAOA/GPR37/NPR1	20	BP
GO:0043525	positive regulation of neuron apoptotic process	20/1159	55/18903	3.08587e-11	2.92e-10	1.03483e-10	TNF/NR3C1/NQO1/ITGAM/RHOA/CASP3/CTNNB1/FOXO3/TP53/DDIT3/BAX/ABL1/ATM/CASP9/BCL2L11/MAP2K4/PCSK9/ITGA1/MCL1/PAK3	20	BP
GO:0033273	response to vitamin	25/1159	86/18903	3.13967e-11	2.96e-10	1.05124e-10	PTGS2/IL1A/ARG1/CXCL10/VDR/SOD2/CYP27B1/CYP1A1/SPP1/CCND1/CASR/GPX1/COL1A1/CBS/BECN1/IGF1R/CYP26A1/ALPL/SFRP1/SLC34A1/ALDH1A2/RARA/BCHE/PIM1/PPARD	25	BP
GO:0040013	negative regulation of locomotion	63/1159	419/18903	3.25103e-11	3.06e-10	1.08685e-10	TNF/IL4/TGFB1/IL33/CCL2/SERPINE1/HMOX1/MIF/NFE2L2/PPARG/CX3CR1/HMGB1/HDAC2/CXCL12/CDH1/DPP4/ADORA1/DUSP1/RHOA/ADORA3/HDAC1/PRKG1/CX3CL1/SHH/ABCC8/FOXO3/PTEN/ACVRL1/NOTCH1/LRP1/NRG1/CCL21/CYP1B1/AKT1/PIN1/GJA1/CXCL13/CTNNA1/DUSP10/TET1/PLCB1/CSNK2B/RAC1/DLC1/THBS1/DAG1/ZMYND8/SFRP1/GRM5/APEX1/JAG1/DRD2/TPM1/ADIPOR1/ST6GAL1/SERPINF1/KLRK1/DUSP22/IFITM1/S1PR2/PPARD/CD74/DPEP1	63	BP
GO:0030888	regulation of B cell proliferation	22/1159	67/18903	3.3132e-11	3.12e-10	1.10592e-10	IL4/TLR4/TLR9/MIF/LYN/BTK/AHR/TNFRSF4/TNFSF13B/CD38/CASP3/PTEN/TFRC/BCL6/PTPRC/ATM/CDKN1A/BST1/CD81/INPP5D/BMI1/CD74	22	BP
GO:1902893	regulation of miRNA transcription	21/1159	61/18903	3.3285e-11	3.13e-10	1.10932e-10	TNF/TGFB1/NR3C1/SMAD3/JUN/PPARG/FOS/FOXO3/TP53/BMP2/HIF1A/MYC/NR1H2/RELA/EGR1/PPARA/SMARCA4/POU5F1/RARA/TEAD1/PPARD	21	BP
GO:0098739	import across plasma membrane	40/1159	202/18903	3.39684e-11	3.18e-10	1.13036e-10	TNF/ARG1/TRPV1/ITGB1/ACE2/FYN/KCNJ11/ABCC8/ATP4A/SLC22A4/SCNN1A/MS4A1/CACNA1C/AKT1/AGT/KCNQ1/GRM1/SLC2A1/SCNN1G/TRPV2/SLC1A5/KCNJ1/SLC5A1/THBS1/TRPM2/SLC12A2/P2RX1/SLC34A1/SLC8A1/SCNN1B/WNK1/ATP1A1/CACNA2D1/SLC7A11/SLC12A1/SLC46A1/TRPV5/SLC7A5/SLC27A1/KCNJ5	40	BP
GO:0043534	blood vessel endothelial cell migration	37/1159	177/18903	3.56313e-11	3.34e-10	1.18387e-10	TNF/TGFB1/PTGS2/NOS3/HMOX1/NFE2L2/PPARG/HMGB1/ANGPT1/PRKCA/ITGB1/RHOA/VEGFA/FGFR1/ADAM17/APOA1/GPX1/ACVRL1/NOTCH1/HSPB1/HIF1A/KDR/CYP1B1/SIRT1/AKT1/PDPK1/PIK3C2A/ABL1/CSNK2B/NR4A1/THBS1/FOXC2/EPHA2/PTK2B/SCARB1/PLCG1/CIB1	37	BP
GO:0006692	prostanoid metabolic process	19/1159	50/18903	3.91014e-11	3.65e-10	1.2952e-10	GSTM1/GSTP1/IL1B/PTGS2/PTGS1/MIF/TNFRSF1A/GSTA1/AKR1C3/PTGES/SIRT1/AKR1B1/TBXAS1/CBR1/ATP6V1B1/CES2/HPGD/CD74/AKR1C1	19	BP
GO:0006693	prostaglandin metabolic process	19/1159	50/18903	3.91014e-11	3.65e-10	1.2952e-10	GSTM1/GSTP1/IL1B/PTGS2/PTGS1/MIF/TNFRSF1A/GSTA1/AKR1C3/PTGES/SIRT1/AKR1B1/TBXAS1/CBR1/ATP6V1B1/CES2/HPGD/CD74/AKR1C1	19	BP
GO:2000628	regulation of miRNA metabolic process	23/1159	74/18903	4.23875e-11	3.95e-10	1.4019e-10	TNF/TGFB1/NR3C1/SMAD3/JUN/PPARG/NFKB1/FOS/FOXO3/TP53/BMP2/HIF1A/MYC/NR1H2/RELA/EGR1/PPARA/SMARCA4/POU5F1/RARA/TEAD1/PPARD/HRAS	23	BP
GO:0034308	primary alcohol metabolic process	28/1159	108/18903	4.29184e-11	3.99e-10	1.4173e-10	ALDH2/CYP3A4/CYP1A2/HSD11B2/BMP6/CYP1A1/AKR1C3/ADH5/BMP2/EDNRB/SULT1A1/CYP1B1/AKR1B1/CYP2C8/ADH1C/RBP4/ALDH1A2/PARK7/SCNN1B/HAO1/ADH1B/CACNA1H/DGAT1/PNPLA2/TTR/AKR1A1/ALDH1B1/AKR1C1	28	BP
GO:0010594	regulation of endothelial cell migration	43/1159	230/18903	4.47907e-11	4.16e-10	1.47688e-10	TNF/TGFB1/PTGS2/NOS3/HMOX1/NFE2L2/PPARG/ITGB3/HMGB1/ANGPT1/PRKCA/RHOA/VEGFA/FGFR1/ADAM17/ACVRL1/NOTCH1/HSPB1/HIF1A/KDR/SIRT1/AKT1/PDPK1/CXCL13/AGT/PIK3C2A/ABL1/CSNK2B/RAC1/TEK/THBS1/PTK2/BMPER/FOXC2/EPHA2/ROCK2/SERPINF1/FGF4/PTK2B/SCARB1/FGF1/PLCG1/CIB1	43	BP
GO:0005996	monosaccharide metabolic process	45/1159	248/18903	4.51468e-11	4.19e-10	1.48636e-10	TNF/NR3C1/MAPK14/SRC/GPT/KCNJ11/RORA/G6PD/RORC/TP53/FUT2/EP300/GSTO1/ENO1/PKM/SIRT1/AKT1/AKR1B1/GLB1/CRY1/ZMPSTE24/KCNQ1/SLC2A1/PPARA/PGK1/G6PC1/PPARGC1A/RBP4/INSR/MAN2B1/GCG/PFKM/ALDOA/PIK3CA/ADIPOR1/HK1/PFKL/SLC25A1/FUCA1/FBP1/PRKAA1/OAS1/IRS1/PPARD/AKR1A1	45	BP
GO:0045761	regulation of adenylate cyclase activity	20/1159	56/18903	4.52547e-11	4.19e-10	1.48765e-10	ADRB2/EDNRA/CRHR1/CCR2/LTB4R2/ADORA3/CALCA/ORAI1/ADRB1/EDNRB/CACNA1C/GLP1R/RAF1/DRD2/GALR1/AVPR2/DRD1/DRD3/GABBR1/RXFP1	20	BP
GO:0043620	regulation of DNA-templated transcription in response to stress	18/1159	45/18903	4.63827e-11	4.28e-10	1.51782e-10	HMOX1/NFE2L2/JUN/VEGFA/CEBPB/MUC1/TP53/DDIT3/HIF1A/RPS6KA3/RPS6KA1/RELA/EGR1/CHEK1/BAG3/ARNT/HSPA5/EPAS1	18	BP
GO:0046427	positive regulation of receptor signaling pathway via JAK-STAT	18/1159	45/18903	4.63827e-11	4.28e-10	1.51782e-10	TNF/IL12B/IL4/CCL5/IL6/IL6R/F2R/JAK2/IL10RB/NOTCH1/ERBB4/CYP1B1/F2/AGT/KIT/HES1/ADIPOR1/PTK2B	18	BP
GO:1904646	cellular response to amyloid-beta	18/1159	45/18903	4.63827e-11	4.28e-10	1.51782e-10	ADRB2/TNF/TLR4/ICAM1/VCAM1/PARP1/FYN/FOXO3/ABCC1/FPR2/LRP1/GJA1/IGF1R/CASP4/GSK3B/GRM5/CACNA2D1/BCL2L11	18	BP
GO:0051607	defense response to virus	51/1159	304/18903	4.68063e-11	4.31e-10	1.52937e-10	IL12B/IL4/IL6/IL33/IL1B/TLR2/TLR9/MBL2/IRF1/CXCL10/IL12RB1/TLR3/IFNGR2/F2RL1/STAT1/HSP90AA1/CASP1/MAVS/IFIH1/IL10RB/APOBEC3C/BIRC3/NLRP1/BECN1/DDX1/PTPRC/RELA/ZMPSTE24/PHB1/IFNA2/SKP2/ATG7/USP15/OPRK1/PRF1/ITCH/SAMHD1/TBKBP1/BCL2L1/TRAF3IP2/IFNA6/BIRC2/SETD2/TBK1/ZMYND11/CGAS/IKBKE/APOBEC3B/SENP7/OAS1/IFITM1	51	BP
GO:0043030	regulation of macrophage activation	21/1159	62/18903	4.74482e-11	4.35e-10	1.54336e-10	IL4R/IL4/TLR4/IL6/IL33/MIF/MMP8/RORA/CX3CL1/CTSC/NR1D1/HSPD1/CEBPA/PTPRC/ATM/THBS1/LRRK2/SPHK1/NR1H3/SNCA/CD74	21	BP
GO:0061614	miRNA transcription	21/1159	62/18903	4.74482e-11	4.35e-10	1.54336e-10	TNF/TGFB1/NR3C1/SMAD3/JUN/PPARG/FOS/FOXO3/TP53/BMP2/HIF1A/MYC/NR1H2/RELA/EGR1/PPARA/SMARCA4/POU5F1/RARA/TEAD1/PPARD	21	BP
GO:0090303	positive regulation of wound healing	21/1159	62/18903	4.74482e-11	4.35e-10	1.54336e-10	SERPINE1/NFE2L2/CXCR4/ITGB1/F2R/CLEC7A/THBD/MTOR/F3/F2/ADRA2A/DUOX1/HBEGF/THBS1/PTK2/PRDX2/FOXC2/XBP1/HRAS/F12/HPSE	21	BP
GO:0010888	negative regulation of lipid storage	13/1159	22/18903	4.79709e-11	4.38e-10	1.55569e-10	TNF/IL6/PPARG/ITGB3/NFKBIA/ABHD5/ABCA1/NR1H2/PPARA/CES1/PNPLA2/NR1H3/PPARD	13	BP
GO:1903209	positive regulation of oxidative stress-induced cell death	13/1159	22/18903	4.79709e-11	4.38e-10	1.55569e-10	TNF/TLR4/MMP3/SOD1/FOXO3/ABL1/VNN1/NOX1/TRPM2/PARK7/HDAC6/RIPK1/MCL1	13	BP
GO:0090276	regulation of peptide hormone secretion	37/1159	179/18903	5.03276e-11	4.59e-10	1.62968e-10	TNF/ALOX5/CCL5/IL6/IL1B/NOS2/CD38/KCNJ11/JAK2/ABCC8/CASR/ANO1/HIF1A/NR1D1/FGG/AIMP1/ADRA2A/CNR1/TRPM2/SFRP1/RBP4/GCG/PFKM/DRD2/SLC16A1/SSTR5/HNF4A/PFKL/OSBP/TCF7L2/GPR68/GABBR1/IRS1/PPARD/GPER1/FFAR4/FFAR1	37	BP
GO:0010595	positive regulation of endothelial cell migration	31/1159	131/18903	5.05574e-11	4.61e-10	1.63468e-10	TGFB1/PTGS2/NOS3/HMOX1/NFE2L2/ITGB3/HMGB1/ANGPT1/PRKCA/VEGFA/FGFR1/ADAM17/HSPB1/HIF1A/KDR/SIRT1/AKT1/PDPK1/AGT/PIK3C2A/ABL1/RAC1/TEK/THBS1/FOXC2/ROCK2/PTK2B/SCARB1/FGF1/PLCG1/CIB1	31	BP
GO:0003007	heart morphogenesis	46/1159	258/18903	5.10866e-11	4.65e-10	1.64932e-10	TGFB1/SMAD3/NOS3/EDNRA/JUN/VEGFA/TGFBR1/PTCH1/SHH/CTNNB1/MTOR/TP53/ACVRL1/NOTCH1/BMP2/HIF1A/NRG1/COL2A1/S1PR1/DKK1/ACVR1/SIX1/ZMPSTE24/MDM2/FLNA/DLC1/TEK/ADAMTS1/RBP4/PTK2/INSR/ALDH1A2/RYR1/SOS1/MYH7/JAG1/HES1/PTCD2/FOXC2/TPM1/CDC42/DVL2/ILK/PIM1/YAP1/ADGRG6	46	BP
GO:0051346	negative regulation of hydrolase activity	58/1159	373/18903	5.14631e-11	4.67e-10	1.65901e-10	TNF/PTGS2/NOS3/SERPINE1/NOS1/C3/LTF/SERPINA3/VEGFA/SRC/IKBKB/APOA1/GPX1/LRP1/RPS6KA3/BIRC3/CD44/XIAP/ANXA2/GZMA/AKT1/CRY2/AGT/RPS6KA1/ABL1/CR1/FNIP1/PRDX5/RAF1/NEIL1/PEBP1/AQP1/NR4A1/THBS1/CTSB/GSK3B/FABP1/PARK7/SERPINB8/WNK1/SERPINH1/SFN/DNAJB6/SPHK2/LRRK2/BIRC2/DHCR24/ROCK2/SERPINF1/KLRK1/SORT1/PICALM/PPP1R15A/ROCK1/HRAS/SNCA/DPEP1/SERPINA2	58	BP
GO:0015849	organic acid transport	53/1159	324/18903	5.17912e-11	4.7e-10	1.66643e-10	TNF/IL1B/IL1A/ARG1/MIF/PPARG/TRPV1/SLC11A1/ABCB1/ADORA1/ITGB1/ACE2/PLA2G2A/HRH3/ABCC1/SLC22A4/PTGES/SLC6A12/AKT1/GJA1/NMUR2/AGT/GRM1/SLC2A1/PPARA/SLC1A5/SLCO1B1/FABP4/THBS1/SLC12A2/SLC26A6/FABP1/CYP4F2/ABCG2/DRD2/SLC16A1/SLC7A11/RPS6KB1/SLC46A1/SLC25A1/ATP8B1/TRPC4/PRKAA1/DRD3/SLC7A5/SLCO1A2/SLC6A15/SLC27A1/GABBR1/PPARD/SNCA/ABCC2/AKR1C1	53	BP
GO:0050769	positive regulation of neurogenesis	43/1159	231/18903	5.18472e-11	4.7e-10	1.66643e-10	TNF/TGFB1/IL6/IL33/IL1B/TLR2/LTA/CX3CR1/LYN/HDAC2/CXCL12/CXCR4/ITGB1/MME/VEGFA/HDAC1/OPRM1/CX3CL1/SHH/LIG4/CTNNB1/MTOR/NOTCH1/BMP2/HIF1A/KIT/TRPV2/MAP2K1/DAG1/GRM5/HES1/DRD2/KRAS/E2F1/LIMK1/SERPINF1/MAPT/PRKCH/SLC7A5/GPER1/MAP2K2/PAK3/TRPC5	43	BP
GO:0140546	defense response to symbiont	51/1159	305/18903	5.29482e-11	4.79e-10	1.6993e-10	IL12B/IL4/IL6/IL33/IL1B/TLR2/TLR9/MBL2/IRF1/CXCL10/IL12RB1/TLR3/IFNGR2/F2RL1/STAT1/HSP90AA1/CASP1/MAVS/IFIH1/IL10RB/APOBEC3C/BIRC3/NLRP1/BECN1/DDX1/PTPRC/RELA/ZMPSTE24/PHB1/IFNA2/SKP2/ATG7/USP15/OPRK1/PRF1/ITCH/SAMHD1/TBKBP1/BCL2L1/TRAF3IP2/IFNA6/BIRC2/SETD2/TBK1/ZMYND11/CGAS/IKBKE/APOBEC3B/SENP7/OAS1/IFITM1	51	BP
GO:1903038	negative regulation of leukocyte cell-cell adhesion	33/1159	147/18903	5.53076e-11	4.99e-10	1.77239e-10	IL4R/IL4/IRF1/CD86/ARG1/CD80/HMGB1/TNFSF4/CXCL12/IDO1/CASP3/CEBPB/SHH/JAK3/PTEN/RUNX1/ERBB2/CCL21/VSIR/AKT1/CD274/BCL6/CR1/PDCD1LG2/PPARA/IFNA2/ITCH/PTPN6/PRDX2/WNK1/PDE5A/DUSP22/CD74	33	BP
GO:0061138	morphogenesis of a branching epithelium	38/1159	188/18903	5.56718e-11	5.02e-10	1.78143e-10	TNF/EDNRA/CSF1/VDR/VEGFA/AR/SRC/PTCH1/SHH/ST14/CTNNB1/ESR1/CASR/NOTCH1/BMP2/KDR/MYC/AGT/ACVR1/SIX1/ABL1/PKD1/MMP14/DDR1/DAG1/LAMA1/SFRP1/PDGFA/LEF1/FOXC2/KRAS/STK4/EPHA2/ILK/FGF1/GRB2/YAP1/PGR	38	BP
GO:0009259	ribonucleotide metabolic process	67/1159	466/18903	5.75688e-11	5.18e-10	1.83844e-10	IL4/TGFB1/PDE4D/XDH/PARP1/RHOA/PDE4B/RORA/NPPA/ENPP1/MTOR/EP300/HIF1A/ENO1/HSPA1A/PRKAA2/PKM/SULT1A1/PTHLH/PPARA/NT5E/HSPA8/PGK1/PPARGC1A/HSD17B4/HMGCR/INSR/AMPD1/SULT2B1/ELOVL1/PFKM/ARNT/MYH7/HPRT1/ALDOA/PDE7A/HINT1/NUDT3/PDE5A/RAN/NME1/PKLR/SPHK2/LRRK2/HK1/DGAT1/DHODH/CTPS1/MTHFD1/PFKL/UPB1/ATP6V1B1/EPHA2/IMPDH1/NMNAT1/PPT1/SLC25A1/ADCY1/ACACA/FBP1/PRKAA1/OPA1/PANK1/DNM1L/SNCA/ADK/NPR1	67	BP
GO:0043536	positive regulation of blood vessel endothelial cell migration	23/1159	75/18903	5.76231e-11	5.18e-10	1.83844e-10	TGFB1/PTGS2/NOS3/HMOX1/NFE2L2/HMGB1/ANGPT1/PRKCA/VEGFA/FGFR1/ADAM17/HSPB1/HIF1A/KDR/SIRT1/AKT1/PDPK1/PIK3C2A/ABL1/THBS1/FOXC2/PLCG1/CIB1	23	BP
GO:0009308	amine metabolic process	29/1159	117/18903	6.35472e-11	5.7e-10	2.02149e-10	HNMT/VCAM1/ITGB2/EDNRA/ITGAM/ALDH2/AOC1/IDO1/CYP1A1/SULT1A1/PNMT/ATP7A/MAOB/PARK7/HPRT1/DRD2/PAH/SLC7A11/EPAS1/DRD1/BHMT/GRIN2A/DRD3/SNCA/MAOA/GPR37/IDO2/AOC3/NPR1	29	BP
GO:0046632	alpha-beta T cell differentiation	29/1159	117/18903	6.35472e-11	5.7e-10	2.02149e-10	IL12B/IL4R/IL4/IL6/IL18/IL6R/IRF1/NLRP3/CD86/IL12RB1/CD80/HMGB1/TNFSF4/RHOA/CCL19/RORA/SHH/MTOR/RORC/JAK3/RUNX1/MALT1/RIPK2/BCL6/ATP7A/ABL1/PRDM1/RARA/LEF1	29	BP
GO:0044282	small molecule catabolic process	59/1159	385/18903	6.38097e-11	5.71e-10	2.02686e-10	HNMT/NOS2/NOS3/NOS1/ARG1/ALDH2/PON1/XDH/CYP3A4/IDO1/GPT/CYP27B1/CYP1A1/AKR1C3/PTEN/ADH5/TP53/FUT2/APOBEC3C/ENO1/PKM/SULT1A1/AKT1/CBS/GLB1/CYP26A1/PPARA/PGK1/CNR1/HSD17B4/FABP1/PARK7/CYP4F2/PFKM/HAO1/NUDT3/GLS/PAH/HK1/PFKL/UPB1/OAT/ALDH4A1/PEX2/SCARB1/BCAT2/NUDT1/INPP4B/APOBEC3B/BDH2/PLA2G15/IRS1/PPARD/AKR1A1/ALDH1B1/GAD1/DPEP1/DDAH1/IDO2	59	BP
GO:0060048	cardiac muscle contraction	32/1159	140/18903	6.55155e-11	5.84e-10	2.07216e-10	NOS1/PDE4D/ADORA1/CXCR4/CCN2/ACE2/HSP90AA1/PDE4B/ATP2A2/NPPA/MTOR/CAV1/GSTO1/CACNA1C/GJA1/FLNA/KCNQ1/SLC8A1/MYH7/ATP1A1/CACNA2D1/PDE5A/ATP2A1/TPM1/PIK3CA/ADRA1A/PRKACA/GRK2/SCN1A/KCNJ5/CALM1/KCNE1	32	BP
GO:0032409	regulation of transporter activity	53/1159	326/18903	6.55829e-11	5.84e-10	2.07216e-10	ADRB2/CCL2/TLR9/NOS1/EDNRA/PPARG/PDE4D/CHRM3/IFNGR2/CRHR1/CCR2/ABCB1/PON1/ITGB1/ACE2/OPRM1/PDE4B/NPPA/PLCG2/ABCC8/CAV1/GSTO1/CTSS/ATP7A/ADRA2A/PRKCD/KCNQ1/OXSR1/ACTB/PARK7/GRM5/SGK1/CAPN1/KMT2A/WNK1/KCNK3/CACNA2D1/RIPK1/DRD2/ATP2A1/SPHK2/KCNA1/PRKACA/PTK2B/PCSK9/CRBN/DRD3/SLMAP/PIM1/NR1H3/SNCA/CALM1/KCNE1	53	BP
GO:0030856	regulation of epithelial cell differentiation	35/1159	164/18903	6.56185e-11	5.84e-10	2.07216e-10	TNF/IL1B/IL1A/SERPINE1/STAT1/XDH/VDR/VEGFA/CEBPB/BMP6/TNFRSF1A/PTCH1/CTNNB1/CYP27B1/IKBKB/CCND1/CAV1/ACVRL1/NOTCH1/BMP2/PLCB1/SULT2B1/JAG1/S1PR3/HES1/SFN/KRAS/ROCK2/PRKCH/NCOA3/ROCK1/S1PR2/YAP1/ZEB1/KEAP1	35	BP
GO:0051100	negative regulation of binding	35/1159	164/18903	6.56185e-11	5.84e-10	2.07216e-10	ADRB2/HMOX1/JUN/NFKBIA/HDAC2/MAPK3/ATP2A2/JAK2/CAV1/DDIT3/BAX/MAPK8/HMGA2/GZMA/AKT1/PIN1/TNKS/DKK1/ATP2A3/PRKCD/STUB1/DVL1/PPARA/CDKN1A/GSK3B/ACTB/PARK7/P2RY1/LEF1/LRRK2/E2F1/AURKA/NEK2/PCSK9/ROCK1	35	BP
GO:0032623	interleukin-2 production	21/1159	63/18903	6.70929e-11	5.94e-10	2.1095e-10	IL1B/NOD2/IL1A/IL17F/CD86/CD80/PDE4D/CCR2/CLEC7A/PDE4B/PLCG2/TRAF6/RUNX1/PRKCQ/MALT1/RIPK2/PTPRC/ABL1/CR1/MAP3K7/KAT5	21	BP
GO:0032663	regulation of interleukin-2 production	21/1159	63/18903	6.70929e-11	5.94e-10	2.1095e-10	IL1B/NOD2/IL1A/IL17F/CD86/CD80/PDE4D/CCR2/CLEC7A/PDE4B/PLCG2/TRAF6/RUNX1/PRKCQ/MALT1/RIPK2/PTPRC/ABL1/CR1/MAP3K7/KAT5	21	BP
GO:0070059	intrinsic apoptotic signaling pathway in response to endoplasmic reticulum stress	21/1159	63/18903	6.70929e-11	5.94e-10	2.1095e-10	CEBPB/TP53/DDIT3/BAX/HSPA1A/SIRT1/ITPR1/MAP3K5/ATP2A3/CASP4/HYOU1/PARK7/BCL2L1/BCL2L11/ATP2A1/LRRK2/XBP1/BAK1/OPA1/PPP1R15A/PTPN1	21	BP
GO:0007173	epidermal growth factor receptor signaling pathway	28/1159	110/18903	6.87945e-11	6.09e-10	2.15986e-10	TGFB1/EGFR/ADORA1/SRC/ADAM17/ERBB2/ERBB4/GAB1/TGFA/AKT1/PDPK1/AGT/PIK3C2A/ABL1/ADRA2A/CDH13/NCF1/HBEGF/PTK2/SOS1/PIK3CA/SHC1/PTK2B/EREG/ITGA1/GRB2/GPER1/PLCG1	28	BP
GO:0060055	angiogenesis involved in wound healing	15/1159	31/18903	7.05499e-11	6.23e-10	2.21177e-10	TNF/ALOX5/SERPINE1/ITGB3/CXCR4/VEGFA/CX3CL1/GPX1/KDR/SLC12A2/DAG1/MCAM/FOXC2/XBP1/HPSE	15	BP
GO:0045639	positive regulation of myeloid cell differentiation	27/1159	103/18903	7.23509e-11	6.38e-10	2.26495e-10	TNF/IL12B/TGFB1/CSF1/STAT1/CASP8/CREB1/PRKCA/MAPK14/CCR1/FOS/FOXO3/TRAF6/RUNX1/HIF1A/HSPA1A/HAX1/PRKDC/PRMT1/ARNT/JAG1/LEF1/RIPK1/INPP5D/GPR68/CD74/KLF10	27	BP
GO:0050777	negative regulation of immune response	38/1159	190/18903	7.73093e-11	6.81e-10	2.41669e-10	IL12B/IL4R/IL4/IRAK3/IL33/NOD2/ALOX15/HMOX1/ARG1/PPARG/LYN/TNFSF4/CCR2/MAPK14/AHR/PARP1/FYN/SRC/PDCD1/JAK3/GPX1/BCL6/PTPRC/DUSP10/NR1H2/CR1/IFNA2/USP15/SAMHD1/PTPN6/DRD2/PSMA1/HCK/INPP5D/DUSP22/OAS1/NR1H3/PLCG1	38	BP
GO:0048754	branching morphogenesis of an epithelial tube	34/1159	157/18903	8.06083e-11	7.09e-10	2.51618e-10	TNF/EDNRA/CSF1/VDR/VEGFA/AR/SRC/PTCH1/SHH/CTNNB1/ESR1/CASR/NOTCH1/BMP2/KDR/MYC/AGT/ACVR1/SIX1/ABL1/PKD1/MMP14/DDR1/DAG1/LAMA1/LEF1/FOXC2/KRAS/STK4/EPHA2/ILK/FGF1/YAP1/PGR	34	BP
GO:0150077	regulation of neuroinflammatory response	17/1159	41/18903	8.11167e-11	7.12e-10	2.52615e-10	TNF/IL4/IL6/IL33/IL1B/IL18/PTGS2/MMP8/MMP3/CX3CL1/PLCG2/CTSC/NR1D1/PTPRC/ATM/LRRK2/SPHK1	17	BP
GO:0050796	regulation of insulin secretion	33/1159	149/18903	8.11608e-11	7.12e-10	2.52615e-10	TNF/ALOX5/CCL5/IL6/IL1B/NOS2/CD38/KCNJ11/JAK2/ABCC8/CASR/ANO1/HIF1A/NR1D1/ADRA2A/CNR1/TRPM2/SFRP1/RBP4/GCG/PFKM/DRD2/SLC16A1/SSTR5/HNF4A/PFKL/OSBP/TCF7L2/GPR68/IRS1/PPARD/GPER1/FFAR1	33	BP
GO:0014823	response to activity	22/1159	70/18903	8.78216e-11	7.69e-10	2.72955e-10	TNF/IL6/ITGB3/MMP2/CXCR4/FOS/SOD2/BMP6/HIF1A/PRKAA2/CRY1/CRY2/AGT/PPARGC1A/GCG/PIK3CA/PRKAA1/SLC7A5/PPARD/SRD5A1/ZEB1/CDK1	22	BP
GO:0051591	response to cAMP	25/1159	90/18903	9.34759e-11	8.17e-10	2.90112e-10	STAT1/AHR/FOS/THBD/COL1A1/RAPGEF3/CYP1B1/ITPR2/KCNQ1/AQP1/REN/DUOX1/SLC26A6/FOSB/SLC8A1/SDC1/APEX1/HSPA5/PKLR/BIRC2/PTK2B/FBP1/SRD5A1/KCNE1/RAP1A	25	BP
GO:0034329	cell junction assembly	63/1159	430/18903	9.8562e-11	8.61e-10	3.0546e-10	TNF/IL1B/TLR2/SMAD3/ITGB3/CDH1/PRKCA/ACE2/RHOA/VEGFA/SRC/CTNNB1/IKBKB/PTEN/ITGB4/CAV1/ACVRL1/ERBB4/IL1RAP/KDR/NRG1/PKP1/TJP1/GJA1/DKK1/CTNNA1/AGT/SIX1/ABL1/DVL1/APC/RAC1/MMP14/DLC1/TEK/PLEC/NTRK1/THBS1/ACHE/ACTB/SFRP1/PTK2/PIP5K1A/DRD2/GJB1/EPHA2/ROCK2/PRKACA/CDC42/GABRG2/DRD1/FLOT1/PTK2B/GABRB3/PRKCH/EPHB1/DUSP22/TPBG/ROCK1/GABRA2/SNCA/RAP1A/GPBAR1	63	BP
GO:0010469	regulation of signaling receptor activity	36/1159	175/18903	1.05747e-10	9.22e-10	3.27258e-10	ADRB2/TNF/CCL2/SERPINE1/PPARG/PDE4D/IFNGR2/HDAC2/CCR2/ADORA1/ITGB1/ACE2/HDAC1/OPRM1/SRC/JAK2/ADAM17/HIF1A/TGFA/DKK1/ADRA2A/PRKCD/PPARA/NCF1/HBEGF/PARK7/P2RY1/CAPN1/HDAC6/ESR2/SHC1/PTK2B/PCSK9/NCOA3/EREG/ADRA2C	36	BP
GO:0002861	regulation of inflammatory response to antigenic stimulus	18/1159	47/18903	1.09812e-10	9.55e-10	3.38872e-10	TNF/IL12B/LTA/NOD2/C3/LYN/MAPK14/BTK/CCR7/FYN/SRC/GPX1/CNR1/PARK7/CD81/PSMA1/HCK/PLCG1	18	BP
GO:0046677	response to antibiotic	18/1159	47/18903	1.09812e-10	9.55e-10	3.38872e-10	JAK1/CCR4/CASP8/AOC1/HSP90AA1/CASP3/SOD1/JAK2/CYP1A1/TP53/HYAL1/ATP7A/MDM2/ALPL/CASP9/HSPA5/SRD5A1/AOC3	18	BP
GO:0045229	external encapsulating structure organization	52/1159	321/18903	1.13729e-10	9.87e-10	3.50459e-10	TNF/TGFB1/IL6/SMAD3/ITGB3/MMP1/TPSAB1/MMP2/DPP4/ITGB1/CCN2/MMP8/MMP3/TGFBR1/TNFRSF1A/TGM1/RUNX1/NFKB2/CAV1/NOTCH1/BMP2/MMP7/LRP1/COL1A1/CTSS/LOXL1/CYP1B1/COL2A1/ANXA2/TGM3/COL1A2/AGT/ATP7A/ABL1/CFLAR/ADAMTS4/MMP14/ADAMTS1/DDR1/NOX1/DAG1/LAMA1/CTSK/MMP13/FOXC2/SERPINH1/PRSS1/DNAJB6/FLOT1/PDPN/RXFP1/LCP1	52	BP
GO:2001235	positive regulation of apoptotic signaling pathway	31/1159	135/18903	1.14678e-10	9.94e-10	3.52882e-10	TNF/LCK/TGFBR1/SOD1/FAS/JAK2/PTEN/CTSC/TP53/CAV1/DDIT3/BAX/SIRT1/MYC/BECN1/CTNNA1/AGT/PTPRC/PRKCD/VNN1/NOX1/THBS1/BID/SFRP1/PARK7/BCL2L11/RIPK1/STK4/DNM1L/MCL1/GPER1	31	BP
GO:0015844	monoamine transport	24/1159	84/18903	1.16039e-10	1e-09	3.56562e-10	NOS1/ITGB3/CXCL12/ADORA3/HRH3/AGT/ADRA2A/MAOB/OPRK1/CNR1/ACTB/P2RX1/PARK7/P2RY1/DRD2/SLC22A1/DRD1/GRK2/DRD3/SLC18A1/GABBR1/SNCA/ADRA2C/CHRM5	24	BP
GO:0043588	skin development	50/1159	302/18903	1.17768e-10	1.02e-09	3.61363e-10	TNF/IL18/IL1A/HDAC2/EGFR/VDR/HDAC1/CASP3/SHH/TGM1/ST14/CTNNB1/CYP27B1/AKR1C3/ITGB4/LTB/NOTCH1/COL1A1/TGM3/COL1A2/DKK1/GBA1/RELA/ATP7A/ZMPSTE24/PKD1/PLEC/MAP2K1/PDGFA/RYR1/ELOVL1/PIP5K1A/SOS1/FLNB/JAG1/TRAF3IP2/CDH3/SFN/STK4/DHCR24/EPHA2/ROCK2/PRKCH/NCOA3/SHARPIN/KRT81/EREG/ROCK1/YAP1/HPSE	50	BP
GO:0033198	response to ATP	15/1159	32/18903	1.25283e-10	1.08e-09	3.8388e-10	IL1B/PTGS2/TRPV1/SOD1/KCNJ11/ENPP1/P2RY12/P2RY2/NT5E/HSP90B1/P2RX1/SLC8A1/P2RY1/PKLR/P2RX6	15	BP
GO:1905953	negative regulation of lipid localization	21/1159	65/18903	1.31096e-10	1.13e-09	4.01122e-10	TNF/IL6/PPARG/ITGB3/NFKBIA/NFKB1/SHH/ABHD5/ABCA1/AKT1/CRY1/CRY2/NR1H2/PPARA/THBS1/CYP4F2/CES1/PCSK9/PNPLA2/NR1H3/PPARD	21	BP
GO:0061098	positive regulation of protein tyrosine kinase activity	20/1159	59/18903	1.34893e-10	1.16e-09	4.12158e-10	CCL5/EGFR/ADORA1/SRC/ADAM17/ERBB4/NRG1/TGFA/CSF1R/AGT/NOX4/ADRA2A/NCF1/HBEGF/GRM5/LTK/ADRA1A/DVL2/EREG/PTPN1	20	BP
GO:0051385	response to mineralocorticoid	16/1159	37/18903	1.36234e-10	1.17e-09	4.15177e-10	CCN2/PARP1/FOS/SRC/CYBB/FOXO3/CCND1/SCNN1A/IGF1R/MAOB/SCNN1G/HSD3B1/FOSB/SCNN1B/SGK1/GPER1	16	BP
GO:0002456	T cell mediated immunity	28/1159	113/18903	1.36456e-10	1.17e-09	4.15177e-10	IL12B/IL4/IL6/IL1B/IL18/ICAM1/NOD2/IL1R1/NLRP3/ARG1/IL12RB1/HMGB1/TNFSF4/CCR2/AHR/TRAF6/CTSC/HSPD1/MALT1/PTPRC/MAP3K7/IFNA2/PRF1/JAG1/HPRT1/CD81/DUSP22/HLA-DRB3	28	BP
GO:1905954	positive regulation of lipid localization	28/1159	113/18903	1.36456e-10	1.17e-09	4.15177e-10	IL1B/IL1A/MIF/C3/PPARG/NFKBIA/NFKB1/PON1/BMP6/PTCH1/SPP1/CAV1/APOA1/ABCA1/PTGES/LRP1/ANXA2/SIRT1/NR1H2/PRKCD/EHD1/CYP4F2/GALR1/CES1/SCARB1/IKBKE/MSR1/NR1H3	28	BP
GO:0016241	regulation of macroautophagy	34/1159	160/18903	1.38751e-10	1.19e-09	4.21569e-10	ADRB2/IL4/NOD2/NOD1/HMOX1/MAPK3/CASP3/MTOR/TP53/HIF1A/MAPK8/KDR/PRKAA2/SIRT1/RIPK2/AKT1/BECN1/GBA1/IKBKG/MAP3K7/VDAC1/BAG3/IRGM/SPTLC1/CAPN1/HDAC6/PIK3CA/LRRK2/ATP6V1B1/RNF31/PRKACA/NPC1/TBK1/PIP4K2A	34	BP
GO:0019318	hexose metabolic process	42/1159	229/18903	1.41215e-10	1.21e-09	4.28453e-10	TNF/NR3C1/MAPK14/SRC/GPT/KCNJ11/RORA/G6PD/RORC/TP53/FUT2/EP300/ENO1/PKM/SIRT1/AKT1/AKR1B1/GLB1/CRY1/ZMPSTE24/KCNQ1/PPARA/PGK1/G6PC1/PPARGC1A/RBP4/INSR/MAN2B1/GCG/PFKM/ALDOA/PIK3CA/ADIPOR1/HK1/PFKL/SLC25A1/FUCA1/FBP1/PRKAA1/OAS1/IRS1/PPARD	42	BP
GO:0071322	cellular response to carbohydrate stimulus	33/1159	152/18903	1.42251e-10	1.21e-09	4.30993e-10	ICAM1/CLEC7A/FOXO3/CASR/GPX1/ANO1/HIF1A/NR1D1/PRKAA2/NOX4/ADRA2A/PLCB1/IGF1R/RAF1/SMARCA4/OPRK1/NCF1/MEN1/SLC26A6/GCG/KAT5/PIK3CA/XBP1/PRKACA/SERPINF1/OSBP/FBP1/MAP2K4/PRKAA1/LIN28A/GPR68/PPARD/GPER1	33	BP
GO:0010508	positive regulation of autophagy	32/1159	144/18903	1.42815e-10	1.22e-09	4.32099e-10	ADRB2/IL4/NOD2/TLR9/NOD1/HMOX1/HMGB1/MAPK3/FOXO3/HIF1A/KDR/PRKAA2/SIRT1/RIPK2/BECN1/PIK3C2A/IKBKG/MAP3K7/VDAC1/GSK3B/BAG3/IRGM/PARK7/SPTLC1/KAT5/BCL2L11/LRRK2/RNF31/TBK1/PRKAA1/PIP4K2A/ROCK1	32	BP
GO:0001701	in utero embryonic development	59/1159	393/18903	1.47345e-10	1.25e-09	4.45182e-10	CSF2/SMAD3/NOS3/SMAD2/EDNRA/CASP8/EGFR/ANGPT1/ITGB1/VEGFA/CEBPB/AR/TGFBR1/PTCH1/MAPK1/LIG4/ST14/CTNNB1/TRAF6/TP53/ACVRL1/NOTCH1/BMP2/HIF1A/NCOA1/AKT1/CEBPA/ACVR1/ATP7A/TET1/PRMT1/PKD1/CHEK1/NBN/MAP2K1/POU5F1/PRDM1/ARNT/BCL2L1/LEF1/HES1/BCL2L11/KDM4C/CAPN2/DNAJB6/AXIN1/YBX1/STK4/UPB1/SETD2/EPAS1/NEK2/BPTF/NMT1/BMI1/GRB2/YAP1/KEAP1/HM13	59	BP
GO:0021700	developmental maturation	50/1159	304/18903	1.49812e-10	1.27e-09	4.52005e-10	EDNRA/C3/PPARG/CX3CR1/MMP2/LTF/CCR6/BTK/RHOA/VEGFA/CLEC7A/CCL19/CX3CL1/CTNNB1/G6PD/FOXO3/PTEN/ACVRL1/DDIT3/BMP2/EBP/HIF1A/KDR/EDNRB/CCL21/CEBPA/FGG/AKR1B1/S1PR1/GBA1/CD63/ANG/REN/DAG1/SLC26A6/ALDH1A2/YWHAZ/RYR1/HES1/CDH3/LRRK2/PRKACA/AURKA/EPAS1/PTK2B/CDC25B/PICALM/EREG/PGR/KCNE1	50	BP
GO:0045776	negative regulation of blood pressure	18/1159	48/18903	1.65682e-10	1.41e-09	4.99192e-10	ADRB2/TNF/NOS2/NOS3/NOS1/TRPV1/ADORA1/SOD2/NPPA/CALCA/ADRB1/BDKRB1/GLP1R/PPARA/CNR1/DRD2/ADRA1A/DRD3	18	BP
GO:1901888	regulation of cell junction assembly	39/1159	204/18903	1.79631e-10	1.52e-09	5.40468e-10	TNF/IL1B/TLR2/SMAD3/ACE2/RHOA/VEGFA/SRC/IKBKB/PTEN/CAV1/ACVRL1/IL1RAP/KDR/TJP1/DKK1/AGT/SIX1/ABL1/RAC1/MMP14/DLC1/TEK/NTRK1/THBS1/SFRP1/PTK2/EPHA2/ROCK2/PRKACA/FLOT1/PRKCH/EPHB1/DUSP22/TPBG/ROCK1/SNCA/RAP1A/GPBAR1	39	BP
GO:0002292	T cell differentiation involved in immune response	23/1159	79/18903	1.8605e-10	1.57e-09	5.58231e-10	IL12B/IL4R/IL4/IL6/IL18/IL6R/NLRP3/CD86/IL12RB1/CD80/HMGB1/TNFSF4/CCL19/RORA/MTOR/RORC/JAK3/MALT1/RIPK2/BCL6/ATP7A/RARA/LEF1	23	BP
GO:2000514	regulation of CD4-positive, alpha-beta T cell activation	23/1159	79/18903	1.8605e-10	1.57e-09	5.58231e-10	IL12B/IL4R/IL4/IL18/NLRP3/CD86/IL12RB1/CD80/HMGB1/TNFSF4/CCL19/JAK3/RUNX1/VSIR/PRKCQ/MALT1/RIPK2/CD274/BCL6/ITCH/RARA/CD81/HLA-DRB3	23	BP
GO:0009150	purine ribonucleotide metabolic process	64/1159	447/18903	1.86578e-10	1.58e-09	5.59043e-10	IL4/TGFB1/PDE4D/XDH/PARP1/RHOA/PDE4B/RORA/NPPA/ENPP1/MTOR/EP300/HIF1A/ENO1/HSPA1A/PRKAA2/PKM/SULT1A1/PTHLH/PPARA/NT5E/HSPA8/PGK1/PPARGC1A/HSD17B4/HMGCR/INSR/AMPD1/SULT2B1/ELOVL1/PFKM/ARNT/MYH7/HPRT1/ALDOA/PDE7A/HINT1/NUDT3/PDE5A/RAN/NME1/PKLR/SPHK2/LRRK2/HK1/DGAT1/MTHFD1/PFKL/ATP6V1B1/EPHA2/IMPDH1/NMNAT1/PPT1/SLC25A1/ADCY1/ACACA/FBP1/PRKAA1/OPA1/PANK1/DNM1L/SNCA/ADK/NPR1	64	BP
GO:0035637	multicellular organismal signaling	35/1159	170/18903	1.87337e-10	1.58e-09	5.60541e-10	PDE4D/ACE2/ATP2A2/SOD1/MTOR/CAV1/SCN4A/CACNA1C/S1PR1/GJA1/ATP2A3/AGT/GBA1/ZMPSTE24/FLNA/KCNQ1/PLEC/CHRNA1/P2RX1/SLC8A1/ATP1A1/CACNA2D1/ATP2A1/CACNA1H/KCNA1/PRKACA/DRD1/SCN1A/SCN2A/KCNJ5/GPER1/CALM1/KCNE1/CHRM5/SCN9A	35	BP
GO:0030278	regulation of ossification	29/1159	122/18903	1.88289e-10	1.59e-09	5.62613e-10	ADRB2/ALOX5/TGFB1/SMAD3/CSF1/TACR1/LTF/MAPK14/VDR/MAPK3/CCR1/BMP6/ENPP1/MAPK1/CALCA/CYP27B1/NOTCH1/BMP2/HIF1A/S1PR1/DKK1/ACVR1/ZMPSTE24/RXRB/SFRP1/SLC8A1/TPH1/PTK2B/ESRRA	29	BP
GO:1905517	macrophage migration	20/1159	60/18903	1.90762e-10	1.6e-09	5.69216e-10	CCL5/CCL2/MIF/C5AR1/CSF1/CX3CR1/CCR2/MMP2/MAPK3/MAPK1/CX3CL1/EDNRB/P2RY12/CSF1R/MMP14/THBS1/PTK2/CD81/PTK2B/CMKLR1	20	BP
GO:0042554	superoxide anion generation	17/1159	43/18903	2.00462e-10	1.68e-09	5.96518e-10	TGFB1/GSTP1/ITGB2/F2RL1/ITGAM/CLEC7A/SOD2/SOD1/CYBB/FPR2/AGT/NOX4/PRKCD/NOX1/DUOX1/NCF1/MAPT	17	BP
GO:0071548	response to dexamethasone	17/1159	43/18903	2.00462e-10	1.68e-09	5.96518e-10	NR3C1/ARG1/JAK2/FOXO3/CYP1B1/GBA1/IGF1R/CFLAR/SMYD3/AQP1/EIF4E/CASP9/PIK3CA/RPS6KB1/SERPINF1/BMI1/SRD5A1	17	BP
GO:0044070	regulation of anion transport	25/1159	93/18903	2.02609e-10	1.69e-09	6.01254e-10	TNF/IL1B/IL1A/ARG1/MIF/ABCB1/ADORA1/ITGB1/ACE2/CEBPB/HRH3/PTGES/CRY2/AGT/SLC12A2/SLC34A1/GRM5/CYP4F2/RIPK1/CA2/CES1/ATP8B1/PRKAA1/GABBR1/SNCA	25	BP
GO:1904427	positive regulation of calcium ion transmembrane transport	25/1159	93/18903	2.02609e-10	1.69e-09	6.01254e-10	CXCL10/F2R/CX3CL1/PLCG2/G6PD/CAV1/BAX/GSTO1/ADCYAP1R1/MS4A1/BDKRB1/F2/PDPK1/ABL1/CXCL11/P2RX1/CACNA2D1/ATP2A1/BAK1/DRD1/GPER1/SNCA/PLCG1/CALM1/KCNE1	25	BP
GO:0002706	regulation of lymphocyte mediated immunity	36/1159	179/18903	2.06306e-10	1.72e-09	6.11388e-10	TNF/IL12B/IL4/TGFB1/IL6/IL1B/IL18/LTA/NOD2/IL1R1/NLRP3/ARG1/C3/IL12RB1/HMGB1/TNFSF4/CCR2/BTK/AHR/TRAF6/TFRC/HSPD1/MALT1/BCL6/PTPRC/CR1/MAP3K7/IFNA2/PTPN6/TP53BP1/CD81/RASGRP1/KLRK1/DUSP22/HLA-DRB3/TNFSF13	36	BP
GO:0048738	cardiac muscle tissue development	43/1159	241/18903	2.12439e-10	1.77e-09	6.28131e-10	TGFB1/EDNRA/CREB1/MAPK14/ITGB1/VEGFA/TGFBR1/NPPA/MTOR/G6PD/PTEN/RUNX1/NOTCH1/ERBB4/BMP2/NRG1/S1PR1/GJA1/DKK1/AGT/ACVR1/NOX4/ABL1/ZMPSTE24/PRMT1/PPARA/PLEC/RBP4/ALDH1A2/SLC8A1/RARA/MYH7/PDGFRB/PTCD2/FOXC2/TPM1/RARB/ADRA1A/CDC42/MAP2K4/PIM1/YAP1/CDK1	43	BP
GO:0055093	response to hyperoxia	12/1159	20/18903	2.12536e-10	1.77e-09	6.28131e-10	HDAC2/MMP2/SOD2/FAS/CYP1A1/CAV1/COL1A1/ATG7/NOX1/PDGFRB/SLC7A5/PDPN	12	BP
GO:0046635	positive regulation of alpha-beta T cell activation	22/1159	73/18903	2.19683e-10	1.82e-09	6.47487e-10	IL12B/IL4R/IL18/NLRP3/CD86/IL12RB1/CD80/TNFSF4/CCR2/RHOA/CCL19/JAK2/SHH/RUNX1/PRKCQ/MALT1/RIPK2/PTPRC/RARA/CD81/HSPH1/HLA-DRB3	22	BP
GO:0072678	T cell migration	22/1159	73/18903	2.19683e-10	1.82e-09	6.47487e-10	CCL5/ICAM1/CCL2/CCL26/CXCL10/ITGAL/ITGB3/CCR2/CXCL12/CCR6/RHOA/CCL20/ADAM17/CCL21/S1PR1/CXCL13/ABL1/CXCL11/OXSR1/PLEC/SLC12A2/WNK1	22	BP
GO:0051962	positive regulation of nervous system development	47/1159	279/18903	2.33829e-10	1.94e-09	6.87596e-10	TNF/TGFB1/IL6/IL33/IL1B/TLR2/LTA/CX3CR1/LYN/HDAC2/CXCL12/CXCR4/ITGB1/MME/VEGFA/HDAC1/OPRM1/CX3CL1/SHH/LIG4/CTNNB1/MTOR/NOTCH1/BMP2/IL1RAP/HIF1A/KIT/TRPV2/NTRK1/MAP2K1/DAG1/GRM5/HES1/DRD2/KRAS/E2F1/LIMK1/SERPINF1/MAPT/PRKCH/EPHB1/SLC7A5/TPBG/GPER1/MAP2K2/PAK3/TRPC5	47	BP
GO:0032526	response to retinoic acid	27/1159	108/18903	2.33926e-10	1.94e-09	6.87596e-10	TNF/LYN/HDAC2/CREB1/MMP2/CD38/BMP6/PTCH1/TFRC/ABCA1/COL1A1/DKK1/CYP26A1/ATM/AQP1/GSK3B/RXRB/RBP4/ALDH1A2/PDGFA/RARA/LTK/PDGFRB/SERPINF1/PTK2B/YAP1/RORB	27	BP
GO:0070227	lymphocyte apoptotic process	23/1159	80/18903	2.46126e-10	2.04e-09	7.22475e-10	CCL5/MIF/LYN/IDO1/BTK/FAS/PDCD1/JAK3/PTEN/TP53/BAX/HIF1A/PRKCQ/AKT1/CD274/BCL6/FNIP1/TRAF3IP2/BCL2L11/RIPK1/BAK1/CHEK2/CD74	23	BP
GO:0045933	positive regulation of muscle contraction	18/1159	49/18903	2.46954e-10	2.04e-09	7.23925e-10	PTGS2/CHRM3/TACR1/CCN2/ACE2/RHOA/F2R/HSP90AA1/NPPA/GSTO1/ENO1/KIT/KCNQ1/ATP1A1/ATP2A1/ADRA1A/SPHK1/GPER1	18	BP
GO:0090287	regulation of cellular response to growth factor stimulus	53/1159	338/18903	2.57512e-10	2.12e-09	7.53855e-10	IL12B/IL4/TGFB1/IL1B/SMAD3/IL17F/SMAD2/PPARG/CREBBP/ITGB3/HDAC2/XDH/HDAC1/FGFR1/CTNNB1/ADAM17/TP53/CAV1/ACVRL1/NOTCH1/EP300/BMP2/HIF1A/KDR/HSPA1A/XIAP/SIRT1/PIN1/PDPK1/CXCL13/DKK1/AGT/ABL1/TET1/CFLAR/STUB1/CD63/PPARA/THBS1/MEN1/SFRP1/BMPER/ARNT/SMURF2/HES1/HSPA5/AXIN1/FGF4/PRDM16/ILK/FGF1/PTPN1/ZEB1	53	BP
GO:0035304	regulation of protein dephosphorylation	25/1159	94/18903	2.60136e-10	2.14e-09	7.60507e-10	TNF/TGFB1/ADORA1/JAK2/MTOR/IKBKB/PIN1/CRY2/PTPRC/GBA1/PRKCD/CSNK2B/DLC1/PTBP1/HSP90B1/GSK3B/YWHAB/PDGFRB/DRD2/ROCK2/PPP1R15A/PPIA/ROCK1/ITGA1/CALM1	25	BP
GO:0051702	biological process involved in interaction with symbiont	28/1159	116/18903	2.6373e-10	2.17e-09	7.69977e-10	CCL5/MBL2/ARG1/JUN/CX3CR1/F2RL1/LTF/HDAC1/JAK2/TREM1/GPX1/EP300/CFL1/HSPD1/HMGA2/F2/CSF1R/PHB1/CXCL6/DCD/HSPA8/SMARCA4/SCNN1B/CCNT1/LEF1/ROCK2/CDC42/EEF1A1	28	BP
GO:0042743	hydrogen peroxide metabolic process	19/1159	55/18903	2.68872e-10	2.21e-09	7.82879e-10	CYP1A2/MMP3/FYN/SOD2/SOD1/CYBB/CYP1A1/RAC2/GPX1/PRDX5/RAC1/MAOB/NOX1/DUOX1/PARK7/PRDX1/PRDX2/HDAC6/SNCA	19	BP
GO:0071385	cellular response to glucocorticoid stimulus	19/1159	55/18903	2.68872e-10	2.21e-09	7.82879e-10	NR3C1/ARG1/JAK2/FOXO3/CYP1B1/ACVR1/IGF1R/CFLAR/SMYD3/AQP1/EIF4E/CASP9/BCL2L11/SSTR5/RPS6KB1/SERPINF1/UGT1A1/BMI1/SRD5A1	19	BP
GO:0046660	female sex differentiation	29/1159	124/18903	2.85547e-10	2.34e-09	8.29753e-10	NOS3/MMP2/VEGFA/CASP3/CEBPB/SRC/SOD1/ESR1/FOXO3/BAX/KDR/ADCYAP1R1/SIRT1/CTNNA1/KIT/MMP14/ATM/ADAMTS1/ANG/SFRP1/RBP4/INSR/BCL2L1/HSPA5/BAK1/AFP/EREG/SRD5A1/PGR	29	BP
GO:0110148	biomineralization	36/1159	181/18903	2.85737e-10	2.34e-09	8.29753e-10	ADRB2/ALOX5/TGFB1/PTGS2/SMAD3/NOS3/ALOX15/LTF/ADORA1/VDR/CCR1/CEBPB/BMP6/ENPP1/CYP27B1/SPP1/NOTCH1/BMP2/HIF1A/COL1A1/PTHLH/S1PR1/COL1A2/ACVR1/ZMPSTE24/PPARA/NT5E/ALPL/ATG4B/MMP13/RXRB/SLC8A1/ROCK2/PTK2B/ROCK1/KLF10	36	BP
GO:0007179	transforming growth factor beta receptor signaling pathway	40/1159	216/18903	2.86536e-10	2.34e-09	8.30959e-10	TGFB1/SMAD3/IL17F/SMAD2/JUN/PPARG/CREBBP/HDAC2/PARP1/HDAC1/FOS/SRC/TGFBR1/ADAM17/TP53/CAV1/ACVRL1/EP300/BMP2/HSPA1A/SIRT1/PIN1/PDPK1/COL1A2/ACVR1/TET1/MAP3K7/STUB1/PPARA/USP15/THBS1/MEN1/PTK2/SMURF2/HSPA5/AXIN1/PRDM16/DUSP22/HPGD/ZEB1	40	BP
GO:0032732	positive regulation of interleukin-1 production	22/1159	74/18903	2.94693e-10	2.4e-09	8.53473e-10	TNF/TLR4/IL6/NOD2/SMAD3/NOD1/NLRP3/F2RL1/HMGB1/HDAC2/CASP8/CLEC7A/CCL19/CASP1/JAK2/HSPB1/MALT1/RIPK2/NLRP1/EGR1/GSDMD/HK1	22	BP
GO:0051302	regulation of cell division	37/1159	190/18903	3.04367e-10	2.48e-09	8.80314e-10	TGFB1/IL1B/IL1A/RHOA/VEGFA/PTCH1/SHH/CXCR5/MYC/TGFA/PIN1/BECN1/IGF1R/PLK1/KIF23/PDGFA/POU5F1/BCL2L1/FGF5/DRD2/SFN/SSTR5/YBX1/SETD2/AURKA/CDC42/FGF4/CDC25B/NCOA3/DRD3/KIF20B/EREG/FGF1/RXFP3/CALM1/PGF/CIB1	37	BP
GO:0010575	positive regulation of vascular endothelial growth factor production	14/1159	29/18903	3.19484e-10	2.6e-09	9.22805e-10	TGFB1/IL6/IL1B/PTGS2/IL1A/C5AR1/C3/RORA/HIF1A/CYP1B1/NOX1/ARNT/BRCA1/HPSE	14	BP
GO:0006606	protein import into nucleus	34/1159	165/18903	3.31841e-10	2.7e-09	9.57221e-10	TGFB1/PTGS2/SMAD3/NFKBIA/ANGPT1/CDH1/MAPK14/HSP90AA1/JAK2/SHH/MAVS/RANBP6/TP53/NOTCH1/AKT1/CRY2/AGT/PRKCD/FLNA/HDAC3/CDKN1A/BAG3/TNPO1/KPNB1/PIK3R1/TRAF3IP2/RAN/IPO7/LRRK2/ELAVL1/STK4/SQSTM1/DRD1/CDK1	34	BP
GO:0043367	CD4-positive, alpha-beta T cell differentiation	24/1159	88/18903	3.36063e-10	2.73e-09	9.68108e-10	IL12B/IL4R/IL4/IL6/IL18/IL6R/NLRP3/CD86/IL12RB1/CD80/HMGB1/TNFSF4/CCL19/RORA/MTOR/RORC/JAK3/RUNX1/MALT1/RIPK2/BCL6/ATP7A/RARA/LEF1	24	BP
GO:0043550	regulation of lipid kinase activity	21/1159	68/18903	3.39452e-10	2.75e-09	9.76574e-10	TGFB1/NOD2/LYN/CCR7/FLT1/SRC/CCL19/CCL21/P2RY12/F2/KIT/TEK/PTK2/PDGFRB/PIK3R1/CD81/CDC42/PTK2B/PIP4K2A/IRS1/CCKBR	21	BP
GO:0061082	myeloid leukocyte cytokine production	18/1159	50/18903	3.63871e-10	2.95e-09	1.04544e-09	IRAK3/TGFB1/TLR4/NOD2/NOD1/HMOX1/MIF/TLR3/PLCG2/MAVS/SIRT1/RIPK2/BCL6/DDX1/KIT/NR4A3/MAPKAPK2/CD74	18	BP
GO:0036336	dendritic cell migration	15/1159	34/18903	3.65819e-10	2.96e-09	1.04964e-09	ALOX5/CCL5/CCR5/HMGB1/CXCR1/CCR2/CXCR2/CCR6/CXCR4/CCR7/CCR1/CCL19/CCL21/TRPM2/CDC42	15	BP
GO:0022617	extracellular matrix disassembly	20/1159	62/18903	3.72405e-10	3.01e-09	1.06712e-09	TGFB1/IL6/MMP1/TPSAB1/MMP2/DPP4/MMP8/MMP3/MMP7/LRP1/CTSS/ADAMTS4/MMP14/DDR1/CTSK/MMP13/PRSS1/FLOT1/PDPN/LCP1	20	BP
GO:0002429	immune response-activating cell surface receptor signaling pathway	50/1159	312/18903	3.82447e-10	3.08e-09	1.09301e-09	MBL2/C5AR1/PDE4D/CREBBP/LYN/BTK/CCR7/LCK/CD38/FYN/CLEC7A/PDE4B/SRC/MAPK1/PLCG2/IKBKB/TRAF6/EP300/FPR2/BAX/ICOSLG/MS4A1/MALT1/RIPK2/PTPRC/RELA/ABL1/CR1/IKBKG/PRKCD/MAP3K7/FPR1/PTK2/PTPN6/WNK1/CD81/PIK3CA/HCK/RNF31/LIMK1/NR4A3/KLRK1/PRKCH/INPP5D/DUSP22/HLA-DRB3/CMKLR1/HRAS/PAK3/PLCG1	50	BP
GO:0002757	immune response-activating signal transduction	50/1159	312/18903	3.82447e-10	3.08e-09	1.09301e-09	MBL2/C5AR1/PDE4D/CREBBP/LYN/BTK/CCR7/LCK/CD38/FYN/CLEC7A/PDE4B/SRC/MAPK1/PLCG2/IKBKB/TRAF6/EP300/FPR2/BAX/ICOSLG/MS4A1/MALT1/RIPK2/PTPRC/RELA/ABL1/CR1/IKBKG/PRKCD/MAP3K7/FPR1/PTK2/PTPN6/WNK1/CD81/PIK3CA/HCK/RNF31/LIMK1/NR4A3/KLRK1/PRKCH/INPP5D/DUSP22/HLA-DRB3/CMKLR1/HRAS/PAK3/PLCG1	50	BP
GO:2000630	positive regulation of miRNA metabolic process	19/1159	56/18903	3.83703e-10	3.09e-09	1.09515e-09	TNF/TGFB1/NR3C1/SMAD3/JUN/PPARG/NFKB1/FOS/FOXO3/TP53/BMP2/HIF1A/MYC/NR1H2/RELA/EGR1/SMARCA4/TEAD1/HRAS	19	BP
GO:0031649	heat generation	11/1159	17/18903	3.86408e-10	3.1e-09	1.10142e-09	ADRB2/TNF/IL1B/PTGS2/IL1A/TRPV1/PTGES/ADRB1/EDNRB/CNR1/SLC27A1	11	BP
GO:0071479	cellular response to ionizing radiation	22/1159	75/18903	3.93099e-10	3.15e-09	1.11902e-09	MAPK14/LIG4/TP53/SIRT1/ZMPSTE24/MDM2/EGR1/ATM/CDKN1A/SFRP1/EEF1D/BCL2L1/TP53BP1/BRCA1/HSPA5/RAD51/ELK1/GRB2/YAP1/CHEK2/ATR/HRAS	22	BP
GO:0045787	positive regulation of cell cycle	55/1159	362/18903	3.96248e-10	3.17e-09	1.12651e-09	TNF/IL1B/IL1A/EGFR/PRKCA/CCN2/RHOA/SRC/TGM1/ADAM17/PLCG2/CYP1A1/CCND1/CXCR5/TGFA/AKT1/HYAL1/BECN1/ABL1/MDM2/PLCB1/IGF1R/PKD1/CHEK1/ADAMTS1/EIF4E/BRD4/KIF23/INSR/APEX1/RARA/CCNT1/PDGFRB/HES1/CDK4/KAT5/BCL2L11/FEN1/VPS4B/DRD2/SSTR5/RPS6KB1/ESPL1/ROCK2/AURKA/CDC42/CDC25B/DRD3/KIF20B/EREG/SPHK1/RXFP3/CHEK2/CDK1/EIF4EBP1	55	BP
GO:0001678	cellular glucose homeostasis	33/1159	158/18903	4.16448e-10	3.33e-09	1.18238e-09	ICAM1/ABCC8/FOXO3/CASR/GPX1/ANO1/HIF1A/NR1D1/PRKAA2/SIRT1/NOX4/ADRA2A/IGF1R/RAF1/SMARCA4/OPRK1/NCF1/PPARGC1A/MEN1/GCG/PIK3R1/KAT5/PIK3CA/XBP1/HK1/PRKACA/SERPINF1/OSBP/PRKAA1/LIN28A/GPR68/PPARD/GPER1	33	BP
GO:0045807	positive regulation of endocytosis	25/1159	96/18903	4.24002e-10	3.38e-09	1.20068e-09	IL4/CD14/SERPINE1/C3/F2RL1/SELE/ANGPT1/VEGFA/CCL19/PLCG2/TF/LRP1/CLU/CCL21/ANXA2/ARRB1/CD63/INSR/DRD2/LRRK2/CDC42/PPT1/FLOT1/PCSK9/SNCA	25	BP
GO:0061097	regulation of protein tyrosine kinase activity	25/1159	96/18903	4.24002e-10	3.38e-09	1.20068e-09	CCL5/ITGB3/EGFR/ADORA1/SRC/ADAM17/CAV1/ERBB4/NRG1/TGFA/CSF1R/AGT/PTPRC/NOX4/ADRA2A/NCF1/HBEGF/GRM5/LTK/ADRA1A/SHC1/DVL2/DUSP22/EREG/PTPN1	25	BP
GO:0010821	regulation of mitochondrion organization	32/1159	150/18903	4.33562e-10	3.45e-09	1.22494e-09	PPARG/GZMB/TFRC/TP53/GPX1/EP300/BAX/HIF1A/MAPK8/KDR/CLU/HSPA1A/AKT1/HAX1/VDAC1/PPARGC1A/BID/GSK3B/PARK7/BCL2L1/HDAC6/BCL2L11/HUWE1/LRRK2/BAK1/SQSTM1/AURKA/MAPT/OPA1/NMT1/DNM1L/GPER1	32	BP
GO:0046849	bone remodeling	24/1159	89/18903	4.33698e-10	3.45e-09	1.22494e-09	ADRB2/TGFB1/IL6/ITGB3/PRKCA/CD38/SRC/CALCA/CTNNB1/SPP1/TRAF6/TFRC/TF/MC4R/S1PR1/GJA1/CSF1R/NOX4/CTSK/SFRP1/TPH1/EPHA2/PTK2B/INPP5D	24	BP
GO:0031396	regulation of protein ubiquitination	39/1159	210/18903	4.38063e-10	3.48e-09	1.23565e-09	NOD2/ANGPT1/HSP90AA1/FYN/TGFBR1/TRAF6/PTEN/CAV1/HSPA1A/BIRC3/XIAP/MALT1/RIPK2/AKT1/PIN1/ARRB1/CRY1/ABL1/STUB1/HDAC3/SKP2/PLK1/PARK7/FZR1/PEF1/BRCA1/HSPA5/HUWE1/DNAJA1/AXIN1/LRRK2/OTUB1/BIRC2/SQSTM1/LIMK1/HDAC8/PPIA/BMI1/SPHK1	39	BP
GO:0014015	positive regulation of gliogenesis	21/1159	69/18903	4.60012e-10	3.65e-09	1.2942e-09	TNF/TGFB1/IL6/IL33/IL1B/TLR2/LTA/LYN/HDAC2/CXCR4/HDAC1/SHH/MTOR/NOTCH1/BMP2/DAG1/HES1/KRAS/E2F1/PRKCH/SLC7A5	21	BP
GO:0061180	mammary gland epithelium development	21/1159	69/18903	4.60012e-10	3.65e-09	1.2942e-09	NR3C1/CSF1/VDR/CEBPB/AR/SRC/PTCH1/MAPK1/JAK2/ESR1/CCND1/ORAI1/GPX1/ERBB4/BAX/HIF1A/AKT1/CSF1R/DDR1/EPHA2/PGR	21	BP
GO:0006909	phagocytosis	50/1159	314/18903	4.80442e-10	3.8e-09	1.34992e-09	TNF/CD14/TLR4/IL1B/TLR2/CCL2/NOD2/MBL2/ALOX15/ITGB2/C3/ITGAL/F2RL1/ITGB3/ITGAM/SLC11A1/HMGB1/LYN/ADORA1/ITGB1/BTK/FYN/CLEC7A/SRC/SOD1/PLCG2/RAC2/APOA1/FPR2/ABCA1/LRP1/BECN1/DOCK1/PTPRC/ABL1/PRKCD/RAC1/THBS1/PTK2/RARA/PIP5K1A/PIK3CA/HCK/CDC42/LIMK1/PIKFYVE/SCARB1/SPHK1/MSR1/NR1H3	50	BP
GO:0032481	positive regulation of type I interferon production	20/1159	63/18903	5.1441e-10	4.06e-09	1.44162e-09	CD14/TLR4/TLR2/TLR9/IRF1/TLR3/STAT1/HSP90AA1/CHUK/IRAK1/PLCG2/MAVS/IFIH1/HSPD1/RIPK2/SETD2/TBK1/FLOT1/CGAS/OAS1	20	BP
GO:0032731	positive regulation of interleukin-1 beta production	20/1159	63/18903	5.1441e-10	4.06e-09	1.44162e-09	TNF/TLR4/IL6/NOD2/SMAD3/NOD1/NLRP3/F2RL1/CASP8/CLEC7A/CCL19/CASP1/JAK2/HSPB1/MALT1/RIPK2/NLRP1/EGR1/GSDMD/HK1	20	BP
GO:0002637	regulation of immunoglobulin production	22/1159	76/18903	5.21521e-10	4.11e-09	1.45966e-09	TNF/IL4R/IL4/TGFB1/IL6/IL33/TLR9/CD86/TNFSF4/BTK/TNFRSF4/TRAF6/TFRC/BCL6/PTPRC/CR1/PHB1/RBP4/TP53BP1/XBP1/CGAS/TNFSF13	22	BP
GO:0010586	miRNA metabolic process	24/1159	90/18903	5.57415e-10	4.39e-09	1.55807e-09	TNF/TGFB1/NR3C1/SMAD3/JUN/PPARG/NFKB1/FOS/FOXO3/TP53/BMP2/HIF1A/MYC/NR1H2/RELA/EGR1/PPARA/SMARCA4/POU5F1/RARA/TEAD1/LIN28A/PPARD/HRAS	24	BP
GO:0042307	positive regulation of protein import into nucleus	16/1159	40/18903	5.58121e-10	4.39e-09	1.55807e-09	TGFB1/PTGS2/SMAD3/CDH1/MAPK14/HSP90AA1/JAK2/SHH/MAVS/PRKCD/FLNA/HDAC3/BAG3/PIK3R1/RAN/CDK1	16	BP
GO:0002825	regulation of T-helper 1 type immune response	14/1159	30/18903	5.6526e-10	4.43e-09	1.57172e-09	IL12B/IL4R/IL33/IL1B/IL18/IL1R1/IL12RB1/CD80/SLC11A1/TNFSF4/CCR2/CCL19/JAK3/RIPK2	14	BP
GO:0071480	cellular response to gamma radiation	14/1159	30/18903	5.6526e-10	4.43e-09	1.57172e-09	TP53/ZMPSTE24/MDM2/EGR1/ATM/CDKN1A/BCL2L1/HSPA5/RAD51/ELK1/YAP1/CHEK2/ATR/HRAS	14	BP
GO:0045445	myoblast differentiation	27/1159	112/18903	5.6591e-10	4.43e-09	1.57172e-09	TNF/TGFB1/IL18/CCL17/CXCL10/MAPK14/ITGB1/SHH/GPX1/NOTCH1/IFRD1/DDIT3/NRG1/LGALS1/MAP3K5/PLCB1/SMARCA4/PLEC/ACTB/SMARCD2/BRD7/SDC1/JAG1/KAT5/EPAS1/TCF7L2/PPARD	27	BP
GO:0048259	regulation of receptor-mediated endocytosis	27/1159	112/18903	5.6591e-10	4.43e-09	1.57172e-09	IL4/SERPINE1/C3/ITGB3/SELE/ANGPT1/VEGFA/CCL19/PLCG2/TF/CLU/CCL21/ANXA2/ARRB1/DKK1/CD63/RAC1/INSR/DRD2/PPT1/ARF1/FLOT1/PCSK9/TNK2/PICALM/DRD3/AAK1	27	BP
GO:0051170	import into nucleus	34/1159	169/18903	6.48076e-10	5.07e-09	1.79762e-09	TGFB1/PTGS2/SMAD3/NFKBIA/ANGPT1/CDH1/MAPK14/HSP90AA1/JAK2/SHH/MAVS/RANBP6/TP53/NOTCH1/AKT1/CRY2/AGT/PRKCD/FLNA/HDAC3/CDKN1A/BAG3/TNPO1/KPNB1/PIK3R1/TRAF3IP2/RAN/IPO7/LRRK2/ELAVL1/STK4/SQSTM1/DRD1/CDK1	34	BP
GO:0060443	mammary gland morphogenesis	17/1159	46/18903	6.9863e-10	5.45e-09	1.93536e-09	NR3C1/ARG1/CSF1/NFKB1/VDR/AR/SRC/PTCH1/ESR1/CAV1/BAX/CSF1R/DDR1/CAPN1/EPHA2/RXFP1/PGR	17	BP
GO:0050918	positive chemotaxis	20/1159	64/18903	7.05444e-10	5.5e-09	1.95174e-09	CXCL8/CCL5/SMAD3/CCR4/CXCL10/MIF/F2RL1/HMGB1/ANGPT1/CXCL12/VEGFA/CX3CL1/CASR/FPR2/KDR/F3/S1PR1/CCL15/CDH13/PGF	20	BP
GO:0051101	regulation of DNA binding	28/1159	121/18903	7.49616e-10	5.84e-09	2.07131e-09	TGFB1/HMOX1/JUN/PPARG/HMGB1/NFKBIA/HDAC2/PARP1/MMP8/JAK2/CTNNB1/TRAF6/EP300/DDIT3/MAPK8/HMGA2/GZMA/NSD1/TNKS/ZMPSTE24/CSNK2B/PARK7/LEF1/HES1/NME1/E2F1/NEK2/CALM1	28	BP
GO:0030198	extracellular matrix organization	50/1159	318/18903	7.5277e-10	5.85e-09	2.07737e-09	TNF/TGFB1/IL6/SMAD3/ITGB3/MMP1/TPSAB1/MMP2/DPP4/ITGB1/CCN2/MMP8/MMP3/TGFBR1/TNFRSF1A/RUNX1/NFKB2/CAV1/NOTCH1/BMP2/MMP7/LRP1/COL1A1/CTSS/LOXL1/CYP1B1/COL2A1/ANXA2/COL1A2/AGT/ATP7A/ABL1/CFLAR/ADAMTS4/MMP14/ADAMTS1/DDR1/NOX1/DAG1/LAMA1/CTSK/MMP13/FOXC2/SERPINH1/PRSS1/DNAJB6/FLOT1/PDPN/RXFP1/LCP1	50	BP
GO:0045089	positive regulation of innate immune response	31/1159	145/18903	7.66168e-10	5.95e-09	2.11166e-09	IL12B/CCL5/TLR4/NOD2/TLR9/MBL2/CREBBP/HMGB1/LYN/HSP90AA1/FYN/CLEC7A/SRC/PLCG2/MAVS/IKBKB/TRAF6/EP300/FPR2/MAP3K7/PRKDC/IRGM/RASGRP1/HCK/TBK1/CGAS/KLRK1/IKBKE/HEXIM1/EREG/PAK3	31	BP
GO:0050714	positive regulation of protein secretion	29/1159	129/18903	7.75574e-10	6.02e-09	2.13486e-09	TGFB1/TLR4/TLR2/IL1A/PPARG/F2RL1/CD38/BMP6/JAK2/CASR/ANO1/HIF1A/FGG/NR1H2/ANG/TRPM2/ACHE/RBP4/GCG/PCSK1/PFKM/OSBP/TCF7L2/PPIA/GPR68/DNM1L/PPARD/GPER1/FFAR1	29	BP
GO:1905523	positive regulation of macrophage migration	13/1159	26/18903	7.95937e-10	6.17e-09	2.18814e-09	CCL5/C5AR1/CSF1/CX3CR1/MAPK3/MAPK1/CX3CL1/P2RY12/CSF1R/MMP14/THBS1/PTK2/CMKLR1	13	BP
GO:0043062	extracellular structure organization	50/1159	319/18903	8.40966e-10	6.51e-09	2.309e-09	TNF/TGFB1/IL6/SMAD3/ITGB3/MMP1/TPSAB1/MMP2/DPP4/ITGB1/CCN2/MMP8/MMP3/TGFBR1/TNFRSF1A/RUNX1/NFKB2/CAV1/NOTCH1/BMP2/MMP7/LRP1/COL1A1/CTSS/LOXL1/CYP1B1/COL2A1/ANXA2/COL1A2/AGT/ATP7A/ABL1/CFLAR/ADAMTS4/MMP14/ADAMTS1/DDR1/NOX1/DAG1/LAMA1/CTSK/MMP13/FOXC2/SERPINH1/PRSS1/DNAJB6/FLOT1/PDPN/RXFP1/LCP1	50	BP
GO:0034976	response to endoplasmic reticulum stress	44/1159	261/18903	8.55763e-10	6.61e-09	2.34608e-09	ALOX5/CXCL8/ALOX15/NFE2L2/JUN/CEBPB/ATP2A2/CCND1/TP53/CAV1/EP300/DDIT3/BAX/CLU/HSPA1A/SIRT1/ITPR1/MAP3K5/ATP2A3/NR1H2/ABL1/STUB1/CTH/CASP4/HYOU1/THBS1/HSP90B1/GSK3B/PARK7/BCL2L1/PIK3R1/BCL2L11/ATP2A1/HSPA5/LRRK2/XBP1/BAK1/FLOT1/TMX1/OPA1/PPP1R15A/PTPN1/NR1H3/HM13	44	BP
GO:0006006	glucose metabolic process	36/1159	188/18903	8.56637e-10	6.61e-09	2.34608e-09	TNF/NR3C1/MAPK14/SRC/GPT/KCNJ11/RORA/G6PD/RORC/TP53/EP300/ENO1/PKM/SIRT1/AKT1/CRY1/ZMPSTE24/KCNQ1/PPARA/PGK1/G6PC1/PPARGC1A/RBP4/INSR/GCG/PFKM/PIK3CA/ADIPOR1/HK1/PFKL/SLC25A1/FBP1/PRKAA1/OAS1/IRS1/PPARD	36	BP
GO:0043524	negative regulation of neuron apoptotic process	32/1159	154/18903	8.76668e-10	6.76e-09	2.3979e-09	CCL2/HMOX1/JUN/CX3CR1/ANGPT1/RHOA/F2R/CEBPB/SOD2/SOD1/CX3CL1/JAK2/LIG4/CCND1/BAX/HIF1A/KDR/GBA1/SIX1/HYOU1/NTRK1/PPARGC1A/PARK7/BCL2L1/PIK3CA/KRAS/PPT1/PTK2B/MAP2K4/ROCK1/HRAS/SNCA	32	BP
GO:0046942	carboxylic acid transport	47/1159	290/18903	8.80743e-10	6.78e-09	2.40601e-09	TNF/IL1B/NOS2/PTGS2/IL1A/ARG1/MIF/TRPV1/SLC11A1/ADORA1/ITGB1/ACE2/PLA2G2A/HRH3/ABCC1/CASR/PTGES/SLC6A12/GJA1/PSAP/NMUR2/AGT/GRM1/SLC1A5/SLCO1B1/SLC12A2/SLC26A6/CYP4F2/ABCG2/DRD2/SLC16A1/SLC7A11/SLC46A1/CES1/SLC25A1/ATP8B1/TRPC4/PRKAA1/DRD3/SLC7A5/SLCO1A2/SLC6A15/SLC27A1/GABBR1/SNCA/ABCC2/AKR1C1	47	BP
GO:0048762	mesenchymal cell differentiation	43/1159	252/18903	9.0387e-10	6.95e-09	2.46608e-09	TGFB1/IL6/IL1B/SMAD3/SMAD2/EDNRA/STAT1/HDAC2/MAPK3/TGFBR1/MAPK1/FGFR1/SHH/CTNNB1/MTOR/PTEN/NOTCH1/ERBB4/BMP2/HIF1A/COL1A1/NRG1/EDNRB/HMGA2/ACVR1/SIX1/FLNA/DAG1/GSK3B/SFRP1/PTK2/ALDH1A2/JAG1/LEF1/HES1/PEF1/FOXC2/ADIPOR1/ROCK2/CDC42/TCF7L2/PDPN/ROCK1	43	BP
GO:0010657	muscle cell apoptotic process	24/1159	92/18903	9.09947e-10	6.99e-09	2.47954e-09	IL12B/HMOX1/NFE2L2/PPARG/CXCR2/HSP90AA1/ATP2A2/SOD2/JAK2/TP53/SIRT1/CDKN2A/PDPK1/MAP3K5/AGT/IGF1R/CFLAR/BAG3/LTK/DNMT1/CAPN2/PTK2B/MAP2K4/SLC7A5	24	BP
GO:0034103	regulation of tissue remodeling	23/1159	85/18903	9.28281e-10	7.12e-09	2.52632e-09	IL12B/TGFB1/IL6/IL18/PPARG/ITGB3/PRKCA/CD38/SRC/CALCA/SPP1/RUNX1/TFRC/TP53/TF/MC4R/S1PR1/CSF1R/AGT/SFRP1/ROCK2/INPP5D/ROCK1	23	BP
GO:0001885	endothelial cell development	20/1159	65/18903	9.6071e-10	7.33e-09	2.6015e-09	TNF/IL1B/ICAM1/EDNRA/PDE4D/F2RL1/VEGFA/TNFRSF1A/IKBKB/GPX1/RAPGEF3/EDNRB/TJP1/PLCB1/S1PR3/ROCK2/ROCK1/S1PR2/HPSE/RAP1A	20	BP
GO:0006940	regulation of smooth muscle contraction	20/1159	65/18903	9.6071e-10	7.33e-09	2.6015e-09	ADRB2/PTGS2/CHRM3/TACR1/ADORA1/RHOA/F2R/SOD1/PRKG1/CALCA/CAV1/NMUR2/KIT/ADRA2A/P2RX1/KCNMA1/ADRA1A/SPHK1/GPER1/ADRA2C	20	BP
GO:0032613	interleukin-10 production	20/1159	65/18903	9.6071e-10	7.33e-09	2.6015e-09	IL12B/IL4/TLR4/IL6/TLR2/NOD2/TLR9/F2RL1/HMGB1/TNFSF4/IDO1/BTK/MMP8/CLEC7A/PLCG2/JAK3/HSPD1/VSIR/CD274/PDCD1LG2	20	BP
GO:0032653	regulation of interleukin-10 production	20/1159	65/18903	9.6071e-10	7.33e-09	2.6015e-09	IL12B/IL4/TLR4/IL6/TLR2/NOD2/TLR9/F2RL1/HMGB1/TNFSF4/IDO1/BTK/MMP8/CLEC7A/PLCG2/JAK3/HSPD1/VSIR/CD274/PDCD1LG2	20	BP
GO:0002223	stimulatory C-type lectin receptor signaling pathway	12/1159	22/18903	9.72459e-10	7.38e-09	2.62078e-09	CREBBP/LYN/FYN/CLEC7A/SRC/PLCG2/IKBKB/TRAF6/EP300/MAP3K7/KLRK1/PAK3	12	BP
GO:1990840	response to lectin	12/1159	22/18903	9.72459e-10	7.38e-09	2.62078e-09	CREBBP/LYN/FYN/CLEC7A/SRC/PLCG2/IKBKB/TRAF6/EP300/MAP3K7/KLRK1/PAK3	12	BP
GO:1990858	cellular response to lectin	12/1159	22/18903	9.72459e-10	7.38e-09	2.62078e-09	CREBBP/LYN/FYN/CLEC7A/SRC/PLCG2/IKBKB/TRAF6/EP300/MAP3K7/KLRK1/PAK3	12	BP
GO:0010039	response to iron ion	14/1159	31/18903	9.72668e-10	7.38e-09	2.62078e-09	HMOX1/BMP6/CYP1A1/G6PD/CCND1/TFRC/TF/HIF1A/BECN1/ATP7A/DRD2/SLC40A1/MAP1LC3A/SNCA	14	BP
GO:0032963	collagen metabolic process	26/1159	107/18903	9.7836e-10	7.42e-09	2.63284e-09	TGFB1/IL6/ARG1/MMP1/HDAC2/MMP2/ITGB1/CCN2/MMP8/F2R/MMP3/RUNX1/MMP7/HIF1A/COL1A1/CTSS/VSIR/F2/COL1A2/MMP14/CTSB/CTSK/MMP13/PDGFRB/SERPINH1/PPARD	26	BP
GO:0022898	regulation of transmembrane transporter activity	47/1159	291/18903	9.89538e-10	7.49e-09	2.65962e-09	ADRB2/CCL2/TLR9/NOS1/EDNRA/PDE4D/CHRM3/IFNGR2/CRHR1/CCR2/ABCB1/ITGB1/ACE2/OPRM1/PDE4B/NPPA/PLCG2/ABCC8/CAV1/GSTO1/CTSS/ATP7A/ADRA2A/KCNQ1/OXSR1/ACTB/PARK7/GRM5/CAPN1/WNK1/KCNK3/CACNA2D1/RIPK1/DRD2/ATP2A1/SPHK2/KCNA1/PRKACA/PTK2B/PCSK9/CRBN/DRD3/SLMAP/PIM1/SNCA/CALM1/KCNE1	47	BP
GO:0045601	regulation of endothelial cell differentiation	17/1159	47/18903	1.03229e-09	7.8e-09	2.76766e-09	TNF/IL1B/XDH/VEGFA/BMP6/TNFRSF1A/CTNNB1/IKBKB/ACVRL1/NOTCH1/PLCB1/JAG1/S1PR3/ROCK2/ROCK1/S1PR2/ZEB1	17	BP
GO:1902895	positive regulation of miRNA transcription	17/1159	47/18903	1.03229e-09	7.8e-09	2.76766e-09	TNF/TGFB1/NR3C1/SMAD3/JUN/PPARG/FOS/FOXO3/TP53/BMP2/HIF1A/MYC/NR1H2/RELA/EGR1/SMARCA4/TEAD1	17	BP
GO:0098869	cellular oxidant detoxification	25/1159	100/18903	1.07929e-09	8.14e-09	2.89009e-09	GSTP1/PTGS2/NOS3/ALB/PTGS1/NFE2L2/GSTT1/NQO1/SOD2/SOD1/GSTA1/GPX1/GSTO1/PTGES/GPX4/PRDX6/ATP7A/PRDX5/GSTK1/DUOX1/FABP1/PARK7/PRDX1/MGST1/PRDX2	25	BP
GO:0048260	positive regulation of receptor-mediated endocytosis	18/1159	53/18903	1.09218e-09	8.22e-09	2.9174e-09	IL4/SERPINE1/C3/SELE/ANGPT1/VEGFA/CCL19/PLCG2/TF/CLU/CCL21/ANXA2/ARRB1/CD63/INSR/DRD2/PPT1/PCSK9	18	BP
GO:0097300	programmed necrotic cell death	18/1159	53/18903	1.09218e-09	8.22e-09	2.9174e-09	TNF/TLR3/CASP8/PARP1/FAS/TP53/CAV1/BAX/BIRC3/MAP3K5/CFLAR/RIPK1/BIRC2/RNF31/PYGL/ITPK1/TRPM7/DNM1L	18	BP
GO:0042770	signal transduction in response to DNA damage	35/1159	181/18903	1.11603e-09	8.39e-09	2.97744e-09	MIF/MAPK14/FOXO3/MUC1/CCND1/TP53/CDK2/CD44/SIRT1/CRY1/ABL1/ZMPSTE24/MDM2/PRKDC/ATM/TOPBP1/CHEK1/NBN/CDKN1A/BID/PLK1/CASP9/MRE11/TP53BP1/KAT5/FZR1/BRCA1/E2F1/RAD51/GRB2/CHEK2/ATR/CDK1/CD74/TAOK1	35	BP
GO:0071482	cellular response to light stimulus	28/1159	123/18903	1.11861e-09	8.4e-09	2.98065e-09	PTGS2/CREBBP/MMP1/MMP2/MME/PARP1/MMP3/TP53/EP300/BAX/SIRT1/MYC/HYAL1/CRY1/CRY2/MC1R/PRKCD/CHEK1/AQP1/CDKN1A/CASP9/ERCC1/PIK3R1/BAK1/GRK1/NMT1/ATR/KCNE1	28	BP
GO:0008544	epidermis development	54/1159	362/18903	1.12954e-09	8.47e-09	3.00607e-09	TNF/IL1A/HDAC2/EGFR/CCN2/VDR/HDAC1/CASP3/ATP2A2/SOD1/PTCH1/SHH/TGM1/ST14/CTNNB1/CYP27B1/AKR1C3/NOTCH1/TGM3/PTHLH/DKK1/RELA/ATP7A/ZMPSTE24/KCNQ1/PPARA/PLEC/MAP2K1/INSR/PLOD1/PDGFA/SULT2B1/PIP5K1A/SOS1/FLNB/JAG1/HES1/CDH3/SFN/YBX1/STK4/EPHA2/ROCK2/PRKCH/NCOA3/SLC44A4/SHARPIN/KRT81/EREG/ROCK1/YAP1/PPARD/KEAP1/HPSE	54	BP
GO:0055067	monovalent inorganic cation homeostasis	33/1159	164/18903	1.14852e-09	8.6e-09	3.05284e-09	IL1A/EDNRA/SLC11A1/TACR1/ADORA1/MAPK3/MAPK1/ATP4A/SCNN1A/EDNRB/AGTR1/AGT/KCNQ1/SCNN1G/NOX1/SLC12A2/SLC26A6/SLC8A1/SCNN1B/CYP4F2/KCNMA1/WNK1/ATP1A1/DRD2/LRRK2/CA2/SLC12A1/AVPR2/ATP6V1B1/PPT1/DRD3/CCKBR/NPR1	33	BP
GO:0051781	positive regulation of cell division	24/1159	93/18903	1.15598e-09	8.65e-09	3.06889e-09	TGFB1/IL1B/IL1A/RHOA/VEGFA/SHH/CXCR5/TGFA/IGF1R/KIF23/PDGFA/FGF5/DRD2/SSTR5/YBX1/CDC42/FGF4/CDC25B/DRD3/KIF20B/EREG/FGF1/RXFP3/PGF	24	BP
GO:0030900	forebrain development	56/1159	383/18903	1.18421e-09	8.85e-09	3.13998e-09	ITGAM/EGFR/CREB1/CXCL12/CDH1/CXCR4/RHOA/HDAC1/FYN/CASP3/SRC/PRKG1/SHH/CTNNB1/PTEN/NOTCH1/ERBB4/BMP2/BAX/HIF1A/NRG1/P2RY12/DCLK1/CSF1R/DKK1/ATP7A/PLCB1/IGF1R/SLC2A1/DLC1/AQP1/HSD3B1/AGTPBP1/GSK3B/ALDH1A2/SLC8A1/PCSK1/RARA/HPRT1/LEF1/HES1/DRD2/LRRK2/RARB/SLC7A11/KRAS/AVPR2/KCNA1/SETD2/E2F1/DRD1/TOP2B/EZH1/CCKAR/SRD5A1/ZEB1	56	BP
GO:0014812	muscle cell migration	26/1159	108/18903	1.2144e-09	9.04e-09	3.20826e-09	CCL5/TLR4/SERPINE1/NFE2L2/ITGB3/TACR1/RHOA/SRC/PRKG1/DDIT3/LRP1/CYP1B1/AGT/SIX1/ATP7A/ADAMTS1/DDR1/PDGFA/APEX1/PDGFRB/TPM1/RPS6KB1/NR4A3/ROCK1/S1PR2/PPARD	26	BP
GO:0044106	cellular amine metabolic process	26/1159	108/18903	1.2144e-09	9.04e-09	3.20826e-09	HNMT/ITGB2/EDNRA/ITGAM/ALDH2/AOC1/IDO1/SULT1A1/PNMT/ATP7A/MAOB/PARK7/HPRT1/DRD2/PAH/SLC7A11/EPAS1/DRD1/BHMT/GRIN2A/DRD3/SNCA/MAOA/GPR37/IDO2/NPR1	26	BP
GO:0090398	cellular senescence	26/1159	108/18903	1.2144e-09	9.04e-09	3.20826e-09	MIF/MAPK14/PTEN/TP53/CDK2/MAPK8/HMGA2/SIRT1/CDKN2A/MAP3K5/BCL6/ABL1/ZMPSTE24/PRKCD/IGF1R/ATM/MAPK10/CDKN1A/MAP2K1/KAT5/FZR1/YBX1/CGAS/MAP2K4/OPA1/HRAS	26	BP
GO:0060485	mesenchyme development	49/1159	313/18903	1.29396e-09	9.62e-09	3.41428e-09	TGFB1/IL6/IL1B/SMAD3/NOS3/SMAD2/EDNRA/STAT1/HDAC2/MAPK3/TGFBR1/MAPK1/FGFR1/SHH/CTNNB1/MTOR/PTEN/ACVRL1/NOTCH1/ERBB4/BMP2/HIF1A/COL1A1/NRG1/EDNRB/HMGA2/MYC/ACVR1/SIX1/MDM2/FLNA/DAG1/GSK3B/SFRP1/PTK2/ALDH1A2/PDGFRB/JAG1/LEF1/HES1/PEF1/FOXC2/ADIPOR1/ROCK2/CDC42/TCF7L2/PDPN/ROCK1/YAP1	49	BP
GO:0030518	intracellular steroid hormone receptor signaling pathway	27/1159	116/18903	1.30895e-09	9.72e-09	3.44962e-09	NR3C1/PARP1/RHOA/HDAC1/AR/SRC/JAK2/ESR1/EP300/NR3C2/SIRT1/CRY1/CRY2/PHB1/SKP2/SMARCA4/SFRP1/PARK7/HDAC6/KDM4C/ESR2/BRCA1/DNAJA1/EGLN2/YAP1/GPER1/PGR	27	BP
GO:0071326	cellular response to monosaccharide stimulus	30/1159	140/18903	1.35367e-09	1e-08	3.56315e-09	ICAM1/FOXO3/CASR/GPX1/ANO1/HIF1A/NR1D1/PRKAA2/NOX4/ADRA2A/PLCB1/IGF1R/RAF1/SMARCA4/OPRK1/NCF1/MEN1/SLC26A6/GCG/KAT5/PIK3CA/XBP1/PRKACA/SERPINF1/OSBP/PRKAA1/LIN28A/GPR68/PPARD/GPER1	30	BP
GO:0031214	biomineral tissue development	34/1159	174/18903	1.44746e-09	1.07e-08	3.79984e-09	ADRB2/ALOX5/TGFB1/PTGS2/SMAD3/NOS3/ALOX15/LTF/VDR/CCR1/CEBPB/BMP6/ENPP1/CYP27B1/SPP1/NOTCH1/BMP2/HIF1A/COL1A1/PTHLH/S1PR1/COL1A2/ACVR1/ZMPSTE24/PPARA/ALPL/ATG4B/MMP13/RXRB/SLC8A1/ROCK2/PTK2B/ROCK1/KLF10	34	BP
GO:0002407	dendritic cell chemotaxis	13/1159	27/18903	1.44885e-09	1.07e-08	3.79984e-09	CCL5/CCR5/HMGB1/CXCR1/CCR2/CXCR2/CCR6/CXCR4/CCR7/CCR1/CCL19/CCL21/TRPM2	13	BP
GO:0071549	cellular response to dexamethasone stimulus	13/1159	27/18903	1.44885e-09	1.07e-08	3.79984e-09	NR3C1/ARG1/JAK2/IGF1R/CFLAR/SMYD3/AQP1/EIF4E/CASP9/RPS6KB1/SERPINF1/BMI1/SRD5A1	13	BP
GO:0002886	regulation of myeloid leukocyte mediated immunity	19/1159	60/18903	1.46048e-09	1.08e-08	3.82572e-09	IL4R/IL4/HMOX1/ITGB2/ARG1/C3/CX3CR1/F2RL1/ITGAM/LYN/CCR2/BTK/MAVS/RAC2/PDPK1/DDX1/CXCL6/DNASE1/SPHK2	19	BP
GO:0032970	regulation of actin filament-based process	58/1159	406/18903	1.46402e-09	1.08e-08	3.83034e-09	CCL24/SMAD3/CCL26/IL1A/ALOX15/PDE4D/F2RL1/ITGB3/TACR1/CXCL12/ADORA1/CCR7/CCN2/RHOA/PDE4B/TGFBR1/ATP2A2/CX3CL1/MTOR/RAC2/CAV1/APOA1/LRP1/RAPGEF3/CCL21/CACNA1C/TJP1/S1PR1/HAX1/CSF1R/ABL1/PRKCD/FLNA/RAC1/DLC1/TEK/TRPM2/BST1/SFRP1/PDGFA/PDGFRB/PIK3R1/ATP2A1/TPM1/PIK3CA/HCK/ROCK2/CDC42/LIMK1/ARF1/PTK2B/PDPN/ROCK1/GRB2/HRAS/PAK3/ARHGDIA/TAOK1	58	BP
GO:0046545	development of primary female sexual characteristics	26/1159	109/18903	1.50302e-09	1.11e-08	3.92292e-09	NOS3/MMP2/VEGFA/CASP3/CEBPB/SRC/SOD1/ESR1/FOXO3/BAX/KDR/ADCYAP1R1/SIRT1/CTNNA1/KIT/MMP14/ATM/ADAMTS1/ANG/SFRP1/INSR/BCL2L1/HSPA5/AFP/EREG/PGR	26	BP
GO:0046822	regulation of nucleocytoplasmic transport	26/1159	109/18903	1.50302e-09	1.11e-08	3.92292e-09	TGFB1/IL1B/PTGS2/SMAD3/ANGPT1/CDH1/MAPK14/HSP90AA1/JAK2/SHH/MAVS/RAPGEF3/PRKCD/FLNA/HDAC3/GSK3B/BAG3/PARK7/PIK3R1/RAN/XPO1/SFN/SETD2/PRKACA/TCF7L2/CDK1	26	BP
GO:0002673	regulation of acute inflammatory response	17/1159	48/18903	1.50753e-09	1.11e-08	3.92995e-09	TNF/IL4/IL6/GSTP1/IL1B/PTGS2/NLRP3/C3/ADORA1/BTK/CCR7/PTGES/EDNRB/CNR1/DNASE1/PARK7/F12	17	BP
GO:0010660	regulation of muscle cell apoptotic process	23/1159	87/18903	1.5305e-09	1.12e-08	3.98503e-09	IL12B/HMOX1/NFE2L2/PPARG/CXCR2/ATP2A2/SOD2/JAK2/TP53/SIRT1/CDKN2A/PDPK1/MAP3K5/AGT/IGF1R/CFLAR/BAG3/LTK/DNMT1/CAPN2/PTK2B/MAP2K4/SLC7A5	23	BP
GO:0007588	excretion	15/1159	37/18903	1.54995e-09	1.13e-08	4.02601e-09	TRPV1/TACR1/ADORA1/EDNRB/AGTR1/AGT/ABCG2/KCNMA1/DRD2/ADRA1A/AVPR2/SLC22A12/ATP6V1B1/DRD3/NPR1	15	BP
GO:0071276	cellular response to cadmium ion	15/1159	37/18903	1.54995e-09	1.13e-08	4.02601e-09	HMOX1/JUN/EGFR/CYP1A2/MAPK3/CHUK/FOS/SOD1/MAPK1/CYBB/AKR1C3/MAPK8/AKT1/ATP7A/NCF1	15	BP
GO:0001505	regulation of neurotransmitter levels	39/1159	219/18903	1.55217e-09	1.13e-08	4.02693e-09	HNMT/NOS1/ITGB3/ITGB1/HRH3/ATP2A2/SLC6A12/ADRA2A/DVL1/MAOB/NR4A1/CNR1/ACHE/AGTPBP1/GSK3B/P2RX1/PARK7/P2RY1/ASIC1/SEPTIN5/DRD2/PAH/SLC22A1/LRRK2/ADRA1A/PPT1/DRD1/FLOT1/BCHE/ADCY1/DRD3/SLC18A1/SLC44A4/GABRA2/GPER1/SNCA/GAD1/MAOA/RAP1A	39	BP
GO:0051250	negative regulation of lymphocyte activation	33/1159	166/18903	1.59077e-09	1.16e-08	4.12213e-09	IL4R/IL4/IRF1/CD86/ARG1/CD80/HMGB1/LYN/TNFSF4/IDO1/BTK/CASP3/CEBPB/SHH/JAK3/PTEN/RUNX1/ERBB2/VSIR/CD274/BCL6/CR1/PDCD1LG2/ATM/IFNA2/SFRP1/ITCH/PTPN6/PRDX2/PDE5A/INPP5D/DUSP22/CD74	33	BP
GO:0031647	regulation of protein stability	50/1159	325/18903	1.61524e-09	1.18e-08	4.18055e-09	SMAD3/CREBBP/CREB1/HSP90AA1/CASP3/SRC/MAPK1/PTEN/TP53/APOA1/EP300/TF/BMP2/NR1D1/HSPD1/CLU/HSPA1A/SIRT1/PIN1/MDM2/PRKCD/PHB1/FLNA/PRKDC/STUB1/DVL1/HDAC3/HSPA8/PPARGC1A/PLK1/BAG3/IRGM/PARK7/RUVBL1/CCT8/PIK3R1/HDAC6/CD81/LRRK2/KRAS/STK4/AURKA/CCT5/PEX2/FLOT1/HDAC8/PIM1/CHEK2/SNCA/AAK1	50	BP
GO:0002758	innate immune response-activating signal transduction	14/1159	32/18903	1.63175e-09	1.19e-08	4.20818e-09	MBL2/CREBBP/LYN/FYN/CLEC7A/SRC/PLCG2/IKBKB/TRAF6/EP300/MAP3K7/HCK/KLRK1/PAK3	14	BP
GO:1901889	negative regulation of cell junction assembly	14/1159	32/18903	1.63175e-09	1.19e-08	4.20818e-09	TNF/IL1B/TLR2/SRC/IKBKB/PTEN/ACVRL1/DKK1/MMP14/DLC1/THBS1/ROCK2/DUSP22/ROCK1	14	BP
GO:1990776	response to angiotensin	14/1159	32/18903	1.63175e-09	1.19e-08	4.20818e-09	PTGS2/NFE2L2/NFKB1/SRC/CYBB/CAV1/AGTR1/AGT/RELA/PRKCD/IGF1R/CA2/ROCK2/ROCK1	14	BP
GO:0001101	response to acid chemical	29/1159	133/18903	1.6568e-09	1.2e-08	4.26264e-09	TNF/ARG1/NQO1/LYN/EGFR/MMP2/CCN2/RHOA/VEGFA/FYN/CASP3/CEBPB/MTOR/CYBB/COL1A1/COL1A2/SIX1/ATP7A/IGF1R/PLEC/NTRK1/BCL2L1/DNMT1/CAPN2/PIK3CA/XBP1/RPS6KB1/SLC7A5/ZEB1	29	BP
GO:0035303	regulation of dephosphorylation	29/1159	133/18903	1.6568e-09	1.2e-08	4.26264e-09	TNF/TGFB1/SMAD3/ADORA1/SRC/JAK2/MTOR/IKBKB/BMP2/PIN1/CRY2/PTPRC/GBA1/PRKCD/CSNK2B/DLC1/PTBP1/HSP90B1/GSK3B/YWHAB/PDGFRB/DRD2/ROCK2/PPP1R15A/PPIA/ROCK1/ITGA1/CALM1/CHRM5	29	BP
GO:0016042	lipid catabolic process	51/1159	336/18903	1.78578e-09	1.29e-08	4.58903e-09	TNF/PLA2G7/IL1B/ADORA1/CYP3A4/CYP1A2/PLA2G2A/CYP27B1/PLCG2/SPP1/AKR1C3/NEU1/APOA1/ABHD5/CYP1B1/AKT1/PLCB3/GBA1/PRDX6/ADRA2A/PLCB1/PRKCD/CYP26A1/PPARA/HEXB/CNR1/HSD17B4/HSD11B1/FABP1/CYP4F2/THRA/HAO1/CDK4/PLD1/CES1/PPT1/PEX2/FUCA1/SCARB1/PRKAA1/PNPLA2/MGLL/BDH2/PLA2G15/HPGD/SPHK1/IRS1/PPARD/SRD5A1/PLCG1/DPEP1	51	BP
GO:0007612	learning	31/1159	150/18903	1.84341e-09	1.33e-08	4.73059e-09	TLR2/PTGS2/TACR1/ITGB1/FYN/FOS/ABCC8/HIF1A/RAPGEF3/YTHDF1/DKK1/AGT/KIT/ABL1/PLCB1/VDAC1/OPRK1/HMGCR/INSR/GRM5/ASIC1/KMT2A/DRD2/SLC7A11/KRAS/PPT1/DRD1/BCHE/GRIN2A/DRD3/TPBG	31	BP
GO:0014909	smooth muscle cell migration	24/1159	95/18903	1.84523e-09	1.33e-08	4.73059e-09	CCL5/TLR4/SERPINE1/NFE2L2/ITGB3/TACR1/RHOA/SRC/PRKG1/DDIT3/LRP1/CYP1B1/AGT/ATP7A/ADAMTS1/DDR1/PDGFA/APEX1/PDGFRB/TPM1/RPS6KB1/NR4A3/S1PR2/PPARD	24	BP
GO:0045624	positive regulation of T-helper cell differentiation	12/1159	23/18903	1.91972e-09	1.39e-08	4.91575e-09	IL12B/IL4R/IL18/NLRP3/CD86/IL12RB1/CD80/TNFSF4/CCL19/MALT1/RIPK2/RARA	12	BP
GO:0046889	positive regulation of lipid biosynthetic process	23/1159	88/18903	1.95315e-09	1.41e-08	4.99544e-09	TNF/IL1B/PTGS2/IL1A/CREB1/BMP6/MTOR/APOA1/NR1D1/AKT1/NR1H2/PRKCD/IGF1R/PPARA/KAT5/CAPN2/SPHK2/SCARB1/PRKAA1/SLC27A1/FGF1/NR1H3/CD74	23	BP
GO:0043467	regulation of generation of precursor metabolites and energy	29/1159	134/18903	1.99245e-09	1.43e-08	5.08995e-09	TNF/IL4/NOS2/RHOA/ENPP1/MTOR/TP53/IL10RB/EP300/HIF1A/PRKAA2/AKT1/IFNAR1/ATP7A/PPARA/PPARGC1A/GSK3B/INSR/PARK7/ARNT/PIK3CA/SPHK2/FBP1/PRKAA1/PRDM16/TRAP1/IRS1/SNCA/CDK1	29	BP
GO:0032930	positive regulation of superoxide anion generation	11/1159	19/18903	2.10487e-09	1.51e-08	5.37082e-09	TGFB1/GSTP1/ITGB2/F2RL1/ITGAM/CLEC7A/SOD1/FPR2/AGT/PRKCD/MAPT	11	BP
GO:0033628	regulation of cell adhesion mediated by integrin	17/1159	49/18903	2.17721e-09	1.56e-08	5.54886e-09	CCL5/SERPINE1/ITGB3/LYN/DPP4/MUC1/CCL21/CYP1B1/P2RY12/CXCL13/PTK2/PTPN6/WNK1/FOXC2/EPHA2/PIEZO1/CIB1	17	BP
GO:0061517	macrophage proliferation	9/1159	12/18903	2.20974e-09	1.58e-08	5.62515e-09	IL33/CSF1/MAPK3/MAPK1/CX3CL1/CLU/CSF1R/GBA1/PTK2	9	BP
GO:0045670	regulation of osteoclast differentiation	20/1159	68/18903	2.33308e-09	1.67e-08	5.93215e-09	TNF/IL12B/IL4/TLR4/CSF1/TLR3/CREB1/LTF/CCR1/CEBPB/FOS/CTNNB1/MTOR/TRAF6/SFRP1/PIK3R1/INPP5D/GPR68/ESRRA/KLF10	20	BP
GO:0002708	positive regulation of lymphocyte mediated immunity	27/1159	119/18903	2.38878e-09	1.71e-08	6.06666e-09	TNF/IL12B/IL4/TGFB1/IL6/IL1B/IL18/LTA/NOD2/IL1R1/NLRP3/C3/IL12RB1/TNFSF4/BTK/TRAF6/TFRC/HSPD1/MALT1/PTPRC/MAP3K7/TP53BP1/CD81/RASGRP1/KLRK1/HLA-DRB3/TNFSF13	27	BP
GO:0002709	regulation of T cell mediated immunity	23/1159	89/18903	2.48265e-09	1.77e-08	6.29031e-09	IL12B/IL4/IL6/IL1B/IL18/NOD2/IL1R1/NLRP3/ARG1/IL12RB1/HMGB1/TNFSF4/CCR2/AHR/TRAF6/HSPD1/MALT1/PTPRC/MAP3K7/IFNA2/CD81/DUSP22/HLA-DRB3	23	BP
GO:0034644	cellular response to UV	23/1159	89/18903	2.48265e-09	1.77e-08	6.29031e-09	PTGS2/CREBBP/MMP1/MMP2/MME/PARP1/MMP3/TP53/EP300/BAX/SIRT1/MYC/HYAL1/MC1R/PRKCD/CHEK1/AQP1/CDKN1A/CASP9/ERCC1/PIK3R1/BAK1/ATR	23	BP
GO:0016239	positive regulation of macroautophagy	21/1159	75/18903	2.51781e-09	1.8e-08	6.37194e-09	ADRB2/IL4/NOD2/NOD1/HMOX1/MAPK3/HIF1A/KDR/PRKAA2/SIRT1/RIPK2/BECN1/IKBKG/MAP3K7/VDAC1/BAG3/IRGM/SPTLC1/RNF31/TBK1/PIP4K2A	21	BP
GO:1905897	regulation of response to endoplasmic reticulum stress	22/1159	82/18903	2.5596e-09	1.82e-08	6.47013e-09	ALOX5/NFE2L2/CAV1/DDIT3/BAX/CLU/HSPA1A/SIRT1/NR1H2/HYOU1/PARK7/BCL2L1/PIK3R1/BCL2L11/HSPA5/LRRK2/XBP1/BAK1/OPA1/PPP1R15A/PTPN1/NR1H3	22	BP
GO:0006694	steroid biosynthetic process	34/1159	178/18903	2.68482e-09	1.91e-08	6.77876e-09	TNF/NR3C1/IL1A/NFKB1/CYP3A4/SOD1/BMP6/CYP27B1/CYP1A1/G6PD/AKR1C3/APOA1/BMP2/EBP/NR1D1/PRKAA2/SIRT1/AKR1B1/IGF1R/EGR1/HSD3B1/HMGCR/CYP21A2/ATP1A1/CYP17A1/CACNA1H/DHCR24/CES1/OSBP/PRKAA1/HSD17B1/FGF1/SRD5A1/FDPS	34	BP
GO:0006576	cellular biogenic amine metabolic process	24/1159	97/18903	2.90438e-09	2.06e-08	7.31605e-09	HNMT/ITGB2/EDNRA/ITGAM/ALDH2/AOC1/IDO1/SULT1A1/PNMT/ATP7A/MAOB/PARK7/HPRT1/DRD2/PAH/EPAS1/DRD1/GRIN2A/DRD3/SNCA/MAOA/GPR37/IDO2/NPR1	24	BP
GO:0006942	regulation of striated muscle contraction	24/1159	97/18903	2.90438e-09	2.06e-08	7.31605e-09	NOS1/PDE4D/ADORA1/CCN2/ACE2/HSP90AA1/PDE4B/ATP2A2/NPPA/CAV1/GSTO1/SCN4A/CACNA1C/KCNQ1/NR4A1/SLC8A1/MYH7/ATP1A1/PDE5A/ATP2A1/ADRA1A/PRKACA/GRK2/CALM1	24	BP
GO:0050868	negative regulation of T cell activation	28/1159	128/18903	2.92139e-09	2.07e-08	7.35035e-09	IL4R/IL4/IRF1/CD86/ARG1/CD80/HMGB1/TNFSF4/IDO1/CASP3/CEBPB/SHH/JAK3/PTEN/RUNX1/ERBB2/VSIR/CD274/BCL6/CR1/PDCD1LG2/IFNA2/ITCH/PTPN6/PRDX2/PDE5A/DUSP22/CD74	28	BP
GO:1905521	regulation of macrophage migration	16/1159	44/18903	2.92985e-09	2.07e-08	7.36308e-09	CCL5/MIF/C5AR1/CSF1/CX3CR1/MAPK3/MAPK1/CX3CL1/P2RY12/CSF1R/MMP14/THBS1/PTK2/CD81/PTK2B/CMKLR1	16	BP
GO:0001954	positive regulation of cell-matrix adhesion	18/1159	56/18903	3.00986e-09	2.12e-08	7.53794e-09	SMAD3/CSF1/ITGB3/CCR7/VEGFA/CX3CL1/KDR/CCL21/ABL1/RAC1/TEK/CDH13/DAG1/GSK3B/SFRP1/PTK2B/ROCK1/CIB1	18	BP
GO:0010718	positive regulation of epithelial to mesenchymal transition	18/1159	56/18903	3.00986e-09	2.12e-08	7.53794e-09	TGFB1/IL6/IL1B/SMAD3/SMAD2/HDAC2/TGFBR1/CTNNB1/MTOR/NOTCH1/BMP2/COL1A1/ACVR1/PTK2/JAG1/LEF1/TCF7L2/PDPN	18	BP
GO:0043551	regulation of phosphatidylinositol 3-kinase activity	18/1159	56/18903	3.00986e-09	2.12e-08	7.53794e-09	TGFB1/NOD2/LYN/CCR7/FLT1/SRC/CCL19/CCL21/P2RY12/KIT/TEK/PTK2/PDGFRB/PIK3R1/CDC42/PTK2B/IRS1/CCKBR	18	BP
GO:0051349	positive regulation of lyase activity	17/1159	50/18903	3.11136e-09	2.19e-08	7.78313e-09	ADRB2/NOS2/NOS3/NOS1/EDNRA/CRHR1/ADORA3/CALCA/ORAI1/ADRB1/CACNA1C/GLP1R/RAF1/PARK7/AVPR2/DRD1/RXFP1	17	BP
GO:0008585	female gonad development	25/1159	105/18903	3.22408e-09	2.27e-08	8.05579e-09	NOS3/MMP2/VEGFA/CASP3/CEBPB/SRC/SOD1/ESR1/FOXO3/BAX/KDR/SIRT1/CTNNA1/KIT/MMP14/ATM/ADAMTS1/ANG/SFRP1/INSR/BCL2L1/HSPA5/AFP/EREG/PGR	25	BP
GO:0007229	integrin-mediated signaling pathway	26/1159	113/18903	3.43005e-09	2.41e-08	8.56058e-09	ITGB2/ITGAL/ITGB3/ITGAM/ITGB1/CCN2/SRC/ITGB4/APOA1/LAT/DOCK1/CTNNA1/ABL1/FLNA/CD63/ADAMTS1/LAMA1/BST1/PTK2/ITGA2B/HCK/CDC42/PTK2B/ILK/MADCAM1/ITGA1	26	BP
GO:0098754	detoxification	31/1159	154/18903	3.6069e-09	2.53e-08	8.99157e-09	GSTM1/GSTP1/PTGS2/NOS3/ALB/PTGS1/NFE2L2/GSTT1/NQO1/ABCB1/SOD2/SOD1/GSTA1/ADH5/GPX1/GSTO1/PTGES/GPX4/PRDX6/ATP7A/PRDX5/GSTK1/DUOX1/FABP1/PARK7/PRDX1/MGST1/ABCG2/PRDX2/PIM1/AKR1A1	31	BP
GO:0045453	bone resorption	19/1159	63/18903	3.67149e-09	2.58e-08	9.14208e-09	ADRB2/IL6/ITGB3/PRKCA/CD38/SRC/CALCA/CTNNB1/SPP1/TRAF6/TFRC/TF/MC4R/S1PR1/CSF1R/NOX4/CTSK/PTK2B/INPP5D	19	BP
GO:0001990	regulation of systemic arterial blood pressure by hormone	15/1159	39/18903	3.70418e-09	2.59e-08	9.19178e-09	NOS3/F2RL1/TACR1/ACE2/RHOA/F2R/HSD11B2/EDNRB/AGTR1/AGT/ECE1/REN/NOX1/AVPR2/SUCNR1	15	BP
GO:0043618	regulation of transcription from RNA polymerase II promoter in response to stress	15/1159	39/18903	3.70418e-09	2.59e-08	9.19178e-09	HMOX1/NFE2L2/JUN/VEGFA/CEBPB/MUC1/TP53/DDIT3/HIF1A/EGR1/CHEK1/BAG3/ARNT/HSPA5/EPAS1	15	BP
GO:0060251	regulation of glial cell proliferation	15/1159	39/18903	3.70418e-09	2.59e-08	9.19178e-09	TNF/IL6/IL1B/LTA/LYN/CHRM1/SHH/ABCC8/TP53/NOTCH1/HES1/KRAS/E2F1/PRKCH/SLC7A5	15	BP
GO:0001508	action potential	30/1159	146/18903	3.87168e-09	2.7e-08	9.59643e-09	TNF/TACR1/ATP2A2/MTOR/CAV1/SCN4A/CACNA1C/GJA1/GBA1/FLNA/CNR2/KCNQ1/CNR1/CHRNA1/P2RX1/SLC8A1/ATP1A1/CACNA2D1/CACNA1H/ADRA1A/KCNA1/DRD1/SLMAP/SCN1A/SCN2A/KCNJ5/GPER1/CALM1/KCNE1/SCN9A	30	BP
GO:0072594	establishment of protein localization to organelle	61/1159	449/18903	3.9859e-09	2.78e-08	9.86825e-09	TGFB1/PTGS2/SMAD3/NFKBIA/ANGPT1/CDH1/MAPK14/GZMB/HSP90AA1/JAK2/SHH/MAVS/RANBP6/TP53/RAC2/NOTCH1/DDIT3/BAX/MAPK8/HSPD1/CLU/AKT1/BECN1/HAX1/CRY2/AGT/GLP1R/PRKCD/FLNA/HDAC3/HSPA8/PITRM1/CDKN1A/BID/BAG3/TNPO1/KPNB1/LMAN1/CCT8/PIK3R1/HSPA1L/TRAF3IP2/RAN/HSPA5/HUWE1/DNAJA1/IPO7/LRRK2/ELAVL1/HK1/STK4/RNF31/SQSTM1/DRD1/CCT5/PEX2/MAPT/PRKAA1/SORT1/NMT1/CDK1	61	BP
GO:1905475	regulation of protein localization to membrane	33/1159	172/18903	4.08156e-09	2.84e-08	1.00885e-08	TNF/TGFB1/ITGB2/ITGAM/EGFR/ITGB1/GZMB/FYN/AR/ERBB2/MAPK8/LRP1/AKT1/PDPK1/MMP14/DAG1/ACTB/BCL2L1/PIK3R1/CD81/CLTC/SLC7A11/EPHA2/SQSTM1/KIF5B/PRKCH/PICALM/NMT1/GPER1/HRAS/KCNE1/RAP1A/CIB1	33	BP
GO:0071331	cellular response to hexose stimulus	29/1159	138/18903	4.08457e-09	2.84e-08	1.00885e-08	ICAM1/FOXO3/CASR/GPX1/ANO1/HIF1A/NR1D1/PRKAA2/NOX4/ADRA2A/IGF1R/RAF1/SMARCA4/OPRK1/NCF1/MEN1/SLC26A6/GCG/KAT5/PIK3CA/XBP1/PRKACA/SERPINF1/OSBP/PRKAA1/LIN28A/GPR68/PPARD/GPER1	29	BP
GO:0043627	response to estrogen	20/1159	70/18903	4.08883e-09	2.84e-08	1.00885e-08	IL4R/HMOX1/MMP2/MME/HSP90AA1/AR/ESR1/CYP27B1/CCND1/CAV1/EP300/CTNNA1/GBA1/MMP14/OPRK1/SFRP1/RARA/PDGFRB/BRCA1/SRD5A1	20	BP
GO:0002730	regulation of dendritic cell cytokine production	10/1159	16/18903	4.12235e-09	2.86e-08	1.01596e-08	TLR4/NOD2/TLR9/TLR3/CLEC7A/PLCG2/MAVS/JAK3/DDX1/KIT	10	BP
GO:0061756	leukocyte adhesion to vascular endothelial cell	18/1159	57/18903	4.14856e-09	2.88e-08	1.02126e-08	TNF/ALOX5/IL6/VCAM1/ITGB2/CX3CR1/SELE/SELL/CXCL12/ITGB1/RHOA/SELPLG/IRAK1/TRAF6/CCL21/RELA/MADCAM1/ROCK1	18	BP
GO:1903707	negative regulation of hemopoiesis	26/1159	114/18903	4.18782e-09	2.9e-08	1.02975e-08	IL4R/IL4/TLR4/IRF1/TLR3/HMGB1/LYN/TNFSF4/LTF/SHH/CTNNB1/JAK3/RUNX1/ERBB2/MYC/CEBPA/BCL6/CR1/IFNA2/SFRP1/RARA/PIK3R1/PRDX2/INPP5D/GPR68/CD74	26	BP
GO:0034121	regulation of toll-like receptor signaling pathway	21/1159	77/18903	4.25195e-09	2.94e-08	1.04434e-08	IRAK3/CD14/TLR2/NOD2/TLR9/IRF1/TLR1/TLR3/F2RL1/HMGB1/LYN/LTF/TLR5/ESR1/CAV1/NR1D1/BIRC3/PDPK1/BIRC2/FLOT1/NR1H3	21	BP
GO:0030890	positive regulation of B cell proliferation	16/1159	45/18903	4.28866e-09	2.96e-08	1.05141e-08	IL4/TLR4/TLR9/MIF/BTK/TNFRSF4/TNFSF13B/CD38/TFRC/BCL6/PTPRC/CDKN1A/BST1/CD81/BMI1/CD74	16	BP
GO:0061081	positive regulation of myeloid leukocyte cytokine production involved in immune response	14/1159	34/18903	4.29044e-09	2.96e-08	1.05141e-08	TLR4/NOD2/NOD1/MIF/TLR3/PLCG2/MAVS/SIRT1/RIPK2/DDX1/KIT/NR4A3/MAPKAPK2/CD74	14	BP
GO:0072330	monocarboxylic acid biosynthetic process	38/1159	218/18903	4.655e-09	3.21e-08	1.13946e-08	ALOX5/GSTM1/GSTP1/IL1B/PTGS2/ALOX15/PTGS1/MIF/CYP3A4/IDO1/CYP1A2/CYP1A1/AKR1C3/APOA1/PTGES/NR1D1/GPX4/PRKAA2/SIRT1/CYP2C9/NR1H2/CYP2C8/TBXAS1/ALDH1A2/PARK7/FADS1/ELOVL1/BRCA1/CBR1/PKLR/XBP1/CES1/OSBP/ACACA/PRKAA1/MGLL/NR1H3/CD74	38	BP
GO:0062207	regulation of pattern recognition receptor signaling pathway	25/1159	107/18903	4.89071e-09	3.37e-08	1.1958e-08	IRAK3/CD14/TLR4/TLR2/NOD2/TLR9/IRF1/TLR1/TLR3/F2RL1/HMGB1/LYN/LTF/TLR5/ESR1/CAV1/NR1D1/HSPA1A/BIRC3/XIAP/PDPK1/USP15/BIRC2/FLOT1/NR1H3	25	BP
GO:0035306	positive regulation of dephosphorylation	19/1159	64/18903	4.92383e-09	3.39e-08	1.20254e-08	TGFB1/SMAD3/ADORA1/SRC/JAK2/MTOR/BMP2/PIN1/PTPRC/GBA1/PRKCD/DLC1/PTBP1/PDGFRB/PPP1R15A/PPIA/ROCK1/ITGA1/CALM1	19	BP
GO:0046887	positive regulation of hormone secretion	27/1159	123/18903	5.14964e-09	3.54e-08	1.25628e-08	PPARG/TACR1/CREB1/CD38/BMP6/JAK2/SPP1/CASR/ANO1/HIF1A/FGG/AIMP1/TRPM2/RBP4/P2RY1/GCG/PFKM/DRD2/GALR1/OSBP/TCF7L2/GPR68/GABBR1/PPARD/GPER1/FFAR4/FFAR1	27	BP
GO:0002562	somatic diversification of immune receptors via germline recombination within a single locus	20/1159	71/18903	5.36706e-09	3.68e-08	1.30638e-08	IL4/TGFB1/HMGB1/TNFSF4/CCR6/LIG4/TFRC/HSPD1/BCL6/PTPRC/PRKDC/ATM/NBN/ERCC1/TP53BP1/LEF1/EXO1/TCF7/DCAF1/TNFSF13	20	BP
GO:0016444	somatic cell DNA recombination	20/1159	71/18903	5.36706e-09	3.68e-08	1.30638e-08	IL4/TGFB1/HMGB1/TNFSF4/CCR6/LIG4/TFRC/HSPD1/BCL6/PTPRC/PRKDC/ATM/NBN/ERCC1/TP53BP1/LEF1/EXO1/TCF7/DCAF1/TNFSF13	20	BP
GO:1902106	negative regulation of leukocyte differentiation	25/1159	108/18903	5.99804e-09	4.11e-08	1.45832e-08	IL4R/IL4/TLR4/IRF1/TLR3/HMGB1/LYN/TNFSF4/LTF/SHH/CTNNB1/JAK3/RUNX1/ERBB2/MYC/BCL6/CR1/IFNA2/SFRP1/RARA/PIK3R1/PRDX2/INPP5D/GPR68/CD74	25	BP
GO:0051480	regulation of cytosolic calcium ion concentration	17/1159	52/18903	6.16846e-09	4.22e-08	1.49808e-08	ADORA1/CALCA/CAV1/F2/ITPR1/GRM1/P2RX1/SLC8A1/P2RY1/GRM5/RYR1/TSPOAP1/PRKACA/TRPC4/GRIA1/GPER1/TRPC5	17	BP
GO:0070266	necroptotic process	16/1159	46/18903	6.20335e-09	4.24e-08	1.50486e-08	TNF/TLR3/CASP8/PARP1/FAS/TP53/CAV1/BIRC3/CFLAR/RIPK1/BIRC2/RNF31/PYGL/ITPK1/TRPM7/DNM1L	16	BP
GO:0060760	positive regulation of response to cytokine stimulus	19/1159	65/18903	6.56076e-09	4.48e-08	1.58979e-08	TLR4/TLR2/IL1R1/CSF1/CXCR4/CASP1/ADAM17/MAVS/IFIH1/HIF1A/HSPA1A/RIPK2/CASP4/IRGM/AGPAT1/RIPK1/TBK1/IKBKE/CD74	19	BP
GO:0050927	positive regulation of positive chemotaxis	12/1159	25/18903	6.58197e-09	4.48e-08	1.59136e-08	CXCL8/SMAD3/CCR4/F2RL1/CXCL12/VEGFA/CASR/KDR/F3/S1PR1/CDH13/PGF	12	BP
GO:0070423	nucleotide-binding oligomerization domain containing signaling pathway	12/1159	25/18903	6.58197e-09	4.48e-08	1.59136e-08	TLR4/NOD2/NFKBIA/HSPA1A/BIRC3/XIAP/RIPK2/RELA/MAP3K7/ITCH/IRGM/BIRC2	12	BP
GO:0090075	relaxation of muscle	14/1159	35/18903	6.74808e-09	4.58e-08	1.62621e-08	PDE4D/ADORA1/PDE4B/SOD1/PRKG1/ABCC8/SLC8A1/P2RY1/KCNMA1/ATP1A1/PDE5A/ATP2A1/PIK3CA/GRK2	14	BP
GO:0006970	response to osmotic stress	22/1159	86/18903	6.75614e-09	4.58e-08	1.62621e-08	TNF/PTGS2/NLRP3/TLR3/ABCB1/HSP90AA1/CASP3/CASP1/MTOR/TP53/BAX/ICOSLG/AKR1B1/PDPK1/SLC2A1/AQP1/OXSR1/SLC12A2/KCNMA1/PTK2B/FBP1/SCN2A	22	BP
GO:0007260	tyrosine phosphorylation of STAT protein	22/1159	86/18903	6.75614e-09	4.58e-08	1.62621e-08	TNF/IL12B/IL4/CCL5/IL6/IL18/CSF2/JAK1/IL6R/LYN/HDAC2/FYN/TNFRSF1A/JAK2/JAK3/CAV1/ERBB4/CSF1R/KIT/IFNA2/HES1/OSBP	22	BP
GO:0033077	T cell differentiation in thymus	22/1159	86/18903	6.75614e-09	4.58e-08	1.62621e-08	IL1B/IL1A/CCR6/CCR7/SOD1/SHH/LIG4/CTNNB1/ADAM17/TP53/ERBB2/RIPK2/PTPRC/GBA1/ABL1/PRKDC/VNN1/SOS1/RASGRP1/BMI1/ZEB1/CD74	22	BP
GO:0150115	cell-substrate junction organization	24/1159	101/18903	6.91667e-09	4.69e-08	1.66301e-08	SMAD3/ITGB3/RHOA/VEGFA/SRC/PTEN/ITGB4/ACVRL1/KDR/ABL1/RAC1/MMP14/DLC1/TEK/PLEC/THBS1/SFRP1/PTK2/PIP5K1A/PIK3R1/ROCK2/PTK2B/DUSP22/ROCK1	24	BP
GO:0010811	positive regulation of cell-substrate adhesion	27/1159	125/18903	7.45777e-09	5.05e-08	1.79112e-08	SMAD3/ALOX15/CSF1/ITGB3/CCR7/VEGFA/CX3CL1/JAK2/APOA1/KDR/CCL21/FGG/DOCK1/ABL1/FLNA/RAC1/TEK/CDH13/DAG1/GSK3B/SFRP1/STK4/CDC42/PTK2B/ILK/ROCK1/CIB1	27	BP
GO:0043535	regulation of blood vessel endothelial cell migration	30/1159	150/18903	7.52918e-09	5.09e-08	1.80627e-08	TNF/TGFB1/PTGS2/NOS3/HMOX1/NFE2L2/PPARG/HMGB1/ANGPT1/PRKCA/RHOA/VEGFA/FGFR1/ADAM17/ACVRL1/NOTCH1/HSPB1/HIF1A/KDR/SIRT1/AKT1/PDPK1/PIK3C2A/ABL1/CSNK2B/THBS1/FOXC2/EPHA2/PLCG1/CIB1	30	BP
GO:0090068	positive regulation of cell cycle process	42/1159	260/18903	7.63157e-09	5.15e-08	1.8288e-08	TNF/IL1B/IL1A/EGFR/CCN2/RHOA/ADAM17/PLCG2/CYP1A1/CCND1/CXCR5/TGFA/AKT1/HYAL1/BECN1/MDM2/PLCB1/IGF1R/ADAMTS1/BRD4/KIF23/INSR/APEX1/PDGFRB/CDK4/KAT5/FEN1/VPS4B/DRD2/SSTR5/ESPL1/ROCK2/AURKA/CDC42/CDC25B/DRD3/KIF20B/EREG/SPHK1/RXFP3/CHEK2/CDK1	42	BP
GO:0006959	humoral immune response	48/1159	320/18903	7.92074e-09	5.34e-08	1.896e-08	TNF/ALOX5/CXCL8/IL6/IL1B/LTA/CCL2/NOD2/MBL2/IL17F/CXCL10/C3/SLC11A1/LTF/CXCL1/CCR6/CCR7/CXCL5/CFH/PDCD1/TREM1/NOTCH1/TF/CLU/CFD/MS4A1/F2/IL36RN/CXCL13/PTPRC/CXCL2/CR1/PHB1/CXCL3/CXCL11/CXCL6/ANG/IFNA2/MASP1/BST1/PTPN6/CD81/TRAF3IP2/EXO1/IFNA6/ST6GAL1/C1S/BMI1	48	BP
GO:0035051	cardiocyte differentiation	31/1159	159/18903	8.04903e-09	5.42e-08	1.92459e-08	TGFB1/VCAM1/EDNRA/EGFR/ITGB1/MAPK3/VEGFA/MAPK1/MTOR/G6PD/NOTCH1/BMP2/NRG1/DKK1/AGT/ACVR1/NOX4/ZMPSTE24/PPARA/PLEC/SLC8A1/RARA/PDGFRB/JAG1/HES1/RARB/ADRA1A/CDC42/MAP2K4/GPER1/CDK1	31	BP
GO:0090092	regulation of transmembrane receptor protein serine/threonine kinase signaling pathway	45/1159	290/18903	8.06643e-09	5.43e-08	1.92662e-08	TGFB1/SMAD3/IL17F/SMAD2/PPARG/CREBBP/HDAC2/PARP1/HDAC1/TGFBR1/BMP6/JAK2/SHH/ADAM17/TP53/CAV1/ACVRL1/NOTCH1/EP300/BMP2/LRP1/KDR/HSPA1A/XIAP/SIRT1/PIN1/PDPK1/DKK1/ACVR1/ABL1/TET1/STUB1/CSNK2B/PPARA/THBS1/MEN1/SFRP1/BMPER/SMURF2/HES1/HSPA5/AXIN1/PRDM16/ILK/ZEB1	45	BP
GO:0015711	organic anion transport	53/1159	372/18903	8.23104e-09	5.53e-08	1.96377e-08	TNF/IL1B/NOS2/PTGS2/IL1A/ARG1/MIF/TRPV1/SLC11A1/ADORA1/ITGB1/ACE2/PLA2G2A/HRH3/ABCC1/CASR/PTGES/SLC6A12/GJA1/PSAP/NMUR2/AGT/CR1/GRM1/SLC2A1/SLC1A5/SLCO1B1/SLC12A2/SLC26A6/CYP4F2/MGST1/ABCG2/DRD2/SLC16A1/ASIC3/SLC7A11/SLC22A12/SLC46A1/CES1/SLC25A1/ATP8B1/TRPC4/PRKAA1/DRD3/SLC7A5/SLC44A4/SLCO1A2/SLC6A15/SLC27A1/GABBR1/SNCA/ABCC2/AKR1C1	53	BP
GO:0042417	dopamine metabolic process	15/1159	41/18903	8.31975e-09	5.58e-08	1.98057e-08	ITGB2/ITGAM/ALDH2/ATP7A/MAOB/PARK7/HPRT1/DRD2/DRD1/GRIN2A/DRD3/SNCA/MAOA/GPR37/NPR1	15	BP
GO:0051281	positive regulation of release of sequestered calcium ion into cytosol	15/1159	41/18903	8.31975e-09	5.58e-08	1.98057e-08	CXCL10/F2R/CX3CL1/BAX/GSTO1/BDKRB1/F2/PDPK1/ABL1/CXCL11/DRD1/GPER1/SNCA/PLCG1/CALM1	15	BP
GO:0001892	embryonic placenta development	22/1159	87/18903	8.52481e-09	5.7e-08	2.0229e-08	CSF2/CASP8/EGFR/CEBPB/MAPK1/ST14/HIF1A/NCOA1/AKT1/CEBPA/PKD1/MAP2K1/PRDM1/ARNT/LEF1/HES1/DNAJB6/STK4/SETD2/EPAS1/BPTF/GRB2	22	BP
GO:0014910	regulation of smooth muscle cell migration	22/1159	87/18903	8.52481e-09	5.7e-08	2.0229e-08	CCL5/TLR4/SERPINE1/NFE2L2/ITGB3/TACR1/RHOA/SRC/PRKG1/LRP1/CYP1B1/AGT/ATP7A/ADAMTS1/PDGFA/APEX1/PDGFRB/TPM1/RPS6KB1/NR4A3/S1PR2/PPARD	22	BP
GO:0019218	regulation of steroid metabolic process	24/1159	102/18903	8.52556e-09	5.7e-08	2.0229e-08	TNF/NR3C1/IL1A/NFKB1/SOD1/BMP6/RORA/CYP27B1/RORC/AKR1C3/APOA1/BMP2/NR1D1/SIRT1/EPHX2/KIT/IGF1R/EGR1/STUB1/ATP1A1/CES1/UGT1A1/PRKAA1/FGF1	24	BP
GO:0002639	positive regulation of immunoglobulin production	17/1159	53/18903	8.5656e-09	5.72e-08	2.02866e-08	IL4R/IL4/TGFB1/IL6/IL33/TLR9/CD86/TNFSF4/BTK/TNFRSF4/TFRC/PTPRC/PHB1/RBP4/TP53BP1/XBP1/TNFSF13	17	BP
GO:0045927	positive regulation of growth	42/1159	261/18903	8.56856e-09	5.72e-08	2.02866e-08	CSF1/EGFR/CREB1/CXCL12/MAPK14/CXCR4/RHOA/VEGFA/CD38/TGFBR1/MTOR/ADAM17/ERBB2/NOTCH1/ERBB4/RPS6KA3/AKT1/HYAL1/F2/RPS6KA1/PLCB1/MMP14/TRPV2/HBEGF/SFRP1/INSR/DRD2/SFN/RPS6KB1/CDC42/LIMK1/PTK2B/MAPT/TEAD1/SLC44A4/SPHK1/PIM1/YAP1/PPARD/CDK1/CIB1/TRPC5	42	BP
GO:0006109	regulation of carbohydrate metabolic process	34/1159	186/18903	8.68028e-09	5.78e-08	2.05236e-08	TGFB1/NR3C1/NFKB1/SRC/GPT/RORA/ENPP1/MTOR/RORC/TP53/EP300/HIF1A/PRKAA2/ADCYAP1R1/SIRT1/AKT1/CRY1/ZMPSTE24/PPARA/PPARGC1A/GSK3B/INSR/P2RY1/GCG/ARNT/CLTC/ADIPOR1/PTK2B/FBP1/PRKAA1/AP2A1/IRS1/GPER1/SNCA	34	BP
GO:0072577	endothelial cell apoptotic process	19/1159	66/18903	8.68762e-09	5.78e-08	2.05236e-08	TNF/IL4/ICAM1/CCL2/SERPINE1/NFE2L2/ANGPT1/FOXO3/AKR1C3/KDR/FGG/PDPK1/MAP3K5/ABL1/TEK/THBS1/CD248/GPER1/PLCG1	19	BP
GO:0010878	cholesterol storage	11/1159	21/18903	8.76223e-09	5.83e-08	2.06773e-08	PPARG/ABCA1/SOAT1/NR1H2/PPARA/EHD1/CES1/SCARB1/MSR1/NR1H3/PPARD	11	BP
GO:0140353	lipid export from cell	16/1159	47/18903	8.87228e-09	5.89e-08	2.09142e-08	IL1B/NOS2/PTGS2/IL1A/MIF/CRHR1/BMP6/SPP1/PTGES/AGTR1/CRY1/CRY2/AGT/KCNQ1/REN/GALR1	16	BP
GO:0043200	response to amino acid	26/1159	118/18903	9.07463e-09	6.02e-08	2.13679e-08	TNF/ARG1/NQO1/LYN/EGFR/MMP2/CCN2/RHOA/FYN/CASP3/CEBPB/MTOR/CYBB/COL1A1/COL1A2/SIX1/ATP7A/IGF1R/BCL2L1/DNMT1/CAPN2/PIK3CA/XBP1/RPS6KB1/SLC7A5/ZEB1	26	BP
GO:0046637	regulation of alpha-beta T cell differentiation	20/1159	73/18903	9.09959e-09	6.02e-08	2.13802e-08	IL12B/IL4R/IL4/IL18/NLRP3/CD86/IL12RB1/CD80/HMGB1/TNFSF4/RHOA/CCL19/SHH/JAK3/RUNX1/MALT1/RIPK2/BCL6/PRDM1/RARA	20	BP
GO:0050805	negative regulation of synaptic transmission	20/1159	73/18903	9.09959e-09	6.02e-08	2.13802e-08	IL1B/PTGS2/ADORA1/CD38/PTEN/CNR2/ACHE/ASIC1/DRD2/LRRK2/ARF1/DRD1/BCHE/PTK2B/MAPT/DRD3/S1PR2/GRIA1/GABBR1/RAP1A	20	BP
GO:0002371	dendritic cell cytokine production	10/1159	17/18903	9.4594e-09	6.23e-08	2.21058e-08	TLR4/NOD2/TLR9/TLR3/CLEC7A/PLCG2/MAVS/JAK3/DDX1/KIT	10	BP
GO:0090399	replicative senescence	10/1159	17/18903	9.4594e-09	6.23e-08	2.21058e-08	SERPINE1/MME/TP53/CDKN2A/ATM/CHEK1/CDKN1A/ERCC1/CHEK2/ATR	10	BP
GO:1900034	regulation of cellular response to heat	10/1159	17/18903	9.4594e-09	6.23e-08	2.21058e-08	CREBBP/MTOR/EP300/SIRT1/ATM/GSK3B/DNAJB6/MAPT/MAPKAPK2/ATR	10	BP
GO:1901550	regulation of endothelial cell development	10/1159	17/18903	9.4594e-09	6.23e-08	2.21058e-08	TNF/IL1B/VEGFA/TNFRSF1A/IKBKB/PLCB1/S1PR3/ROCK2/ROCK1/S1PR2	10	BP
GO:1903140	regulation of establishment of endothelial barrier	10/1159	17/18903	9.4594e-09	6.23e-08	2.21058e-08	TNF/IL1B/VEGFA/TNFRSF1A/IKBKB/PLCB1/S1PR3/ROCK2/ROCK1/S1PR2	10	BP
GO:0007044	cell-substrate junction assembly	23/1159	95/18903	9.68867e-09	6.37e-08	2.25928e-08	SMAD3/ITGB3/RHOA/VEGFA/SRC/PTEN/ITGB4/ACVRL1/KDR/ABL1/RAC1/MMP14/DLC1/TEK/PLEC/THBS1/SFRP1/PTK2/PIP5K1A/ROCK2/PTK2B/DUSP22/ROCK1	23	BP
GO:1990874	vascular associated smooth muscle cell proliferation	23/1159	95/18903	9.68867e-09	6.37e-08	2.25928e-08	TNF/HMOX1/JUN/PPARG/MMP2/RHOA/SRC/SOD2/PRKG1/JAK2/PTEN/DDIT3/MAP3K5/GJA1/AGT/ADAMTS1/CDKN1A/DNMT1/TPM1/NR4A3/HPGD/S1PR2/GPER1	23	BP
GO:0007369	gastrulation	35/1159	196/18903	9.87898e-09	6.48e-08	2.30118e-08	SMAD3/IL1RN/SMAD2/ITGB2/ITGB3/MMP2/DUSP1/ITGB1/MMP8/CTNNB1/ITGB4/TP53/APOA1/HMGA2/GJA1/DKK1/ACVR1/DVL1/MMP14/DUSP2/MAP2K1/DAG1/SFRP1/POU5F1/WNK1/LEF1/FOXC2/AXIN1/HNF4A/EPHA2/SETD2/PRKACA/DVL2/NR4A3/GRB2	35	BP
GO:0002011	morphogenesis of an epithelial sheet	18/1159	60/18903	1.03725e-08	6.79e-08	2.40836e-08	ITGB1/RHOA/MTOR/ADAM17/PTEN/ACVRL1/NOTCH1/CD44/FLNA/DVL1/DDR1/HBEGF/DAG1/LAMA1/SOS1/JAG1/DVL2/PDPN	18	BP
GO:0043407	negative regulation of MAP kinase activity	18/1159	60/18903	1.03725e-08	6.79e-08	2.40836e-08	IRAK3/GSTP1/IL1B/PPARG/LYN/DUSP1/NPPA/CAV1/BMP2/AGT/GBA1/DUSP10/PRKCD/HMGCR/SFRP1/PTPN6/DNAJA1/PTPN1	18	BP
GO:2000351	regulation of endothelial cell apoptotic process	18/1159	60/18903	1.03725e-08	6.79e-08	2.40836e-08	TNF/IL4/ICAM1/CCL2/SERPINE1/NFE2L2/ANGPT1/FOXO3/AKR1C3/KDR/FGG/PDPK1/ABL1/TEK/THBS1/CD248/GPER1/PLCG1	18	BP
GO:0045777	positive regulation of blood pressure	14/1159	36/18903	1.04207e-08	6.81e-08	2.41697e-08	PDE4D/TACR1/ADORA1/RHOA/HSD11B2/ADH5/ADRB1/AGT/GLP1R/CNR1/WNK1/TPM1/ADRA1A/AVPR2	14	BP
GO:0002312	B cell activation involved in immune response	22/1159	88/18903	1.07154e-08	6.99e-08	2.48001e-08	IL4/TGFB1/TLR4/IL6/TNFSF4/CCR6/LIG4/PLCG2/TFRC/HSPD1/LGALS1/BCL6/PTPRC/ABL1/CR1/NBN/ERCC1/TP53BP1/EXO1/XBP1/PTK2B/TNFSF13	22	BP
GO:0032370	positive regulation of lipid transport	22/1159	88/18903	1.07154e-08	6.99e-08	2.48001e-08	IL1B/IL1A/MIF/PPARG/NFKBIA/PON1/BMP6/PTCH1/SPP1/CAV1/APOA1/ABCA1/PTGES/LRP1/ANXA2/SIRT1/NR1H2/PRKCD/CYP4F2/GALR1/CES1/NR1H3	22	BP
GO:0031638	zymogen activation	19/1159	67/18903	1.14351e-08	7.44e-08	2.64093e-08	SERPINE1/CASP8/GGT1/THBD/RUNX1/ENO1/VSIR/ANXA2/RIPK2/FGG/MMP14/PGK1/THBS1/CASP9/KLK1/BAK1/DHCR24/GRIN2A/F12	19	BP
GO:0042531	positive regulation of tyrosine phosphorylation of STAT protein	19/1159	67/18903	1.14351e-08	7.44e-08	2.64093e-08	TNF/IL12B/IL4/CCL5/IL6/IL18/CSF2/IL6R/LYN/HDAC2/FYN/TNFRSF1A/JAK2/ERBB4/CSF1R/KIT/IFNA2/HES1/OSBP	19	BP
GO:0002200	somatic diversification of immune receptors	21/1159	81/18903	1.14614e-08	7.44e-08	2.64139e-08	IL4/TGFB1/HMGB1/TNFSF4/CCR6/LIG4/TFRC/HSPD1/BCL6/PTPRC/PRKDC/ATM/NBN/SAMHD1/ERCC1/TP53BP1/LEF1/EXO1/TCF7/DCAF1/TNFSF13	21	BP
GO:0014855	striated muscle cell proliferation	21/1159	81/18903	1.14614e-08	7.44e-08	2.64139e-08	ANGPT1/MAPK14/FOS/SRC/TGFBR1/JAK2/SHH/PTEN/RUNX1/NOTCH1/ERBB4/SIX1/ABL1/CFLAR/RBP4/FOXC2/EPHB1/PIM1/YAP1/PPARD/CDK1	21	BP
GO:0035872	nucleotide-binding domain, leucine rich repeat containing receptor signaling pathway	12/1159	26/18903	1.15414e-08	7.45e-08	2.64575e-08	TLR4/NOD2/NFKBIA/HSPA1A/BIRC3/XIAP/RIPK2/RELA/MAP3K7/ITCH/IRGM/BIRC2	12	BP
GO:0035994	response to muscle stretch	12/1159	26/18903	1.15414e-08	7.45e-08	2.64575e-08	JUN/NFKBIA/NFKB1/MAPK14/FOS/NPPA/CTNNB1/RELA/RAF1/PTK2/SLC8A1/PIK3CA	12	BP
GO:0050926	regulation of positive chemotaxis	12/1159	26/18903	1.15414e-08	7.45e-08	2.64575e-08	CXCL8/SMAD3/CCR4/F2RL1/CXCL12/VEGFA/CASR/KDR/F3/S1PR1/CDH13/PGF	12	BP
GO:0050951	sensory perception of temperature stimulus	12/1159	26/18903	1.15414e-08	7.45e-08	2.64575e-08	TRPA1/TRPV1/CXCL12/ADORA1/CXCR4/CALCA/ANO1/ADRA2A/OPRK1/NTRK1/ASIC3/EPHB1	12	BP
GO:0060333	interferon-gamma-mediated signaling pathway	12/1159	26/18903	1.15414e-08	7.45e-08	2.64575e-08	JAK1/IRF1/ARG1/PPARG/IFNGR2/STAT1/JAK2/TP53/NR1H2/IRGM/HCK/NR1H3	12	BP
GO:0035924	cellular response to vascular endothelial growth factor stimulus	20/1159	74/18903	1.17576e-08	7.58e-08	2.68962e-08	IL12B/VCAM1/XDH/MAPK14/FLT1/VEGFA/NOTCH1/GAS1/GAB1/HSPB1/KDR/AKT1/RELA/CD63/NR4A1/PDGFRB/PIK3CA/SPHK1/MAPKAPK2/PGF	20	BP
GO:0045123	cellular extravasation	20/1159	74/18903	1.17576e-08	7.58e-08	2.68962e-08	TNF/ICAM1/VCAM1/CCL2/IL1R1/ITGAL/CX3CR1/SELE/SELL/CCR2/CXCL12/ITGB1/SELPLG/CX3CL1/CCL21/PLCB1/BST1/MADCAM1/ROCK1/ITGA1	20	BP
GO:0002220	innate immune response activating cell surface receptor signaling pathway	13/1159	31/18903	1.18262e-08	7.61e-08	2.70245e-08	MBL2/CREBBP/LYN/FYN/CLEC7A/SRC/PLCG2/IKBKB/TRAF6/EP300/MAP3K7/KLRK1/PAK3	13	BP
GO:0002275	myeloid cell activation involved in immune response	23/1159	96/18903	1.20106e-08	7.72e-08	2.73882e-08	IL4R/IL4/IL33/HMOX1/ITGB2/CX3CR1/F2RL1/ITGAM/LYN/CCR2/BTK/PLCG2/RAC2/LAT/PDPK1/KIT/DNASE1/PTPN6/SCNN1B/RASGRP1/SPHK2/NR4A3/SUCNR1	23	BP
GO:0070664	negative regulation of leukocyte proliferation	23/1159	96/18903	1.20106e-08	7.72e-08	2.73882e-08	IL33/GSTP1/CD86/ARG1/CD80/LYN/IDO1/BTK/CASP3/CEBPB/SHH/PTEN/ERBB2/VSIR/CD274/BCL6/CR1/PDCD1LG2/ATM/ITCH/PTPN6/PDE5A/INPP5D	23	BP
GO:0010565	regulation of cellular ketone metabolic process	28/1159	136/18903	1.21491e-08	7.79e-08	2.76457e-08	IL1B/PTGS2/PPARG/BMP6/AKR1C3/CAV1/APOA1/BMP2/NR1D1/SIRT1/AKT1/NR1H2/EGR1/PPARA/CNR1/PPARGC1A/FABP1/PARK7/BRCA1/SLC7A11/CES1/BHMT/NR4A3/IRS1/NR1H3/PPARD/SNCA/CD74	28	BP
GO:0071333	cellular response to glucose stimulus	28/1159	136/18903	1.21491e-08	7.79e-08	2.76457e-08	ICAM1/FOXO3/CASR/GPX1/ANO1/HIF1A/NR1D1/PRKAA2/NOX4/ADRA2A/IGF1R/RAF1/SMARCA4/OPRK1/NCF1/MEN1/GCG/KAT5/PIK3CA/XBP1/PRKACA/SERPINF1/OSBP/PRKAA1/LIN28A/GPR68/PPARD/GPER1	28	BP
GO:2000403	positive regulation of lymphocyte migration	15/1159	42/18903	1.22109e-08	7.82e-08	2.77573e-08	CCL5/CXCL10/ITGB3/CCR2/CXCL12/RHOA/CCL20/ADAM17/CCL21/CXCL13/ABL1/OXSR1/WNK1/PTK2B/MADCAM1	15	BP
GO:0006953	acute-phase response	16/1159	48/18903	1.25546e-08	8.01e-08	2.84194e-08	TNF/IL6/IL1B/PTGS2/IL6R/MBL2/IL1A/TRPV1/SERPINA3/CEBPB/TFRC/PTGES/EDNRB/F2/CNR1/UGT1A1	16	BP
GO:0032620	interleukin-17 production	16/1159	48/18903	1.25546e-08	8.01e-08	2.84194e-08	IL12B/TGFB1/TLR4/IL6/IL18/NOD2/TNFSF4/BTK/JAK2/DDIT3/VSIR/PRKCQ/IL36RN/PHB1/SLC7A5/SPHK1	16	BP
GO:0032660	regulation of interleukin-17 production	16/1159	48/18903	1.25546e-08	8.01e-08	2.84194e-08	IL12B/TGFB1/TLR4/IL6/IL18/NOD2/TNFSF4/BTK/JAK2/DDIT3/VSIR/PRKCQ/IL36RN/PHB1/SLC7A5/SPHK1	16	BP
GO:0048538	thymus development	16/1159	48/18903	1.25546e-08	8.01e-08	2.84194e-08	MAPK3/TGFBR1/SOD1/MAPK1/SHH/CTNNB1/SIX1/ABL1/ZMPSTE24/RAF1/ATM/MAP2K1/PRDX2/HES1/BCL2L11/MAP2K2	16	BP
GO:0046661	male sex differentiation	32/1159	171/18903	1.31551e-08	8.38e-08	2.97475e-08	TLR9/IL1A/TLR3/AR/TGFBR1/BMP6/SHH/CTNNB1/ESR1/AKR1C3/CCND1/BAX/CYP1B1/CTNNA1/KIT/MMP14/REN/NTRK1/HSD17B4/SFRP1/INSR/SDC1/PDGFA/RARA/ERCC1/BCL2L1/PDGFRB/BCL2L11/DHCR24/NUDT1/SRD5A1/KCNE1	32	BP
GO:0035265	organ growth	33/1159	180/18903	1.32865e-08	8.46e-08	3.00134e-08	SMAD2/MAPK14/AR/TGFBR1/SOD1/SHH/ESR1/G6PD/PTEN/RUNX1/NOTCH1/ERBB4/AKT1/S1PR1/PSAP/AGT/ABL1/ZMPSTE24/PPARA/MMP13/RBP4/RARA/PDGFRB/BCL2L11/FOXC2/RARB/ADRA1A/STK4/MAP2K4/PIM1/YAP1/CDK1/DUSP6	33	BP
GO:0048678	response to axon injury	22/1159	89/18903	1.34186e-08	8.53e-08	3.02802e-08	ARG1/JUN/LYN/MMP2/SOD2/SOD1/JAK2/PLCG2/SPP1/PTEN/BAX/P2RY12/CTNNA1/IGF1R/FLNA/NTRK1/MAP2K1/DAG1/PCSK1/DRD2/MAP2K2/CDK1	22	BP
GO:0045216	cell-cell junction organization	36/1159	208/18903	1.43e-08	9.08e-08	3.22354e-08	TNF/TGFB1/IL1B/SMAD3/F2RL1/CDH1/PRKCA/ACE2/RHOA/F2R/VEGFA/SRC/TGFBR1/BMP6/CTNNB1/ABCC8/IKBKB/CAV1/PKP1/TJP1/GJA1/CSF1R/CTNNA1/AGT/FLNA/APC/PLEC/ACTB/GJB1/EPHA2/ROCK2/PRKACA/CDC42/PRKCH/ROCK1/GPBAR1	36	BP
GO:0072073	kidney epithelium development	29/1159	146/18903	1.56923e-08	9.96e-08	3.53372e-08	SMAD3/SMAD2/EDNRA/STAT1/CXCR2/VEGFA/PTCH1/SHH/CTNNB1/NOTCH1/BMP2/EDNRB/MYC/AGT/EPCAM/SIX1/PKD1/AQP1/SFRP1/BMPER/SDC1/RARA/JAG1/HES1/FOXC2/RARB/ILK/FGF1/YAP1	29	BP
GO:0002931	response to ischemia	17/1159	55/18903	1.60975e-08	1.02e-07	3.6137e-08	CSF1/CX3CR1/NQO1/CX3CL1/TP53/CAV1/CASR/MAP3K5/CSF1R/EGR1/STUB1/HYOU1/CASP9/SQSTM1/ROCK2/PTK2B/CIB1	17	BP
GO:1903202	negative regulation of oxidative stress-induced cell death	17/1159	55/18903	1.60975e-08	1.02e-07	3.6137e-08	NFE2L2/FYN/SOD2/CTNNB1/GPX1/HSPB1/HIF1A/SIRT1/AKT1/PARK7/LRRK2/SLC7A11/PYCR1/NR4A3/TRAP1/PPIA/GPR37	17	BP
GO:2000107	negative regulation of leukocyte apoptotic process	17/1159	55/18903	1.60975e-08	1.02e-07	3.6137e-08	CCL5/NOD2/MIF/CXCR2/CXCL12/IDO1/CCR7/CCL19/PDCD1/JAK3/HIF1A/CCL21/PRKCQ/BCL6/BCL2L1/ST6GAL1/CD74	17	BP
GO:0030728	ovulation	11/1159	22/18903	1.6552e-08	1.04e-07	3.7004e-08	IL4R/PTGS2/NOS3/MMP2/FOXO3/SIRT1/ADAMTS1/AFP/EREG/HPGD/PGR	11	BP
GO:0032928	regulation of superoxide anion generation	11/1159	22/18903	1.6552e-08	1.04e-07	3.7004e-08	TGFB1/GSTP1/ITGB2/F2RL1/ITGAM/CLEC7A/SOD1/FPR2/AGT/PRKCD/MAPT	11	BP
GO:0061042	vascular wound healing	11/1159	22/18903	1.6552e-08	1.04e-07	3.7004e-08	TNF/ALOX5/SERPINE1/CXCR4/VEGFA/KDR/SLC12A2/MCAM/FOXC2/XBP1/HPSE	11	BP
GO:0072111	cell proliferation involved in kidney development	11/1159	22/18903	1.6552e-08	1.04e-07	3.7004e-08	IL6R/ITGB3/STAT1/PTCH1/SHH/BMP2/MYC/CFLAR/EGR1/PDGFRB/LIN28A	11	BP
GO:0006633	fatty acid biosynthetic process	31/1159	164/18903	1.72964e-08	1.09e-07	3.86282e-08	ALOX5/GSTM1/GSTP1/IL1B/PTGS2/ALOX15/PTGS1/MIF/CYP3A4/CYP1A2/CYP1A1/AKR1C3/APOA1/PTGES/GPX4/PRKAA2/SIRT1/CYP2C9/NR1H2/CYP2C8/TBXAS1/FADS1/ELOVL1/BRCA1/CBR1/XBP1/ACACA/PRKAA1/MGLL/NR1H3/CD74	31	BP
GO:0045622	regulation of T-helper cell differentiation	15/1159	43/18903	1.76936e-08	1.11e-07	3.94748e-08	IL12B/IL4R/IL4/IL18/NLRP3/CD86/IL12RB1/CD80/TNFSF4/CCL19/JAK3/MALT1/RIPK2/BCL6/RARA	15	BP
GO:0050966	detection of mechanical stimulus involved in sensory perception of pain	9/1159	14/18903	1.79699e-08	1.13e-07	4.00499e-08	TNF/TRPA1/CXCL12/CXCR4/FYN/NTRK1/ASIC3/KCNA1/SCN1A	9	BP
GO:0008286	insulin receptor signaling pathway	26/1159	122/18903	1.89325e-08	1.19e-07	4.21519e-08	IL1B/SRC/ENPP1/GAB1/PRKCQ/SIRT1/AKT1/AGT/PIK3C2A/PRKCD/IGF1R/APC/GSK3B/INSR/PIK3R1/CDK4/FOXC2/PIK3CA/ADIPOR1/RPS6KB1/SHC1/PRKAA1/PIP4K2A/GRB2/PTPN1/IRS1	26	BP
GO:0045685	regulation of glial cell differentiation	20/1159	76/18903	1.93452e-08	1.21e-07	4.30266e-08	TGFB1/IL6/IL33/TLR2/HDAC2/CXCR4/HDAC1/SHH/CTNNB1/MTOR/NOTCH1/BMP2/NR1D1/F2/DUSP10/DAG1/HES1/DRD3/LIN28A/CDK1	20	BP
GO:0150116	regulation of cell-substrate junction organization	19/1159	69/18903	1.94738e-08	1.22e-07	4.32073e-08	SMAD3/RHOA/VEGFA/SRC/PTEN/ACVRL1/KDR/ABL1/RAC1/MMP14/DLC1/TEK/THBS1/SFRP1/PTK2/PIK3R1/ROCK2/DUSP22/ROCK1	19	BP
GO:2000401	regulation of lymphocyte migration	19/1159	69/18903	1.94738e-08	1.22e-07	4.32073e-08	CCL5/CCL2/CXCL10/ITGB3/CCR2/CXCL12/CCR6/RHOA/CCL20/ADAM17/CCL21/AKT1/CXCL13/ABL1/OXSR1/WNK1/PTK2B/KLRK1/MADCAM1	19	BP
GO:0006913	nucleocytoplasmic transport	48/1159	329/18903	1.95063e-08	1.22e-07	4.32073e-08	TGFB1/IL1B/PTGS2/SMAD3/NFKBIA/ANGPT1/CDH1/MAPK14/HSP90AA1/JAK2/SHH/MAVS/RANBP6/TP53/NOTCH1/RAPGEF3/MALT1/AKT1/CRY2/AGT/PRKCD/FLNA/PKD1/HDAC3/CDKN1A/GSK3B/BAG3/TNPO1/KPNB1/PARK7/PIK3R1/TRAF3IP2/RAN/XPO1/SFN/IPO7/AXIN1/LRRK2/ELAVL1/STK4/SQSTM1/SETD2/PRKACA/DRD1/ALYREF/TCF7L2/XPOT/CDK1	48	BP
GO:0051169	nuclear transport	48/1159	329/18903	1.95063e-08	1.22e-07	4.32073e-08	TGFB1/IL1B/PTGS2/SMAD3/NFKBIA/ANGPT1/CDH1/MAPK14/HSP90AA1/JAK2/SHH/MAVS/RANBP6/TP53/NOTCH1/RAPGEF3/MALT1/AKT1/CRY2/AGT/PRKCD/FLNA/PKD1/HDAC3/CDKN1A/GSK3B/BAG3/TNPO1/KPNB1/PARK7/PIK3R1/TRAF3IP2/RAN/XPO1/SFN/IPO7/AXIN1/LRRK2/ELAVL1/STK4/SQSTM1/SETD2/PRKACA/DRD1/ALYREF/TCF7L2/XPOT/CDK1	48	BP
GO:0010875	positive regulation of cholesterol efflux	12/1159	27/18903	1.96155e-08	1.22e-07	4.33606e-08	PPARG/NFKBIA/PON1/PTCH1/CAV1/APOA1/ABCA1/LRP1/SIRT1/NR1H2/CES1/NR1H3	12	BP
GO:0036296	response to increased oxygen levels	12/1159	27/18903	1.96155e-08	1.22e-07	4.33606e-08	HDAC2/MMP2/SOD2/FAS/CYP1A1/CAV1/COL1A1/ATG7/NOX1/PDGFRB/SLC7A5/PDPN	12	BP
GO:0045926	negative regulation of growth	40/1159	249/18903	2.0297e-08	1.26e-07	4.48212e-08	ADRB2/TGFB1/SMAD3/CDH1/PTCH1/ENPP1/CYP27B1/G6PD/SPP1/PTEN/TP53/ACVRL1/IFRD1/HIF1A/ENO1/HSPA1A/ADRB1/BDKRB1/SIRT1/CDKN2A/HYAL1/GJA1/BCL6/AGT/DUSP10/PHB1/PPARA/SMARCA4/CDKN1A/SFRP1/RBP4/ESR2/SPHK2/ADIPOR1/HNF4A/STK4/PPT1/FBP1/PPARD/NPR1	40	BP
GO:0042742	defense response to bacterium	53/1159	382/18903	2.0572e-08	1.28e-07	4.53822e-08	TNF/IL12B/TLR4/IL6/IL1B/TLR2/IL18/LTA/NOS2/NOD2/IL6R/TLR9/MBL2/IL17F/NOD1/SERPINE1/C5AR1/TLR3/F2RL1/SLC11A1/LTF/LCN2/TLR5/PLA2G2A/CEBPB/TNFRSF1A/CCL20/ADAM17/MAVS/TREM1/TF/FPR2/RIPK2/F2/NLRP1/CXCL13/PRKCD/CXCL6/DCD/AQP1/CASP4/ANG/GSDMD/IRGM/SCNN1B/SHC1/RNF31/EPHA2/TBK1/KLRK1/SHARPIN/OAS1/RNASE1	53	BP
GO:0198738	cell-cell signaling by wnt	60/1159	458/18903	2.09205e-08	1.3e-07	4.61043e-08	TGFB1/TLR2/SMAD3/EDNRA/NFKB1/EGFR/MAPK14/RHOA/HDAC1/OPRM1/SRC/SHH/CTNNB1/PLCG2/FOXO3/PTEN/CCND1/CAV1/NOTCH1/DDIT3/BMP2/LRP1/COL1A1/PRKAA2/EDNRB/XIAP/PIN1/TNKS/DKK1/NFATC1/ABL1/EGR1/DVL1/CSNK2B/APC/RAC1/PKD1/SMARCA4/GSK3B/SFRP1/BRD7/SDC1/RUVBL1/SMURF2/WNK1/LEF1/DRD2/CDH3/AXIN1/LRRK2/TCF7/STK4/CDC42/DVL2/PRKAA1/CRBN/TCF7L2/ILK/TPBG/YAP1	60	BP
GO:0043370	regulation of CD4-positive, alpha-beta T cell differentiation	17/1159	56/18903	2.18023e-08	1.35e-07	4.79987e-08	IL12B/IL4R/IL4/IL18/NLRP3/CD86/IL12RB1/CD80/HMGB1/TNFSF4/CCL19/JAK3/RUNX1/MALT1/RIPK2/BCL6/RARA	17	BP
GO:0002027	regulation of heart rate	24/1159	107/18903	2.32284e-08	1.44e-07	5.107e-08	TNF/EDNRA/PDE4D/TRPV1/ATP2A2/NPPA/CAV1/ADRB1/EDNRB/CACNA1C/AGT/MDM2/KCNQ1/SLC8A1/MYH7/CACNA2D1/DRD2/TPM1/ADRA1A/PRKACA/EPAS1/KCNJ5/CALM1/KCNE1	24	BP
GO:1904892	regulation of receptor signaling pathway via STAT	25/1159	115/18903	2.32445e-08	1.44e-07	5.107e-08	TNF/IL12B/IL4/TGFB1/CCL5/IL6/IL6R/PPARG/F2R/JAK2/JAK3/IL10RB/CAV1/NOTCH1/ERBB4/CYP1B1/F2/AGT/PTPRC/KIT/IFNA2/HES1/IFNA6/ADIPOR1/PTK2B	25	BP
GO:0002369	T cell cytokine production	14/1159	38/18903	2.36394e-08	1.46e-07	5.18099e-08	IL4/IL6/IL1B/IL18/IL1R1/NLRP3/ARG1/TNFSF4/CCR2/TRAF6/MALT1/MAP3K7/IFNA2/CD81	14	BP
GO:0002724	regulation of T cell cytokine production	14/1159	38/18903	2.36394e-08	1.46e-07	5.18099e-08	IL4/IL6/IL1B/IL18/IL1R1/NLRP3/ARG1/TNFSF4/CCR2/TRAF6/MALT1/MAP3K7/IFNA2/CD81	14	BP
GO:0007266	Rho protein signal transduction	28/1159	140/18903	2.36531e-08	1.46e-07	5.18099e-08	F2RL1/ITGB1/RHOA/F2R/APOA1/ABCA1/CFL1/AGTR1/ARRB1/BCL6/COL1A2/ABL1/ADRA2A/RAF1/RAC1/DLC1/CDH13/PDGFRB/ADRA1A/ROCK2/CDC42/LIMK1/FLOT1/ARHGEF1/CNKSR1/PDPN/ROCK1/ARHGDIA	28	BP
GO:0050994	regulation of lipid catabolic process	18/1159	63/18903	2.43498e-08	1.5e-07	5.32284e-08	TNF/IL1B/ADORA1/APOA1/ABHD5/AKT1/ADRA2A/PRKCD/PPARA/CNR1/FABP1/THRA/CDK4/SCARB1/PRKAA1/PNPLA2/HPGD/IRS1	18	BP
GO:0070542	response to fatty acid	18/1159	63/18903	2.43498e-08	1.5e-07	5.32284e-08	TLR2/PTGS2/PON1/CCN2/SRC/FOXO3/AKR1C3/PLCB1/PPP5C/TBXAS1/PCSK1/HES1/CDK4/PIK3CA/E2F1/IRS1/AKR1C1/FFAR1	18	BP
GO:1902041	regulation of extrinsic apoptotic signaling pathway via death domain receptors	16/1159	50/18903	2.43978e-08	1.5e-07	5.32795e-08	ICAM1/NOS3/SERPINE1/HMOX1/PTEN/GPX1/FGG/CFLAR/RAF1/THBS1/GSK3B/SFRP1/PARK7/BCL2L1/BRCA1/STK4	16	BP
GO:0009895	negative regulation of catabolic process	48/1159	332/18903	2.60944e-08	1.6e-07	5.69271e-08	TNF/IRAK3/IL1B/NOS2/SMAD3/HMOX1/NQO1/SLC11A1/EGFR/ADORA1/MAPK14/FYN/SHH/MTOR/TP53/NRG1/ANXA2/AKT1/PKP1/PIN1/BECN1/RELA/ADRA2A/PHB1/FLNA/PPARA/CNR1/HMGCR/PARK7/TRAF3IP2/PABPC1/PIK3CA/YBX1/LRRK2/ADRA1A/ELAVL1/E2F1/NPC1/GRIN2A/FBP1/PRKAA1/IKBKE/SLC7A5/TENT4A/ROCK1/MAPKAPK2/MCL1/SNCA	48	BP
GO:0043271	negative regulation of ion transport	31/1159	167/18903	2.69074e-08	1.65e-07	5.86417e-08	TNF/PTGS2/TLR9/NOS3/NOS1/CRHR1/ADORA1/HRH3/CAV1/GSTO1/FBXO11/ATP7A/ADRA2A/VDAC1/MAOB/OXSR1/CNR1/P2RY1/CYP4F2/WNK1/HES1/DRD2/PTK2B/PCSK9/CRBN/DRD3/GABBR1/SNCA/CALM1/KCNE1/ADRA2C	31	BP
GO:0001660	fever generation	8/1159	11/18903	2.72618e-08	1.67e-07	5.92354e-08	TNF/IL1B/PTGS2/IL1A/TRPV1/PTGES/EDNRB/CNR1	8	BP
GO:0002604	regulation of dendritic cell antigen processing and presentation	8/1159	11/18903	2.72618e-08	1.67e-07	5.92354e-08	NOD2/NOD1/SLC11A1/CCR7/CCL19/CCL21/THBS1/CD74	8	BP
GO:0071394	cellular response to testosterone stimulus	8/1159	11/18903	2.72618e-08	1.67e-07	5.92354e-08	AR/SPP1/SIRT1/IGF1R/NCF1/ROCK2/ELK1/SRD5A1	8	BP
GO:0008306	associative learning	21/1159	85/18903	2.88602e-08	1.77e-07	6.26455e-08	TACR1/ITGB1/FOS/ABCC8/HIF1A/RAPGEF3/AGT/KIT/ABL1/OPRK1/HMGCR/ASIC1/KMT2A/DRD2/SLC7A11/KRAS/PPT1/DRD1/GRIN2A/DRD3/TPBG	21	BP
GO:0045165	cell fate commitment	43/1159	282/18903	2.91732e-08	1.78e-07	6.32617e-08	IL12B/IL6/IL6R/SMAD2/EDNRA/IL12RB1/PPARG/HDAC2/ITGB1/RHOA/HDAC1/CASP3/AR/TGFBR1/PTCH1/SHH/CTNNB1/MTOR/TP53/NOTCH1/IFRD1/ERBB4/BMP2/GAS1/KDR/NRG1/DKK1/ACVR1/SIX1/PRKDC/APC/SFRP1/POU5F1/PRDM1/RARA/JAG1/HES1/FOXC2/CDC42/EPAS1/TCF7L2/PDPN/MCL1	43	BP
GO:0045907	positive regulation of vasoconstriction	13/1159	33/18903	2.92838e-08	1.78e-07	6.32944e-08	CYSLTR1/PTGS2/TACR1/RHOA/F2R/CD38/CAV1/CASR/FGG/ABL1/TBXAS1/ADRA1A/AVPR2	13	BP
GO:0070633	transepithelial transport	13/1159	33/18903	2.92838e-08	1.78e-07	6.32944e-08	CSF2/ABCB1/ABCC1/EDNRB/ITPR1/AQP1/SLC5A1/SLC12A2/ACTB/SLC26A6/SCNN1B/ABCG2/ABCC2	13	BP
GO:0006749	glutathione metabolic process	17/1159	57/18903	2.93052e-08	1.78e-07	6.32944e-08	GSTM1/GSTP1/NFE2L2/GSTT1/SOD2/SOD1/GGT1/GSTA1/G6PD/GPX1/GSTO1/GPX4/GSTK1/PARK7/SLC7A11/DPEP1/GSTT2B	17	BP
GO:1903053	regulation of extracellular matrix organization	17/1159	57/18903	2.93052e-08	1.78e-07	6.32944e-08	TGFB1/IL6/SMAD3/ITGB3/DPP4/TNFRSF1A/RUNX1/NOTCH1/BMP2/LRP1/AGT/ABL1/CFLAR/DDR1/DAG1/LAMA1/PDPN	17	BP
GO:1903844	regulation of cellular response to transforming growth factor beta stimulus	29/1159	150/18903	2.95154e-08	1.79e-07	6.3685e-08	IL4/TGFB1/SMAD3/IL17F/SMAD2/PPARG/CREBBP/HDAC2/HDAC1/ADAM17/TP53/CAV1/EP300/BMP2/HSPA1A/SIRT1/PIN1/PDPK1/TET1/CFLAR/STUB1/PPARA/THBS1/MEN1/SMURF2/HSPA5/AXIN1/PRDM16/ZEB1	29	BP
GO:0032727	positive regulation of interferon-alpha production	11/1159	23/18903	2.99649e-08	1.82e-07	6.45905e-08	TLR4/TLR9/TLR3/STAT1/CHUK/MAVS/IFIH1/HSPD1/RIPK2/SETD2/TBK1	11	BP
GO:0051099	positive regulation of binding	32/1159	177/18903	3.10549e-08	1.88e-07	6.68734e-08	TGFB1/PPARG/HMGB1/PON1/PARP1/MMP8/JAK2/CTNNB1/TRAF6/CAV1/EP300/BMP2/LRP1/ANXA2/RIPK2/PIN1/ABL1/PKD1/MEN1/GSK3B/PARK7/GCG/RARA/HES1/RAN/NME1/LRRK2/STK4/FLOT1/TCF7L2/MED25/CALM1	32	BP
GO:1904705	regulation of vascular associated smooth muscle cell proliferation	22/1159	93/18903	3.18511e-08	1.93e-07	6.852e-08	TNF/HMOX1/JUN/PPARG/MMP2/RHOA/SRC/SOD2/PRKG1/JAK2/PTEN/MAP3K5/GJA1/AGT/ADAMTS1/CDKN1A/DNMT1/TPM1/NR4A3/HPGD/S1PR2/GPER1	22	BP
GO:0051893	regulation of focal adhesion assembly	18/1159	64/18903	3.19513e-08	1.93e-07	6.85991e-08	SMAD3/RHOA/VEGFA/SRC/PTEN/ACVRL1/KDR/ABL1/RAC1/MMP14/DLC1/TEK/THBS1/SFRP1/PTK2/ROCK2/DUSP22/ROCK1	18	BP
GO:0090109	regulation of cell-substrate junction assembly	18/1159	64/18903	3.19513e-08	1.93e-07	6.85991e-08	SMAD3/RHOA/VEGFA/SRC/PTEN/ACVRL1/KDR/ABL1/RAC1/MMP14/DLC1/TEK/THBS1/SFRP1/PTK2/ROCK2/DUSP22/ROCK1	18	BP
GO:0010466	negative regulation of peptidase activity	41/1159	263/18903	3.24035e-08	1.96e-07	6.93832e-08	TNF/PTGS2/SERPINE1/C3/LTF/SERPINA3/VEGFA/SRC/GPX1/LRP1/RPS6KA3/BIRC3/CD44/XIAP/ANXA2/AKT1/AGT/RPS6KA1/CR1/FNIP1/PRDX5/RAF1/PEBP1/AQP1/NR4A1/THBS1/CTSB/FABP1/PARK7/SERPINB8/SERPINH1/SFN/DNAJB6/BIRC2/DHCR24/SERPINF1/PICALM/ROCK1/SNCA/DPEP1/SERPINA2	41	BP
GO:0010818	T cell chemotaxis	12/1159	28/18903	3.24125e-08	1.96e-07	6.93832e-08	CCL5/CCL26/CXCL10/CCR2/ADAM17/CCL21/CXCL13/CXCL11/OXSR1/PLEC/SLC12A2/WNK1	12	BP
GO:1904385	cellular response to angiotensin	12/1159	28/18903	3.24125e-08	1.96e-07	6.93832e-08	NFE2L2/NFKB1/SRC/CAV1/AGTR1/AGT/RELA/PRKCD/IGF1R/CA2/ROCK2/ROCK1	12	BP
GO:0070527	platelet aggregation	19/1159	71/18903	3.24541e-08	1.96e-07	6.94035e-08	IL6/ITGB3/LYN/PRKCA/PRKG1/JAK2/HSPB1/PRKCQ/P2RY12/FGG/PRKCD/FLNA/ACTB/PTPN6/SLC7A11/PDPN/ILK/PPIA/CSRP1	19	BP
GO:0006721	terpenoid metabolic process	23/1159	101/18903	3.35456e-08	2.02e-07	7.1667e-08	CYP3A4/CYP1A2/CYP1A1/AKR1C3/ADH5/LRP1/CYP1B1/CYP2C9/AKR1B1/CYP26A1/CYP2C8/ADH1C/RBP4/ALDH1A2/ADH1B/DGAT1/UGT1A1/PNPLA2/TTR/PPARD/SRD5A1/FDPS/AKR1C1	23	BP
GO:0032350	regulation of hormone metabolic process	14/1159	39/18903	3.48032e-08	2.09e-07	7.42805e-08	NR3C1/NFKB1/BMP6/CYP27B1/AKR1C3/BMP2/HIF1A/ZMPSTE24/IGF1R/EGR1/STUB1/ARNT/ATP1A1/TCF7L2	14	BP
GO:0048469	cell maturation	33/1159	187/18903	3.49604e-08	2.1e-07	7.45425e-08	EDNRA/C3/PPARG/CCR6/BTK/VEGFA/CLEC7A/CCL19/CX3CL1/CTNNB1/G6PD/FOXO3/HIF1A/KDR/EDNRB/CCL21/CEBPA/FGG/AKR1B1/GBA1/ANG/REN/SLC26A6/HES1/LRRK2/PRKACA/AURKA/EPAS1/PTK2B/CDC25B/EREG/PGR/KCNE1	33	BP
GO:0009268	response to pH	15/1159	45/18903	3.58508e-08	2.15e-07	7.6131e-08	TRPV1/SRC/ABCC8/SCNN1A/CTSS/HYAL1/GBA1/SCNN1G/NOX1/ASIC1/SCNN1B/ASIC3/SERPINF1/GPR68/KCNE1	15	BP
GO:0060964	regulation of miRNA-mediated gene silencing	15/1159	45/18903	3.58508e-08	2.15e-07	7.6131e-08	TNF/TGFB1/IL6/PPARG/EGFR/ESR1/TP53/ZMPSTE24/MAP2K1/POU5F1/RIPK1/ELAVL1/FXR1/LIN28A/MAP2K2	15	BP
GO:0062208	positive regulation of pattern recognition receptor signaling pathway	15/1159	45/18903	3.58508e-08	2.15e-07	7.6131e-08	CD14/TLR4/TLR2/TLR9/TLR1/TLR3/F2RL1/HMGB1/LTF/TLR5/CAV1/HSPA1A/USP15/FLOT1/NR1H3	15	BP
GO:2000516	positive regulation of CD4-positive, alpha-beta T cell activation	15/1159	45/18903	3.58508e-08	2.15e-07	7.6131e-08	IL12B/IL4R/IL18/NLRP3/CD86/IL12RB1/CD80/TNFSF4/CCL19/PRKCQ/MALT1/RIPK2/RARA/CD81/HLA-DRB3	15	BP
GO:0001837	epithelial to mesenchymal transition	31/1159	169/18903	3.58811e-08	2.15e-07	7.6131e-08	TGFB1/IL6/IL1B/SMAD3/SMAD2/EDNRA/HDAC2/TGFBR1/FGFR1/CTNNB1/MTOR/PTEN/NOTCH1/BMP2/HIF1A/COL1A1/HMGA2/ACVR1/FLNA/DAG1/GSK3B/SFRP1/PTK2/JAG1/LEF1/PEF1/ADIPOR1/ROCK2/TCF7L2/PDPN/ROCK1	31	BP
GO:0046165	alcohol biosynthetic process	28/1159	143/18903	3.8264e-08	2.29e-07	8.11076e-08	NFKB1/CYP3A4/SOD1/BMP6/CYP27B1/PLCG2/G6PD/APOA1/BMP2/EBP/PRKAA2/ADCYAP1R1/GBA1/HMGCR/PARK7/P2RY1/SPTLC1/CACNA1H/SPHK2/DHCR24/CES1/PTK2B/PRKAA1/SPHK1/FGF1/GPER1/SNCA/FDPS	28	BP
GO:0019369	arachidonic acid metabolic process	17/1159	58/18903	3.91039e-08	2.33e-07	8.2726e-08	ALOX5/PTGS2/ALOX15/PTGS1/EPHX1/CYP1A2/CYP1A1/AKR1C3/GPX1/GPX4/CYP1B1/CYP2C9/CYP2C8/TBXAS1/CYP4F2/CBR1/MGLL	17	BP
GO:0048010	vascular endothelial growth factor receptor signaling pathway	17/1159	58/18903	3.91039e-08	2.33e-07	8.2726e-08	IL1B/ITGB3/MAPK14/FLT1/VEGFA/FYN/SRC/HSPB1/HIF1A/KDR/PTK2/ARNT/FOXC2/PTK2B/MAPKAPK2/PTPN1/PGF	17	BP
GO:0010885	regulation of cholesterol storage	10/1159	19/18903	4.01171e-08	2.39e-07	8.4704e-08	PPARG/ABCA1/NR1H2/PPARA/EHD1/CES1/SCARB1/MSR1/NR1H3/PPARD	10	BP
GO:1902176	negative regulation of oxidative stress-induced intrinsic apoptotic signaling pathway	10/1159	19/18903	4.01171e-08	2.39e-07	8.4704e-08	NFE2L2/SOD2/GPX1/HSPB1/HIF1A/SIRT1/AKT1/PARK7/TRAP1/PPIA	10	BP
GO:0019439	aromatic compound catabolic process	62/1159	489/18903	4.15099e-08	2.47e-07	8.75298e-08	HNMT/IL6/HMOX1/EPHX1/PDE4D/SLC11A1/PON1/PRKCA/XDH/MAPK14/IDO1/PDE4B/ENPP1/CYP1A1/ABCC1/BAX/APOBEC3C/HSPA1A/EPHX2/AKT1/PKP1/YTHDF1/TET1/PRKCD/MAOB/ATM/NEIL1/NT5E/ANG/SLCO1B1/DNASE1/ENTPD1/SAMHD1/APEX1/HPRT1/PDE7A/TRAF3IP2/FEN1/HINT1/PABPC4/NUDT3/PDE5A/PAH/PABPC1/YBX1/ELAVL1/UPB1/ROCK2/E2F1/FXR1/UGT1A1/IKBKE/LIN28A/NUDT1/APOBEC3B/TENT4A/ENTPD2/ROCK1/MAPKAPK2/MAOA/ABCC2/IDO2	62	BP
GO:0042698	ovulation cycle	19/1159	72/18903	4.15767e-08	2.47e-07	8.75298e-08	NOS3/MMP2/CASP3/OPRM1/SRC/ESR1/FOXO3/CYP1B1/SIRT1/IGF1R/EGR1/ADAMTS1/OPRK1/TRPM2/HSPA5/SERPINF1/AFP/EREG/PGR	19	BP
GO:1900046	regulation of hemostasis	19/1159	72/18903	4.15767e-08	2.47e-07	8.75298e-08	NOS3/SERPINE1/NFE2L2/F2RL1/F2R/PRKG1/THBD/CAV1/ANXA2/F3/FGG/F2/PRKCD/THBS1/PDGFA/PRDX2/TPH1/F12/HPSE	19	BP
GO:0002468	dendritic cell antigen processing and presentation	9/1159	15/18903	4.24705e-08	2.51e-07	8.92382e-08	NOD2/NOD1/SLC11A1/CCR7/CCL19/CCL21/THBS1/HLA-DRB3/CD74	9	BP
GO:0045989	positive regulation of striated muscle contraction	9/1159	15/18903	4.24705e-08	2.51e-07	8.92382e-08	CCN2/ACE2/HSP90AA1/NPPA/GSTO1/KCNQ1/ATP1A1/ATP2A1/ADRA1A	9	BP
GO:0016055	Wnt signaling pathway	59/1159	456/18903	4.29926e-08	2.54e-07	9.02476e-08	TGFB1/TLR2/SMAD3/EDNRA/NFKB1/EGFR/MAPK14/RHOA/HDAC1/SRC/SHH/CTNNB1/PLCG2/FOXO3/PTEN/CCND1/CAV1/NOTCH1/DDIT3/BMP2/LRP1/COL1A1/PRKAA2/EDNRB/XIAP/PIN1/TNKS/DKK1/NFATC1/ABL1/EGR1/DVL1/CSNK2B/APC/RAC1/PKD1/SMARCA4/GSK3B/SFRP1/BRD7/SDC1/RUVBL1/SMURF2/WNK1/LEF1/DRD2/CDH3/AXIN1/LRRK2/TCF7/STK4/CDC42/DVL2/PRKAA1/CRBN/TCF7L2/ILK/TPBG/YAP1	59	BP
GO:0034405	response to fluid shear stress	13/1159	34/18903	4.47558e-08	2.64e-07	9.36765e-08	CSF2/PTGS2/NOS3/NFE2L2/MMP2/SRC/ABCA1/AKT1/PKD1/HDAC3/PLEC/PDGFRB/PTK2B	13	BP
GO:0090022	regulation of neutrophil chemotaxis	13/1159	34/18903	4.47558e-08	2.64e-07	9.36765e-08	CXCL8/NOD2/C5AR1/CXCR2/DPP4/CCR7/CCL19/RAC2/CCL21/RAC1/BST1/DNM1L/CD74	13	BP
GO:0090322	regulation of superoxide metabolic process	13/1159	34/18903	4.47558e-08	2.64e-07	9.36765e-08	TGFB1/GSTP1/ITGB2/NFE2L2/F2RL1/ITGAM/CLEC7A/SOD1/FPR2/AGT/PRKCD/BST1/MAPT	13	BP
GO:0016236	macroautophagy	46/1159	317/18903	4.53993e-08	2.67e-07	9.49318e-08	ADRB2/IL4/NOD2/NOD1/HMOX1/MAPK3/CASP3/SRC/ATP2A2/MTOR/TP53/HIF1A/MAPK8/KDR/PRKAA2/SIRT1/RIPK2/AKT1/BECN1/GBA1/IKBKG/MAP3K7/VDAC1/ATG7/ATG4B/BAG3/IRGM/SPTLC1/CAPN1/HDAC6/VPS4B/HUWE1/PIK3CA/LRRK2/ATP6V1B1/RNF31/SQSTM1/PRKACA/NPC1/TBK1/LGALS8/PIKFYVE/PIP4K2A/MAP1LC3B/MAP1LC3A/CALM1	46	BP
GO:0001906	cell killing	33/1159	189/18903	4.56132e-08	2.68e-07	9.5287e-08	IL12B/IL4/IL18/ICAM1/NOS2/ARG1/C3/IL12RB1/CX3CR1/F2RL1/ITGAM/LTF/GZMB/CLEC7A/CFH/CTSC/TREM1/MAPK8/F2/PTPRC/CXCL6/DCD/PRF1/DNASE1/PRDX1/PTPN6/SCNN1B/BCL2L1/HPRT1/RASGRP1/KIF5B/KLRK1/SLAMF7	33	BP
GO:0031398	positive regulation of protein ubiquitination	25/1159	119/18903	4.77755e-08	2.81e-07	9.9708e-08	NOD2/ANGPT1/TRAF6/PTEN/CAV1/BIRC3/XIAP/MALT1/RIPK2/PIN1/CRY1/STUB1/HDAC3/SKP2/PLK1/FZR1/PEF1/BRCA1/HSPA5/HUWE1/AXIN1/LRRK2/BIRC2/BMI1/SPHK1	25	BP
GO:0001676	long-chain fatty acid metabolic process	24/1159	111/18903	4.93431e-08	2.9e-07	1.0288e-07	ALOX5/GSTM1/GSTP1/PTGS2/ALOX15/PTGS1/EPHX1/CYP3A4/CYP1A2/CYP1A1/GSTA1/AKR1C3/GPX1/GPX4/CYP1B1/CYP2C9/CYP2C8/TBXAS1/FADS1/CYP4F2/ELOVL1/CBR1/MGLL/SLC27A1	24	BP
GO:0043255	regulation of carbohydrate biosynthetic process	23/1159	103/18903	4.95562e-08	2.91e-07	1.03126e-07	TGFB1/NR3C1/NFKB1/GPT/ENPP1/EP300/ADCYAP1R1/SIRT1/AKT1/CRY1/PPARA/PPARGC1A/GSK3B/INSR/P2RY1/GCG/CLTC/PTK2B/FBP1/AP2A1/IRS1/GPER1/SNCA	23	BP
GO:0070167	regulation of biomineral tissue development	23/1159	103/18903	4.95562e-08	2.91e-07	1.03126e-07	ADRB2/ALOX5/TGFB1/SMAD3/NOS3/LTF/VDR/CCR1/CEBPB/BMP6/ENPP1/CYP27B1/NOTCH1/BMP2/HIF1A/S1PR1/ACVR1/ZMPSTE24/RXRB/SLC8A1/ROCK2/PTK2B/ROCK1	23	BP
GO:0048246	macrophage chemotaxis	14/1159	40/18903	5.05324e-08	2.96e-07	1.04956e-07	CCL5/CCL2/MIF/C5AR1/CSF1/MMP2/MAPK3/MAPK1/EDNRB/CSF1R/THBS1/PTK2/PTK2B/CMKLR1	14	BP
GO:0071392	cellular response to estradiol stimulus	14/1159	40/18903	5.05324e-08	2.96e-07	1.04956e-07	EGFR/MMP2/ESR1/IGF1R/CFLAR/SFRP1/CCNA2/KAT5/BCL2L11/ESR2/UGT1A1/NCOA3/SRD5A1/GPER1	14	BP
GO:0002763	positive regulation of myeloid leukocyte differentiation	17/1159	59/18903	5.18155e-08	3.03e-07	1.07415e-07	TNF/IL12B/TGFB1/CSF1/CASP8/CREB1/PRKCA/CCR1/FOS/TRAF6/RUNX1/HAX1/LEF1/RIPK1/GPR68/CD74/KLF10	17	BP
GO:0042306	regulation of protein import into nucleus	17/1159	59/18903	5.18155e-08	3.03e-07	1.07415e-07	TGFB1/PTGS2/SMAD3/ANGPT1/CDH1/MAPK14/HSP90AA1/JAK2/SHH/MAVS/PRKCD/FLNA/HDAC3/BAG3/PIK3R1/RAN/CDK1	17	BP
GO:0034123	positive regulation of toll-like receptor signaling pathway	12/1159	29/18903	5.22092e-08	3.04e-07	1.07716e-07	CD14/TLR2/TLR9/TLR1/TLR3/F2RL1/HMGB1/LTF/TLR5/CAV1/FLOT1/NR1H3	12	BP
GO:0048265	response to pain	12/1159	29/18903	5.22092e-08	3.04e-07	1.07716e-07	TRPA1/TRPV1/TACR1/CALCA/MTOR/EDNRB/AKT1/NMUR2/NTRK1/THBS1/CAPN2/SCN9A	12	BP
GO:0072012	glomerulus vasculature development	12/1159	29/18903	5.22092e-08	3.04e-07	1.07716e-07	IL6R/EDNRA/ITGB3/ANGPT1/NOTCH1/CFLAR/EGR1/TEK/AQP1/PDGFRB/HES1/FOXC2	12	BP
GO:0090025	regulation of monocyte chemotaxis	12/1159	29/18903	5.22092e-08	3.04e-07	1.07716e-07	PLA2G7/CCL5/SERPINE1/CXCL10/CX3CR1/HMGB1/LYN/CCR2/CXCL12/DUSP1/CCR1/FPR2	12	BP
GO:0097254	renal tubular secretion	12/1159	29/18903	5.22092e-08	3.04e-07	1.07716e-07	TACR1/ADORA1/EDNRB/AGTR1/AGT/ABCG2/DRD2/AVPR2/SLC22A12/ATP6V1B1/DRD3/NPR1	12	BP
GO:0060078	regulation of postsynaptic membrane potential	28/1159	145/18903	5.22854e-08	3.04e-07	1.0777e-07	ADRB2/TRPV1/ADORA1/CHRM1/OPRM1/PTEN/ADRB1/AKT1/DVL1/GRM1/CHRNA1/GSK3B/P2RX1/GRM5/DRD2/LRRK2/KCNA1/GABRG2/P2RX6/PTK2B/GRIN2A/GABRB3/GRIK1/S1PR2/GRIA1/GABBR1/GABRA2/SNCA	28	BP
GO:0051937	catecholamine transport	19/1159	73/18903	5.30038e-08	3.08e-07	1.09147e-07	CXCL12/ADORA3/HRH3/AGT/ADRA2A/OPRK1/CNR1/ACTB/PARK7/P2RY1/DRD2/SLC22A1/DRD1/GRK2/DRD3/GABBR1/SNCA/ADRA2C/CHRM5	19	BP
GO:0016125	sterol metabolic process	29/1159	154/18903	5.41271e-08	3.14e-07	1.11355e-07	IL4/PON1/CYP3A4/CYP1A2/SOD1/G6PD/APOA1/EBP/ABCA1/PRKAA2/CYP1B1/EPHX2/CYP2C9/CEBPA/GBA1/SOAT1/CYP26A1/HMGCR/SULT2B1/CYP21A2/DHCR24/NPC1/CES1/PCSK9/SCARB1/PRKAA1/FGF1/PPARD/FDPS	29	BP
GO:0048863	stem cell differentiation	39/1159	248/18903	5.49618e-08	3.18e-07	1.12965e-07	EDNRA/NFE2L2/HDAC2/MAPK14/ITGB1/MAPK3/HDAC1/MAPK1/SHH/CTNNB1/ESR1/TP53/NOTCH1/ERBB4/HIF1A/NRG1/EDNRB/HMGA2/EPCAM/PTPRC/ACVR1/KIT/SIX1/ABL1/PRKDC/GSK3B/SFRP1/ITCH/ALDH1A2/JAG1/HES1/KAT5/KDM4C/PEF1/FOXC2/SETD2/CDC42/LIN28A/YAP1	39	BP
GO:0032091	negative regulation of protein binding	22/1159	96/18903	5.88267e-08	3.4e-07	1.20794e-07	ADRB2/MAPK3/ATP2A2/CAV1/BAX/MAPK8/AKT1/PIN1/DKK1/ATP2A3/PRKCD/STUB1/DVL1/PPARA/CDKN1A/GSK3B/ACTB/PARK7/LRRK2/AURKA/PCSK9/ROCK1	22	BP
GO:0046425	regulation of receptor signaling pathway via JAK-STAT	23/1159	104/18903	5.99822e-08	3.47e-07	1.2305e-07	TNF/IL12B/IL4/CCL5/IL6/IL6R/F2R/JAK2/JAK3/IL10RB/CAV1/NOTCH1/ERBB4/CYP1B1/F2/AGT/PTPRC/KIT/IFNA2/HES1/IFNA6/ADIPOR1/PTK2B	23	BP
GO:0045861	negative regulation of proteolysis	49/1159	352/18903	6.31775e-08	3.65e-07	1.29482e-07	TNF/PTGS2/SERPINE1/C3/LTF/SERPINA3/VEGFA/SRC/SHH/TP53/GPX1/GAS1/LRP1/RPS6KA3/BIRC3/CD44/XIAP/ANXA2/AKT1/F2/AGT/RPS6KA1/NR1H2/CR1/FNIP1/PRDX5/RAF1/PEBP1/AQP1/NR4A1/THBS1/CTSB/FABP1/PARK7/SERPINB8/HDAC6/SERPINH1/SFN/DNAJB6/LRRK2/BIRC2/DHCR24/SERPINF1/PICALM/ROCK1/NR1H3/SNCA/DPEP1/SERPINA2	49	BP
GO:0021915	neural tube development	30/1159	164/18903	6.33178e-08	3.65e-07	1.29647e-07	TGFB1/CASP3/PTCH1/SHH/ST14/TRAF6/NOTCH1/HIF1A/BRD2/ABL1/DVL1/PKD1/DLC1/SFRP1/ALDH1A2/RARA/HES1/KAT5/STK4/MTHFD1/EPHA2/SETD2/PRKACA/PRKACB/DVL2/OPA1/MTHFD1L/ITPK1/KIF20B/BMI1	30	BP
GO:0043276	anoikis	13/1159	35/18903	6.72149e-08	3.86e-07	1.36927e-07	ITGB1/SRC/MTOR/CAV1/NOTCH1/AKT1/IKBKG/MAP3K7/PTK2/PIK3CA/E2F1/MCL1/CHEK2	13	BP
GO:0045762	positive regulation of adenylate cyclase activity	13/1159	35/18903	6.72149e-08	3.86e-07	1.36927e-07	ADRB2/EDNRA/CRHR1/ADORA3/CALCA/ORAI1/ADRB1/CACNA1C/GLP1R/RAF1/AVPR2/DRD1/RXFP1	13	BP
GO:1901099	negative regulation of signal transduction in absence of ligand	13/1159	35/18903	6.72149e-08	3.86e-07	1.36927e-07	TNF/IL1B/CSF2/IL1A/CX3CL1/HSPA1A/COL2A1/AKT1/CTNNA1/BCL2L1/PRDX2/RIPK1/MCL1	13	BP
GO:2000406	positive regulation of T cell migration	13/1159	35/18903	6.72149e-08	3.86e-07	1.36927e-07	CCL5/CXCL10/ITGB3/CCR2/CXCL12/RHOA/CCL20/ADAM17/CCL21/CXCL13/ABL1/OXSR1/WNK1	13	BP
GO:2001240	negative regulation of extrinsic apoptotic signaling pathway in absence of ligand	13/1159	35/18903	6.72149e-08	3.86e-07	1.36927e-07	TNF/IL1B/CSF2/IL1A/CX3CL1/HSPA1A/COL2A1/AKT1/CTNNA1/BCL2L1/PRDX2/RIPK1/MCL1	13	BP
GO:2000573	positive regulation of DNA biosynthetic process	19/1159	74/18903	6.72525e-08	3.86e-07	1.36927e-07	TNF/MAPK3/HSP90AA1/SRC/MAPK1/CTNNB1/CYP1B1/PRKCQ/MYC/TNKS/NOX4/ATM/CCT8/PDGFRB/NEK2/CCT5/PTK2B/ATR/PAK3	19	BP
GO:0006720	isoprenoid metabolic process	25/1159	121/18903	6.75799e-08	3.87e-07	1.37335e-07	CYP3A4/CYP1A2/CYP1A1/AKR1C3/ADH5/LRP1/CYP1B1/CYP2C9/AKR1B1/CYP26A1/CYP2C8/ADH1C/HMGCR/RBP4/ALDH1A2/ADH1B/DGAT1/DPAGT1/UGT1A1/PNPLA2/TTR/PPARD/SRD5A1/FDPS/AKR1C1	25	BP
GO:0030301	cholesterol transport	25/1159	121/18903	6.75799e-08	3.87e-07	1.37335e-07	PPARG/NFKBIA/NFKB1/PON1/PTCH1/SHH/CAV1/APOA1/ABCA1/LRP1/CLU/ANXA2/SIRT1/SOAT1/NR1H2/VPS4B/NPC1/CES1/OSBP/PCSK9/SCARB1/PIP4K2A/MSR1/NR1H3/AKR1C1	25	BP
GO:0044843	cell cycle G1/S phase transition	42/1159	280/18903	6.77754e-08	3.88e-07	1.37604e-07	CCL2/EGFR/ITGB1/ADAM17/PLCG2/CYP1A1/PTEN/MUC1/CCND1/TP53/CDK2/MYC/AKT1/CDKN2A/HYAL1/ACVR1/MDM2/PLCB1/PRKDC/APC/PKD1/ATM/ADAMTS1/SKP2/SMARCA4/EIF4E/BRD4/CDKN1A/BID/MEN1/ACTB/SMARCD2/BRD7/PTPN6/APEX1/CCNA2/CDK4/RPS6KB1/E2F1/CHEK2/EIF4EBP1/CUL1	42	BP
GO:0051353	positive regulation of oxidoreductase activity	17/1159	60/18903	6.81999e-08	3.9e-07	1.38336e-07	TNF/IL1B/NOD2/NOD1/VDR/CYP27B1/HIF1A/AGTR1/AKT1/AGT/ATP7A/ABL1/PARK7/CDH3/PTK2B/SCARB1/SNCA	17	BP
GO:0000082	G1/S transition of mitotic cell cycle	39/1159	250/18903	6.85406e-08	3.91e-07	1.38897e-07	CCL2/EGFR/ITGB1/ADAM17/CYP1A1/PTEN/MUC1/CCND1/TP53/CDK2/MYC/AKT1/CDKN2A/HYAL1/ACVR1/MDM2/PLCB1/PRKDC/APC/PKD1/ATM/ADAMTS1/SKP2/SMARCA4/EIF4E/BRD4/CDKN1A/BID/ACTB/SMARCD2/BRD7/PTPN6/APEX1/CDK4/RPS6KB1/E2F1/CHEK2/EIF4EBP1/CUL1	39	BP
GO:0036230	granulocyte activation	15/1159	47/18903	6.9567e-08	3.96e-07	1.40451e-07	TNF/CXCL8/CCL5/IL18/ITGB2/F2RL1/ITGAM/CCR2/CXCR2/PLA2G2A/PRKCD/CXCL6/DNASE1/SCNN1B/TRAF3IP2	15	BP
GO:0070849	response to epidermal growth factor	15/1159	47/18903	6.9567e-08	3.96e-07	1.40451e-07	EGFR/MAPK3/FOS/MAPK1/ERBB2/ERBB4/COL1A1/AKT1/PDPK1/BECN1/CFLAR/MARS1/EEF1A1/DUSP22/PLCG1	15	BP
GO:1900368	regulation of post-transcriptional gene silencing by RNA	15/1159	47/18903	6.9567e-08	3.96e-07	1.40451e-07	TNF/TGFB1/IL6/PPARG/EGFR/ESR1/TP53/ZMPSTE24/MAP2K1/POU5F1/RIPK1/ELAVL1/FXR1/LIN28A/MAP2K2	15	BP
GO:1902622	regulation of neutrophil migration	15/1159	47/18903	6.9567e-08	3.96e-07	1.40451e-07	CXCL8/NOD2/IL1A/IL1R1/C5AR1/CXCR2/DPP4/CCR7/CCL19/RAC2/CCL21/RAC1/BST1/DNM1L/CD74	15	BP
GO:0048638	regulation of developmental growth	47/1159	332/18903	6.99927e-08	3.98e-07	1.41179e-07	ADRB2/CSF1/CREB1/CXCL12/CDH1/MAPK14/CXCR4/VEGFA/AR/TGFBR1/SOD1/PTCH1/G6PD/SPP1/PTEN/RUNX1/NOTCH1/IFRD1/ERBB4/ADRB1/AKT1/DUSP10/SIX1/ABL1/ZMPSTE24/PLCB1/PPARA/TRPV2/CDKN1A/GSK3B/RBP4/INSR/CDK4/BCL2L11/DRD2/FOXC2/PIK3CA/RPS6KB1/STK4/LIMK1/MAPT/PIM1/YAP1/PPARD/CDK1/DUSP6/TRPC5	47	BP
GO:0008584	male gonad development	28/1159	147/18903	7.09794e-08	4.03e-07	1.43036e-07	TLR9/IL1A/TLR3/AR/TGFBR1/ESR1/AKR1C3/CCND1/BAX/CYP1B1/CTNNA1/KIT/MMP14/REN/NTRK1/HSD17B4/SFRP1/INSR/SDC1/PDGFA/RARA/ERCC1/BCL2L1/PDGFRB/BCL2L11/NUDT1/SRD5A1/KCNE1	28	BP
GO:0071868	cellular response to monoamine stimulus	23/1159	105/18903	7.24063e-08	4.09e-07	1.4513e-07	CHRM3/HDAC2/CHRM1/MAPK3/PDE4B/HRH3/MAPK1/GNB1/HRH4/ABL1/FLNA/KCNQ1/GSK3B/DRD2/PKLR/LRRK2/PRKACA/DRD1/NR4A3/DRD3/SRD5A1/SNCA/CHRM5	23	BP
GO:0071870	cellular response to catecholamine stimulus	23/1159	105/18903	7.24063e-08	4.09e-07	1.4513e-07	CHRM3/HDAC2/CHRM1/MAPK3/PDE4B/HRH3/MAPK1/GNB1/HRH4/ABL1/FLNA/KCNQ1/GSK3B/DRD2/PKLR/LRRK2/PRKACA/DRD1/NR4A3/DRD3/SRD5A1/SNCA/CHRM5	23	BP
GO:0110149	regulation of biomineralization	23/1159	105/18903	7.24063e-08	4.09e-07	1.4513e-07	ADRB2/ALOX5/TGFB1/SMAD3/NOS3/LTF/VDR/CCR1/CEBPB/BMP6/ENPP1/CYP27B1/NOTCH1/BMP2/HIF1A/S1PR1/ACVR1/ZMPSTE24/RXRB/SLC8A1/ROCK2/PTK2B/ROCK1	23	BP
GO:0032733	positive regulation of interleukin-10 production	14/1159	41/18903	7.24204e-08	4.09e-07	1.4513e-07	IL12B/IL4/TLR4/IL6/TLR2/NOD2/TLR9/F2RL1/HMGB1/TNFSF4/CLEC7A/PLCG2/HSPD1/CD274	14	BP
GO:0042119	neutrophil activation	14/1159	41/18903	7.24204e-08	4.09e-07	1.4513e-07	TNF/CXCL8/CCL5/IL18/ITGB2/F2RL1/ITGAM/CXCR2/PLA2G2A/PRKCD/CXCL6/DNASE1/SCNN1B/TRAF3IP2	14	BP
GO:0045454	cell redox homeostasis	14/1159	41/18903	7.24204e-08	4.09e-07	1.4513e-07	NOS2/NOS3/NOS1/NFE2L2/NQO1/SLC11A1/GPX1/DDIT3/PRDX6/PRDX5/PRDX1/APEX1/PRDX2/EGLN2	14	BP
GO:0016570	histone modification	60/1159	474/18903	7.28669e-08	4.11e-07	1.4589e-07	NOS1/CREBBP/HDAC2/VEGFA/HDAC1/CTNNB1/MUC1/TP53/EP300/MAPK8/NCOA1/SIRT1/NSD1/ARRB1/BCL6/ZMPSTE24/TET1/MAP3K7/EHMT1/PHB1/PRMT1/RIOX2/CHEK1/HDAC3/HAT1/SMYD3/USP15/BRD4/PPARGC1A/MEN1/ACTB/BRD7/PARK7/GCG/PRDM1/KMT2A/RUVBL1/SETDB1/HDAC6/LEF1/DNMT1/KAT5/KDM4C/BRCA1/HUWE1/SPHK2/LRRK2/OTUB1/SETD2/HDAC8/SETD7/RAD51/MECOM/NCOA3/PRDM16/EZH1/BMI1/SUV39H1/UHRF1/SNCA	60	BP
GO:0032412	regulation of ion transmembrane transporter activity	42/1159	281/18903	7.50738e-08	4.23e-07	1.50169e-07	ADRB2/CCL2/TLR9/NOS1/EDNRA/PDE4D/CHRM3/IFNGR2/CRHR1/CCR2/ABCB1/ITGB1/OPRM1/PDE4B/NPPA/PLCG2/ABCC8/CAV1/GSTO1/CTSS/ATP7A/ADRA2A/KCNQ1/OXSR1/GRM5/CAPN1/WNK1/KCNK3/CACNA2D1/RIPK1/DRD2/ATP2A1/SPHK2/KCNA1/PRKACA/PTK2B/PCSK9/CRBN/DRD3/SLMAP/CALM1/KCNE1	42	BP
GO:1903800	positive regulation of miRNA maturation	8/1159	12/18903	7.7366e-08	4.36e-07	1.54612e-07	TGFB1/IL6/EGFR/TP53/MAP2K1/RIPK1/LIN28A/MAP2K2	8	BP
GO:0042509	regulation of tyrosine phosphorylation of STAT protein	20/1159	82/18903	7.7451e-08	4.36e-07	1.54639e-07	TNF/IL12B/IL4/CCL5/IL6/IL18/CSF2/IL6R/LYN/HDAC2/FYN/TNFRSF1A/JAK2/CAV1/ERBB4/CSF1R/KIT/IFNA2/HES1/OSBP	20	BP
GO:0032956	regulation of actin cytoskeleton organization	50/1159	365/18903	7.77243e-08	4.37e-07	1.55042e-07	CCL24/SMAD3/CCL26/IL1A/ALOX15/F2RL1/ITGB3/TACR1/CXCL12/CCR7/CCN2/RHOA/TGFBR1/CX3CL1/MTOR/RAC2/APOA1/LRP1/RAPGEF3/CCL21/TJP1/S1PR1/HAX1/CSF1R/ABL1/PRKCD/FLNA/RAC1/DLC1/TEK/TRPM2/BST1/SFRP1/PDGFA/PDGFRB/PIK3R1/TPM1/PIK3CA/HCK/ROCK2/CDC42/LIMK1/ARF1/PTK2B/ROCK1/GRB2/HRAS/PAK3/ARHGDIA/TAOK1	50	BP
GO:0050852	T cell receptor signaling pathway	27/1159	139/18903	7.93283e-08	4.45e-07	1.58096e-07	PDE4D/CCR7/LCK/FYN/PDE4B/MAPK1/PLCG2/IKBKB/TRAF6/ICOSLG/MALT1/RIPK2/PTPRC/RELA/ABL1/IKBKG/MAP3K7/PTPN6/WNK1/CD81/PIK3CA/RNF31/INPP5D/DUSP22/HLA-DRB3/HRAS/PLCG1	27	BP
GO:0043500	muscle adaptation	25/1159	122/18903	8.01179e-08	4.49e-07	1.59523e-07	IL1B/SMAD3/NOS3/HMOX1/PPARG/PRKCA/PARP1/ATP2A2/TNFRSF1A/NPPA/G6PD/FOXO3/NOTCH1/BECN1/AGT/CFLAR/PPARA/DAG1/MYH7/PDE5A/ADRA1A/RPS6KB1/ROCK2/NR4A3/ROCK1	25	BP
GO:0007202	activation of phospholipase C activity	12/1159	30/18903	8.21655e-08	4.61e-07	1.63449e-07	CD86/EDNRA/C5AR1/SELE/EGFR/ADCYAP1R1/P2RY12/AGT/NMUR1/PHB1/ANG/ADRA1A	12	BP
GO:0046546	development of primary male sexual characteristics	28/1159	148/18903	8.25032e-08	4.62e-07	1.63971e-07	TLR9/IL1A/TLR3/AR/TGFBR1/ESR1/AKR1C3/CCND1/BAX/CYP1B1/CTNNA1/KIT/MMP14/REN/NTRK1/HSD17B4/SFRP1/INSR/SDC1/PDGFA/RARA/ERCC1/BCL2L1/PDGFRB/BCL2L11/NUDT1/SRD5A1/KCNE1	28	BP
GO:0016101	diterpenoid metabolic process	21/1159	90/18903	8.40925e-08	4.7e-07	1.66976e-07	CYP3A4/CYP1A2/CYP1A1/AKR1C3/ADH5/LRP1/CYP1B1/AKR1B1/CYP26A1/CYP2C8/ADH1C/RBP4/ALDH1A2/ADH1B/DGAT1/UGT1A1/PNPLA2/TTR/PPARD/SRD5A1/AKR1C1	21	BP
GO:0043266	regulation of potassium ion transport	24/1159	114/18903	8.45977e-08	4.73e-07	1.67825e-07	NOS3/NOS1/ADORA1/ITGB1/NPPA/ABCC8/CAV1/KCNMB1/ADRA2A/FLNA/CD63/KCNQ1/OPRK1/OXSR1/WNK1/KCNK3/DRD2/KCNA1/KIF5B/DRD1/PTK2B/CRBN/DRD3/KCNE1	24	BP
GO:0032890	regulation of organic acid transport	19/1159	75/18903	8.49411e-08	4.74e-07	1.68352e-07	TNF/IL1B/IL1A/ARG1/MIF/ADORA1/ITGB1/ACE2/HRH3/PTGES/AKT1/AGT/PPARA/THBS1/SLC12A2/CYP4F2/SLC7A5/GABBR1/SNCA	19	BP
GO:0010951	negative regulation of endopeptidase activity	39/1159	252/18903	8.52235e-08	4.76e-07	1.68758e-07	TNF/PTGS2/SERPINE1/C3/LTF/SERPINA3/VEGFA/SRC/GPX1/RPS6KA3/BIRC3/CD44/XIAP/ANXA2/AKT1/AGT/RPS6KA1/CR1/FNIP1/PRDX5/RAF1/PEBP1/AQP1/NR4A1/THBS1/FABP1/PARK7/SERPINB8/SERPINH1/SFN/DNAJB6/BIRC2/DHCR24/SERPINF1/PICALM/ROCK1/SNCA/DPEP1/SERPINA2	39	BP
GO:0015837	amine transport	23/1159	106/18903	8.71736e-08	4.86e-07	1.72359e-07	TNF/ARG1/CXCL12/ADORA1/ITGB1/ACE2/ADORA3/HRH3/AGT/ADRA2A/OPRK1/CNR1/SLC12A2/P2RY1/DRD2/DRD1/GRK2/DRD3/SLC7A5/SLC18A1/GABBR1/SNCA/ADRA2C	23	BP
GO:0051952	regulation of amine transport	22/1159	98/18903	8.72012e-08	4.86e-07	1.72359e-07	TNF/ARG1/CXCL12/ADORA1/ITGB1/ACE2/ADORA3/HRH3/AGT/ADRA2A/OPRK1/CNR1/SLC12A2/P2RY1/DRD2/DRD1/GRK2/DRD3/SLC7A5/GABBR1/SNCA/ADRA2C	22	BP
GO:0003071	renal system process involved in regulation of systemic arterial blood pressure	11/1159	25/18903	8.81365e-08	4.9e-07	1.7389e-07	F2RL1/ADORA1/RHOA/F2R/HSD11B2/EDNRB/AGTR1/AGT/REN/CYP4F2/SUCNR1	11	BP
GO:0003081	regulation of systemic arterial blood pressure by renin-angiotensin	11/1159	25/18903	8.81365e-08	4.9e-07	1.7389e-07	F2RL1/TACR1/ACE2/RHOA/F2R/EDNRB/AGTR1/AGT/REN/NOX1/SUCNR1	11	BP
GO:0046456	icosanoid biosynthetic process	17/1159	61/18903	8.91883e-08	4.95e-07	1.75645e-07	ALOX5/IL1B/PTGS2/LTA4H/PTGS1/MIF/CASP1/GGT1/AKR1C3/PTGES/SIRT1/CYP2C9/CYP2C8/TBXAS1/FADS1/CBR1/CD74	17	BP
GO:0060135	maternal process involved in female pregnancy	17/1159	61/18903	8.91883e-08	4.95e-07	1.75645e-07	PTGS2/ARG1/PARP1/ACE2/VDR/AR/ESR1/CYP27B1/SPP1/AKT1/CBS/CNR1/CTSB/MEN1/PRDM1/PPARD/PGR	17	BP
GO:0042446	hormone biosynthetic process	18/1159	68/18903	8.94028e-08	4.96e-07	1.75908e-07	NR3C1/NFKB1/BMP6/CYP27B1/BMP2/HIF1A/AKR1B1/IGF1R/EGR1/DUOX1/HSD3B1/CYP21A2/ARNT/ATP1A1/CYP17A1/CACNA1H/HSD17B1/SRD5A1	18	BP
GO:0002040	sprouting angiogenesis	32/1159	185/18903	9.11321e-08	5.05e-07	1.79148e-07	ALOX5/IL12B/PTGS2/JAK1/HMOX1/ANGPT1/ITGB1/RHOA/VEGFA/ACVRL1/NOTCH1/KDR/PKM/AGTR1/AKT1/TJP1/PDPK1/PIK3C2A/ABL1/TEK/NR4A1/CDH13/ESM1/THBS1/BMPER/LEF1/FOXC2/EPHA2/PTK2B/FGF1/PGF/CIB1	32	BP
GO:0050965	detection of temperature stimulus involved in sensory perception of pain	9/1159	16/18903	9.17753e-08	5.08e-07	1.80249e-07	TRPV1/CXCL12/ADORA1/CXCR4/CALCA/ANO1/NTRK1/ASIC3/EPHB1	9	BP
GO:0030282	bone mineralization	25/1159	123/18903	9.47839e-08	5.24e-07	1.85989e-07	ADRB2/ALOX5/TGFB1/PTGS2/SMAD3/ALOX15/LTF/VDR/CCR1/BMP6/ENPP1/CYP27B1/BMP2/HIF1A/PTHLH/S1PR1/COL1A2/ACVR1/ZMPSTE24/ALPL/MMP13/RXRB/SLC8A1/PTK2B/KLF10	25	BP
GO:0001974	blood vessel remodeling	15/1159	48/18903	9.54817e-08	5.27e-07	1.8702e-07	TGFB1/NOS3/EDNRA/CCR2/ACVRL1/BAX/CBS/AGT/ATP7A/MDM2/FLNA/JAG1/FOXC2/BAK1/EPAS1	15	BP
GO:0060147	regulation of post-transcriptional gene silencing	15/1159	48/18903	9.54817e-08	5.27e-07	1.8702e-07	TNF/TGFB1/IL6/PPARG/EGFR/ESR1/TP53/ZMPSTE24/MAP2K1/POU5F1/RIPK1/ELAVL1/FXR1/LIN28A/MAP2K2	15	BP
GO:0030307	positive regulation of cell growth	30/1159	167/18903	9.63634e-08	5.31e-07	1.88576e-07	EGFR/CXCL12/CXCR4/RHOA/VEGFA/CD38/TGFBR1/MTOR/ADAM17/ERBB2/RPS6KA3/AKT1/HYAL1/F2/RPS6KA1/MMP14/TRPV2/HBEGF/SFRP1/SFN/CDC42/LIMK1/PTK2B/MAPT/TEAD1/SLC44A4/SPHK1/YAP1/CIB1/TRPC5	30	BP
GO:0061564	axon development	61/1159	490/18903	1.03479e-07	5.7e-07	2.02318e-07	EDNRA/JUN/CREB1/MMP2/CXCL12/CDH1/ITGB1/VEGFA/HSP90AA1/FYN/CASP3/PTCH1/JAK2/SHH/SPP1/PTEN/RAC2/ERBB2/NOTCH1/IFRD1/PRKCQ/DCLK1/YTHDF1/CSF1R/CTNNA1/ABL1/IGF1R/FLNA/DVL1/RAC1/ECE1/TRPV2/DDR1/CCK/NTRK1/CNR1/MAP2K1/DAG1/LAMA1/GSK3B/ACTB/PTK2/SOS1/HDAC6/KIF5A/DRD2/EPHA2/LIMK1/KIF5B/FLOT1/ADCY1/MAPT/EPHB1/PICALM/TOP2B/ETV1/CCKAR/RPS6KA5/MAP2K2/PAK3/TRPC5	61	BP
GO:0002260	lymphocyte homeostasis	18/1159	69/18903	1.14084e-07	6.28e-07	2.2285e-07	MIF/LYN/TNFSF13B/CASP3/FAS/JAK3/BAX/HIF1A/LAT/AKT1/ABL1/SOS1/PRDX2/TRAF3IP2/BCL2L11/SLC40A1/BAK1/CD74	18	BP
GO:0043506	regulation of JUN kinase activity	17/1159	62/18903	1.15915e-07	6.36e-07	2.25816e-07	TNF/GSTP1/TLR9/CCL19/NPPA/TRAF6/CBS/MAP3K5/DKK1/DUSP10/MAP3K7/SFRP1/DNAJA1/AXIN1/DVL2/PTK2B/PTPN1	17	BP
GO:0070228	regulation of lymphocyte apoptotic process	17/1159	62/18903	1.15915e-07	6.36e-07	2.25816e-07	CCL5/MIF/LYN/IDO1/BTK/PDCD1/JAK3/PTEN/TP53/BAX/HIF1A/PRKCQ/CD274/BCL6/FNIP1/BCL2L11/CD74	17	BP
GO:1904036	negative regulation of epithelial cell apoptotic process	17/1159	62/18903	1.15915e-07	6.36e-07	2.25816e-07	IL4/ICAM1/SERPINE1/HMOX1/NFE2L2/ANGPT1/KDR/FGG/PDPK1/ABL1/IGF1R/CFLAR/PPARA/TEK/PRKAA1/TCF7L2/YAP1	17	BP
GO:2000241	regulation of reproductive process	34/1159	206/18903	1.18498e-07	6.5e-07	2.30642e-07	IL1A/ITGB3/HDAC2/TACR1/CCR6/DUSP1/VEGFA/AR/SRC/SOD1/SHH/CTNNB1/ESR1/NOTCH1/BAX/EDNRB/GJA1/KIT/PLCB1/CNR1/SFRP1/INSR/P2RY1/BCL2L1/JAG1/SMURF2/FZR1/PDE5A/CACNA1H/STK4/AURKA/SERPINF1/CDC25B/CIB1	34	BP
GO:0018205	peptidyl-lysine modification	54/1159	414/18903	1.23157e-07	6.75e-07	2.39495e-07	NOS1/CREBBP/HDAC2/CTNNB1/IFIH1/MUC1/EP300/PRKAA2/NCOA1/LOXL1/SIRT1/NSD1/ARRB1/RELA/ATP7A/ZMPSTE24/MDM2/MAP3K7/EHMT1/EGR1/CHEK1/CTH/HAT1/SMYD3/BRD4/PPARGC1A/MEN1/ACTB/BRD7/PLOD1/PARK7/GCG/KMT2A/RUVBL1/SENP1/SETDB1/ARNT/HDAC6/LEF1/DNMT1/KAT5/HINT1/KDM4C/BRCA1/SPHK2/SETD2/SETD7/NCOA3/PRKAA1/EZH1/SENP7/BMI1/SUV39H1/SNCA	54	BP
GO:0071867	response to monoamine	23/1159	108/18903	1.25391e-07	6.86e-07	2.43402e-07	CHRM3/HDAC2/CHRM1/MAPK3/PDE4B/HRH3/MAPK1/GNB1/HRH4/ABL1/FLNA/KCNQ1/GSK3B/DRD2/PKLR/LRRK2/PRKACA/DRD1/NR4A3/DRD3/SRD5A1/SNCA/CHRM5	23	BP
GO:0071869	response to catecholamine	23/1159	108/18903	1.25391e-07	6.86e-07	2.43402e-07	CHRM3/HDAC2/CHRM1/MAPK3/PDE4B/HRH3/MAPK1/GNB1/HRH4/ABL1/FLNA/KCNQ1/GSK3B/DRD2/PKLR/LRRK2/PRKACA/DRD1/NR4A3/DRD3/SRD5A1/SNCA/CHRM5	23	BP
GO:0032148	activation of protein kinase B activity	12/1159	31/18903	1.2659e-07	6.9e-07	2.44853e-07	IL18/SRC/MTOR/NRG1/PDPK1/ADRA2A/ANG/INSR/PARK7/PPIA/FGF1/ADRA2C	12	BP
GO:0061437	renal system vasculature development	12/1159	31/18903	1.2659e-07	6.9e-07	2.44853e-07	IL6R/EDNRA/ITGB3/ANGPT1/NOTCH1/CFLAR/EGR1/TEK/AQP1/PDGFRB/HES1/FOXC2	12	BP
GO:0061440	kidney vasculature development	12/1159	31/18903	1.2659e-07	6.9e-07	2.44853e-07	IL6R/EDNRA/ITGB3/ANGPT1/NOTCH1/CFLAR/EGR1/TEK/AQP1/PDGFRB/HES1/FOXC2	12	BP
GO:1902042	negative regulation of extrinsic apoptotic signaling pathway via death domain receptors	12/1159	31/18903	1.2659e-07	6.9e-07	2.44853e-07	ICAM1/NOS3/SERPINE1/HMOX1/GPX1/FGG/CFLAR/RAF1/GSK3B/PARK7/BCL2L1/BRCA1	12	BP
GO:0035307	positive regulation of protein dephosphorylation	15/1159	49/18903	1.29847e-07	7.06e-07	2.50481e-07	TGFB1/ADORA1/JAK2/MTOR/PIN1/PTPRC/GBA1/PRKCD/DLC1/PTBP1/PDGFRB/PPP1R15A/PPIA/ITGA1/CALM1	15	BP
GO:0043330	response to exogenous dsRNA	15/1159	49/18903	1.29847e-07	7.06e-07	2.50481e-07	IRAK3/NOD2/TLR3/NFKBIA/MAPK3/MAPK1/MAVS/IFIH1/CAV1/RIPK2/DDX1/IFNA2/IFNA6/FLOT1/CGAS	15	BP
GO:1903426	regulation of reactive oxygen species biosynthetic process	15/1159	49/18903	1.29847e-07	7.06e-07	2.50481e-07	ALOX5/TLR4/RHOA/MMP8/FYN/SOD2/PLCG2/FOXO3/CFLAR/PPARA/PARK7/SPHK2/PIKFYVE/TRAP1/SNCA	15	BP
GO:1904375	regulation of protein localization to cell periphery	25/1159	125/18903	1.31853e-07	7.16e-07	2.54125e-07	TNF/TGFB1/EGFR/ITGB1/AR/LRP1/AKT1/PDPK1/MMP14/DAG1/PLK1/ACTB/BCL2L1/PIK3R1/CLTC/GNAI1/EPHA2/SQSTM1/KIF5B/PRKCH/PICALM/GPER1/HRAS/RAP1A/CIB1	25	BP
GO:0030308	negative regulation of cell growth	32/1159	188/18903	1.33907e-07	7.27e-07	2.57853e-07	TGFB1/SMAD3/CDH1/ENPP1/CYP27B1/G6PD/SPP1/TP53/ACVRL1/IFRD1/ENO1/HSPA1A/BDKRB1/SIRT1/CDKN2A/HYAL1/GJA1/BCL6/AGT/PHB1/PPARA/SMARCA4/CDKN1A/SFRP1/ESR2/SPHK2/ADIPOR1/HNF4A/PPT1/FBP1/PPARD/NPR1	32	BP
GO:0035812	renal sodium excretion	10/1159	21/18903	1.36775e-07	7.41e-07	2.62908e-07	TACR1/ADORA1/EDNRB/AGTR1/AGT/DRD2/AVPR2/ATP6V1B1/DRD3/NPR1	10	BP
GO:0090026	positive regulation of monocyte chemotaxis	10/1159	21/18903	1.36775e-07	7.41e-07	2.62908e-07	PLA2G7/CCL5/SERPINE1/CXCL10/CX3CR1/HMGB1/CCR2/CXCL12/CCR1/FPR2	10	BP
GO:0021782	glial cell development	24/1159	117/18903	1.42056e-07	7.69e-07	2.72817e-07	TNF/TLR4/IL6/IL1B/TLR2/C5AR1/LYN/SOD1/SHH/PTEN/ITGB4/ANO1/LRP1/NR1D1/CLU/NRG1/AKT1/PLEC/DAG1/KRAS/DRD1/MAPT/ILK/ADGRG6	24	BP
GO:0033574	response to testosterone	14/1159	43/18903	1.43478e-07	7.76e-07	2.75305e-07	NQO1/AR/SPP1/SIRT1/GBA1/IGF1R/CFLAR/NCF1/THBS1/RPS6KB1/ROCK2/MTAP/ELK1/SRD5A1	14	BP
GO:0002726	positive regulation of T cell cytokine production	11/1159	26/18903	1.44306e-07	7.78e-07	2.7616e-07	IL4/IL6/IL1B/IL18/IL1R1/NLRP3/TNFSF4/TRAF6/MALT1/MAP3K7/CD81	11	BP
GO:0036119	response to platelet-derived growth factor	11/1159	26/18903	1.44306e-07	7.78e-07	2.7616e-07	TLR4/ITGB3/HDAC1/FYN/SRC/DDIT3/HYAL1/ATP7A/PDGFRB/CCNA2/MARS1	11	BP
GO:1903798	regulation of miRNA maturation	11/1159	26/18903	1.44306e-07	7.78e-07	2.7616e-07	TNF/TGFB1/IL6/EGFR/ESR1/TP53/ZMPSTE24/MAP2K1/RIPK1/LIN28A/MAP2K2	11	BP
GO:0008207	C21-steroid hormone metabolic process	13/1159	37/18903	1.44543e-07	7.79e-07	2.76368e-07	BMP6/AKR1C3/BMP2/EDNRB/AKR1B1/EGR1/HSD3B1/SCNN1B/CYP17A1/CACNA1H/AFP/SRD5A1/AKR1C1	13	BP
GO:0045786	negative regulation of cell cycle	53/1159	405/18903	1.44728e-07	7.79e-07	2.76417e-07	TNF/TGFB1/CCL2/PTGS2/MAPK14/DUSP1/CASP3/CTNNB1/PTEN/MUC1/CCND1/TP53/BMP2/GAS1/CDK2/SIRT1/CDKN2A/CEBPA/CRY1/BCL6/TNKS/ACVR1/ABL1/MDM2/PRKDC/APC/ATM/TOPBP1/CHEK1/NR4A1/NBN/CDKN1A/MEN1/PLK1/BRD7/MRE11/TP53BP1/FZR1/BRCA1/IPO7/ESPL1/E2F1/NEK2/CDC45/RAD51/HEXIM1/SUV39H1/HPGD/GPER1/CHEK2/ATR/CDK1/TAOK1	53	BP
GO:0030193	regulation of blood coagulation	18/1159	70/18903	1.44849e-07	7.79e-07	2.76417e-07	NOS3/SERPINE1/NFE2L2/F2RL1/F2R/PRKG1/THBD/CAV1/ANXA2/F3/FGG/F2/PRKCD/THBS1/PDGFA/PRDX2/F12/HPSE	18	BP
GO:0034250	positive regulation of cellular amide metabolic process	30/1159	170/18903	1.44951e-07	7.79e-07	2.76417e-07	TNF/CCL5/IL6/NOD2/NFE2L2/RHOA/CASP3/MTOR/ERBB2/CLU/PKM/CYP1B1/YTHDF1/RELA/PRKCD/PRKDC/THBS1/PLD1/PABPC1/SPHK2/YBX1/ELAVL1/RPS6KB1/ROCK2/FXR1/PTK2B/PICALM/LIN28A/PPP1R15A/TENT4A	30	BP
GO:0043331	response to dsRNA	16/1159	56/18903	1.45517e-07	7.81e-07	2.77253e-07	IRAK3/NOD2/TLR3/NFKBIA/NFKB1/MAPK3/MAPK1/MAVS/IFIH1/CAV1/RIPK2/DDX1/IFNA2/IFNA6/FLOT1/CGAS	16	BP
GO:0009144	purine nucleoside triphosphate metabolic process	38/1159	247/18903	1.4568e-07	7.81e-07	2.77318e-07	IL4/TGFB1/PARP1/RHOA/ENPP1/MTOR/EP300/HIF1A/ENO1/HSPA1A/PRKAA2/PKM/PPARA/NT5E/HSPA8/PGK1/PPARGC1A/INSR/SAMHD1/PFKM/ARNT/MYH7/ALDOA/RAN/NME1/PKLR/SPHK2/LRRK2/HK1/PFKL/ATP6V1B1/IMPDH1/NMNAT1/FBP1/PRKAA1/OPA1/DNM1L/ADK	38	BP
GO:0048041	focal adhesion assembly	20/1159	85/18903	1.46845e-07	7.87e-07	2.79292e-07	SMAD3/RHOA/VEGFA/SRC/PTEN/ACVRL1/KDR/ABL1/RAC1/MMP14/DLC1/TEK/THBS1/SFRP1/PTK2/PIP5K1A/ROCK2/PTK2B/DUSP22/ROCK1	20	BP
GO:0072006	nephron development	28/1159	152/18903	1.48303e-07	7.94e-07	2.81816e-07	IL6R/EDNRA/ITGB3/STAT1/ANGPT1/VEGFA/PTCH1/SHH/CTNNB1/NOTCH1/ERBB4/BMP2/EDNRB/MYC/AGT/SIX1/CFLAR/EGR1/PKD1/TEK/AQP1/PDGFRB/JAG1/HES1/FOXC2/ILK/FGF1/YAP1	28	BP
GO:0010573	vascular endothelial growth factor production	17/1159	63/18903	1.49754e-07	8e-07	2.83962e-07	TNF/TGFB1/IL6/IL1B/PTGS2/IL6R/IL1A/C5AR1/C3/CCR2/RORA/HIF1A/CYP1B1/NOX1/ARNT/BRCA1/HPSE	17	BP
GO:0030038	contractile actin filament bundle assembly	23/1159	109/18903	1.49825e-07	8e-07	2.83962e-07	SMAD3/TACR1/CCN2/RHOA/SRC/TGFBR1/MTOR/APOA1/RAPGEF3/TJP1/S1PR1/ARRB1/ABL1/RAC1/DLC1/SFRP1/PIK3R1/TPM1/ROCK2/CDC42/LIMK1/PTK2B/ROCK1	23	BP
GO:0043149	stress fiber assembly	23/1159	109/18903	1.49825e-07	8e-07	2.83962e-07	SMAD3/TACR1/CCN2/RHOA/SRC/TGFBR1/MTOR/APOA1/RAPGEF3/TJP1/S1PR1/ARRB1/ABL1/RAC1/DLC1/SFRP1/PIK3R1/TPM1/ROCK2/CDC42/LIMK1/PTK2B/ROCK1	23	BP
GO:1905477	positive regulation of protein localization to membrane	22/1159	101/18903	1.54003e-07	8.22e-07	2.91624e-07	TNF/ITGB2/ITGAM/EGFR/ITGB1/GZMB/FYN/ERBB2/MAPK8/LRP1/AKT1/PDPK1/PIK3R1/CD81/EPHA2/SQSTM1/KIF5B/PRKCH/NMT1/GPER1/HRAS/CIB1	22	BP
GO:0098659	inorganic cation import across plasma membrane	25/1159	126/18903	1.55051e-07	8.26e-07	2.93097e-07	TRPV1/FYN/KCNJ11/ABCC8/ATP4A/SCNN1A/MS4A1/CACNA1C/KCNQ1/SCNN1G/TRPV2/KCNJ1/SLC5A1/TRPM2/SLC12A2/P2RX1/SLC34A1/SLC8A1/SCNN1B/WNK1/ATP1A1/CACNA2D1/SLC12A1/TRPV5/KCNJ5	25	BP
GO:0099587	inorganic ion import across plasma membrane	25/1159	126/18903	1.55051e-07	8.26e-07	2.93097e-07	TRPV1/FYN/KCNJ11/ABCC8/ATP4A/SCNN1A/MS4A1/CACNA1C/KCNQ1/SCNN1G/TRPV2/KCNJ1/SLC5A1/TRPM2/SLC12A2/P2RX1/SLC34A1/SLC8A1/SCNN1B/WNK1/ATP1A1/CACNA2D1/SLC12A1/TRPV5/KCNJ5	25	BP
GO:0031346	positive regulation of cell projection organization	48/1159	352/18903	1.62249e-07	8.63e-07	3.06436e-07	NFE2L2/F2RL1/LYN/CXCL12/CCR7/VEGFA/HSP90AA1/FYN/SRC/CCL19/TGFBR1/CX3CL1/MTOR/RAC2/EP300/CCL21/P2RY12/AGT/KIT/ATP7A/ABL1/IGF1R/CFLAR/FLNA/DVL1/APC/RAC1/TRPV2/NTRK1/CNR1/MAP2K1/GSK3B/EHD1/LTK/PIK3R1/HSPA5/PIK3CA/CDC42/LIMK1/DVL2/SERPINF1/PTK2B/MAPT/MAP2K2/HRAS/PAK3/RAP1A/TRPC5	48	BP
GO:0045913	positive regulation of carbohydrate metabolic process	19/1159	78/18903	1.66723e-07	8.86e-07	3.14339e-07	NFKB1/SRC/GPT/MTOR/HIF1A/PRKAA2/ADCYAP1R1/SIRT1/AKT1/PPARA/PPARGC1A/INSR/P2RY1/GCG/ARNT/PRKAA1/IRS1/GPER1/SNCA	19	BP
GO:0055117	regulation of cardiac muscle contraction	19/1159	78/18903	1.66723e-07	8.86e-07	3.14339e-07	NOS1/PDE4D/ADORA1/CCN2/ACE2/HSP90AA1/PDE4B/ATP2A2/NPPA/CAV1/GSTO1/CACNA1C/KCNQ1/SLC8A1/PDE5A/ATP2A1/ADRA1A/PRKACA/CALM1	19	BP
GO:0044270	cellular nitrogen compound catabolic process	59/1159	474/18903	1.68391e-07	8.94e-07	3.17207e-07	HNMT/IL6/HMOX1/PDE4D/SLC11A1/PRKCA/XDH/CYP3A4/MAPK14/IDO1/PDE4B/ENPP1/ABCC1/BAX/APOBEC3C/HSPA1A/AKT1/PKP1/YTHDF1/TET1/PRKCD/ATM/NEIL1/NT5E/ANG/SLCO1B1/DNASE1/ENTPD1/SAMHD1/APEX1/HPRT1/PDE7A/TRAF3IP2/FEN1/HINT1/PABPC4/NUDT3/PDE5A/PABPC1/YBX1/ELAVL1/UPB1/ROCK2/E2F1/FXR1/BHMT/UGT1A1/IKBKE/LIN28A/NUDT1/APOBEC3B/TENT4A/NIT1/ENTPD2/ROCK1/MAPKAPK2/ABCC2/DPEP1/IDO2	59	BP
GO:0043433	negative regulation of DNA-binding transcription factor activity	32/1159	190/18903	1.72133e-07	9.13e-07	3.23975e-07	IRAK3/NOD2/TLR9/HMOX1/NLRP3/NFKBIA/TNFSF4/HDAC2/TNFRSF4/ADORA3/CHUK/IRAK1/PTCH1/ESR1/DDIT3/CYP1B1/SIRT1/CDKN2A/ARRB1/TAX1BP1/FLNA/PKD1/MEN1/ITCH/PRDX2/HES1/E2F1/TCF7L2/CMKLR1/PIM1/IRAK2/KEAP1	32	BP
GO:0060966	regulation of gene silencing by RNA	15/1159	50/18903	1.7504e-07	9.27e-07	3.2916e-07	TNF/TGFB1/IL6/PPARG/EGFR/ESR1/TP53/ZMPSTE24/MAP2K1/POU5F1/RIPK1/ELAVL1/FXR1/LIN28A/MAP2K2	15	BP
GO:0001704	formation of primary germ layer	25/1159	127/18903	1.81976e-07	9.63e-07	3.41906e-07	SMAD3/SMAD2/ITGB2/ITGB3/MMP2/DUSP1/ITGB1/MMP8/CTNNB1/ITGB4/HMGA2/GJA1/DKK1/ACVR1/MMP14/DUSP2/MAP2K1/POU5F1/LEF1/FOXC2/AXIN1/EPHA2/SETD2/PRKACA/GRB2	25	BP
GO:0032922	circadian regulation of gene expression	18/1159	71/18903	1.83021e-07	9.68e-07	3.43571e-07	HDAC2/AHR/HDAC1/RORA/RORC/NR1D1/SIRT1/CRY1/CRY2/EGR1/PPARA/HDAC3/NAMPT/PPARGC1A/KMT2A/DRD2/HUWE1/DRD3	18	BP
GO:0010763	positive regulation of fibroblast migration	9/1159	17/18903	1.84381e-07	9.74e-07	3.45525e-07	TGFB1/ITGB3/ITGB1/AKT1/AQP1/THBS1/PTK2/SLC8A1/PAK3	9	BP
GO:0090594	inflammatory response to wounding	9/1159	17/18903	1.84381e-07	9.74e-07	3.45525e-07	ALOX5/TGFB1/TLR4/IL1A/HMOX1/PPARG/CCR2/F2R/HIF1A	9	BP
GO:0001823	mesonephros development	22/1159	102/18903	1.85125e-07	9.77e-07	3.4662e-07	SMAD3/SMAD2/VEGFA/PTCH1/SHH/CTNNB1/BMP2/MYC/AGT/EPCAM/SIX1/PKD1/REN/SFRP1/BMPER/SDC1/RARA/HES1/FOXC2/RARB/ILK/FGF1	22	BP
GO:0002793	positive regulation of peptide secretion	21/1159	94/18903	1.86217e-07	9.82e-07	3.48364e-07	ADORA1/CD38/JAK2/CASR/ANO1/HIF1A/FGG/AIMP1/TRPM2/RBP4/GCG/PFKM/DRD2/OSBP/TCF7L2/GPR68/GABBR1/PPARD/GPER1/FFAR4/FFAR1	21	BP
GO:0002863	positive regulation of inflammatory response to antigenic stimulus	8/1159	13/18903	1.90289e-07	1e-06	3.55675e-07	TNF/LTA/C3/BTK/CCR7/CNR1/PARK7/CD81	8	BP
GO:0032770	positive regulation of monooxygenase activity	12/1159	32/18903	1.91264e-07	1.01e-06	3.57188e-07	TNF/IL1B/NOD1/VDR/CYP27B1/HIF1A/AKT1/ATP7A/PARK7/CDH3/PTK2B/SCARB1	12	BP
GO:0035966	response to topologically incorrect protein	29/1159	163/18903	1.94513e-07	1.02e-06	3.62943e-07	NFE2L2/HSP90AA1/CCND1/EP300/DDIT3/BAX/HSPB1/HSPD1/CLU/HSPA1A/STUB1/CTH/HSPA8/THBS1/BAG3/PIK3R1/HSPA1L/HDAC6/BCL2L11/HSPA5/SERPINH1/DNAJA1/HSPE1/HSPH1/XBP1/BAK1/PPP1R15A/PTPN1/F12	29	BP
GO:1903305	regulation of regulated secretory pathway	27/1159	145/18903	1.9617e-07	1.03e-06	3.6572e-07	IL4R/IL4/HMOX1/ITGB2/F2RL1/ITGAM/LYN/CCR2/ATP2A2/RAC2/NOTCH1/PDPK1/ADRA2A/DVL1/CNR1/GSK3B/P2RX1/P2RY1/SEPTIN5/DRD2/CACNA1H/SPHK2/LRRK2/ADRA1A/DRD1/ADCY1/RAP1A	27	BP
GO:0015718	monocarboxylic acid transport	24/1159	119/18903	1.98501e-07	1.04e-06	3.69006e-07	TNF/IL1B/NOS2/PTGS2/IL1A/MIF/PLA2G2A/CASR/PTGES/SLC6A12/NMUR2/SLCO1B1/SLC26A6/ABCG2/DRD2/SLC16A1/CES1/ATP8B1/PRKAA1/DRD3/SLCO1A2/SLC27A1/ABCC2/AKR1C1	24	BP
GO:0014075	response to amine	14/1159	44/18903	1.98614e-07	1.04e-06	3.69006e-07	ARG1/EDNRA/NQO1/HDAC2/SOD1/JAK2/CNR2/NR4A1/ASIC1/HPRT1/DRD2/DRD1/GRIN2A/CDK1	14	BP
GO:0072538	T-helper 17 type immune response	14/1159	44/18903	1.98614e-07	1.04e-06	3.69006e-07	IL12B/IL4/IL6/IL6R/IL12RB1/CLEC7A/RORA/JAK2/RORC/NOTCH1/PRKCQ/MALT1/PHB1/TRAF3IP2	14	BP
GO:1903573	negative regulation of response to endoplasmic reticulum stress	14/1159	44/18903	1.98614e-07	1.04e-06	3.69006e-07	ALOX5/CLU/HSPA1A/NR1H2/HYOU1/PARK7/BCL2L1/HSPA5/LRRK2/XBP1/OPA1/PPP1R15A/PTPN1/NR1H3	14	BP
GO:0098926	postsynaptic signal transduction	13/1159	38/18903	2.07413e-07	1.08e-06	3.85022e-07	CHRM3/CHRM1/OPRM1/HRH3/JAK2/GNB1/HRH4/NRG1/RELA/PLCB1/ACHE/GRK2/CHRM5	13	BP
GO:0031532	actin cytoskeleton reorganization	23/1159	111/18903	2.12367e-07	1.11e-06	3.93882e-07	RHOA/GAB1/RAPGEF3/TJP1/S1PR1/HAX1/CSF1R/KIT/ABL1/FLNA/TEK/PLEC/TRPM2/PIP5K1A/HCK/SHC1/CDC42/PTK2B/GRB2/S1PR2/PTPN1/HRAS/ARHGDIA	23	BP
GO:0046486	glycerolipid metabolic process	52/1159	399/18903	2.16247e-07	1.13e-06	4.00735e-07	PLA2G7/ALOX15/C3/PON1/PLA2G2A/PLCG2/PTEN/CAV1/APOA1/GPX1/ABHD5/SLC22A4/SIRT1/PLCB3/BECN1/CSF1R/NR1H2/PRDX6/PIK3C2A/PLCB1/ATM/ANG/G6PC1/PIP5K1B/PDGFA/AGPAT1/PIP5K1A/PDGFRB/PIK3R1/KAT5/PLD1/CAPN2/LPCAT1/PIK3CA/DGAT1/PTDSS1/CEPT1/PCSK9/PIKFYVE/SCARB1/INPP5D/PNPLA2/MGLL/PIP4K2A/INPP4B/SLC44A4/LCLAT1/PLA2G15/SLC27A1/NR1H3/PLCG1/CHRM5	52	BP
GO:0001523	retinoid metabolic process	20/1159	87/18903	2.20939e-07	1.15e-06	4.0873e-07	CYP3A4/CYP1A2/CYP1A1/AKR1C3/ADH5/LRP1/CYP1B1/AKR1B1/CYP26A1/CYP2C8/ADH1C/RBP4/ALDH1A2/ADH1B/DGAT1/UGT1A1/PNPLA2/TTR/PPARD/AKR1C1	20	BP
GO:0050672	negative regulation of lymphocyte proliferation	20/1159	87/18903	2.20939e-07	1.15e-06	4.0873e-07	CD86/ARG1/CD80/LYN/IDO1/BTK/CASP3/CEBPB/SHH/PTEN/ERBB2/VSIR/CD274/CR1/PDCD1LG2/ATM/ITCH/PTPN6/PDE5A/INPP5D	20	BP
GO:1903322	positive regulation of protein modification by small protein conjugation or removal	26/1159	137/18903	2.2252e-07	1.16e-06	4.11305e-07	NOD2/ANGPT1/TRAF6/PTEN/CAV1/BIRC3/XIAP/MALT1/RIPK2/PIN1/CRY1/STUB1/HDAC3/SKP2/PLK1/ARNT/FZR1/PEF1/BRCA1/HSPA5/HUWE1/AXIN1/LRRK2/BIRC2/BMI1/SPHK1	26	BP
GO:0034109	homotypic cell-cell adhesion	21/1159	95/18903	2.25414e-07	1.17e-06	4.16297e-07	CCL5/IL6/JAK1/ITGB3/LYN/PRKCA/PRKG1/JAK2/HSPB1/PRKCQ/P2RY12/FGG/PRKCD/FLNA/ACTB/PTPN6/SLC7A11/PDPN/ILK/PPIA/CSRP1	21	BP
GO:0035148	tube formation	28/1159	155/18903	2.26683e-07	1.18e-06	4.18285e-07	TGFB1/VEGFA/CASP3/PTCH1/SHH/ST14/CTNNB1/TRAF6/NOTCH1/HIF1A/BRD2/SIX1/ABL1/DVL1/DLC1/SFRP1/YWHAZ/RARA/BCL2L11/STK4/MTHFD1/SETD2/PRKACA/PRKACB/DVL2/OPA1/MTHFD1L/KIF20B	28	BP
GO:0001783	B cell apoptotic process	11/1159	27/18903	2.30031e-07	1.19e-06	4.22917e-07	MIF/LYN/BTK/PDCD1/PTEN/BAX/BCL6/FNIP1/TRAF3IP2/BAK1/CD74	11	BP
GO:0032740	positive regulation of interleukin-17 production	11/1159	27/18903	2.30031e-07	1.19e-06	4.22917e-07	IL12B/TGFB1/IL6/IL18/NOD2/BTK/JAK2/PRKCQ/PHB1/SLC7A5/SPHK1	11	BP
GO:1901623	regulation of lymphocyte chemotaxis	11/1159	27/18903	2.30031e-07	1.19e-06	4.22917e-07	CCL5/CCL2/CXCL10/CCR2/ADAM17/CCL21/CXCL13/OXSR1/WNK1/PTK2B/KLRK1	11	BP
GO:0033143	regulation of intracellular steroid hormone receptor signaling pathway	18/1159	72/18903	2.30169e-07	1.19e-06	4.22917e-07	PARP1/RHOA/HDAC1/AR/SRC/EP300/SIRT1/CRY1/CRY2/PHB1/SKP2/SMARCA4/SFRP1/PARK7/HDAC6/KDM4C/BRCA1/YAP1	18	BP
GO:0070265	necrotic cell death	18/1159	72/18903	2.30169e-07	1.19e-06	4.22917e-07	TNF/TLR3/CASP8/PARP1/FAS/TP53/CAV1/BAX/BIRC3/MAP3K5/CFLAR/RIPK1/BIRC2/RNF31/PYGL/ITPK1/TRPM7/DNM1L	18	BP
GO:0032873	negative regulation of stress-activated MAPK cascade	15/1159	51/18903	2.33999e-07	1.21e-06	4.28863e-07	GSTP1/F2RL1/DUSP1/NPPA/MYC/DUSP10/PRMT1/HDAC3/MEN1/SFRP1/ITCH/DNAJA1/ZMYND11/MECOM/PPIA	15	BP
GO:0050982	detection of mechanical stimulus	15/1159	51/18903	2.33999e-07	1.21e-06	4.28863e-07	TNF/TRPA1/CXCL12/CXCR4/FYN/CTNNB1/KIT/KCNQ1/PKD1/NTRK1/PTK2/ASIC3/KCNA1/PIEZO1/SCN1A	15	BP
GO:0070303	negative regulation of stress-activated protein kinase signaling cascade	15/1159	51/18903	2.33999e-07	1.21e-06	4.28863e-07	GSTP1/F2RL1/DUSP1/NPPA/MYC/DUSP10/PRMT1/HDAC3/MEN1/SFRP1/ITCH/DNAJA1/ZMYND11/MECOM/PPIA	15	BP
GO:0006644	phospholipid metabolic process	51/1159	389/18903	2.34456e-07	1.21e-06	4.29337e-07	PLA2G7/ALOX15/PON1/PLA2G2A/PLCG2/PTEN/APOA1/ABHD5/GPX4/PLCB3/BECN1/CSF1R/NR1H2/PRDX6/PIK3C2A/PLCB1/PRKCD/ATM/HEXB/PIP5K1B/PDGFA/AGPAT1/SPTLC1/FADS1/PIP5K1A/PDGFRB/PIK3R1/PLD1/CAPN2/LPCAT1/PIK3CA/SPHK2/PTDSS1/OSBP/CEPT1/PCSK9/PIKFYVE/SCARB1/INPP5D/PIP4K2A/INPP4B/SLC44A4/LCLAT1/PLA2G15/SLC27A1/NR1H3/PPARD/SNCA/PLCG1/FDPS/CHRM5	51	BP
GO:0055088	lipid homeostasis	30/1159	174/18903	2.45513e-07	1.27e-06	4.49204e-07	IL18/PPARG/ADORA1/RORA/CAV1/APOA1/ABHD5/ABCA1/NR1D1/PRKAA2/SIRT1/EPHX2/CEBPA/SOAT1/NR1H2/FABP4/G6PC1/EHD1/XBP1/HNF4A/DGAT1/NPC1/CES1/ACACA/PCSK9/SCARB1/PRKAA1/PNPLA2/NR1H3/AKR1C1	30	BP
GO:0031100	animal organ regeneration	17/1159	65/18903	2.45732e-07	1.27e-06	4.49227e-07	TNF/IL6/HMOX1/CXCL12/CEBPB/PTCH1/CCND1/NOTCH1/CCNA2/BAK1/AURKA/UGT1A1/NR4A3/SLC7A5/CDK1/PGF/LCP1	17	BP
GO:0046700	heterocycle catabolic process	58/1159	468/18903	2.48407e-07	1.28e-06	4.53474e-07	HNMT/IL6/HMOX1/NFE2L2/PDE4D/SLC11A1/PRKCA/XDH/MAPK14/IDO1/PDE4B/ENPP1/CYP1A1/ABCC1/BAX/APOBEC3C/HSPA1A/AKT1/PKP1/YTHDF1/TET1/PRKCD/ATM/NEIL1/NT5E/ANG/SLCO1B1/DNASE1/ENTPD1/SAMHD1/APEX1/HPRT1/PDE7A/TRAF3IP2/FEN1/HINT1/PABPC4/NUDT3/PDE5A/PABPC1/YBX1/ELAVL1/UPB1/ROCK2/E2F1/FXR1/UGT1A1/IKBKE/LIN28A/NUDT1/APOBEC3B/TENT4A/ENTPD2/ROCK1/MAPKAPK2/ABCC2/DPEP1/IDO2	58	BP
GO:0001541	ovarian follicle development	16/1159	58/18903	2.48683e-07	1.28e-06	4.53474e-07	MMP2/VEGFA/CEBPB/SRC/SOD1/ESR1/FOXO3/BAX/KDR/CTNNA1/KIT/MMP14/ATM/ANG/BCL2L1/EREG	16	BP
GO:0001961	positive regulation of cytokine-mediated signaling pathway	16/1159	58/18903	2.48683e-07	1.28e-06	4.53474e-07	IL1R1/CSF1/CXCR4/CASP1/ADAM17/MAVS/HIF1A/HSPA1A/RIPK2/CASP4/IRGM/AGPAT1/RIPK1/TBK1/IKBKE/CD74	16	BP
GO:0014902	myotube differentiation	25/1159	129/18903	2.49243e-07	1.28e-06	4.53731e-07	IL4R/IL4/NOS1/CXCL10/MAPK14/ITGB1/SHH/MTOR/GPX1/NOTCH1/DOCK1/SIX1/CFLAR/MMP14/SMYD3/PLEC/RYR1/EHD1/CD81/CAPN2/CACNA1H/XBP1/FLOT1/PIEZO1/SORT1	25	BP
GO:0031570	DNA integrity checkpoint signaling	25/1159	129/18903	2.49243e-07	1.28e-06	4.53731e-07	MAPK14/MUC1/CCND1/TP53/CDK2/CRY1/MDM2/PRKDC/ATM/TOPBP1/CHEK1/NBN/CDKN1A/PLK1/MRE11/TP53BP1/FZR1/BRCA1/E2F1/CDC45/RAD51/CHEK2/ATR/CDK1/TAOK1	25	BP
GO:0017015	regulation of transforming growth factor beta receptor signaling pathway	27/1159	147/18903	2.61917e-07	1.34e-06	4.76401e-07	TGFB1/SMAD3/IL17F/SMAD2/PPARG/CREBBP/HDAC2/HDAC1/ADAM17/TP53/CAV1/EP300/BMP2/HSPA1A/SIRT1/PIN1/PDPK1/TET1/STUB1/PPARA/THBS1/MEN1/SMURF2/HSPA5/AXIN1/PRDM16/ZEB1	27	BP
GO:0030258	lipid modification	34/1159	213/18903	2.69135e-07	1.38e-06	4.89121e-07	ALOX5/PLA2G7/ALOX15/CYP3A4/MAPK14/CYP1A1/PTEN/ADH5/APOA1/ABO/EPHX2/AKT1/GBA1/SOAT1/PPARA/CYP2C8/CNR1/PPARGC1A/HSD17B4/FABP1/CYP4F2/HAO1/SPHK2/ADIPOR1/PEX2/NR4A3/PRKAA1/INPP5D/INPP4B/BDH2/SPHK1/IRS1/PPARD/CHRM5	34	BP
GO:0032945	negative regulation of mononuclear cell proliferation	20/1159	88/18903	2.69624e-07	1.38e-06	4.89188e-07	CD86/ARG1/CD80/LYN/IDO1/BTK/CASP3/CEBPB/SHH/PTEN/ERBB2/VSIR/CD274/CR1/PDCD1LG2/ATM/ITCH/PTPN6/PDE5A/INPP5D	20	BP
GO:1901983	regulation of protein acetylation	20/1159	88/18903	2.69624e-07	1.38e-06	4.89188e-07	NOS1/HDAC2/MUC1/PRKAA2/RAPGEF3/SIRT1/ARRB1/ZMPSTE24/CHEK1/PPARGC1A/GSK3B/BRD7/PARK7/KMT2A/KAT5/BRCA1/SPHK2/PRKAA1/SNCA/TAOK1	20	BP
GO:0000077	DNA damage checkpoint signaling	24/1159	121/18903	2.75059e-07	1.4e-06	4.98214e-07	MAPK14/MUC1/CCND1/TP53/CDK2/CRY1/MDM2/PRKDC/ATM/TOPBP1/CHEK1/NBN/CDKN1A/PLK1/MRE11/TP53BP1/FZR1/BRCA1/E2F1/RAD51/CHEK2/ATR/CDK1/TAOK1	24	BP
GO:2000278	regulation of DNA biosynthetic process	24/1159	121/18903	2.75059e-07	1.4e-06	4.98214e-07	TNF/MAPK3/HSP90AA1/SRC/MAPK1/CTNNB1/TP53/ACVRL1/CYP1B1/PRKCQ/MYC/TNKS/NOX4/ATM/CHEK1/CDKN1A/MEN1/CCT8/PDGFRB/NEK2/CCT5/PTK2B/ATR/PAK3	24	BP
GO:0001782	B cell homeostasis	12/1159	33/18903	2.83824e-07	1.45e-06	5.13661e-07	MIF/LYN/TNFSF13B/CASP3/BAX/HIF1A/ABL1/SOS1/TRAF3IP2/BCL2L11/BAK1/CD74	12	BP
GO:0007517	muscle organ development	47/1159	348/18903	2.90309e-07	1.48e-06	5.2496e-07	TGFB1/SMAD3/CXCL10/EDNRA/CREB1/MAPK14/ITGB1/RHOA/TAGLN/FOS/TGFBR1/SHH/CTNNB1/CAV1/GPX1/NOTCH1/EP300/BMP2/NRG1/SIRT1/S1PR1/ACVR1/SIX1/CFLAR/EGR1/NR4A1/PLEC/HBEGF/CHRNA1/DAG1/RYR1/FLNB/MYH7/LEF1/PTCD2/FOXC2/TPM1/CACNA1H/XBP1/RPS6KB1/KRAS/FXR1/FLOT1/LARGE1/EPHB1/PRKAA1/ETV1	47	BP
GO:0050864	regulation of B cell activation	33/1159	204/18903	2.93035e-07	1.49e-06	5.28915e-07	IL4/TGFB1/TLR4/IL6/NOD2/TLR9/MIF/LYN/TNFSF4/BTK/AHR/TNFRSF4/TNFSF13B/CD38/CASP3/PTEN/TFRC/BCL6/PTPRC/CR1/MMP14/ATM/CDKN1A/BST1/SFRP1/PTPN6/TP53BP1/CD81/XBP1/INPP5D/BMI1/CD74/TNFSF13	33	BP
GO:0032373	positive regulation of sterol transport	13/1159	39/18903	2.93717e-07	1.49e-06	5.28915e-07	PPARG/NFKBIA/PON1/PTCH1/CAV1/APOA1/ABCA1/LRP1/ANXA2/SIRT1/NR1H2/CES1/NR1H3	13	BP
GO:0032376	positive regulation of cholesterol transport	13/1159	39/18903	2.93717e-07	1.49e-06	5.28915e-07	PPARG/NFKBIA/PON1/PTCH1/CAV1/APOA1/ABCA1/LRP1/ANXA2/SIRT1/NR1H2/CES1/NR1H3	13	BP
GO:0032570	response to progesterone	13/1159	39/18903	2.93717e-07	1.49e-06	5.28915e-07	TGFB1/TLR2/TACR1/CD38/FOS/SRC/CAV1/CYP1B1/IGF1R/THBS1/FOSB/YAP1/NR1H3	13	BP
GO:0044060	regulation of endocrine process	13/1159	39/18903	2.93717e-07	1.49e-06	5.28915e-07	F2RL1/CRHR1/F2R/BMP6/SPP1/AGTR1/GJA1/CRY1/CRY2/AGT/REN/OPRK1/GALR1	13	BP
GO:0008203	cholesterol metabolic process	26/1159	139/18903	2.99643e-07	1.52e-06	5.3869e-07	IL4/PON1/CYP3A4/CYP1A2/SOD1/G6PD/APOA1/EBP/ABCA1/PRKAA2/EPHX2/CYP2C9/CEBPA/GBA1/SOAT1/HMGCR/SULT2B1/DHCR24/NPC1/CES1/PCSK9/SCARB1/PRKAA1/FGF1/PPARD/FDPS	26	BP
GO:0008277	regulation of G protein-coupled receptor signaling pathway	26/1159	139/18903	2.99643e-07	1.52e-06	5.3869e-07	ADRB2/CXCL8/CCL5/C3/ITGB3/PRKCA/OPRM1/PDE4B/F2/ARRB1/CRY1/RAMP1/PLCB1/PHB1/GRM5/YWHAB/DRD2/ROCK2/GRK1/GRK2/DRD3/MGLL/NMT1/ROCK1/GPER1/SNCA	26	BP
GO:0006968	cellular defense response	15/1159	52/18903	3.10335e-07	1.57e-06	5.56527e-07	IL33/CCR5/C5AR1/CX3CR1/CCR2/CXCR2/CCR6/ITGB1/BECN1/RELA/LY96/NCF1/PRF1/IL1RL2/PTK2B	15	BP
GO:0010543	regulation of platelet activation	15/1159	52/18903	3.10335e-07	1.57e-06	5.56527e-07	TLR4/IL6/NOS3/LYN/PRKCA/PRKG1/JAK2/THBD/PRKCQ/FGG/F2/PRKCD/FLNA/PDGFA/PDPN	15	BP
GO:0051496	positive regulation of stress fiber assembly	15/1159	52/18903	3.10335e-07	1.57e-06	5.56527e-07	SMAD3/TACR1/CCN2/RHOA/TGFBR1/MTOR/APOA1/RAPGEF3/ABL1/RAC1/SFRP1/TPM1/ROCK2/CDC42/LIMK1	15	BP
GO:0010812	negative regulation of cell-substrate adhesion	17/1159	66/18903	3.12236e-07	1.58e-06	5.59472e-07	SERPINE1/RHOA/SRC/CX3CL1/PTEN/ACVRL1/NOTCH1/COL1A1/CDKN2A/BCL6/MMP14/DLC1/THBS1/MEN1/JAG1/PIK3R1/DUSP22	17	BP
GO:0051588	regulation of neurotransmitter transport	22/1159	105/18903	3.16555e-07	1.6e-06	5.66743e-07	NOS1/ITGB3/ITGB1/ATP2A2/ADRA2A/DVL1/CNR1/GSK3B/P2RX1/P2RY1/ASIC1/SEPTIN5/DRD2/LRRK2/ADRA1A/DRD1/FLOT1/ADCY1/DRD3/GPER1/SNCA/RAP1A	22	BP
GO:0050680	negative regulation of epithelial cell proliferation	30/1159	176/18903	3.17237e-07	1.6e-06	5.67494e-07	TNF/ALOX5/IL12B/TGFB1/CCL2/PPARG/STAT1/XDH/FLT1/VDR/AR/TGFBR1/PTCH1/PTEN/CAV1/ACVRL1/NOTCH1/AIMP1/DUSP10/THBS1/MEN1/SFRP1/DRD2/SFN/STK4/SERPINF1/PEX2/EREG/PPARD/ZEB1	30	BP
GO:0043666	regulation of phosphoprotein phosphatase activity	16/1159	59/18903	3.21937e-07	1.62e-06	5.75426e-07	TNF/JAK2/MTOR/IKBKB/CRY2/PTPRC/CSNK2B/HSP90B1/GSK3B/PDGFRB/DRD2/ROCK2/PPP1R15A/ROCK1/ITGA1/CALM1	16	BP
GO:0001542	ovulation from ovarian follicle	7/1159	10/18903	3.26052e-07	1.64e-06	5.81822e-07	NOS3/MMP2/FOXO3/SIRT1/ADAMTS1/AFP/PGR	7	BP
GO:0042045	epithelial fluid transport	7/1159	10/18903	3.26052e-07	1.64e-06	5.81822e-07	CSF2/EDNRB/ITPR1/AQP1/SLC5A1/SLC26A6/SCNN1B	7	BP
GO:0043502	regulation of muscle adaptation	21/1159	97/18903	3.27412e-07	1.64e-06	5.83767e-07	SMAD3/NOS3/PPARG/PRKCA/PARP1/ATP2A2/TNFRSF1A/G6PD/FOXO3/NOTCH1/BECN1/AGT/PPARA/DAG1/MYH7/PDE5A/ADRA1A/RPS6KB1/ROCK2/NR4A3/ROCK1	21	BP
GO:0071229	cellular response to acid chemical	20/1159	89/18903	3.27956e-07	1.65e-06	5.84257e-07	TNF/EGFR/MMP2/VEGFA/FYN/CEBPB/MTOR/CYBB/COL1A1/COL1A2/SIX1/ATP7A/PLEC/BCL2L1/DNMT1/CAPN2/PIK3CA/XBP1/SLC7A5/ZEB1	20	BP
GO:0009913	epidermal cell differentiation	36/1159	235/18903	3.42886e-07	1.72e-06	6.10353e-07	IL1A/HDAC2/VDR/HDAC1/CASP3/SOD1/PTCH1/TGM1/ST14/CTNNB1/CYP27B1/AKR1C3/NOTCH1/TGM3/KCNQ1/PLEC/MAP2K1/SULT2B1/PIP5K1A/FLNB/JAG1/HES1/CDH3/SFN/STK4/EPHA2/ROCK2/PRKCH/NCOA3/SLC44A4/SHARPIN/KRT81/EREG/ROCK1/YAP1/KEAP1	36	BP
GO:1902652	secondary alcohol metabolic process	27/1159	149/18903	3.47586e-07	1.74e-06	6.18211e-07	IL4/PON1/CYP3A4/CYP1A2/SOD1/CYP27B1/G6PD/APOA1/EBP/ABCA1/PRKAA2/EPHX2/CYP2C9/CEBPA/GBA1/SOAT1/HMGCR/SULT2B1/DHCR24/NPC1/CES1/PCSK9/SCARB1/PRKAA1/FGF1/PPARD/FDPS	27	BP
GO:0038128	ERBB2 signaling pathway	9/1159	18/18903	3.48651e-07	1.74e-06	6.19088e-07	EGFR/SRC/ERBB2/ERBB4/NRG1/TGFA/STUB1/HBEGF/EREG	9	BP
GO:0150078	positive regulation of neuroinflammatory response	9/1159	18/18903	3.48651e-07	1.74e-06	6.19088e-07	TNF/IL6/IL33/IL1B/IL18/MMP8/PLCG2/CTSC/LRRK2	9	BP
GO:0007190	activation of adenylate cyclase activity	11/1159	28/18903	3.57902e-07	1.78e-06	6.32405e-07	ADRB2/EDNRA/CRHR1/ADORA3/CALCA/ADRB1/GLP1R/RAF1/AVPR2/DRD1/RXFP1	11	BP
GO:0010758	regulation of macrophage chemotaxis	11/1159	28/18903	3.57902e-07	1.78e-06	6.32405e-07	CCL5/MIF/C5AR1/CSF1/MAPK3/MAPK1/CSF1R/THBS1/PTK2/PTK2B/CMKLR1	11	BP
GO:0014072	response to isoquinoline alkaloid	11/1159	28/18903	3.57902e-07	1.78e-06	6.32405e-07	TACR1/CXCR4/OPRM1/PPP5C/OPRK1/CNR1/FOSB/PCSK1/DRD2/DRD3/MAP1LC3A	11	BP
GO:0043278	response to morphine	11/1159	28/18903	3.57902e-07	1.78e-06	6.32405e-07	TACR1/CXCR4/OPRM1/PPP5C/OPRK1/CNR1/FOSB/PCSK1/DRD2/DRD3/MAP1LC3A	11	BP
GO:0070920	regulation of production of small RNA involved in gene silencing by RNA	11/1159	28/18903	3.57902e-07	1.78e-06	6.32405e-07	TNF/TGFB1/IL6/EGFR/ESR1/TP53/ZMPSTE24/MAP2K1/RIPK1/LIN28A/MAP2K2	11	BP
GO:0071624	positive regulation of granulocyte chemotaxis	11/1159	28/18903	3.57902e-07	1.78e-06	6.32405e-07	IL4/CXCL8/C5AR1/CXCR2/CCR7/CCL19/RAC2/CCL21/RAC1/DNM1L/CD74	11	BP
GO:0002381	immunoglobulin production involved in immunoglobulin-mediated immune response	18/1159	74/18903	3.59154e-07	1.78e-06	6.33068e-07	IL4/TGFB1/HLA-DQA1/TNFSF4/CCR6/BTK/LIG4/TFRC/HSPD1/BCL6/PTPRC/NBN/ERCC1/TP53BP1/TRAF3IP2/EXO1/HLA-DRB3/TNFSF13	18	BP
GO:0048662	negative regulation of smooth muscle cell proliferation	18/1159	74/18903	3.59154e-07	1.78e-06	6.33068e-07	IL12B/NOS3/HMOX1/PPARG/ACE2/RHOA/SOD2/PRKG1/PTEN/BMP2/ANG/CDKN1A/PPARGC1A/TPM1/S1PR2/PPARD/GPER1/NPR1	18	BP
GO:0051145	smooth muscle cell differentiation	18/1159	74/18903	3.59154e-07	1.78e-06	6.33068e-07	EDNRA/VEGFA/SOD2/SHH/CTNNB1/NOTCH1/EDNRB/SIRT1/ACVR1/KIT/SIX1/NFATC1/CTH/HES1/DNMT1/EREG/GPER1/ZEB1	18	BP
GO:2001239	regulation of extrinsic apoptotic signaling pathway in absence of ligand	14/1159	46/18903	3.69212e-07	1.83e-06	6.50268e-07	TNF/IL1B/CSF2/IL1A/CX3CL1/FGFR1/HSPA1A/COL2A1/AKT1/CTNNA1/BCL2L1/PRDX2/RIPK1/MCL1	14	BP
GO:0048708	astrocyte differentiation	19/1159	82/18903	3.87292e-07	1.92e-06	6.81557e-07	TNF/TLR4/IL6/IL1B/C5AR1/MAPK3/MAPK1/SHH/NOTCH1/BMP2/LRP1/NR1D1/F2/ABL1/MAP2K1/HES1/KRAS/DRD1/MAPT	19	BP
GO:0072163	mesonephric epithelium development	21/1159	98/18903	3.92924e-07	1.95e-06	6.90346e-07	SMAD3/SMAD2/VEGFA/PTCH1/SHH/CTNNB1/BMP2/MYC/AGT/EPCAM/SIX1/PKD1/SFRP1/BMPER/SDC1/RARA/HES1/FOXC2/RARB/ILK/FGF1	21	BP
GO:0072164	mesonephric tubule development	21/1159	98/18903	3.92924e-07	1.95e-06	6.90346e-07	SMAD3/SMAD2/VEGFA/PTCH1/SHH/CTNNB1/BMP2/MYC/AGT/EPCAM/SIX1/PKD1/SFRP1/BMPER/SDC1/RARA/HES1/FOXC2/RARB/ILK/FGF1	21	BP
GO:0034695	response to prostaglandin E	10/1159	23/18903	3.96188e-07	1.96e-06	6.95517e-07	TNFSF4/CCR7/CCL19/GNB1/PRKAA2/CCL21/AKT1/SFRP1/ACACA/PRKAA1	10	BP
GO:0051262	protein tetramerization	20/1159	90/18903	3.97631e-07	1.97e-06	6.97486e-07	TRPA1/TRPV1/SOD2/TP53/MS4A1/PKD1/CTH/TRPM2/ALDH1A2/SAMHD1/RYR1/HPRT1/ALDOA/GLS/STK4/UPB1/TRPV5/ACACA/TRPM7/SNCA	20	BP
GO:0009141	nucleoside triphosphate metabolic process	39/1159	267/18903	3.99592e-07	1.97e-06	7.00359e-07	IL4/TGFB1/PARP1/RHOA/ENPP1/MTOR/EP300/HIF1A/ENO1/HSPA1A/PRKAA2/PKM/PPARA/NT5E/HSPA8/PGK1/PPARGC1A/INSR/SAMHD1/PFKM/ARNT/MYH7/ALDOA/RAN/NME1/PKLR/SPHK2/LRRK2/HK1/CTPS1/PFKL/ATP6V1B1/IMPDH1/NMNAT1/FBP1/PRKAA1/OPA1/DNM1L/ADK	39	BP
GO:0006986	response to unfolded protein	26/1159	141/18903	4.00862e-07	1.98e-06	7.01449e-07	NFE2L2/HSP90AA1/CCND1/EP300/DDIT3/BAX/HSPB1/HSPD1/HSPA1A/STUB1/CTH/HSPA8/THBS1/BAG3/PIK3R1/HSPA1L/BCL2L11/HSPA5/SERPINH1/DNAJA1/HSPE1/HSPH1/XBP1/BAK1/PPP1R15A/PTPN1	26	BP
GO:0045667	regulation of osteoblast differentiation	26/1159	141/18903	4.00862e-07	1.98e-06	7.01449e-07	TNF/IL6/SMAD3/IL6R/PPARG/LTF/CEBPB/BMP6/PTCH1/CTNNB1/NOTCH1/BMP2/CEBPA/ACVR1/MEN1/SFRP1/PTK2/JAG1/PRKACA/ILK/IFITM1/YAP1/RORB/FFAR4/ESRRA/CEBPD	26	BP
GO:0009409	response to cold	15/1159	53/18903	4.08456e-07	2.01e-06	7.13584e-07	ADRB2/TRPA1/CXCL10/NFKBIA/CASP8/HSP90AA1/FOS/SOD2/HSPD1/ADRB1/THRA/PRKACA/PRKAA1/SLC27A1/SCN9A	15	BP
GO:0046638	positive regulation of alpha-beta T cell differentiation	15/1159	53/18903	4.08456e-07	2.01e-06	7.13584e-07	IL12B/IL4R/IL18/NLRP3/CD86/IL12RB1/CD80/TNFSF4/RHOA/CCL19/SHH/RUNX1/MALT1/RIPK2/RARA	15	BP
GO:0032941	secretion by tissue	13/1159	40/18903	4.10806e-07	2.02e-06	7.16535e-07	CHRM3/TACR1/ADORA1/CHRM1/ANO1/P2RY2/NR1H2/AQP1/OPRK1/SCNN1B/WNK1/TRAF3IP2/NR1H3	13	BP
GO:0045923	positive regulation of fatty acid metabolic process	13/1159	40/18903	4.10806e-07	2.02e-06	7.16535e-07	IL1B/PTGS2/PPARG/APOA1/NR1H2/PPARA/PPARGC1A/FABP1/NR4A3/IRS1/NR1H3/PPARD/CD74	13	BP
GO:0002711	positive regulation of T cell mediated immunity	16/1159	60/18903	4.14205e-07	2.03e-06	7.19024e-07	IL12B/IL4/IL6/IL1B/IL18/IL1R1/NLRP3/IL12RB1/TNFSF4/TRAF6/HSPD1/MALT1/PTPRC/MAP3K7/CD81/HLA-DRB3	16	BP
GO:0002753	cytoplasmic pattern recognition receptor signaling pathway	16/1159	60/18903	4.14205e-07	2.03e-06	7.19024e-07	TLR4/NOD2/NFKBIA/TRAF6/IFIH1/HSPA1A/BIRC3/XIAP/RIPK2/RELA/MAP3K7/PHB1/USP15/ITCH/IRGM/BIRC2	16	BP
GO:0045599	negative regulation of fat cell differentiation	16/1159	60/18903	4.14205e-07	2.03e-06	7.19024e-07	TNF/TGFB1/IL6/SMAD3/SOD2/RORA/ENPP1/DDIT3/BMP2/SIRT1/JAG1/AXIN1/E2F1/SORT1/YAP1/GPER1	16	BP
GO:0036474	cell death in response to hydrogen peroxide	12/1159	34/18903	4.14225e-07	2.03e-06	7.19024e-07	NFE2L2/FOXO3/ABL1/PARK7/HDAC6/RIPK1/LRRK2/SIGMAR1/PYCR1/NR4A3/TRAP1/GPR37	12	BP
GO:1902624	positive regulation of neutrophil migration	12/1159	34/18903	4.14225e-07	2.03e-06	7.19024e-07	CXCL8/IL1A/IL1R1/C5AR1/CXCR2/CCR7/CCL19/RAC2/CCL21/RAC1/DNM1L/CD74	12	BP
GO:1905144	response to acetylcholine	12/1159	34/18903	4.14225e-07	2.03e-06	7.19024e-07	EDNRA/CHRM3/CHRM1/OPRM1/HRH3/GNB1/HRH4/PLCB1/ACHE/ROCK2/GRK2/CHRM5	12	BP
GO:0051259	protein complex oligomerization	37/1159	247/18903	4.18629e-07	2.05e-06	7.26087e-07	TRPA1/MIF/TRPV1/SOD2/TP53/MS4A1/KCTD15/NLRP1/COL1A2/PRMT1/PKD1/CTH/SLC1A5/GSDMD/PRF1/TRPM2/ALDH1A2/SAMHD1/ASIC1/RYR1/EHD1/HPRT1/ALDOA/TP53BP1/GLS/ELAVL1/STK4/KCNA1/UPB1/SIGMAR1/TRPV5/ACACA/OPA1/TRPM7/DNM1L/SNCA/CD74	37	BP
GO:0050818	regulation of coagulation	18/1159	75/18903	4.45747e-07	2.18e-06	7.72503e-07	NOS3/SERPINE1/NFE2L2/F2RL1/F2R/PRKG1/THBD/CAV1/ANXA2/F3/FGG/F2/PRKCD/THBS1/PDGFA/PRDX2/F12/HPSE	18	BP
GO:0010717	regulation of epithelial to mesenchymal transition	22/1159	107/18903	4.47018e-07	2.18e-06	7.74086e-07	TGFB1/IL6/IL1B/SMAD3/SMAD2/HDAC2/TGFBR1/CTNNB1/MTOR/PTEN/NOTCH1/BMP2/COL1A1/ACVR1/DAG1/SFRP1/PTK2/JAG1/LEF1/ADIPOR1/TCF7L2/PDPN	22	BP
GO:0050848	regulation of calcium-mediated signaling	19/1159	83/18903	4.73705e-07	2.31e-06	8.19644e-07	TNF/CLEC7A/MTOR/PLCG2/NRG1/ITPR1/PTBP1/CDH13/BST1/GSK3B/HINT1/JPT2/LRRK2/GPR143/PTK2B/MAPT/CMKLR1/CALM1/CIB1	19	BP
[truncated: 6,568 more rows]

## Sheet: Supplementary Table 2
Supplementary Table 2. KEGG Analysis of Genes at the Intersection of 1-NP and Asthma.
[truncated: 337 more rows]

[truncated: 19 more sheets: Supplementary Table 3, Supplementary Table 4, Supplementary Table 5, Supplementary Table 6, Supplementary Table 7, Supplementary Table 8, Supplementary Table 9, Supplementary Table 10, Supplementary Table 11, Supplementary Table 12, Supplementary Table 13, Supplementary Table 14, Supplementary Table 15, Supplementary Table 16, Supplementary Table 17, Supplementary Table 18, Supplementary Table 19, Supplementary Table 20, Supplementary Table 21]
